# Supplementary material
Source: PubMed Central journal article supplement (PMC4143549)
Supplement: 13073_2014_57_MOESM5_ESM.pdf [file 13073_2014_57_MOESM5_ESM.pdf]

### Supplementary Table S3. Optimized SVM parameters and prediction models.

| Classifier               | Parameters |           |              |              |
|--------------------------|------------|-----------|--------------|--------------|
|                          | Cost (C)   | gamma (g) | Weight (Pos) | Weight (Neg) |
| Breast cancer (BrCa)     | 1024       | 2         | 20           | 0.2          |
| Pancreatic cancer (PaCa) | 256        | 4         | 1            | 0.01         |
| Ovarian cancer (OvCa)    | 512        | 2         | 20           | 0.2          |

#### \* BrCa prediction model

svm\_type c\_svc

kernel\_type rbf

gamma 2

nr\_class 2

total\_sv 2201

rho 12.4171

label 1 -1

probA -0.535191

probB 3.94904

nr\_sv 44 2157

SV

7082.008351685927 1:0.260209 2:0.201509 3:0.762539 5:0.492729

20480 1:0.293479 2:0.2041 3:0.471815 5:0.570088

3147.491170447641 1:0.326259 2:0.0921379 3:0.299601 5:0.564232

20480 1:0.264201 2:0.230232 3:0.528185 5:0.610098

20480 1:0.460601 2:0.131449 3:0.610297 5:0.758819

8338.904828053903 1:0.808783 2:0.395923 3:0.546826 5:0.708358

16506.60961961932 1:0.732717 2:0.0685965 3:0.564581 5:0.733238

20480 1:0.343349 2:0.161861 3:0.516201 5:0.738365

20480 1:0.531274 2:0.162424 3:0.568131 4:0.0337079 5:0.710767

3140.652189206647 1:0.638089 2:0.29207 3:0.544163 4:0.0449438 5:0.757278

417.6820464021787 1:0.301254 2:0.153188 3:0.403018 5:0.732762

10424.8281981128 1:0.333263 2:0.214688 3:0.403018 5:0.695946

15152.73912242495 1:0.305666 2:0.238004 3:0.584554 4:0.011236 5:0.736152

14592.81087892175 1:0.330392 2:0.209507 3:0.500666 5:0.749265

4471.511504339156 1:0.902991 2:0.237891 3:0.606303 4:0.011236 5:0.757362

7066.872511685857 1:0.260489 2:0.0832395 3:0.576121 4:0.0674157 5:0.693956

2904.987899915055 1:0.358339 2:0.0800856 3:0.528628 4:0.011236 5:0.78905  
4406.424652649509 1:0.271275 2:0.36934 3:0.695961 5:0.783083  
5707.90943420459 1:0.428661 2:0.202298 3:0.742122 5:0.780253  
20480 1:0.585767 2:0.311895 3:0.532623 5:0.713429  
8308.959413876559 1:0.512152 2:0.523203 3:0.492233 4:0.0224719 5:0.758006  
20480 1:0.577852 2:0.227078 3:0.633378 4:0.011236 5:0.691799  
5438.429354482301 1:0.629054 2:0.213449 3:0.343542 5:0.772492  
20480 1:0.693843 2:0.202748 3:0.472259 5:0.80051  
4432.65241028972 1:0.485746 2:0.258842 3:0.417221 5:0.821608  
269.7615796007815 1:0.731246 2:0.706691 3:0.454949 5:0.832255  
1350.731726224118 1:0.440779 2:0.104303 3:0.524634 4:0.011236 5:0.797624  
634.3399049070412 1:0.314982 2:0.324848 3:0.44696 4:0.0561798 5:0.772324  
1867.900129328617 2:0.133589 3:0.620062 5:0.82766  
20480 1:0.49142 2:0.156342 3:0.627164 5:0.749713  
2213.686466264981 1:0.651467 2:0.107344 3:0.65779 5:0.80135  
6905.620942568542 1:0.753169 2:0.364159 3:0.584554 5:0.852568  
2883.431655392702 1:0.62359 2:0.361793 3:0.615624 5:0.884929  
1075.955823955658 1:0.758493 2:0.199369 3:0.747892 4:0.0337079 5:0.923958  
1982.137627337464 1:0.765637 2:0.305136 3:0.671549 4:0.011236 5:0.893867  
6.558525071695018 1:0.637109 2:0.309079 3:0.578784 4:1 5:0.924099  
790.825649756114 1:0.747146 2:0.962154 3:0.517976 5:0.885798  
1731.184993250921 1:0.757862 2:0.463055 3:0.613848 5:0.926508  
20480 1:0.300553 2:0.182023 3:0.528185  
20480 2:0.282496 3:0.536174  
20480 1:0.256987 2:0.139333 3:0.544607  
15303.1272705858 1:0.539329 2:0.290155 3:0.737683 4:0.011236  
20480 1:0.554248 2:0.232597 3:0.524634  
12770.54726743454 1:0.555929 2:0.163212 3:0.774079  
-204.8 1:0.420116 2:0.2041 3:0.446072 5:0.690034  
-204.8 1:0.271626 2:0.227754 3:0.521971 5:0.637135  
-204.8 1:0.309869 2:0.214688 3:0.477585 5:0.498669  
-204.8 1:0.27877 2:0.0915747 3:0.356858 5:0.666835  
-204.8 1:0.34482 2:0.148006 3:0.426099 5:0.681797  
-204.8 1:0.284794 2:0.244424 3:0.44474 5:0.704463  
-204.8 1:0.283113 2:0.143951 3:0.517088 5:0.682945

-204.8 1:0.298662 2:0.208606 3:0.55881 4:0.011236 5:0.687652  
-204.8 1:0.319185 2:0.188331 3:0.425211 5:0.541705  
-204.8 1:0.270715 2:0.213336 3:0.51842 5:0.614805  
-204.8 1:0.303635 2:0.231809 3:0.546383 5:0.56185  
-204.8 1:0.29453 2:0.162199 3:0.616511 5:0.693564  
-204.8 1:0.565245 2:0.106105 3:0.649356 5:0.685607  
-204.8 1:0.34475 2:0.187317 3:0.722148 5:0.526295  
-204.8 1:0.289206 2:0.203312 3:0.666223 4:0.011236 5:0.590681  
-204.8 1:0.274778 2:0.128633 3:0.436751 5:0.541929  
-204.8 1:0.400154 2:0.243073 3:0.741678 5:0.572777  
-204.8 1:0.300273 2:0.239919 3:0.545939 5:0.585498  
-204.8 1:0.457939 2:0.169745 3:0.538837 5:0.710515  
-204.8 1:0.263291 2:0.228655 3:0.768753 5:0.564456  
-204.8 1:0.257827 2:0.206578 3:0.642255 4:0.011236 5:0.610742  
-204.8 1:0.285914 2:0.175039 3:0.475366 5:0.670785  
-204.8 1:0.287665 2:0.233611 3:0.611185 5:0.589308  
-204.8 1:0.276529 2:0.16355 3:0.684865 5:0.420022  
-204.8 1:0.268194 2:0.294999 3:0.580559 5:0.543414  
-86.11792947846041 1:0.275828 2:0.138094 3:0.552153 5:0.506514  
-204.8 1:0.324998 2:0.310656 3:0.599645 5:0.692359  
-204.8 1:0.649786 2:0.382293 3:0.58988 4:0.0224719 5:0.628422  
-204.8 1:0.283323 2:0.170083 3:0.577452 4:0.011236 5:0.703735  
-204.8 1:0.26175 2:0.172787 3:0.565468 5:0.65983  
-204.8 1:0.257057 2:0.11872 3:0.521971 5:0.503376  
-204.8 1:0.265952 2:0.313246 3:0.367066 5:0.597798  
-204.8 1:0.263921 2:0.100811 3:0.367954 5:0.597798  
-204.8 1:0.291448 2:0.203199 3:0.391478 5:0.629935  
-204.8 1:0.253204 2:0.16141 3:0.521971 5:0.588187  
-204.8 1:0.27856 2:0.186078 3:0.443409 4:0.011236 5:0.542462  
-204.8 1:0.314982 2:0.123001 3:0.443409 5:0.597013  
-204.8 1:0.257897 2:0.250845 3:0.590324 4:0.0449438 5:0.617915  
-204.8 1:0.31134 2:0.299279 3:0.519751 4:0.011236 5:0.681292  
-204.8 1:0.272046 2:0.196441 3:0.51265 5:0.66605  
-204.8 1:0.460951 2:0.197116 3:0.726587 4:0.0224719 5:0.582528  
-204.8 1:0.257127 2:0.125253 3:0.381713 4:0.011236 5:0.608052

-204.8 1:0.298242 2:0.238455 3:0.484687 5:0.50248  
-204.8 1:0.429992 2:0.0790719 3:0.60142 4:0.0224719 5:0.730212  
-204.8 1:0.27884 2:0.191485 3:0.579672 4:0.011236 5:0.612675  
-204.8 1:0.282342 2:0.188218 3:0.566356 5:0.676781  
-204.8 1:0.511172 2:0.162086 3:0.520195 4:0.0224719 5:0.72346  
-204.8 1:0.293969 2:0.108132 3:0.627608 5:0.412541  
-204.8 1:0.257967 2:0.201847 3:0.575677 4:0.011236 5:0.421199  
-204.8 1:0.345661 2:0.253999 3:0.685308 5:0.557255  
-204.8 1:0.378301 2:0.254111 3:0.571238 5:0.704463  
-204.8 1:0.316943 2:0.271007 3:0.592543 5:0.499089  
-204.8 1:0.277509 2:0.202298 3:0.468708 5:0.61657  
-204.8 1:0.286615 2:0.159495 3:0.335996 5:0.50601  
-204.8 1:0.29488 2:0.120973 3:0.469596 5:0.371046  
-204.8 1:0.338727 2:0.253323 3:0.574345 5:0.505253  
-204.8 1:0.27793 2:0.184726 3:0.488682 5:0.440279  
-204.8 1:0.265252 2:0.182699 3:0.501553 5:0.582136  
-204.8 1:0.287876 2:0.201509 3:0.619174 5:0.532151  
-204.8 1:0.60678 2:0.0750169 3:0.642699 5:0.699224  
-204.8 1:0.300623 2:0.228205 3:0.617399 5:0.551456  
-204.8 1:0.263851 2:0.16524 3:0.499778 5:0.705304  
-204.8 1:0.269524 2:0.249831 3:0.457612 5:0.619036  
-204.8 2:0.364384 3:0.710608 5:0.402342  
-204.8 1:0.287876 2:0.12255 3:0.457168 5:0.517553  
-204.8 1:0.346922 2:0.215927 3:0.684421 5:0.551147  
-204.8 2:0.241946 3:0.53573 5:0.000336219  
-204.8 1:0.300133 2:0.24082 3:0.530404 5:0.432686  
-166.9344140109237 2:0.249493 3:0.548158 5:0.506066  
-204.8 1:0.349513 2:0.19768 3:0.430537 5:0.718669  
-204.8 1:0.26217 2:0.144402 3:0.488238 4:0.011236 5:0.598078  
-204.8 1:0.768929 2:0.144852 3:0.44696 5:0.716819  
-204.8 1:0.268684 2:0.145303 3:0.528628 5:0.577541  
-204.8 1:0.271275 2:0.248705 3:0.596094 5:0.555686  
-204.8 1:0.299993 2:0.220996 3:0.529072 4:0.0224719 5:0.578437  
-204.8 1:0.315893 2:0.176391 3:0.545495 5:0.64061  
-204.8 1:0.321636 2:0.257378 3:0.490013 5:0.656524

-204.8 1:0.281642 2:0.226402 3:0.568575 5:0.561122  
-204.8 1:0.319185 2:0.226853 3:0.573901 5:0.682777  
-204.8 1:0.282342 2:0.210408 3:0.474478 4:0.011236 5:0.59239  
-204.8 1:0.332423 2:0.196891 3:0.514869 5:0.728727  
-204.8 1:0.347132 2:0.231809 3:0.540169 5:0.637051  
-204.8 1:0.259929 2:0.0840279 3:0.354194 5:0.569976  
-204.8 1:0.298382 2:0.261433 3:0.55526 5:0.626096  
-204.8 1:0.323667 2:0.197454 3:0.58411 5:0.474714  
-204.8 1:0.620088 2:0.373057 3:0.49534 4:0.0674157 5:0.601636  
-204.8 1:0.271766 2:0.227641 3:0.725699 5:0.481522  
-204.8 1:0.351685 2:0.128745 3:0.471372 5:0.664201  
-204.8 1:0.279611 2:0.275062 3:0.575677 5:0.621501  
-204.8 1:0.572809 2:0.220658 3:0.592543 4:0.011236 5:0.704463  
-204.8 1:0.696295 2:0.227416 3:0.785175 5:0.000336219  
-204.8 1:0.334244 2:0.235864 3:0.525522 5:0.55832  
-204.8 1:0.520628 2:0.26132 3:0.65202 4:0.0561798 5:0.710515  
-204.8 1:0.516565 2:0.221221 3:0.594319 5:0.000336219  
-204.8 1:0.501296 2:0.104415 3:0.644918 5:0.728167  
-204.8 1:0.258037 2:0.218968 3:0.608078 5:0.597181  
-204.8 1:0.299783 2:0.154201 3:0.444296 5:0.559077  
-204.8 1:0.334874 2:0.217504 3:0.594319 5:0.687652  
-204.8 1:0.309449 2:0.24296 3:0.572126 4:0.011236 5:0.569976  
-204.8 1:0.519017 2:0.154652 3:0.570794 5:0.730212  
-204.8 1:0.309589 2:0.16952 3:0.51842 4:0.011236 5:0.644252  
-204.8 1:0.468376 2:0.182023 3:0.50111 5:0.703735  
-204.8 2:0.158369 3:0.537062 4:0.011236 5:0.442521  
-204.8 1:0.331162 2:0.152174 3:0.684421 4:0.0674157 5:0.685607  
-204.8 1:0.241647 2:0.198243 3:0.46427 4:0.011236 5:0.563279  
-204.8 1:0.509141 2:0.433769 3:0.532623 4:0.0224719 5:0.675633  
-204.8 1:0.334104 2:0.110948 3:0.582335 4:0.011236 5:0.727382  
-204.8 1:0.44274 2:0.235413 3:0.524634 4:0.011236 5:0.687652  
-204.8 1:0.536948 2:0.08369 3:0.641811 4:0.011236 5:0.674232  
-204.8 1:0.50879 2:0.182699 3:0.540169 4:0.0674157 5:0.679891  
-204.8 1:0.291938 2:0.214688 3:0.7581 4:0.011236 5:0.609537  
-204.8 1:0.384465 2:0.275062 3:0.583222 5:0.688381

-204.8 1:0.44302 2:0.290155 3:0.766977 5:0.492925  
-204.8 1:0.397843 2:0.159833 3:0.620506 4:0.011236 5:0.730212  
-204.8 1:0.316243 2:0.203086 3:0.446072 5:0.558796  
-204.8 1:0.331932 2:0.124578 3:0.595206 4:0.0224719 5:0.687652  
-204.8 1:0.29467 2:0.282609 3:0.624945 5:0.705304  
-204.8 1:0.42579 2:0.274724 3:0.423435 5:0.649211  
-204.8 1:0.40926 2:0.176842 3:0.443853 4:0.011236 5:0.688381  
-204.8 1:0.263361 2:0.114553 3:0.402574 5:0.583536  
-204.8 1:0.421237 2:0.213336 3:0.531735 5:0.692359  
-204.8 1:0.252574 2:0.229894 3:0.550377 5:0.608193  
-204.8 1:0.319255 2:0.179658 3:0.443409 4:0.011236 5:0.592418  
-204.8 1:0.251664 2:0.170421 3:0.507767 5:0.568463  
-204.8 1:0.26231 2:0.152174 3:0.559698 5:0.411392  
-204.8 1:0.285844 2:0.223812 3:0.493564 4:0.011236 5:0.657673  
-204.8 1:0.249352 2:0.248592 3:0.528185 5:0.507215  
-204.8 1:0.304126 2:0.184614 3:0.51265 4:0.0224719 5:0.705304  
-204.8 1:0.305666 2:0.149358 3:0.404794 5:0.619036  
-204.8 1:0.517406 2:0.186641 3:0.764758 5:0.477992  
-204.8 1:0.270855 2:0.16524 3:0.40435 4:0.011236 5:0.577541  
-204.8 1:0.293129 2:0.128633 3:0.746116 4:0.11236 5:0.694433  
-204.8 1:0.78616 2:0.193963 3:0.434976 5:0.730212  
-204.8 1:0.807453 2:0.1738 3:0.604083 5:0.716819  
-204.8 1:0.276879 2:0.27754 3:0.564581 5:0.569303  
-204.8 1:0.270575 2:0.225727 3:0.586773 5:0.663893  
-204.8 1:0.63879 2:0.153188 3:0.564581 4:0.011236 5:0.727382  
-204.8 1:0.32773 2:0.176842 3:0.49312 4:0.011236 5:0.598274  
-204.8 1:0.57407 2:0.365285 3:0.489569 5:0.727382  
-204.8 1:0.54031 2:0.224262 3:0.736795 4:0.011236 5:0.000336219  
-204.8 1:0.563424 2:0.0728768 3:0.595206 4:0.011236 5:0.696562  
-204.8 1:0.568117 2:0.151385 3:0.515313 4:0.011236 5:0.730212  
-35.94401016003604 2:0.18191 3:0.266755 5:0.582023  
-204.8 1:0.342649 2:0.162311 3:0.447847 5:0.707826  
-204.8 1:0.354766 2:0.141699 3:0.457168 5:0.643748  
-204.8 1:0.452686 2:0.313922 3:0.575233 4:0.011236 5:0.727382  
-204.8 1:0.533796 2:0.240032 3:0.547714 5:0.727382

-204.8 1:0.601457 2:0.120297 3:0.6751 4:0.0224719 5:0.728167  
-204.8 1:0.387546 2:0.193737 3:0.409232 5:0.730212  
-204.8 1:0.62324 2:0.441654 3:0.528185 5:0.6686  
-204.8 1:0.566646 2:0.130998 3:0.710164 4:0.0337079 5:0.670365  
-204.8 1:0.579954 2:0.221897 3:0.591656 4:0.011236 5:0.705136  
-204.8 1:0.568747 2:0.249268 3:0.518864 5:0.000420274  
-204.8 1:0.288226 2:0.105429 3:0.43897 5:0.6259  
-204.8 1:0.506619 2:0.299166 3:0.605859 5:0.727382  
-204.8 1:0.403376 2:0.272133 3:0.502885 5:0.698607  
-204.8 1:0.415353 2:0.193963 3:0.620506 5:0.688381  
-204.8 1:0.502487 2:0.101712 3:0.534842 5:0.727382  
-204.8 1:0.321356 2:0.169633 3:0.521971 5:0.424701  
-204.8 1:0.714086 2:0.268867 3:0.540169 4:0.0224719 5:0.657953  
-204.8 1:0.322337 2:0.231471 3:0.471815 5:0.600459  
-204.8 1:0.247041 2:0.231358 3:0.498447 5:0.587935  
-204.8 1:0.298872 2:0.152962 3:0.658233 4:0.011236 5:0.682945  
-204.8 1:0.641661 2:0.158369 3:0.563249 4:0.011236 5:0.727382  
-204.8 1:0.300273 2:0.210295 3:0.39281 5:0.585274  
-204.8 1:0.404847 2:0.200158 3:0.543276 5:0.678182  
-204.8 1:0.52462 2:0.148232 3:0.695073 4:0.0224719 5:0.691127  
-204.8 1:0.746655 2:0.110385 3:0.526409 5:0.688381  
-204.8 1:0.268894 2:0.207592 3:0.504217 5:0.456081  
-204.8 1:0.461512 2:0.149358 3:0.520639 5:0.710515  
-204.8 1:0.45969 2:0.176504 3:0.339547 5:0.674232  
-204.8 1:0.545283 2:0.0990088 3:0.599201 5:0.728167  
-204.8 1:0.410661 2:0.190133 3:0.624945 5:0.695834  
-204.8 1:0.684177 2:0.060036 3:0.611185 4:0.0224719 5:0.657028  
-204.8 1:0.413042 2:0.199595 3:0.584554 4:0.0449438 5:0.661651  
-204.8 1:0.314702 2:0.228205 3:0.543276 5:0.610686  
-204.8 1:0.271486 2:0.175152 3:0.561474 4:0.011236 5:0.624247  
-204.8 1:0.516285 2:0.126267 3:0.779849 4:0.011236 5:0.000420274  
-204.8 1:0.371647 2:0.153751 3:0.537062 4:0.0224719 5:0.707882  
-204.8 1:0.34489 2:0.178306 3:0.478473 5:0.608501  
-204.8 1:0.283533 2:0.140122 3:0.376831 5:0.674232  
-204.8 1:0.269735 2:0.198355 3:0.498003 5:0.456081

-204.8 1:0.331232 2:0.154201 3:0.446072 5:0.6686  
-204.8 1:0.496043 2:0.242735 3:0.564137 4:0.0224719 5:0.705304  
-204.8 1:0.419696 2:0.219531 3:0.446516 5:0.673615  
-204.8 1:0.261469 2:0.195877 3:0.470484 5:0.603401  
-204.8 1:0.695734 2:0.296576 3:0.610741 4:0.011236 5:0.688577  
-204.8 1:0.601177 2:0.0883082 3:0.653795 5:0.69009  
-106.7157627902209 1:0.614415 2:0.451791 3:0.408788 5:0.588916  
-204.8 1:0.309799 2:0.15882 3:0.441633 4:0.011236 5:0.556443  
-204.8 1:0.355537 2:0.184276 3:0.456724 5:0.595388  
-204.8 1:0.597184 2:0.296013 3:0.57834 4:0.011236 5:0.707882  
-204.8 1:0.338376 2:0.282271 3:0.588992 5:0.669188  
-204.8 1:0.374729 2:0.210746 3:0.600089 4:0.0224719 5:0.632681  
-204.8 1:0.309239 2:0.13494 3:0.403462 5:0.552324  
-204.8 1:0.293969 2:0.199595 3:0.699956 5:0.435908  
-204.8 1:0.269875 2:0.136405 3:0.457168 5:0.412289  
-204.8 1:0.317644 2:0.146204 3:0.55526 5:0.687652  
-204.8 1:0.356097 2:0.223248 3:0.450954 5:0.56185  
-204.8 1:0.269524 2:0.250507 3:0.554372 5:0.674035  
-204.8 1:0.497794 2:0.272809 3:0.677319 5:0.000336219  
-204.8 1:0.283813 2:0.131674 3:0.500222 5:0.634866  
-204.8 1:0.329201 2:0.264587 3:0.491345 5:0.594436  
-204.8 1:0.336485 2:0.194526 3:0.536618 5:0.62845  
-204.8 1:0.341598 2:0.216603 3:0.526409 5:0.65106  
-204.8 1:0.307347 2:0.208042 3:0.507767 4:0.0224719 5:0.635062  
-204.8 1:0.36093 2:0.198468 3:0.587217 5:0.687652  
-204.8 1:0.268404 2:0.157806 3:0.434976 4:0.0337079 5:0.596621  
-204.8 1:0.323737 2:0.196891 3:0.456724 4:0.011236 5:0.49979  
-204.8 1:0.264551 2:0.168732 3:0.507324 5:0.628926  
-204.8 1:0.513833 2:0.144177 3:0.526853 5:0.718332  
-204.8 1:0.256356 2:0.171322 3:0.395029 5:0.687652  
-204.8 1:0.307628 2:0.205902 3:0.533067 4:0.011236 5:0.550279  
-204.8 1:0.528753 2:0.234174 3:0.583666 5:0.711748  
-204.8 1:0.365903 2:0.236878 3:0.550821 5:0.687652  
-204.8 1:0.457519 2:0.22629 3:0.44119 5:0.692443  
-204.8 1:0.312321 2:0.174814 3:0.541056 5:0.636071



-204.8 1:0.321286 2:0.157468 3:0.588105 4:0.011236 5:0.678182  
-204.8 1:0.27933 2:0.139671 3:0.278296 4:0.011236 5:0.654199  
-204.8 1:0.531694 2:0.275062 3:0.471815 4:0.0337079 5:0.687652  
-204.8 1:0.271416 2:0.285537 3:0.476254 5:0.656524  
-39.58873051748015 1:0.496743 2:0.0915747 3:0.714159 5:0.698607  
-204.8 1:0.313931 2:0.163325 3:0.552153 5:0.687652  
-204.8 1:0.257827 2:0.214913 3:0.538393 5:0.597406  
-204.8 1:0.280871 2:0.134377 3:0.409232 5:0.599731  
-204.8 1:0.263431 2:0.16569 3:0.545051 4:0.011236 5:0.5702  
-204.8 1:0.277019 2:0.251295 3:0.535286 5:0.554706  
-204.8 1:0.272536 2:0.29162 3:0.657346 5:0.687652  
-204.8 1:0.800798 2:0.0999099 3:0.613404 5:0.692443  
-204.8 1:0.277159 2:0.240032 3:0.412783 5:0.577737  
-101.8143520400093 1:0.31071 2:0.215702 3:0.577896 5:0.569948  
-204.8 1:0.274287 2:0.236089 3:0.579672 5:0.50234  
-204.8 1:0.267703 2:0.184276 3:0.587661 5:0.698607  
-204.8 1:0.611403 2:0.261996 3:0.695517 5:0.000420274  
-204.8 1:0.323317 2:0.171773 3:0.537506 5:0.654114  
-204.8 1:0.354206 2:0.229781 3:0.492233 5:0.613656  
-204.8 1:0.504658 2:0.202298 3:0.460719 5:0.727382  
-204.8 1:0.286054 2:0.266727 3:0.652907 5:0.688381  
-204.8 1:0.532255 2:0.0465195 3:0.624501 5:0.685607  
-204.8 1:0.250753 2:0.231133 3:0.477142 5:0.629683  
-204.8 1:0.283323 2:0.296801 3:0.610741 5:0.479  
-204.8 1:0.251453 2:0.0912368 3:0.442521 4:0.011236 5:0.687652  
-204.8 1:0.284093 2:0.195314 3:0.519751 5:0.652658  
-79.80941494274605 2:0.267515 3:0.274745 5:0.467261  
-204.8 1:0.29474 2:0.356499 3:0.42743 5:0.646101  
-204.8 1:0.270295 2:0.227754 3:0.565912 5:0.577737  
-204.8 1:0.609232 2:0.189908 3:0.567688 5:0.737441  
-204.8 1:0.824683 2:0.365848 3:0.575677 5:0.626152  
-204.8 1:0.384605 2:0.269993 3:0.606747 5:0.69617  
-204.8 1:0.272816 2:0.145641 3:0.530404 4:0.011236 5:0.601832  
-204.8 1:0.306927 2:0.169745 3:0.562361 4:0.0224719 5:0.609369  
-204.8 1:0.570988 2:0.156342 3:0.507324 4:0.0224719 5:0.722171

-204.8 1:0.316523 2:0.154201 3:0.542388 4:0.011236 5:0.650416  
-204.8 1:0.376059 2:0.298378 3:0.487794 5:0.688437  
-204.8 1:0.390698 2:0.254337 3:0.570351 4:0.011236 5:0.65927  
-204.8 1:0.276038 2:0.22032 3:0.521971 5:0.702978  
-204.8 1:0.250473 2:0.141023 3:0.506436 4:0.011236 5:0.655964  
-204.8 1:0.598235 2:0.259968 3:0.555704 5:0.725449  
-204.8 1:0.239616 2:0.171097 3:0.506436 5:0.626096  
-204.8 1:0.383344 2:0.217954 3:0.281403 4:0.011236 5:0.57359  
-204.8 1:0.288366 2:0.215364 3:0.536618 4:0.011236 5:0.698664  
-204.8 1:0.372487 2:0.129083 3:0.546826 5:0.701914  
-204.8 1:0.277159 2:0.13021 3:0.624945 5:0.710543  
-204.8 1:0.685648 2:0.186641 3:0.58411 5:0.722591  
-204.8 1:0.251523 2:0.251295 3:0.762539 4:0.011236 5:0.541285  
-204.8 1:0.276809 2:0.238905 3:0.70617 5:0.59494  
-204.8 1:0.381102 2:0.162762 3:0.561474 5:0.708022  
-204.8 1:0.290047 2:0.291282 3:0.33644 5:0.570032  
-204.8 1:0.289977 2:0.287002 3:0.723924 4:0.0224719 5:0.6505  
-204.8 1:0.31176 2:0.162537 3:0.624945 4:0.0337079 5:0.685775  
-204.8 1:0.498004 2:0.239694 3:0.664004 5:0.741391  
-204.8 1:0.500455 2:0.353909 3:0.52996 5:0.761284  
-204.8 1:0.382363 2:0.157243 3:0.617843 4:0.011236 5:0.725449  
-204.8 1:0.270365 2:0.236765 3:0.367954 4:0.0337079 5:0.635118  
-204.8 1:0.291518 2:0.255913 3:0.752774 5:0.615057  
-204.8 1:0.315262 2:0.193062 3:0.414558 5:0.618811  
-204.8 1:0.249142 2:0.206803 3:0.569907 5:0.560646  
-204.8 1:0.321566 2:0.193737 3:0.565912 5:0.729147  
-204.8 1:0.271065 2:0.275175 3:0.522858 5:0.679555  
-204.8 1:0.31204 2:0.141361 3:0.570351 5:0.742428  
-204.8 1:0.334944 2:0.12424 3:0.598313 4:0.011236 5:0.713121  
-204.8 1:0.270435 2:0.254787 3:0.481136 5:0.642487  
-204.8 1:0.326749 2:0.22246 3:0.385264 5:0.626685  
-204.8 1:0.271556 2:0.283397 3:0.565468 5:0.674428  
-204.8 1:0.795545 2:0.349403 3:0.584554 5:0.687961  
-204.8 1:0.275898 2:0.301194 3:0.591656 5:0.522877  
-204.8 1:0.271836 2:0.170309 3:0.426542 4:0.0449438 5:0.608697

-204.8 1:0.320656 2:0.186303 3:0.499334 5:0.600964  
-204.8 1:0.566646 2:0.0869565 3:0.660897 4:0.0337079 5:0.622454  
-204.8 1:0.233032 2:0.119058 3:0.651132 4:0.0561798 5:0.654927  
-204.8 1:0.400084 2:0.240933 3:0.530404 5:0.664061  
-204.8 1:0.247391 2:0.199932 3:0.587661 5:0.662884  
-204.8 1:0.351194 2:0.238567 3:0.469596 5:0.507915  
-204.8 1:0.396792 2:0.190471 3:0.513094 5:0.679107  
-204.8 1:0.427541 2:0.267515 3:0.560586 4:0.011236 5:0.690034  
-204.8 1:0.261189 2:0.195427 3:0.522858 5:0.502171  
-204.8 1:0.597955 2:0.22077 3:0.623613 4:0.011236 5:0.698439  
-204.8 1:0.261399 2:0.155328 3:0.452286 5:0.60483  
-204.8 1:0.298732 2:0.231471 3:0.435419 4:0.0224719 5:0.679891  
-204.8 1:0.404217 2:0.182474 3:0.451398 5:0.652097  
-204.8 1:0.431883 2:0.193399 3:0.553928 5:0.716847  
-204.8 1:0.305386 2:0.264474 3:0.579672 5:0.472052  
-204.8 1:0.611753 2:0.282271 3:0.786507 5:0.43179  
-204.8 1:0.26273 2:0.236202 3:0.567688 5:0.709815  
-204.8 1:0.349303 2:0.120861 3:0.567688 5:0.727326  
-204.8 1:0.302865 2:0.219869 3:0.410564 5:0.656188  
-204.8 1:0.253975 2:0.283622 3:0.550821 4:0.0337079 5:0.550279  
-204.8 1:0.284514 2:0.234512 3:0.575677 4:0.011236 5:0.700457  
-204.8 1:0.843104 2:0.135391 3:0.520639 5:0.712028  
-204.8 1:0.340338 2:0.150597 3:0.516201 4:0.011236 5:0.659774  
-204.8 1:0.374378 2:0.282721 3:0.537949 5:0.67412  
-204.8 1:0.472928 2:0.120185 3:0.74079 4:0.0224719 5:0.673643  
-204.8 1:0.567556 2:0.321356 3:0.562805 4:0.0224719 5:0.706761  
-204.8 1:0.649226 2:0.375535 3:0.520639 5:0.698664  
-71.30308318301795 1:0.873713 2:0.169182 3:0.515757 5:0.67227  
-204.8 1:0.496883 2:0.315724 3:0.528185 5:0.736068  
-204.8 1:0.443651 2:0.12424 3:0.551265 5:0.744165  
-204.8 1:0.536597 2:0.158482 3:0.536618 5:0.724973  
-204.8 1:0.340198 2:0.226064 3:0.569907 5:0.659214  
-204.8 1:0.648876 2:0.152174 3:0.541944 5:0.759771  
-204.8 1:0.665756 2:0.29207 3:0.473147 5:0.703427  
-204.8 1:0.510682 2:0.293084 3:0.482024 5:0.69701

-204.8 1:0.324928 2:0.320455 3:0.63249 5:0.737833  
-204.8 1:0.317854 2:0.23057 3:0.671105 4:0.011236 5:0.703287  
-204.8 1:0.552497 2:0.206465 3:0.526853 4:0.0224719 5:0.728979  
-204.8 1:0.272256 2:0.302658 3:0.599201 5:0.68656  
-204.8 1:0.595293 2:0.248141 3:0.637816 4:0.0561798 5:0.654086  
-204.8 1:0.349863 2:0.176842 3:0.468265 5:0.651705  
-204.8 1:0.404777 2:0.27326 3:0.557923 5:0.699924  
-204.8 1:0.310079 2:0.201397 3:0.633822 5:0.733882  
-204.8 1:0.502066 2:0.18957 3:0.536174 4:0.101124 5:0.649295  
-204.8 1:0.380262 2:0.208943 3:0.476698 5:0.669609  
-204.8 1:0.430833 2:0.250845 3:0.488682 5:0.726962  
-204.8 1:0.476641 2:0.209169 3:0.569019 4:0.011236 5:0.692135  
-204.8 1:0.794565 2:0.427123 3:0.547714 5:0.702866  
-204.8 1:0.440499 2:0.189119 3:0.591212 4:0.011236 5:0.718528  
-204.8 1:0.678924 2:0.118608 3:0.503329 4:0.011236 5:0.71836  
-204.8 1:0.40912 2:0.131336 3:0.5668 4:0.011236 5:0.691547  
-204.8 1:0.599075 2:0.102501 3:0.670661 4:0.0224719 5:0.665154  
-204.8 1:0.615606 2:0.234625 3:0.581891 5:0.733854  
-204.8 1:0.293479 2:0.159157 3:0.463826 4:0.011236 5:0.710795  
-204.8 1:0.277859 2:0.10847 3:0.5668 5:0.72713  
-204.8 1:0.586888 2:0.19216 3:0.692854 4:0.0449438 5:0.666358  
-204.8 1:0.331022 2:0.214012 3:0.528185 4:0.0449438 5:0.589056  
-204.8 1:0.438327 2:0.200834 3:0.606303 4:0.011236 5:0.68429  
-204.8 1:0.534846 2:0.455733 3:0.44119 5:0.706985  
-204.8 1:0.323597 2:0.117819 3:0.575233 5:0.710263  
-134.1491031653977 1:0.460251 2:0.182136 3:0.539725 4:0.0224719 5:0.6744  
-204.8 1:0.553968 2:0.14046 3:0.570794 5:0.741784  
-204.8 1:0.336135 2:0.215814 3:0.610297 4:0.0224719 5:0.682217  
-204.8 1:0.626672 2:0.204776 3:0.57834 5:0.727438  
-204.8 1:0.348463 2:0.131561 3:0.581447 5:0.694685  
-204.8 1:0.649086 2:0.0860554 3:0.678207 5:0.738506  
-204.8 1:0.577292 2:0.137306 3:0.6751 5:0.726346  
-204.8 1:0.789592 2:0.161072 3:0.592543 5:0.703707  
-204.8 1:0.282973 2:0.230683 3:0.437195 5:0.673055  
-204.8 1:0.6556 2:0.0694976 3:0.71771 4:0.0224719 5:0.6939

-204.8 1:0.695945 2:0.282834 3:0.540169 4:0.011236 5:0.703791  
-204.8 1:0.271906 2:0.152962 3:0.51842 5:0.595612  
-204.8 1:0.806682 2:0.0646542 3:0.564137 5:0.661651  
-204.8 1:0.489949 2:0.216265 3:0.623169 5:0.696758  
-204.8 1:0.62317 2:0.0750169 3:0.581891 5:0.676333  
-204.8 1:0.275898 2:0.20196 3:0.541944 5:0.668656  
-204.8 1:0.650417 2:0.231471 3:0.457168 4:0.011236 5:0.707882  
-204.8 1:0.416684 2:0.231584 3:0.636041 4:0.011236 5:0.657981  
-204.8 1:0.32766 2:0.200158 3:0.516644 4:0.011236 5:0.620437  
-204.8 1:0.335645 2:0.20196 3:0.525965 5:0.652489  
-204.8 1:0.293549 2:0.198355 3:0.309809 5:0.560814  
-204.8 1:0.632766 2:0.172787 3:0.511318 4:0.011236 5:0.737273  
-204.8 1:0.729285 2:0.383082 3:0.567244 4:0.011236 5:0.696562  
-204.8 1:0.545913 2:0.178756 3:0.546383 4:0.011236 5:0.707685  
-204.8 1:0.469777 2:0.165015 3:0.494896 5:0.716847  
-204.8 1:0.633747 2:0.106556 3:0.624945 5:0.680592  
-204.8 1:0.665056 2:0.264812 3:0.535286 4:0.011236 5:0.700345  
-204.8 1:0.572739 2:0.112525 3:0.56103 5:0.742624  
-204.8 1:0.677033 2:0.0791845 3:0.466933 5:0.714298  
-204.8 1:0.350214 2:0.240482 3:0.454949 5:0.581295  
-204.8 1:0.281712 2:0.329128 3:0.447403 5:0.707938  
-204.8 1:0.320656 2:0.12041 3:0.629827 4:0.0224719 5:0.706621  
-32.73671064310367 1:0.304896 2:0.100135 3:0.577452 4:0.011236 5:0.691351  
-204.8 1:0.309029 2:0.162987 3:0.537949 5:0.641702  
-204.8 1:0.420887 2:0.122775 3:0.732801 4:0.011236 5:0.768793  
-204.8 1:0.324858 2:0.107457 3:0.399467 4:0.011236 5:0.644252  
-204.8 1:0.42621 2:0.212323 3:0.441633 5:0.652658  
-204.8 1:0.259929 2:0.171998 3:0.467821 5:0.694853  
-204.8 1:0.668418 2:0.19768 3:0.587217 4:0.0224719 5:0.69645  
-204.8 1:0.700357 2:0.33476 3:0.529516 5:0.741391  
-204.8 1:0.733698 2:0.231696 3:0.55526 4:0.0224719 5:0.684094  
-204.8 1:0.576522 2:0.217954 3:0.474035 4:0.011236 5:0.721218  
-204.8 1:0.322687 2:0.269768 3:0.532623 5:0.664061  
-204.8 1:0.401835 2:0.306263 3:0.362184 5:0.604634  
-204.8 1:0.418575 2:0.201509 3:0.479805 5:0.738926

-204.8 1:0.47517 2:0.138883 3:0.676431 4:0.0224719 5:0.6809  
-204.8 1:0.383834 2:0.114102 3:0.570351 5:0.70917  
-204.8 1:0.406248 2:0.0723136 3:0.679982 4:0.0561798 5:0.686307  
-204.8 1:0.339077 2:0.194638 3:0.608522 5:0.678014  
-204.8 1:0.45822 2:0.187655 3:0.689303 5:0.732341  
-204.8 1:0.558381 2:0.216828 3:0.658233 4:0.0224719 5:0.699224  
-204.8 1:0.40996 2:0.120635 3:0.565468 4:0.0224719 5:0.706481  
-204.8 1:0.614975 2:0.601825 3:0.533511 5:0.652041  
-204.8 1:0.441409 2:0.223023 3:0.498003 5:0.688213  
-204.8 1:0.39399 2:0.160509 3:0.684421 5:0.686784  
-204.8 1:0.268964 2:0.19768 3:0.509543 5:0.645429  
-204.8 1:0.275898 2:0.141811 3:0.471815 4:0.011236 5:0.65036  
-204.8 1:0.381593 2:0.153188 3:0.525522 5:0.6939  
-204.8 1:0.26231 2:0.13235 3:0.614736 4:0.011236 5:0.67793  
-204.8 1:0.285354 2:0.194413 3:0.674656 4:0.0224719 5:0.524166  
-204.8 1:0.47587 2:0.114328 3:0.739015 5:0.744613  
-204.8 1:0.288226 2:0.190471 3:0.620506 4:0.0449438 5:0.629739  
-204.8 1:0.468025 2:0.266614 3:0.533511 4:0.0224719 5:0.718528  
-204.8 1:0.338797 2:0.160059 3:0.594763 5:0.69984  
-204.8 1:0.260909 2:0.249493 3:0.802929 5:0.676809  
-204.8 1:0.625131 2:0.145528 3:0.565468 5:0.725449  
-204.8 1:0.288716 2:0.121649 3:0.435863 4:0.011236 5:0.696618  
-204.8 1:0.432094 2:0.144177 3:0.53573 5:0.708246  
-204.8 1:0.255516 2:0.269543 3:0.309365 5:0.582808  
-204.8 1:0.574771 2:0.148907 3:0.592099 4:0.0674157 5:0.713037  
-204.8 1:0.314422 2:0.333296 3:0.502441 4:0.011236 5:0.696758  
-204.8 1:0.326259 2:0.161636 3:0.551265 5:0.667059  
-204.8 1:0.363662 2:0.120861 3:0.503773 5:0.735592  
-204.8 1:0.439168 2:0.109371 3:0.600533 5:0.75512  
-204.8 1:0.387336 2:0.145641 3:0.646249 5:0.701269  
-204.8 1:0.392239 2:0.1426 3:0.478029 5:0.699168  
-204.8 1:0.285984 2:0.267177 3:0.462938 5:0.716175  
-204.8 1:0.223576 2:0.11016 3:0.529072 5:0.744445  
-204.8 1:0.252574 2:0.148682 3:0.51842 5:0.71186  
-204.8 1:0.273027 2:0.11658 3:0.496227 4:0.011236 5:0.636127

-204.8 1:0.371787 2:0.194413 3:0.703506 5:0.700317  
-204.8 1:0.608391 2:0.168169 3:0.625832 4:0.0337079 5:0.688633  
-204.8 1:0.285914 2:0.153638 3:0.525965 4:0.0561798 5:0.659298  
-204.8 1:0.31218 2:0.195314 3:0.474922 5:0.630047  
-204.8 1:0.253835 2:0.199595 3:0.563249 4:0.0224719 5:0.642375  
-204.8 1:0.468236 2:0.30446 3:0.568575 5:0.718528  
-204.8 1:0.559992 2:0.217504 3:0.573014 4:0.0337079 5:0.719033  
-204.8 1:0.297682 2:0.215139 3:0.600533 4:0.011236 5:0.640161  
-204.8 1:0.415143 2:0.159495 3:0.592987 4:0.011236 5:0.73548  
-204.8 1:0.408489 2:0.407299 3:0.442077 5:0.738197  
-204.8 1:0.379351 2:0.231696 3:0.610297 5:0.722787  
-204.8 1:0.498004 2:0.142825 3:0.565468 5:0.704856  
-204.8 1:0.309379 2:0.186191 3:0.531292 5:0.704323  
-204.8 1:0.385795 2:0.240933 3:0.564137 4:0.011236 5:0.697207  
-204.8 1:0.382363 2:0.275175 3:0.496671 5:0.666134  
-204.8 1:0.315472 2:0.142036 3:0.726587 4:0.011236 5:0.712392  
-204.8 1:0.386146 2:0.147105 3:0.533955 5:0.711552  
-204.8 1:0.804861 2:0.186303 3:0.561474 4:0.0224719 5:0.6809  
-204.8 1:0.471177 2:0.194526 3:0.664004 5:0.742344  
-204.8 1:0.466485 2:0.111061 3:0.575677 5:0.712112  
-204.8 1:0.302585 2:0.114665 3:0.52996 5:0.726878  
-204.8 1:0.24634 2:0.178306 3:0.52996 5:0.61091  
-204.8 1:0.468025 2:0.235075 3:0.470928 4:0.011236 5:0.688829  
-204.8 1:0.237935 2:0.217617 3:0.368842 5:0.654563  
-204.8 1:0.303425 2:0.250394 3:0.530404 4:0.011236 5:0.564232  
-204.8 1:0.308958 2:0.260532 3:0.543276 5:0.589588  
-204.8 1:0.404147 2:0.163212 3:0.744785 5:0.752319  
-204.8 1:0.273937 2:0.205339 3:0.529516 4:0.011236 5:0.618503  
-204.8 1:0.267213 2:0.241834 3:0.685308 5:0.483651  
-204.8 1:0.357148 2:0.183713 3:0.584554 5:0.663529  
-204.8 1:0.371016 2:0.252872 3:0.473591 4:0.011236 5:0.734975  
-51.97387376343439 1:0.275128 2:0.253999 3:0.697736 5:0.654647  
-204.8 1:0.290327 2:0.197342 3:0.452286 5:0.705136  
-204.8 1:0.280311 2:0.162649 3:0.507767 5:0.602869  
-204.8 1:0.29481 2:0.239919 3:0.521083 5:0.56185

-204.8 1:0.26308 2:0.230007 3:0.596094 5:0.654199  
-204.8 1:0.599636 2:0.123451 3:0.580115 5:0.701465  
-204.8 1:0.306087 2:0.246677 3:0.575233 4:0.011236 5:0.636015  
-204.8 1:0.431533 2:0.307614 3:0.309809 4:0.011236 5:0.705836  
-204.8 1:0.337886 2:0.291845 3:0.608522 5:0.686448  
-204.8 1:0.667017 2:0.206916 3:0.56103 5:0.764591  
-204.8 1:0.313021 2:0.133814 3:0.48158 5:0.629795  
-204.8 1:0.382924 2:0.12852 3:0.507767 5:0.699308  
-204.8 1:0.32794 2:0.203649 3:0.570794 4:0.011236 5:0.678182  
-204.8 1:0.282132 2:0.144965 3:0.521083 5:0.56185  
-204.8 1:0.734678 2:0.24679 3:0.539281 4:0.011236 5:0.705612  
-204.8 1:0.31113 2:0.112638 3:0.462938 4:0.0337079 5:0.683338  
-204.8 1:0.34454 2:0.135841 3:0.652463 4:0.011236 5:0.715138  
-204.8 1:0.289417 2:0.218743 3:0.554816 4:0.011236 5:0.656356  
-204.8 1:0.448694 2:0.0985582 3:0.491345 4:0.0224719 5:0.72769  
-204.8 1:0.270645 2:0.184276 3:0.527741 5:0.68331  
-204.8 1:0.287876 2:0.155103 3:0.523302 5:0.651173  
-204.8 1:0.453246 2:0.262672 3:0.414558 4:0.0224719 5:0.674288  
-204.8 1:0.802339 2:0.200383 3:0.556147 5:0.691967  
-204.8 1:0.784759 2:0.43895 3:0.55881 5:0.730744  
-204.8 1:0.339427 2:0.252309 3:0.659121 4:0.0337079 5:0.545852  
-204.8 1:0.324018 2:0.194864 3:0.622725 4:0.0224719 5:0.704884  
-204.8 1:0.422428 2:0.300743 3:0.335996 5:0.610658  
-204.8 1:0.358689 2:0.146429 3:0.581447 4:0.011236 5:0.741644  
-204.8 1:0.282132 2:0.246565 3:0.475366 5:0.660839  
-204.8 1:0.296141 2:0.200834 3:0.572126 5:0.55168  
-204.8 1:0.293339 2:0.138319 3:0.622281 5:0.702614  
-204.8 1:0.462982 2:0.141473 3:0.591212 5:0.731389  
-73.3695230526161 1:0.29474 2:0.300631 3:0.778074 5:0.639601  
-204.8 1:0.271205 2:0.274611 3:0.414115 4:0.011236 5:0.649884  
-204.8 1:0.282202 2:0.14474 3:0.530404 5:0.694377  
-204.8 1:0.486167 2:0.393895 3:0.442077 5:0.667759  
-204.8 1:0.356167 2:0.219194 3:0.466933 4:0.0224719 5:0.668208  
-204.8 1:0.47559 2:0.191259 3:0.549046 5:0.708498  
-204.8 1:0.379772 2:0.246565 3:0.567688 4:0.0337079 5:0.64484



-204.8 1:0.32801 2:0.197229 3:0.524634 5:0.670701  
-204.8 1:0.70533 2:0.165916 3:0.565912 5:0.704127  
-204.8 1:0.499335 2:0.205114 3:0.517532 5:0.725001  
-204.8 1:0.732927 2:0.208943 3:0.557035 5:0.766496  
-204.8 1:0.445682 2:0.17549 3:0.537949 4:0.011236 5:0.722171  
-204.8 1:0.549555 2:0.132462 3:0.585885 5:0.716791  
-204.8 1:0.588149 2:0.172561 3:0.58988 5:0.728503  
-204.8 1:0.460531 2:0.295787 3:0.770528 4:0.0224719 5:0.738814  
-204.8 1:0.366814 2:0.278328 3:0.540169 5:0.684038  
-204.8 1:0.835049 2:0.386348 3:0.608966 5:0.678322  
-204.8 1:0.635638 2:0.358189 3:0.45051 5:0.684766  
-204.8 1:0.338376 2:0.1836 3:0.604083 4:0.011236 5:0.668936  
-204.8 1:0.26196 2:0.242622 3:0.494008 5:0.730296  
-204.8 1:0.298032 2:0.15882 3:0.395917 4:0.011236 5:0.692219  
-204.8 1:0.694894 2:0.109822 3:0.436751 4:0.0224719 5:0.738758  
-204.8 1:0.681376 2:0.0491102 3:0.631602 5:0.725869  
-204.8 1:0.40933 2:0.153638 3:0.707945 5:0.745342  
-204.8 1:0.286965 2:0.278666 3:0.478917 4:0.011236 5:0.653722  
-204.8 1:0.842544 2:0.115454 3:0.65202 5:0.708582  
-204.8 1:0.776143 2:0.297702 3:0.583222 4:0.011236 5:0.718893  
-204.8 1:0.253274 2:0.227191 3:0.652463 5:0.677594  
-204.8 1:0.317153 2:0.265938 3:0.530848 5:0.671822  
-204.8 1:0.633677 2:0.12897 3:0.640923 5:0.72091  
-204.8 1:0.399314 2:0.225727 3:0.522858 5:0.700373  
-204.8 1:0.632976 2:0.145754 3:0.575233 4:0.011236 5:0.716763  
-204.8 1:0.647125 2:0.381955 3:0.55304 5:0.722703  
-204.8 1:0.781957 2:0.133814 3:0.524634 5:0.745538  
-204.8 1:0.467955 2:0.191597 3:0.63249 5:0.746211  
-204.8 1:0.706171 2:0.231021 3:0.528185 5:0.725113  
-204.8 1:0.487988 2:0.229894 3:0.439858 5:0.734219  
-204.8 1:0.400644 2:0.138432 3:0.488238 5:0.697739  
-204.8 1:0.309449 2:0.274499 3:0.474922 4:0.011236 5:0.63156  
-204.8 1:0.303005 2:0.203199 3:0.480249 4:0.011236 5:0.653218  
-204.8 1:0.297542 2:0.174138 3:0.539281 4:0.0449438 5:0.732566  
-204.8 1:0.522519 2:0.251183 3:0.460719 4:0.0786517 5:0.727578

-204.8 1:0.422778 2:0.157806 3:0.467377 5:0.686784  
-204.8 1:0.269314 2:0.191485 3:0.562361 4:0.011236 5:0.564232  
-204.8 1:0.50816 2:0.160734 3:0.562361 5:0.705696  
-204.8 1:0.332703 2:0.222573 3:0.617399 5:0.678658  
-204.8 1:0.338306 2:0.338364 3:0.600533 5:0.70805  
-204.8 1:0.517686 2:0.161185 3:0.545051 4:0.0337079 5:0.684991  
-204.8 1:0.730826 2:0.272471 3:0.557479 5:0.755485  
-204.8 1:0.417595 2:0.164789 3:0.466045 5:0.725281  
-204.8 1:0.70526 2:0.368439 3:0.537949 5:0.679219  
-204.8 1:0.80269 2:0.225727 3:0.332002 5:0.66011  
-204.8 1:0.476921 2:0.165127 3:0.543276 5:0.756073  
-204.8 1:0.407298 2:0.181572 3:0.478029 5:0.692331  
-204.8 1:0.510752 2:0.250169 3:0.559254 4:0.011236 5:0.709871  
-204.8 1:0.388527 2:0.211534 3:0.437639 5:0.645849  
-204.8 1:0.625271 2:0.174251 3:0.580115 5:0.748144  
-204.8 1:0.616866 2:0.179432 3:0.507767 5:0.747303  
-204.8 1:0.457519 2:0.1631 3:0.643142 5:0.743857  
-204.8 1:0.775303 2:0.130773 3:0.556147 5:0.679359  
-204.8 1:0.476361 2:0.289705 3:0.474035 4:0.011236 5:0.697739  
-204.8 1:0.299573 2:0.233048 3:0.502885 5:0.686476  
-204.8 1:0.292849 2:0.20027 3:0.753662 5:0.728727  
-204.8 1:0.276809 2:0.127957 3:0.529072 4:0.011236 5:0.743269  
-204.8 1:0.465084 2:0.125028 3:0.480692 5:0.728755  
-204.8 1:0.296631 2:0.127281 3:0.442521 4:0.011236 5:0.681769  
-204.8 1:0.608741 2:0.159608 3:0.541056 4:0.0224719 5:0.710795  
-204.8 1:0.288786 2:0.186979 3:0.561474 5:0.650444  
-204.8 1:0.521188 2:0.217504 3:0.549933 5:0.726121  
-204.8 1:0.856973 2:0.254111 3:0.567244 5:0.757026  
-204.8 1:0.52539 2:0.181122 3:0.527297 5:0.716007  
-204.8 1:0.42593 2:0.203424 3:0.501997 5:0.729904  
-204.8 1:0.326679 2:0.0885335 3:0.590324 4:0.0224719 5:0.71752  
-204.8 1:0.516075 2:0.22674 3:0.451842 5:0.715839  
-204.8 1:0.274427 2:0.136292 3:0.531735 5:0.753495  
-204.8 1:0.591581 2:0.168056 3:0.484687 4:0.0224719 5:0.7424  
-204.8 1:0.277509 2:0.180108 3:0.590324 5:0.642487

-204.8 1:0.272046 2:0.17977 3:0.471815 5:0.633941  
-204.8 1:0.405968 2:0.170534 3:0.614292 4:0.011236 5:0.688437  
-204.8 1:0.925895 2:0.184726 3:0.45273 5:0.714466  
-204.8 1:0.276809 2:0.227754 3:0.466489 4:0.011236 5:0.723628  
-204.8 1:0.529943 2:0.128182 3:0.635153 5:0.738057  
-204.8 1:0.450235 2:0.363257 3:0.47581 5:0.755569  
-204.8 1:0.432234 2:0.27157 3:0.596094 4:0.011236 5:0.719201  
-204.8 1:0.315683 2:0.277315 3:0.457168 4:0.011236 5:0.731529  
-204.8 1:0.304336 2:0.284636 3:0.462494 4:0.011236 5:0.73251  
-204.8 1:0.424249 2:0.254224 3:0.517532 4:0.0224719 5:0.730885  
-204.8 1:0.300063 2:0.12683 3:0.549933 5:0.720126  
-204.8 1:0.558731 2:0.207029 3:0.354194 5:0.691659  
-204.8 1:0.373398 2:0.34287 3:0.565468 5:0.725393  
-204.8 1:0.24634 2:0.109146 3:0.441633 5:0.711412  
-204.8 1:0.326819 2:0.26301 3:0.486462 4:0.0786517 5:0.666078  
-204.8 1:0.441409 2:0.104077 3:0.605415 5:0.711104  
-204.8 1:0.256496 2:0.152174 3:0.485131 4:0.011236 5:0.586955  
-204.8 1:0.55803 2:0.12255 3:0.473147 5:0.749349  
-204.8 1:0.29551 2:0.142825 3:0.638704 4:0.011236 5:0.710403  
-204.8 1:0.380332 2:0.156454 3:0.55526 4:0.0224719 5:0.703287  
-204.8 1:0.321776 2:0.140572 3:0.419441 4:0.011236 5:0.663248  
-204.8 1:0.404427 2:0.16524 3:0.451842 4:0.0224719 5:0.724636  
-204.8 1:0.460041 2:0.307614 3:0.449623 4:0.011236 5:0.684991  
-204.8 1:0.266583 2:0.168506 3:0.542832 4:0.011236 5:0.606624  
-204.8 1:0.52392 2:0.087745 3:0.62095 5:0.750778  
-204.8 1:0.335995 2:0.337801 3:0.456281 5:0.686924  
-204.8 1:0.352945 2:0.207254 3:0.537062 5:0.664397  
-204.8 1:0.628073 2:0.239243 3:0.583666 5:0.742792  
-204.8 1:0.287665 2:0.200158 3:0.710608 5:0.696506  
-204.8 1:0.292498 2:0.136405 3:0.439858 5:0.632765  
-204.8 1:0.330181 2:0.216265 3:0.444296 5:0.623042  
-204.8 1:0.364642 2:0.273372 3:0.557035 5:0.667423  
-204.8 1:0.303915 2:0.255913 3:0.440746 5:0.667423  
-204.8 1:0.519437 2:0.120297 3:0.634265 4:0.011236 5:0.701073  
-204.8 1:0.314422 2:0.176842 3:0.557479 5:0.484548

-204.8 1:0.357148 2:0.156679 3:0.629827 5:0.706733  
-204.8 1:0.267773 2:0.181347 3:0.600533 4:0.011236 5:0.632372  
-204.8 1:0.310359 2:0.155328 3:0.711052 5:0.715474  
-204.8 1:0.320235 2:0.315499 3:0.494008 5:0.676893  
-204.8 1:0.281152 2:0.1221 3:0.559254 4:0.0337079 5:0.715026  
-204.8 1:0.921552 2:0.0808741 3:0.514425 4:0.011236 5:0.673503  
-204.8 1:0.263501 2:0.188331 3:0.424767 4:0.0786517 5:0.714186  
-204.8 1:0.294249 2:0.166929 3:0.328895 4:0.0224719 5:0.654143  
-204.8 1:0.340898 2:0.146542 3:0.679538 4:0.0224719 5:0.645009  
-204.8 1:0.309309 2:0.302884 3:0.483799 5:0.688521  
-204.8 1:0.433635 2:0.260644 3:0.399911 4:0.011236 5:0.646017  
-204.8 1:0.265742 2:0.28182 3:0.468265 4:0.011236 5:0.720826  
-204.8 1:0.331792 2:0.302433 3:0.727031 5:0.758651  
-204.8 1:0.307768 2:0.118946 3:0.646249 5:0.75456  
-204.8 1:0.275618 2:0.136855 3:0.634265 4:0.0337079 5:0.6375  
-204.8 1:0.281292 2:0.228768 3:0.403462 5:0.65333  
-204.8 1:0.357918 2:0.16907 3:0.533511 4:0.0224719 5:0.667675  
-204.8 1:0.338657 2:0.179207 3:0.548158 4:0.0337079 5:0.73377  
-204.8 1:0.373818 2:0.202861 3:0.414558 4:0.0224719 5:0.73335  
-204.8 1:0.500525 2:0.277878 3:0.570794 5:0.722703  
-204.8 1:0.68887 2:0.103176 3:0.46427 5:0.712617  
-204.8 1:0.533656 2:0.122212 3:0.576565 4:0.011236 5:0.783055  
-204.8 1:0.337326 2:0.247804 3:0.580559 5:0.73237  
-204.8 1:0.333684 2:0.186303 3:0.559698 4:0.0224719 5:0.631784  
-204.8 1:0.280101 2:0.221559 3:0.60719 5:0.663108  
-204.8 1:0.305316 2:0.148795 3:0.490457 4:0.011236 5:0.698467  
-204.8 1:0.637459 2:0.3574 3:0.381269 5:0.708806  
-204.8 1:0.291168 2:0.167831 3:0.731025 4:0.0224719 5:0.674176  
-204.8 1:0.288086 2:0.196103 3:0.671549 4:0.011236 5:0.669693  
-204.8 1:0.332283 2:0.184726 3:0.526853 5:0.700905  
-204.8 1:0.321006 2:0.262221 3:0.62672 5:0.667423  
-204.8 1:0.301464 2:0.228542 3:0.33067 5:0.667423  
-204.8 1:0.683827 2:0.164677 3:0.592543 4:0.011236 5:0.724552  
-204.8 1:0.31092 2:0.249944 3:0.426099 4:0.011236 5:0.628394  
-204.8 1:0.277719 2:0.267177 3:0.629827 4:0.146067 5:0.682777

-204.8 1:0.706451 2:0.176729 3:0.584998 5:0.73985  
-204.8 1:0.330251 2:0.155328 3:0.592099 4:0.0561798 5:0.739458  
-204.8 1:0.670869 2:0.0791845 3:0.556591 5:0.747667  
-204.8 1:0.574841 2:0.201735 3:0.668886 4:0.011236 5:0.736236  
-204.8 1:0.254465 2:0.264699 3:0.516644 5:0.608052  
-204.8 1:0.305736 2:0.226515 3:0.563249 5:0.669244  
-204.8 1:0.366814 2:0.208042 3:0.581447 5:0.67723  
-204.8 1:0.467885 2:0.191935 3:0.600976 5:0.718725  
-204.8 1:0.251523 2:0.303447 3:0.542388 5:0.71752  
-204.8 1:0.559922 2:0.127844 3:0.571238 4:0.0224719 5:0.761901  
-204.8 1:0.535407 2:0.202636 3:0.69818 5:0.744277  
-204.8 1:0.332703 2:0.233386 3:0.745229 5:0.714298  
-204.8 1:0.455348 2:0.340505 3:0.466489 4:0.011236 5:0.730885  
-204.8 1:0.404427 2:0.281257 3:0.634265 5:0.716791  
-204.8 1:0.505078 2:0.075918 3:0.482024 5:0.759996  
-204.8 1:0.675842 2:0.396824 3:0.608078 5:0.759996  
-204.8 1:0.610913 2:0.184163 3:0.579228 5:0.755597  
-204.8 1:0.431323 2:0.136968 3:0.416778 5:0.740719  
-204.8 1:0.370946 2:0.200721 3:0.575677 5:0.664593  
-204.8 1:0.479162 2:0.208606 3:0.498003 5:0.719313  
-204.8 1:0.337816 2:0.197004 3:0.71549 4:0.011236 5:0.691743  
-204.8 1:0.269174 2:0.162762 3:0.538837 5:0.693508  
-204.8 1:0.764236 2:0.123564 3:0.608078 5:0.757586  
-204.8 1:0.367724 2:0.160622 3:0.445628 5:0.687736  
-204.8 1:0.744554 2:0.0801982 3:0.576121 5:0.738225  
-204.8 1:0.781887 2:0.34501 3:0.581447 5:0.698916  
-204.8 1:0.482805 2:0.105204 3:0.457612 5:0.757782  
-204.8 1:0.292358 2:0.317864 3:0.624945 5:0.7062  
-204.8 1:0.476781 2:0.124578 3:0.482912 5:0.751506  
-204.8 1:0.432304 2:0.230119 3:0.498003 4:0.011236 5:0.673699  
-204.8 1:0.614555 2:0.131111 3:0.598757 5:0.701073  
-204.8 1:0.729985 2:0.437486 3:0.517532 5:0.695918  
-204.8 1:0.322477 2:0.23485 3:0.470484 4:0.011236 5:0.486621  
-204.8 1:0.472298 2:0.198919 3:0.630271 4:0.011236 5:0.710795  
-204.8 1:0.460671 2:0.318765 3:0.592543 5:0.720602

-204.8 1:0.423408 2:0.246677 3:0.574345 4:0.0224719 5:0.747499  
-204.8 1:0.59018 2:0.161748 3:0.560586 5:0.716091  
-204.8 1:0.507109 2:0.198468 3:0.608078 5:0.702362  
-204.8 1:0.646564 2:0.369227 3:0.53573 5:0.696226  
-204.8 1:0.675352 2:0.256815 3:0.521971 5:0.713401  
-204.8 1:0.403306 2:0.254449 3:0.543276 5:0.693144  
-204.8 1:0.613294 2:0.164001 3:0.504217 4:0.011236 5:0.722731  
-204.8 1:0.437207 2:0.255688 3:0.53573 4:0.011236 5:0.703118  
-204.8 1:0.40975 2:0.300743 3:0.537949 4:0.0449438 5:0.743801  
-204.8 1:0.326679 2:0.125141 3:0.611185 5:0.707966  
-204.8 1:0.6065 2:0.0959676 3:0.565912 5:0.750441  
-204.8 1:0.284373 2:0.153751 3:0.517532 4:0.011236 5:0.709591  
-204.8 1:0.666527 2:0.357626 3:0.445628 5:0.732622  
-204.8 1:0.272886 2:0.171998 3:0.63826 5:0.731053  
-204.8 1:0.629054 2:0.107569 3:0.528185 5:0.731977  
-204.8 1:0.250123 2:0.125817 3:0.472703 4:0.011236 5:0.6693  
-204.8 1:0.288716 2:0.209394 3:0.547714 5:0.703679  
-204.8 1:0.297962 2:0.327213 3:0.47581 5:0.742372  
-204.8 1:0.535196 2:0.203199 3:0.602752 4:0.011236 5:0.72996  
-204.8 1:0.274497 2:0.257603 3:0.576565 5:0.754084  
-204.8 1:0.254956 2:0.251295 3:0.527741 5:0.717352  
-204.8 1:0.535547 2:0.119396 3:0.603196 5:0.726906  
-204.8 1:0.479933 2:0.288804 3:0.662672 4:0.011236 5:0.749657  
-204.8 1:0.273307 2:0.167267 3:0.579672 4:0.011236 5:0.678182  
-204.8 1:0.287455 2:0.150597 3:0.562361 5:0.728083  
-204.8 1:0.400084 2:0.209507 3:0.618287 4:0.011236 5:0.669356  
-204.8 1:0.342929 2:0.0642036 3:0.536618 5:0.772071  
-204.8 1:0.531274 2:0.222573 3:0.616067 5:0.709395  
-204.8 1:0.662394 2:0.156229 3:0.598313 5:0.711692  
-204.8 1:0.364502 2:0.129759 3:0.450954 4:0.011236 5:0.713317  
-204.8 1:0.609302 2:0.114215 3:0.550377 5:0.706901  
-204.8 1:0.603278 2:0.139671 3:0.491345 5:0.747331  
-204.8 1:0.594873 2:0.144965 3:0.457168 4:0.011236 5:0.749489  
-204.8 1:0.281712 2:0.212886 3:0.636041 4:0.011236 5:0.608977  
-204.8 1:0.288016 2:0.342194 3:0.519308 5:0.727718

-204.8 1:0.522239 2:0.121536 3:0.635597 4:0.0337079 5:0.765123  
-204.8 1:0.588919 2:0.143951 3:0.664004 5:0.745958  
-204.8 1:0.307207 2:0.169971 3:0.52996 5:0.743213  
-204.8 1:0.45885 2:0.157243 3:0.567244 5:0.759996  
-204.8 1:0.660853 2:0.156342 3:0.458056 5:0.733939  
-204.8 1:0.677874 2:0.236427 3:0.554816 5:0.734191  
-204.8 1:0.49205 2:0.241496 3:0.519751 4:0.011236 5:0.712925  
-204.8 1:0.259578 2:0.243749 3:0.528185 5:0.69603  
-204.8 1:0.256987 2:0.142938 3:0.586329 5:0.716623  
-204.8 1:0.286545 2:0.205452 3:0.531735 5:0.734723  
-204.8 1:0.577362 2:0.180559 3:0.457168 4:0.011236 5:0.758791  
-204.8 1:0.537648 2:0.243185 3:0.499778 4:0.011236 5:0.71794  
-204.8 1:0.467185 2:0.170872 3:0.443409 4:0.011236 5:0.738674  
-204.8 1:0.593612 2:0.321356 3:0.607634 4:0.011236 5:0.710431  
-204.8 1:0.795966 2:0.271795 3:0.532623 4:0.0224719 5:0.742764  
-204.8 1:0.259088 2:0.176504 3:0.501553 5:0.770839  
-204.8 1:0.31099 2:0.255238 3:0.483799 5:0.6013  
-204.8 1:0.374588 2:0.215589 3:0.54949 5:0.720266  
-204.8 1:0.313021 2:0.128182 3:0.554372 4:0.011236 5:0.749405  
-204.8 1:0.699517 2:0.350079 3:0.561917 4:0.0449438 5:0.759407  
-204.8 1:0.273097 2:0.0853796 3:0.565024 4:0.011236 5:0.736348  
-204.8 1:0.735939 2:0.396486 3:0.407457 5:0.676053  
-204.8 1:0.500315 2:0.138319 3:0.618731 5:0.700345  
-204.8 1:0.473209 2:0.249268 3:0.610297 5:0.761873  
-204.8 1:0.625412 2:0.378126 3:0.435863 4:0.011236 5:0.74862  
-204.8 1:0.407018 2:0.316963 3:0.546383 4:0.011236 5:0.704043  
-204.8 1:0.279751 2:0.257716 3:0.473591 5:0.701746  
-204.8 1:0.492961 2:0.310092 3:0.471815 4:0.011236 5:0.753271  
-204.8 1:0.50823 2:0.183938 3:0.55881 5:0.730044  
-204.8 1:0.39287 2:0.168732 3:0.419441 5:0.625648  
-204.8 1:0.600756 2:0.103514 3:0.575233 5:0.718725  
-204.8 1:0.626322 2:0.167493 3:0.551709 4:0.011236 5:0.711804  
-204.8 1:0.603278 2:0.23271 3:0.620506 5:0.764422  
-204.8 1:0.506759 2:0.490088 3:0.491345 5:0.698916  
-204.8 1:0.283673 2:0.102388 3:0.525078 4:0.0337079 5:0.727831

-204.8 1:0.27835 2:0.154314 3:0.555704 5:0.775181  
-204.8 1:0.645304 2:0.294436 3:0.598313 5:0.741531  
-204.8 1:0.382363 2:0.162649 3:0.592543 5:0.69348  
-204.8 1:0.478462 2:0.23913 3:0.494008 5:0.716455  
-204.8 1:0.81887 2:0.206128 3:0.616067 5:0.773164  
-204.8 1:0.368355 2:0.137756 3:0.586329 5:0.746126  
-204.8 1:0.497233 2:0.176729 3:0.523746 5:0.74806  
-204.8 1:0.713946 2:0.335999 3:0.536618 4:0.011236 5:0.707013  
-204.8 1:0.506619 2:0.201735 3:0.718597 4:0.0786517 5:0.691267  
-204.8 1:0.641661 2:0.2344 3:0.586329 5:0.730829  
-204.8 1:0.554388 2:0.245438 3:0.584554 5:0.726794  
-204.8 1:0.495132 2:0.182924 3:0.456724 5:0.72402  
-204.8 1:0.626602 2:0.0671322 3:0.540613 5:0.768009  
-136.0409656070955 1:0.488618 2:0.15713 3:0.569463 5:0.701241  
-204.8 1:0.661273 2:0.102726 3:0.552597 5:0.728419  
-204.8 1:0.308398 2:0.2344 3:0.581447 5:0.758651  
-204.8 1:0.70554 2:0.356837 3:0.593875 5:0.742092  
-204.8 1:0.446312 2:0.228205 3:0.76964 5:0.737581  
-204.8 1:0.706311 2:0.186528 3:0.584998 5:0.753691  
-204.8 1:0.503467 2:0.212661 3:0.559254 4:0.0449438 5:0.726234  
-204.8 1:0.65602 2:0.317526 3:0.574789 5:0.749012  
-204.8 1:0.29432 2:0.300405 3:0.442521 4:0.011236 5:0.657897  
-204.8 1:0.55726 2:0.216715 3:0.581003 5:0.726177  
-204.8 1:0.352945 2:0.236202 3:0.751886 5:0.73915  
-193.8101943069528 1:0.507039 2:0.282383 3:0.52996 5:0.70805  
-204.8 1:0.588639 2:0.0921379 3:0.632046 5:0.73321  
-204.8 1:0.565595 2:0.285763 3:0.450954 4:0.011236 5:0.752935  
-204.8 1:0.582966 2:0.167493 3:0.582779 4:0.0224719 5:0.710992  
-204.8 1:0.385095 2:0.14519 3:0.632046 5:0.722339  
-204.8 1:0.560622 2:0.123339 3:0.530404 4:0.0224719 5:0.721835  
-204.8 1:0.449884 2:0.0990088 3:0.77186 4:0.0898876 5:0.713401  
-204.8 1:0.695594 2:0.401442 3:0.457612 5:0.785856  
-204.8 1:0.548014 2:0.182586 3:0.514425 5:0.774901  
-204.8 1:0.323878 2:0.139784 3:0.585885 4:0.0337079 5:0.739346  
-204.8 1:0.579253 2:0.153075 3:0.584998 4:0.011236 5:0.710011



-204.8 1:0.448133 2:0.168394 3:0.560142 5:0.719005  
-204.8 1:0.296351 2:0.193512 3:0.537949 5:0.705584  
-204.8 1:0.582826 2:0.122325 3:0.645362 5:0.700933  
-204.8 1:0.532745 2:0.107344 3:0.529516 5:0.743129  
-204.8 1:0.484486 2:0.221559 3:0.547714 5:0.730212  
-204.8 1:0.302304 2:0.143726 3:0.404794 5:0.730997  
-204.8 1:0.304126 2:0.137531 3:0.573458 5:0.683169  
-204.8 1:0.615535 2:0.124916 3:0.559254 4:0.011236 5:0.771847  
-204.8 1:0.399524 2:0.218743 3:0.490457 4:0.011236 5:0.728111  
-204.8 1:0.503257 2:0.201622 3:0.543276 5:0.71511  
-204.8 1:0.303845 2:0.113426 3:0.548158 4:0.0337079 5:0.73265  
-204.8 1:0.302725 2:0.271458 3:0.455393 5:0.678855  
-204.8 1:0.282132 2:0.265375 3:0.577896 5:0.679303  
-204.8 1:0.275898 2:0.428475 3:0.572126 5:0.780981  
-204.8 1:0.498984 2:0.166929 3:0.31913 5:0.727971  
-204.8 1:0.377951 2:0.265488 3:0.380382 4:0.011236 5:0.758595  
-204.8 1:0.437347 2:0.0858301 3:0.514869 5:0.741924  
-204.8 1:0.423548 2:0.188105 3:0.662672 5:0.688045  
-204.8 1:0.234853 2:0.211759 3:0.394141 4:0.011236 5:0.759771  
-204.8 1:0.272606 2:0.194638 3:0.576121 5:0.681965  
-204.8 1:0.277719 2:0.135616 3:0.559698 5:0.747527  
-204.8 1:0.625412 2:0.192836 3:0.625388 5:0.765375  
-204.8 1:0.454157 2:0.241721 3:0.602308 4:0.0224719 5:0.651705  
-204.8 1:0.26252 2:0.164564 3:0.522858 5:0.66577  
-204.8 1:0.860195 2:0.212548 3:0.562805 5:0.749545  
-204.8 1:0.577642 2:0.239694 3:0.634709 4:0.0674157 5:0.686083  
-204.8 1:0.275968 2:0.170759 3:0.446072 5:0.69631  
-204.8 1:0.498774 2:0.238229 3:0.576565 5:0.786949  
-204.8 1:0.799538 2:0.197454 3:0.587217 5:0.735395  
-204.8 1:0.299993 2:0.306601 3:0.541944 4:0.011236 5:0.669721  
-204.8 1:0.271766 2:0.123789 3:0.494452 5:0.727354  
-204.8 1:0.691812 2:0.085267 3:0.458056 4:0.011236 5:0.752403  
-204.8 1:0.270085 2:0.124352 3:0.516644 5:0.657729  
-204.8 1:0.70421 2:0.153638 3:0.483356 5:0.722115  
-204.8 1:0.501366 2:0.129984 3:0.55526 4:0.0224719 5:0.737161

-204.8 1:0.32731 2:0.152174 3:0.647581 4:0.0224719 5:0.663389  
-204.8 1:0.887511 2:0.11185 3:0.621394 5:0.769774  
-204.8 1:0.489038 2:0.119622 3:0.68664 5:0.761817  
-204.8 1:0.324298 2:0.119734 3:0.68664 4:0.0224719 5:0.761621  
-204.8 1:0.371086 2:0.152061 3:0.534399 5:0.743269  
-204.8 1:0.422918 2:0.144289 3:0.636485 5:0.722675  
-204.8 1:0.329761 2:0.182136 3:0.566356 4:0.011236 5:0.66182  
-204.8 1:0.330251 2:0.168732 3:0.658233 4:0.011236 5:0.776863  
-204.8 1:0.275968 2:0.188556 3:0.569463 5:0.662968  
-204.8 1:0.251243 2:0.224262 3:0.675544 4:0.011236 5:0.628954  
-204.8 1:0.256356 2:0.162649 3:0.565912 5:0.742176  
-204.8 1:0.488478 2:0.270106 3:0.641367 4:0.0224719 5:0.748816  
-204.8 1:0.26266 2:0.252422 3:0.521971 5:0.615982  
-204.8 1:0.637109 2:0.19216 3:0.42166 4:0.011236 5:0.743549  
-204.8 1:0.543251 2:0.0777202 3:0.574789 5:0.753439  
-204.8 1:0.433705 2:0.237328 3:0.395029 4:0.0224719 5:0.73688  
-204.8 1:0.265112 2:0.221784 3:0.560586 5:0.71228  
-204.8 1:0.663165 2:0.30998 3:0.593431 4:0.011236 5:0.685915  
-204.8 1:0.386216 2:0.170984 3:0.690191 5:0.7612  
-204.8 1:0.273027 2:0.166254 3:0.515313 5:0.780421  
-204.8 1:0.277229 2:0.131111 3:0.487794 5:0.647222  
-204.8 1:0.269454 2:0.237103 3:0.583222 5:0.53753  
-204.8 1:0.679274 2:0.343321 3:0.607634 5:0.758707  
-204.8 1:0.625832 2:0.184726 3:0.604527 5:0.746547  
-204.8 1:0.378581 2:0.16952 3:0.623169 5:0.742876  
-204.8 1:0.312881 2:0.403469 3:0.452286 5:0.717912  
-204.8 1:0.250543 2:0.192836 3:0.446072 4:0.011236 5:0.663276  
-204.8 1:0.674792 2:0.23226 3:0.523302 4:0.011236 5:0.715503  
-204.8 1:0.259368 2:0.130998 3:0.494896 5:0.696842  
-204.8 1:0.446662 2:0.243523 3:0.568131 5:0.736544  
-204.8 1:0.487147 2:0.278666 3:0.608522 4:0.0224719 5:0.731137  
-204.8 1:0.763396 2:0.362018 3:0.524634 5:0.755989  
-204.8 1:0.275688 2:0.194301 3:0.596538 5:0.637808  
-204.8 1:0.618127 2:0.290043 3:0.474922 5:0.733686  
-204.8 1:0.531344 2:0.275062 3:0.521527 4:0.011236 5:0.723572

-204.8 1:0.488898 2:0.235639 3:0.477585 4:0.0224719 5:0.702166  
-204.8 1:0.552987 2:0.180108 3:0.608966 5:0.72727  
-204.8 1:0.762765 2:0.186416 3:0.681758 4:0.0224719 5:0.754168  
-204.8 1:0.300763 2:0.168394 3:0.792277 5:0.760808  
-204.8 1:0.55663 2:0.0782834 3:0.578784 4:0.011236 5:0.698103  
-204.8 1:0.304826 2:0.193737 3:0.716822 5:0.751702  
-204.8 1:0.484065 2:0.112976 3:0.556591 4:0.0224719 5:0.736516  
-204.8 1:0.765147 2:0.0927011 3:0.513094 5:0.760304  
-204.8 1:0.703859 2:0.0984456 3:0.577452 5:0.709535  
-204.8 1:0.595503 2:0.27157 3:0.545495 4:0.0561798 5:0.716119  
-204.8 1:0.637599 2:0.18191 3:0.542832 5:0.746631  
-204.8 1:0.687049 2:0.0947285 3:0.659121 4:0.011236 5:0.710487  
-204.8 1:0.412552 2:0.218968 3:0.538393 5:0.778992  
-204.8 1:0.47524 2:0.142487 3:0.569463 4:0.011236 5:0.723516  
-204.8 1:0.338166 2:0.217617 3:0.49534 5:0.694601  
-204.8 1:0.480003 2:0.207479 3:0.578784 5:0.723404  
-204.8 1:0.471878 2:0.156792 3:0.40213 4:0.011236 5:0.706481  
-204.8 1:0.648666 2:0.121086 3:0.470928 4:0.011236 5:0.739178  
-204.8 1:0.425089 2:0.133814 3:0.511318 5:0.727887  
-204.8 1:0.462632 2:0.226515 3:0.454505 4:0.011236 5:0.762629  
-204.8 1:0.349233 2:0.321131 3:0.535286 5:0.763694  
-204.8 1:0.481194 2:0.163438 3:0.627164 5:0.750161  
-204.8 1:0.284233 2:0.199595 3:0.573014 5:0.718641  
-204.8 1:0.620018 2:0.153638 3:0.656902 4:0.0224719 5:0.678911  
-204.8 1:0.554949 2:0.159045 3:0.673324 4:0.0337079 5:0.707461  
-204.8 1:0.272886 2:0.105542 3:0.608078 5:0.735676  
-204.8 1:0.562723 2:0.160284 3:0.542388 4:0.011236 5:0.744838  
-204.8 1:0.4592 2:0.314485 3:0.482024 5:0.71399  
-204.8 1:0.67185 2:0.196328 3:0.562361 5:0.72629  
-204.8 1:0.550956 2:0.172111 3:0.556147 5:0.756409  
-204.8 1:0.270295 2:0.274499 3:0.571238 5:0.705108  
-204.8 1:0.566996 2:0.242397 3:0.472259 4:0.0449438 5:0.733602  
-204.8 1:0.252784 2:0.124014 3:0.588992 5:0.739766  
-204.8 1:0.316243 2:0.261433 3:0.50111 5:0.707097  
-204.8 1:0.610422 2:0.265375 3:0.55881 4:0.011236 5:0.758819

-204.8 1:0.649156 2:0.400879 3:0.553928 4:0.011236 5:0.65277  
-204.8 1:0.312741 2:0.170759 3:0.477585 5:0.733574  
-204.8 1:0.513063 2:0.121987 3:0.294274 5:0.776218  
-204.8 1:0.456328 2:0.333634 3:0.422992 5:0.706088  
-204.8 1:0.288506 2:0.21818 3:0.564581 5:0.709983  
-204.8 1:0.435806 2:0.173125 3:0.622281 4:0.011236 5:0.748508  
-204.8 1:0.358128 2:0.147781 3:0.580115 5:0.709367  
-204.8 1:0.561603 2:0.120748 3:0.60142 4:0.011236 5:0.749601  
-204.8 1:0.436156 2:0.158707 3:0.635597 5:0.696534  
-204.8 1:0.580164 2:0.17121 3:0.683089 5:0.723039  
-204.8 1:0.414443 2:0.13663 3:0.524634 4:0.011236 5:0.737161  
-204.8 1:0.708342 2:0.336112 3:0.624057 5:0.762265  
-204.8 1:0.820691 2:0.231922 3:0.575677 4:0.011236 5:0.693144  
-204.8 1:0.659662 2:0.209056 3:0.582335 5:0.75187  
-204.8 1:0.302374 2:0.193737 3:0.618287 5:0.673027  
-204.8 1:0.613294 2:0.220433 3:0.624501 4:0.011236 5:0.769522  
-204.8 1:0.365833 2:0.277991 3:0.761651 5:0.725925  
-204.8 1:0.346081 2:0.160509 3:0.650244 4:0.0224719 5:0.702222  
-204.8 1:0.300693 2:0.275738 3:0.636041 5:0.718416  
-204.8 1:0.256847 2:0.152287 3:0.509543 5:0.675128  
-204.8 1:0.545283 2:0.234174 3:0.629383 4:0.011236 5:0.735003  
-204.8 1:0.412061 2:0.399414 3:0.522858 4:0.0449438 5:0.676193  
-204.8 1:0.364012 2:0.130998 3:0.537062 4:0.011236 5:0.68981  
-204.8 1:0.674091 2:0.324961 3:0.432756 5:0.687512  
-204.8 1:0.292428 2:0.206916 3:0.526409 4:0.011236 5:0.747611  
-204.8 1:0.578553 2:0.201397 3:0.33067 5:0.764254  
-204.8 1:0.747986 2:0.219531 3:0.441633 5:0.750497  
-204.8 1:0.284514 2:0.145866 3:0.527741 5:0.724468  
-204.8 1:0.263851 2:0.128858 3:0.570794 5:0.760052  
-204.8 1:0.547034 2:0.181009 3:0.56103 5:0.749096  
-204.8 1:0.695734 2:0.21818 3:0.508211 4:0.011236 5:0.722171  
-204.8 1:0.411011 2:0.164226 3:0.575677 5:0.746575  
-204.8 1:0.312881 2:0.207254 3:0.56103 5:0.724973  
-204.8 1:0.602788 2:0.101825 3:0.639592 5:0.6939  
-204.8 1:0.275898 2:0.216941 3:0.586329 5:0.763526

-204.8 1:0.772921 2:0.0531651 3:0.488682 5:0.709703  
-204.8 1:0.284023 2:0.217842 3:0.538837 5:0.767813  
-204.8 1:0.437487 2:0.181798 3:0.656902 5:0.708806  
-204.8 1:0.258878 2:0.358414 3:0.403462 5:0.676501  
-204.8 1:0.793794 2:0.122888 3:0.414558 5:0.769438  
-204.8 1:0.285144 2:0.090223 3:0.516644 5:0.753411  
-204.8 1:0.401345 2:0.310318 3:0.568131 5:0.733154  
-204.8 1:0.608671 2:0.123789 3:0.533955 4:0.011236 5:0.738618  
-204.8 1:0.633887 2:0.175941 3:0.606747 5:0.766664  
-204.8 1:0.31134 2:0.164564 3:0.488682 5:0.657925  
-204.8 1:0.287806 2:0.256477 3:0.577896 5:0.698047  
-204.8 1:0.450025 2:0.197004 3:0.514869 5:0.720182  
-204.8 1:0.505919 2:0.126042 3:0.628495 5:0.723768  
-204.8 1:0.421587 2:0.221672 3:0.562361 5:0.770474  
-204.8 1:0.707011 2:0.2041 3:0.515757 5:0.753972  
-204.8 1:0.597324 2:0.120973 3:0.60719 5:0.734947  
-204.8 1:0.63921 2:0.12255 3:0.564581 5:0.703651  
-204.8 1:0.791903 2:0.331831 3:0.648025 5:0.763021  
-204.8 1:0.354626 2:0.24296 3:0.565024 5:0.685467  
-204.8 1:0.287245 2:0.148006 3:0.521083 5:0.694657  
-204.8 1:0.39357 2:0.290831 3:0.705726 4:0.011236 5:0.682273  
-204.8 1:0.326889 2:0.142938 3:0.446072 5:0.730156  
-204.8 1:0.569447 2:0.132124 3:0.576121 5:0.764114  
-204.8 1:0.54136 2:0.195202 3:0.569907 4:0.011236 5:0.77619  
-204.8 1:0.533515 2:0.242284 3:0.74079 5:0.771343  
-204.8 1:0.735309 2:0.331719 3:0.522415 5:0.768597  
-204.8 1:0.643973 2:0.299504 3:0.632934 5:0.781009  
-204.8 1:0.646985 2:0.294098 3:0.526409 5:0.744333  
-204.8 1:0.597745 2:0.397499 3:0.471815 5:0.710459  
-204.8 1:0.829866 2:0.302884 3:0.560142 5:0.740859  
-204.8 1:0.419066 2:0.270219 3:0.575677 5:0.709843  
-204.8 1:0.26196 2:0.156229 3:0.529072 5:0.635622  
-204.8 1:0.497023 2:0.126492 3:0.739902 5:0.754616  
-204.8 1:0.5083 2:0.0593602 3:0.585885 5:0.724216  
-204.8 1:0.877145 2:0.126155 3:0.580559 5:0.69334

-204.8 1:0.323247 2:0.22629 3:0.762983 4:0.0224719 5:0.754672  
-204.8 1:0.690761 2:0.130998 3:0.458944 5:0.728727  
-204.8 1:0.34426 2:0.259856 3:0.562361 5:0.759799  
-204.8 1:0.763676 2:0.492904 3:0.579228 5:0.668208  
-204.8 1:0.550956 2:0.198806 3:0.459831 5:0.733182  
-204.8 1:0.693843 2:0.482316 3:0.58411 5:0.713933  
-204.8 1:0.734958 2:0.154765 3:0.537949 5:0.713485  
-204.8 1:0.57421 2:0.129646 3:0.640479 5:0.739738  
-204.8 1:0.808853 2:0.31595 3:0.559698 5:0.67524  
-204.8 1:0.26266 2:0.169633 3:0.525965 5:0.739402  
-204.8 1:0.775723 2:0.381392 3:0.528185 5:0.739794  
-204.8 1:0.526091 2:0.155891 3:0.49889 5:0.74495  
-204.8 1:0.463123 2:0.0916873 3:0.677319 4:0.0449438 5:0.687036  
-204.8 1:0.574771 2:0.213674 3:0.557479 5:0.784624  
-204.8 1:0.567766 2:0.294999 3:0.326676 5:0.725141  
-204.8 1:0.402255 2:0.109822 3:0.655126 4:0.0224719 5:0.726934  
-204.8 1:0.497373 2:0.0679207 3:0.52419 4:0.0337079 5:0.7424  
-204.8 1:0.457239 2:0.188443 3:0.735908 5:0.756241  
-204.8 1:0.618057 2:0.324285 3:0.472703 5:0.708946  
-204.8 1:0.358339 2:0.124916 3:0.70617 5:0.774901  
-204.8 1:0.39371 2:0.165127 3:0.655126 4:0.0224719 5:0.767785  
-204.8 1:0.695104 2:0.0452805 3:0.679982 4:0.011236 5:0.754  
-204.8 1:0.537578 2:0.194188 3:0.31913 5:0.718753  
-204.8 1:0.571549 2:0.140347 3:0.575233 5:0.713541  
-204.8 1:0.502136 2:0.415859 3:0.560142 5:0.749545  
-204.8 1:0.430623 2:0.157693 3:0.592099 5:0.703735  
-204.8 1:0.75366 2:0.206578 3:0.554816 5:0.741559  
-204.8 1:0.330321 2:0.254449 3:0.552153 5:0.790199  
-204.8 1:0.667857 2:0.145528 3:0.616955 5:0.732426  
-204.8 1:0.365623 2:0.240707 3:0.607634 4:0.011236 5:0.711328  
-204.8 1:0.274638 2:0.170196 3:0.553928 4:0.0224719 5:0.759631  
-204.8 1:0.404847 2:0.191034 3:0.627164 4:0.011236 5:0.689081  
-204.8 1:0.57435 2:0.168506 3:0.565912 5:0.756297  
-204.8 1:0.445962 2:0.152624 3:0.33067 5:0.746407  
-204.8 1:0.528262 2:0.0976571 3:0.628495 5:0.773921

-204.8 1:0.494502 2:0.2861 3:0.525965 4:0.011236 5:0.777255  
-204.8 1:0.253345 2:0.0842532 3:0.518864 5:0.752234  
-204.8 1:0.726973 2:0.151836 3:0.583222 5:0.814827  
-204.8 2:0.109597 3:0.574345 4:0.0224719 5:0.781738  
-204.8 1:0.424389 2:0.179432 3:0.68664 4:0.011236 5:0.78171  
-204.8 1:0.32836 2:0.287565 3:0.539281 4:0.011236 5:0.685075  
-204.8 1:0.608881 2:0.225051 3:0.505104 4:0.011236 5:0.791908  
-204.8 1:0.70547 2:0.163888 3:0.396804 5:0.757138  
-204.8 1:0.461652 2:0.0673575 3:0.531292 5:0.738365  
-204.8 1:0.277229 2:0.195765 3:0.571682 4:0.011236 5:0.746379  
-204.8 1:0.431323 2:0.154652 3:0.627164 5:0.720266  
-204.8 1:0.658682 2:0.188105 3:0.651576 5:0.74212  
-204.8 1:0.332283 2:0.221897 3:0.571682 5:0.644728  
-204.8 1:0.586748 2:0.247128 3:0.505548 4:0.0224719 5:0.737273  
-204.8 1:0.333824 2:0.238455 3:0.611185 5:0.720882  
-204.8 1:0.320165 2:0.196779 3:0.52996 4:0.0224719 5:0.716791  
-204.8 1:0.382153 2:0.167831 3:0.468708 4:0.0674157 5:0.720182  
-204.8 1:0.697906 2:0.190696 3:0.627164 4:0.011236 5:0.701465  
-204.8 1:0.288926 2:0.163212 3:0.583222 5:0.69928  
-204.8 1:0.246901 2:0.164902 3:0.628939 5:0.712757  
-204.8 1:0.877916 2:0.343996 3:0.482024 5:0.717464  
-204.8 1:0.342439 2:0.123451 3:0.776742 4:0.0898876 5:0.74523  
-204.8 1:0.797366 2:0.338702 3:0.523302 5:0.76092  
-204.8 1:0.312741 2:0.252985 3:0.618287 5:0.770194  
-204.8 1:0.281011 2:0.0927011 3:0.625388 5:0.744613  
-204.8 1:0.430343 2:0.17932 3:0.588992 5:0.757446  
-204.8 1:0.581004 2:0.162987 3:0.627608 5:0.71525  
-204.8 1:0.565245 2:0.208493 3:0.512206 5:0.743016  
-204.8 1:0.452336 2:0.246114 3:0.457168 4:0.0224719 5:0.723376  
-204.8 1:0.402676 2:0.236089 3:0.560586 4:0.011236 5:0.754168  
-204.8 1:0.736009 2:0.151611 3:0.649356 5:0.734275  
-204.8 1:0.676333 2:0.26729 3:0.485575 5:0.705696  
-204.8 1:0.256567 2:0.129534 3:0.498447 5:0.759715  
-204.8 1:0.548575 2:0.167831 3:0.623613 5:0.79712  
-204.8 1:0.667367 2:0.339829 3:0.600976 5:0.764562

-204.8 1:0.580024 2:0.183262 3:0.62095 5:0.727746  
-204.8 1:0.559081 2:0.277202 3:0.569463 4:0.0224719 5:0.788294  
-204.8 1:0.291378 2:0.209056 3:0.475366 5:0.732313  
-204.8 1:0.632346 2:0.286438 3:0.627164 5:0.778179  
-204.8 1:0.817889 2:0.215364 3:0.541944 5:0.76728  
-204.8 1:0.543041 2:0.138883 3:0.756325 4:0.0337079 5:0.583396  
-204.8 1:0.671289 2:0.133138 3:0.679982 5:0.725673  
-204.8 1:0.440429 2:0.155103 3:0.759876 5:0.764843  
-204.8 1:0.686699 2:0.284186 3:0.536174 5:0.713233  
-204.8 1:0.298802 2:0.128182 3:0.463382 4:0.011236 5:0.687652  
-204.8 1:0.668628 2:0.28993 3:0.451842 5:0.751394  
-204.8 1:0.55733 2:0.332395 3:0.569463 5:0.774509  
-204.8 1:0.32829 2:0.103965 3:0.69818 5:0.75739  
-204.8 1:0.299293 2:0.0536157 3:0.537949 5:0.777927  
-204.8 1:0.762065 2:0.145303 3:0.571238 5:0.72049  
-204.8 1:0.641031 2:0.198355 3:0.647581 5:0.74806  
-204.8 1:0.275828 2:0.164789 3:0.581447 5:0.701942  
-204.8 1:0.282762 2:0.291169 3:0.509987 5:0.721106  
-204.8 1:0.554598 2:0.0493354 3:0.5415 5:0.754588  
-204.8 1:0.63991 2:0.12424 3:0.440746 5:0.756325  
-204.8 1:0.532535 2:0.363145 3:0.584554 5:0.756773  
-204.8 1:0.496183 2:0.149471 3:0.601864 4:0.011236 5:0.717015  
-204.8 1:0.637809 2:0.398513 3:0.517088 4:0.011236 5:0.744585  
-204.8 1:0.563073 2:0.101374 3:0.566356 4:0.011236 5:0.764002  
-204.8 1:0.912657 2:0.170421 3:0.555704 5:0.811549  
-204.8 1:0.63998 2:0.310993 3:0.608966 4:0.011236 5:0.721639  
-204.8 1:0.306017 2:0.0857175 3:0.454949 4:0.011236 5:0.704099  
-204.8 1:0.277439 2:0.149245 3:0.727031 4:0.011236 5:0.7786  
-204.8 1:0.815578 2:0.245213 3:0.584998 5:0.758034  
-204.8 1:0.562513 2:0.164001 3:0.560142 5:0.763778  
-204.8 1:0.301884 2:0.197004 3:0.615624 5:0.752571  
-204.8 1:0.619248 2:0.300856 3:0.471815 5:0.800566  
-204.8 1:0.286895 2:0.197342 3:0.667111 5:0.767925  
-204.8 1:0.715136 2:0.0810993 3:0.744785 5:0.780113  
-204.8 1:0.450585 2:0.322933 3:0.558367 5:0.789499



-204.8 1:0.630314 2:0.250394 3:0.598313 4:0.0337079 5:0.774985  
-204.8 1:0.534636 2:0.209619 3:0.47004 5:0.730857  
-204.8 1:0.516775 2:0.297815 3:0.554372 4:0.0337079 5:0.779973  
-204.8 1:0.660573 2:0.186866 3:0.667998 5:0.764871  
-204.8 1:0.696295 2:0.433882 3:0.488682 5:0.778235  
-204.8 1:0.267703 2:0.207704 3:0.447403 5:0.750133  
-204.8 1:0.484486 2:0.175152 3:0.565912 4:0.011236 5:0.716903  
-204.8 1:0.551166 2:0.133589 3:0.64403 5:0.80121  
-204.8 1:0.328851 2:0.0888714 3:0.562805 4:0.011236 5:0.742176  
-204.8 1:0.421867 2:0.197454 3:0.566356 5:0.693452  
-204.8 1:0.562793 2:0.0992341 3:0.52996 4:0.0224719 5:0.700205  
-204.8 1:0.653709 2:0.211759 3:0.57257 4:0.011236 5:0.750105  
-204.8 1:0.290607 2:0.207704 3:0.516201 4:0.0337079 5:0.693676  
-204.8 1:0.634447 2:0.108583 3:0.621838 5:0.750273  
-204.8 1:0.553618 2:0.100248 3:0.733245 4:0.011236 5:0.757866  
-204.8 1:0.575891 2:0.349966 3:0.450954 4:0.0224719 5:0.724468  
-204.8 1:0.706871 2:0.369565 3:0.542388 5:0.800622  
-204.8 1:0.494712 2:0.151048 3:0.565024 5:0.759575  
-204.8 1:0.333964 2:0.294661 3:0.559254 5:0.781738  
-204.8 1:0.726903 2:0.150484 3:0.631158 4:0.011236 5:0.74551  
-204.8 1:0.647685 2:0.0972066 3:0.581891 5:0.716847  
-204.8 1:0.480563 2:0.179207 3:0.527297 5:0.75767  
-204.8 1:0.551096 2:0.124127 3:0.60719 4:0.0224719 5:0.789835  
-204.8 1:0.498284 2:0.200946 3:0.580115 4:0.0224719 5:0.706817  
-204.8 1:0.619738 2:0.18743 3:0.565024 5:0.725225  
-204.8 1:0.559221 2:0.200608 3:0.719041 4:0.011236 5:0.776582  
-204.8 1:0.693353 2:0.133025 3:0.553928 4:0.011236 5:0.778544  
-204.8 1:0.586398 2:0.154877 3:0.693298 5:0.772884  
-204.8 1:0.801429 2:0.307389 3:0.633822 5:0.788602  
-204.8 1:0.504448 2:0.134152 3:0.414558 4:0.0449438 5:0.787958  
-204.8 1:0.520628 2:0.306938 3:0.465158 5:0.752823  
-204.8 1:0.735519 2:0.128633 3:0.630715 4:0.011236 5:0.701521  
-204.8 1:0.693703 2:0.187317 3:0.55304 4:0.0337079 5:0.740299  
-204.8 1:0.453807 2:0.29759 3:0.521971 4:0.011236 5:0.767112  
-204.8 1:0.572739 2:0.183149 3:0.500222 4:0.011236 5:0.777003

-204.8 1:0.371156 2:0.202861 3:0.644918 5:0.724552  
-204.8 1:0.279541 2:0.313922 3:0.748336 5:0.745566  
-204.8 1:0.316313 2:0.115003 3:0.478917 5:0.720294  
-204.8 1:0.308818 2:0.163438 3:0.536618 5:0.759827  
-204.8 1:0.707642 2:0.272359 3:0.562361 5:0.730885  
-204.8 1:0.757442 2:0.222798 3:0.565468 5:0.730324  
-204.8 1:0.318344 2:0.180333 3:0.580115 5:0.671066  
-204.8 1:0.356237 2:0.165578 3:0.454505 5:0.716679  
-204.8 1:0.413953 2:0.117369 3:0.453617 4:0.011236 5:0.786501  
-204.8 1:0.529383 2:0.219194 3:0.507767 5:0.790844  
-204.8 1:0.820761 2:0.189682 3:0.526853 5:0.791712  
-204.8 1:0.957134 2:0.2549 3:0.512206 5:0.74467  
-204.8 1:0.702318 2:0.164226 3:0.569907 5:0.756773  
-204.8 1:0.503537 2:0.196103 3:0.478029 5:0.781822  
-204.8 1:0.585207 2:0.214463 3:0.478917 4:0.0337079 5:0.802275  
-204.8 1:0.73727 2:0.175265 3:0.540613 4:0.011236 5:0.747499  
-204.8 1:0.488898 2:0.226628 3:0.449179 5:0.731837  
-204.8 1:0.466765 2:0.259067 3:0.630271 4:0.0337079 5:0.731473  
-204.8 1:0.281852 2:0.152512 3:0.552597 5:0.778207  
-204.8 1:0.367164 2:0.105992 3:0.693298 5:0.762825  
-204.8 1:0.539049 2:0.135616 3:0.709277 4:0.011236 5:0.780505  
-204.8 1:0.704069 2:0.178869 3:0.697292 4:0.011236 5:0.75725  
-204.8 1:0.5242 2:0.163888 3:0.598313 5:0.748144  
-204.8 1:0.306927 2:0.296914 3:0.576565 5:0.8104  
-204.8 1:0.689501 2:0.338027 3:0.565912 5:0.736908  
-204.8 1:0.652938 2:0.0750169 3:0.549933 4:0.0224719 5:0.798437  
-204.8 1:0.275828 2:0.140347 3:0.592099 5:0.70861  
-204.8 1:0.271836 2:0.11444 3:0.529516 5:0.73562  
-204.8 1:0.355047 2:0.280806 3:0.586329 5:0.713233  
-204.8 1:0.377951 2:0.216152 3:0.55304 5:0.729119  
-204.8 1:0.439798 2:0.329241 3:0.660009 5:0.745342  
-204.8 1:0.67171 2:0.0679207 3:0.610741 4:0.011236 5:0.804713  
-204.8 1:0.273727 2:0.246677 3:0.331114 5:0.729147  
-204.8 1:0.306507 2:0.15544 3:0.610297 5:0.765011  
-204.8 1:0.860895 2:0.346362 3:0.600089 4:0.011236 5:0.765851

-204.8 1:0.602718 2:0.253999 3:0.616955 5:0.791572  
-204.8 1:0.695594 2:0.200608 3:0.515313 5:0.795271  
-204.8 1:0.419766 2:0.344447 3:0.474922 5:0.689081  
-204.8 1:0.62338 2:0.141473 3:0.507767 5:0.783755  
-204.8 1:0.547244 2:0.195765 3:0.616511 5:0.724104  
-204.8 1:0.597324 2:0.131111 3:0.730581 4:0.011236 5:0.737917  
-204.8 1:0.484135 2:0.205001 3:0.694186 5:0.774705  
-204.8 1:0.487357 2:0.267177 3:0.549046 4:0.0674157 5:0.718416  
-204.8 1:0.317153 2:0.217842 3:0.509099 5:0.782382  
-204.8 1:0.308748 2:0.186078 3:0.546383 5:0.777423  
-204.8 1:0.34426 2:0.167718 3:0.501553 5:0.781542  
-204.8 1:0.346361 2:0.157243 3:0.748336 5:0.706144  
-204.8 1:0.598375 2:0.309529 3:0.483799 5:0.790143  
-204.8 1:0.627723 2:0.146993 3:0.597426 4:0.011236 5:0.787229  
-204.8 1:0.288926 2:0.0929263 3:0.530848 5:0.794542  
-204.8 1:0.321986 2:0.176504 3:0.536618 5:0.746743  
-204.8 1:0.443581 2:0.179883 3:0.5668 5:0.707097  
-204.8 1:0.496113 2:0.103289 3:0.541056 5:0.74212  
-204.8 1:0.535126 2:0.174702 3:0.684865 4:0.011236 5:0.711384  
-204.8 1:0.654339 2:0.174927 3:0.434976 5:0.725085  
-204.8 1:0.660853 2:0.361793 3:0.445184 4:0.011236 5:0.729596  
-204.8 1:0.832388 2:0.369002 3:0.455393 5:0.704295  
-204.8 1:0.858093 2:0.146993 3:0.525965 5:0.704295  
-204.8 1:0.295931 2:0.153526 3:0.523302 4:0.011236 5:0.678042  
-204.8 1:0.305036 2:0.183938 3:0.492676 5:0.738814  
-204.8 1:0.536597 2:0.278779 3:0.608966 5:0.726093  
-204.8 1:0.682216 2:0.617932 3:0.392366 5:0.797736  
-204.8 1:0.298102 2:0.307389 3:0.525522 5:0.704407  
-204.8 1:0.431253 2:0.127844 3:0.468708 5:0.803424  
-204.8 1:0.457169 2:0.160284 3:0.532623 5:0.743325  
-204.8 1:0.380472 2:0.21221 3:0.532179 5:0.70508  
-204.8 1:0.736849 2:0.222347 3:0.483356 5:0.815051  
-204.8 1:0.479162 2:0.11872 3:0.425211 5:0.803648  
-204.8 1:0.378511 2:0.264361 3:0.574789 5:0.761761  
-204.8 1:0.285984 2:0.163776 3:0.731025 5:0.777087

-204.8 1:0.465994 2:0.205226 3:0.495783 5:0.766356  
-204.8 1:0.40905 2:0.416423 3:0.60719 5:0.765403  
-204.8 1:0.676683 2:0.257941 3:0.58988 4:0.0224719 5:0.70012  
-204.8 1:0.714156 2:0.294323 3:0.642699 5:0.778347  
-204.8 1:0.315052 2:0.0584591 3:0.748779 5:0.766692  
-204.8 1:0.67178 2:0.112075 3:0.539725 5:0.702642  
-204.8 1:0.565455 2:0.27585 3:0.381269 5:0.756269  
-204.8 1:0.854521 2:0.2139 3:0.476254 5:0.759687  
-204.8 1:0.428591 2:0.517008 3:0.505992 5:0.75428  
-204.8 1:0.44344 2:0.200834 3:0.523746 5:0.722647  
-204.8 1:0.264481 2:0.217391 3:0.600533 5:0.681825  
-204.8 1:0.616236 2:0.269655 3:0.575233 5:0.795915  
-204.8 1:0.784479 2:0.102275 3:0.45051 5:0.722647  
-204.8 1:0.669889 2:0.27157 3:0.476254 4:0.011236 5:0.766468  
-204.8 2:0.171773 3:0.599645 5:0.7909  
-204.8 1:0.797857 2:0.116693 3:0.573014 5:0.762853  
-204.8 1:0.406108 2:0.118608 3:0.5668 4:0.011236 5:0.712  
-204.8 1:0.402676 2:0.137644 3:0.667554 5:0.747976  
-204.8 1:0.652028 2:0.157017 3:0.436751 5:0.730772  
-204.8 1:0.549555 2:0.1738 3:0.573014 5:0.71427  
-204.8 1:0.52427 2:0.371818 3:0.571238 5:0.791376  
-204.8 1:0.638369 2:0.24465 3:0.517088 5:0.782494  
-204.8 1:0.673951 2:0.165015 3:0.414558 5:0.779917  
-204.8 1:0.463193 2:0.277427 3:0.496227 5:0.801855  
-204.8 1:0.349023 2:0.144965 3:0.591656 5:0.774509  
-204.8 1:0.597605 2:0.255463 3:0.560142 4:0.011236 5:0.723572  
-46.79912392793847 1:0.598515 2:0.283735 3:0.549046 4:0.0224719 5:0.675829  
-204.8 1:0.678574 2:0.344785 3:0.711052 4:0.0561798 5:0.764619  
-204.8 1:0.798837 2:0.223812 3:0.506436 4:0.0224719 5:0.793225  
-204.8 1:0.461792 2:0.154314 3:0.548158 5:0.75103  
-204.8 1:0.62352 2:0.154652 3:0.731025 4:0.011236 5:0.765011  
-204.8 1:0.486517 2:0.260644 3:0.678651 5:0.766412  
-204.8 1:0.587869 2:0.127844 3:0.649356 5:0.777339  
-204.8 1:0.635428 2:0.364609 3:0.60941 4:0.0224719 5:0.804573  
-204.8 1:0.480563 2:0.152174 3:0.449623 5:0.761424

-204.8 1:0.461301 2:0.20624 3:0.613848 4:0.011236 5:0.719145  
-204.8 1:0.641521 2:0.191597 3:0.462494 5:0.764562  
-204.8 1:0.461161 2:0.260081 3:0.578784 5:0.705864  
-204.8 2:0.181235 3:0.767421 5:0.802639  
-204.8 2:0.215139 3:0.55526 4:0.011236 5:0.795523  
-204.8 1:0.667017 2:0.104528 3:0.567688 4:0.011236 5:0.751002  
-204.8 1:0.668418 2:0.0991214 3:0.592543 4:0.0674157 5:0.751982  
-204.8 1:0.471318 2:0.124578 3:0.412783 5:0.774817  
-204.8 1:0.406318 2:0.239919 3:0.711496 5:0.798128  
-204.8 1:0.477481 2:0.236765 3:0.622281 5:0.759407  
-204.8 1:0.657281 2:0.126155 3:0.368842 5:0.764955  
-204.8 1:0.812846 2:0.374634 3:0.621838 5:0.772464  
-204.8 1:0.356798 2:0.287903 3:0.557479 4:0.011236 5:0.76431  
-204.8 1:0.662674 2:0.141023 3:0.552153 5:0.795551  
-204.8 1:0.286825 2:0.269543 3:0.491789 5:0.798296  
-204.8 1:0.689571 2:0.251295 3:0.59787 5:0.795523  
-204.8 1:0.497163 2:0.179094 3:0.759876 5:0.760444  
-204.8 1:0.814737 2:0.116918 3:0.449179 5:0.799753  
-204.8 1:0.665686 2:0.203312 3:0.625832 5:0.744473  
-204.8 1:0.815718 2:0.32282 3:0.571682 5:0.755961  
-204.8 1:0.501506 2:0.363032 3:0.659565 4:0.0224719 5:0.773752  
-204.8 1:0.502416 2:0.459225 3:0.563693 4:0.011236 5:0.774817  
-204.8 1:0.304546 2:0.197116 3:0.578784 5:0.737021  
-204.8 1:0.730826 2:0.209507 3:0.565912 5:0.729484  
-204.8 1:0.34398 2:0.182586 3:0.434976 5:0.748452  
-204.8 1:0.515234 2:0.196553 3:0.536618 5:0.816284  
-204.8 1:0.716327 2:0.246001 3:0.580559 5:0.747864  
-204.8 1:0.353085 2:0.18957 3:0.535286 5:0.767701  
-204.8 1:0.534846 2:0.402681 3:0.55881 4:0.011236 5:0.766776  
-204.8 1:0.63879 2:0.188781 3:0.535286 5:0.789219  
-204.8 1:0.631645 2:0.240482 3:0.569907 5:0.724777  
-204.8 1:0.5899 2:0.261996 3:0.587217 4:0.011236 5:0.756521  
-204.8 1:0.50767 2:0.529173 3:0.329783 5:0.728027  
-204.8 1:0.429152 2:0.212097 3:0.511318 5:0.713485  
-204.8 1:0.530924 2:0.212773 3:0.51265 5:0.751394

-204.8 1:0.654129 2:0.172674 3:0.548158 5:0.734807  
-204.8 1:0.390138 2:0.121198 3:0.600089 5:0.729203  
-204.8 1:0.299293 2:0.291057 3:0.584998 5:0.759043  
-204.8 1:0.345941 2:0.0795224 3:0.524634 4:0.0449438 5:0.809448  
-204.8 1:0.577432 2:0.284073 3:0.582779 5:0.756829  
-204.8 1:0.293409 2:0.313809 3:0.445628 4:0.011236 5:0.690902  
-204.8 1:0.572249 2:0.252422 3:0.47004 4:0.011236 5:0.764422  
-204.8 1:0.501016 2:0.0707367 3:0.671993 4:0.0224719 5:0.777087  
-204.8 1:0.640751 2:0.257603 3:0.477585 5:0.78283  
-204.8 1:0.577923 2:0.108808 3:0.475366 5:0.786024  
-204.8 1:0.708062 2:0.242622 3:0.528185 4:0.011236 5:0.781514  
-204.8 1:0.768579 2:0.29376 3:0.51842 4:0.011236 5:0.746603  
-204.8 1:0.58997 2:0.264136 3:0.664891 5:0.782942  
-204.8 1:0.784899 2:0.25749 3:0.671549 5:0.810064  
-204.8 1:0.454577 2:0.304348 3:0.559254 4:0.0224719 5:0.774145  
-204.8 1:0.607621 2:0.158594 3:0.702175 5:0.757586  
-204.8 1:0.806682 2:0.154314 3:0.454505 5:0.78849  
-204.8 1:0.637669 2:0.129984 3:0.568575 5:0.778263  
-204.8 1:0.570008 2:0.232485 3:0.545939 5:0.735592  
-204.8 1:0.478042 2:0.167605 3:0.473147 5:0.732986  
-204.8 1:0.57323 2:0.231809 3:0.623169 5:0.738618  
-204.8 1:0.519997 2:0.274048 3:0.483356 5:0.711412  
-204.8 1:0.600196 2:0.0584591 3:0.486019 5:0.756213  
-204.8 1:0.385725 2:0.148344 3:0.468708 5:0.769718  
-204.8 1:0.314142 2:0.224487 3:0.718597 5:0.743997  
-67.1384203443311 1:0.772781 2:0.915522 3:0.517976 5:0.759883  
-204.8 1:0.838552 2:0.288691 3:0.579672 5:0.780421  
-204.8 1:0.318134 2:0.159833 3:0.533067 5:0.755513  
-204.8 1:0.380542 2:0.159045 3:0.445628 5:0.682161  
-204.8 1:0.394971 2:0.220095 3:0.543276 5:0.727859  
-204.8 1:0.489809 2:0.094278 3:0.488682 4:0.0337079 5:0.774621  
-204.8 1:0.45969 2:0.175603 3:0.478917 4:0.0561798 5:0.833067  
-204.8 1:0.489809 2:0.238004 3:0.494452 5:0.754896  
-204.8 1:0.632346 2:0.355485 3:0.541944 5:0.798885  
-204.8 1:0.527212 2:0.267853 3:0.382157 5:0.724749

-204.8 1:0.636408 2:0.176053 3:0.619618 5:0.767757  
-204.8 1:0.277509 2:0.183487 3:0.513094 5:0.729848  
-204.8 1:0.793444 2:0.518473 3:0.561917 4:0.0337079 5:0.731837  
-204.8 1:0.757232 2:0.218856 3:0.52996 4:0.0224719 5:0.775574  
-204.8 1:0.532395 2:0.364609 3:0.500666 4:0.011236 5:0.765235  
-204.8 1:0.697065 2:0.237666 3:0.660009 5:0.817769  
-204.8 1:0.579253 2:0.189457 3:0.726587 5:0.778376  
-204.8 1:0.340198 2:0.161636 3:0.588105 5:0.814099  
-204.8 1:0.543952 2:0.152174 3:0.551709 5:0.743044  
-204.8 1:0.496043 2:0.229444 3:0.478473 4:0.0561798 5:0.77647  
-204.8 1:0.627303 2:0.123226 3:0.535286 5:0.716511  
-204.8 1:0.616516 2:0.32834 3:0.450954 5:0.819983  
-204.8 1:0.465504 2:0.164789 3:0.579672 5:0.705864  
-204.8 1:0.271766 2:0.0904483 3:0.540169 5:0.736965  
-204.8 1:0.723962 2:0.176504 3:0.539281 5:0.795859  
-204.8 1:0.552707 2:0.23057 3:0.569907 5:0.796896  
-204.8 1:0.605729 2:0.131786 3:0.58411 4:0.0337079 5:0.777311  
-204.8 1:0.588639 2:0.134602 3:0.47581 5:0.800118  
-204.8 1:0.659452 2:0.281482 3:0.5415 5:0.780113  
-204.8 1:0.650907 2:0.0991214 3:0.636485 5:0.773388  
-204.8 1:0.749037 2:0.234287 3:0.546826 4:0.011236 5:0.811045  
-204.8 1:0.774252 2:0.238793 3:0.569907 5:0.757754  
-204.8 1:0.680535 2:0.13066 3:0.498447 5:0.779917  
-204.8 1:0.636058 2:0.199595 3:0.522858 4:0.0224719 5:0.758342  
-204.8 1:0.594593 2:0.327326 3:0.455393 5:0.777759  
-204.8 1:0.890033 2:0.0859428 3:0.535286 5:0.801294  
-204.8 1:0.521888 2:0.185064 3:0.565468 5:0.764282  
-204.8 1:0.829236 2:0.180897 3:0.499778 5:0.754924  
-204.8 1:0.437977 2:0.188218 3:0.443409 5:0.812586  
-204.8 1:0.581004 2:0.0696103 3:0.567244 4:0.011236 5:0.802247  
-204.8 1:0.607481 2:0.202861 3:0.616955 5:0.795579  
-204.8 1:0.527072 2:0.0688218 3:0.517532 5:0.749573  
-204.8 1:0.646494 2:0.155328 3:0.541056 5:0.802667  
-204.8 1:0.562513 2:0.241834 3:0.574789 4:0.011236 5:0.764366  
-204.8 1:0.574981 2:0.191822 3:0.6498 4:0.011236 5:0.747611

-204.8 1:0.537858 2:0.203537 3:0.582779 5:0.742428  
-204.8 1:0.641801 2:0.289142 3:0.475366 4:0.0224719 5:0.754812  
-204.8 1:0.517546 2:0.13449 3:0.60719 4:0.011236 5:0.75215  
-204.8 1:0.65609 2:0.119171 3:0.584998 5:0.804152  
-204.8 1:0.605239 2:0.264699 3:0.596982 4:0.0337079 5:0.763246  
-204.8 1:0.335295 2:0.146317 3:0.580115 5:0.756157  
-204.8 1:0.312391 2:0.298829 3:0.576121 5:0.76092  
-204.8 1:0.666106 2:0.0968687 3:0.573458 5:0.747948  
-204.8 1:0.604189 2:0.170083 3:0.47581 5:0.791068  
-204.8 1:0.657351 2:0.204438 3:0.568575 5:0.804124  
-204.8 1:0.448484 2:0.117481 3:0.309809 5:0.735003  
-204.8 1:0.794495 2:0.242847 3:0.629383 5:0.785044  
-204.8 1:0.487217 2:0.23699 3:0.514869 5:0.740299  
-204.8 1:0.279821 2:0.174026 3:0.522415 5:0.714746  
-204.8 1:0.47615 2:0.279905 3:0.656902 5:0.765599  
-204.8 1:0.790993 2:0.247916 3:0.584554 5:0.783531  
-204.8 1:0.380752 2:0.243636 3:0.491345 5:0.749713  
-204.8 1:0.519157 2:0.171773 3:0.584554 4:0.0337079 5:0.795691  
-204.8 1:0.37732 2:0.333296 3:0.613848 5:0.757194  
-204.8 1:0.431253 2:0.219531 3:0.443853 5:0.742232  
-204.8 1:0.702739 2:0.234738 3:0.570794 4:0.0224719 5:0.822364  
-204.8 1:0.537578 2:0.130998 3:0.565024 4:0.011236 5:0.811493  
-204.8 1:0.512993 2:0.357175 3:0.561474 5:0.750413  
-204.8 1:0.599776 2:0.13663 3:0.571238 5:0.77675  
-204.8 1:0.26273 2:0.385672 3:0.437639 4:0.011236 5:0.731137  
-204.8 1:0.669468 2:0.34287 3:0.585885 4:0.011236 5:0.76022  
-204.8 1:0.619878 2:0.118833 3:0.600976 4:0.011236 5:0.801743  
-204.8 1:0.451285 2:0.17549 3:0.531292 5:0.790367  
-204.8 1:0.533585 2:0.142938 3:0.557923 5:0.823709  
-204.8 1:0.565175 2:0.462829 3:0.562361 5:0.770923  
-204.8 1:0.598585 2:0.368326 3:0.479805 5:0.770923  
-204.8 1:0.32759 2:0.298265 3:0.504217 5:0.770755  
-204.8 1:0.664565 2:0.190471 3:0.509543 5:0.770502  
-204.8 1:0.63949 2:0.614891 3:0.554372 5:0.779804  
-204.8 1:0.42579 2:0.191935 3:0.549046 5:0.779244



-204.8 1:0.353155 2:0.157581 3:0.540169 5:0.726093  
-204.8 1:0.587658 2:0.26943 3:0.494008 4:0.0449438 5:0.802051  
-204.8 1:0.621769 2:0.193963 3:0.599645 5:0.767841  
-204.8 1:0.63998 2:0.133251 3:0.587661 5:0.747023  
-204.8 1:0.532325 2:0.176278 3:0.571238 5:0.773276  
-204.8 1:0.285634 2:0.11061 3:0.562361 4:0.0337079 5:0.732341  
-204.8 1:0.435245 2:0.285988 3:0.481136 5:0.807486  
-204.8 1:0.45871 2:0.140122 3:0.495783 5:0.752683  
-204.8 1:0.621839 2:0.303672 3:0.569463 5:0.758679  
-204.8 1:0.342509 2:0.0656679 3:0.608078 5:0.775378  
-204.8 1:0.469496 2:0.223248 3:0.485131 4:0.0674157 5:0.786613  
-204.8 1:0.772081 2:0.201171 3:0.6751 5:0.796363  
-204.8 1:0.286195 2:0.0907862 3:0.60719 5:0.755905  
-204.8 1:0.7545 2:0.105317 3:0.457168 4:0.011236 5:0.791068  
-204.8 1:0.601807 2:0.33431 3:0.526853 4:0.011236 5:0.805581  
-204.8 1:0.753099 2:0.449763 3:0.502441 5:0.802948  
-204.8 1:0.336205 2:0.132688 3:0.513094 5:0.828976  
-167.5937604981435 1:0.749107 2:0.121198 3:0.71771 5:0.788042  
-204.8 1:0.708902 2:0.247804 3:0.560142 5:0.793029  
-204.8 1:0.505008 2:0.200834 3:0.586329 5:0.757922  
-204.8 1:0.430973 2:0.168169 3:0.462938 4:0.0224719 5:0.797512  
-204.8 1:0.759473 2:0.423068 3:0.47581 5:0.805469  
-204.8 1:0.604959 2:0.113314 3:0.671549 4:0.0224719 5:0.784708  
-204.8 1:0.641031 2:0.19982 3:0.558367 5:0.764955  
-204.8 1:0.571479 2:0.279342 3:0.608078 5:0.807262  
-98.34203366880708 1:0.642572 2:0.39581 3:0.594763 5:0.729904  
-204.8 1:0.584226 2:0.250732 3:0.487794 5:0.799753  
-204.8 1:0.629054 2:0.394571 3:0.577452 5:0.789191  
-204.8 1:0.750438 2:0.323947 3:0.559254 5:0.82455  
-204.8 1:0.383134 2:0.13066 3:0.584554 5:0.76134  
-204.8 1:0.660013 2:0.154201 3:0.598757 5:0.739178  
-204.8 1:0.62254 2:0.164564 3:0.446072 5:0.766103  
-204.8 1:0.676543 2:0.210858 3:0.452286 5:0.732566  
-204.8 1:0.354696 2:0.272359 3:0.599645 5:0.773136  
-204.8 1:0.696085 2:0.416761 3:0.545051 5:0.765263

-204.8 1:0.462002 2:0.106893 3:0.490013 4:0.0224719 5:0.793954  
-204.8 1:0.460881 2:0.0767065 3:0.600533 4:0.0224719 5:0.760416  
-204.8 1:0.388107 2:0.217729 3:0.557035 5:0.665994  
-204.8 1:0.335224 2:0.292633 3:0.577008 4:0.011236 5:0.817629  
-204.8 1:0.265672 2:0.115904 3:0.584554 5:0.77888  
-204.8 1:0.526301 2:0.188105 3:0.473147 4:0.011236 5:0.787313  
-204.8 1:0.504938 2:0.347038 3:0.478473 5:0.764815  
-204.8 1:0.610843 2:0.166141 3:0.500666 5:0.7612  
-204.8 1:0.296981 2:0.186866 3:0.483799 4:0.011236 5:0.783727  
-204.8 1:0.706171 2:0.178531 3:0.559254 5:0.75103  
-204.8 1:0.540099 2:0.0810993 3:0.628495 5:0.709451  
-204.8 1:0.494011 2:0.182811 3:0.492233 5:0.817153  
-204.8 1:0.894235 2:0.601149 3:0.556591 5:0.864083  
-204.8 1:0.460811 2:0.258842 3:0.51842 5:0.778572  
-141.9494447762791 1:0.713595 2:0.248254 3:0.733245 4:0.0224719 5:0.799529  
-204.8 1:0.591231 2:0.201284 3:0.513981 5:0.743213  
-204.8 1:0.762485 2:0.258617 3:0.53573 5:0.819226  
-204.8 1:0.649996 2:0.425884 3:0.500666 5:0.800342  
-204.8 1:0.581425 2:0.117932 3:0.440302 5:0.801603  
-204.8 1:0.539189 2:0.277991 3:0.52419 5:0.759491  
-204.8 1:0.509631 2:0.345123 3:0.538837 5:0.759491  
-204.8 1:0.62233 2:0.310318 3:0.615624 5:0.802583  
-204.8 1:0.658402 2:0.310768 3:0.526853 5:0.765543  
-204.8 1:0.561392 2:0.277765 3:0.510431 4:0.011236 5:0.818414  
-204.8 1:0.585697 2:0.320117 3:0.486906 5:0.80348  
-204.8 1:0.582685 2:0.336224 3:0.508655 5:0.72741  
-204.8 1:0.665056 2:0.220095 3:0.545495 5:0.780701  
-204.8 1:0.739581 2:0.364384 3:0.451842 5:0.749909  
-204.8 1:0.756672 2:0.172336 3:0.556591 5:0.778992  
-204.8 1:0.788331 2:0.136743 3:0.525522 5:0.824269  
-204.8 1:0.605449 2:0.317414 3:0.613404 4:0.011236 5:0.806338  
-204.8 1:0.336695 2:0.250056 3:0.484687 5:0.762349  
-204.8 1:0.651888 2:0.153976 3:0.508655 4:0.011236 5:0.809112  
-204.8 1:0.650907 2:0.230683 3:0.490901 4:0.0337079 5:0.802415  
-204.8 1:0.566996 2:0.117819 3:0.546383 4:0.011236 5:0.778516

-204.8 1:0.536597 2:0.114665 3:0.541056 5:0.822616  
-204.8 1:0.600126 2:0.393107 3:0.569907 5:0.763218  
-204.8 1:0.607411 2:0.127844 3:0.546383 5:0.782018  
-204.8 1:0.613084 2:0.209507 3:0.546383 5:0.769073  
-204.8 1:0.728514 2:0.211421 3:0.562361 5:0.763218  
-204.8 1:0.447993 2:0.283172 3:0.537506 4:0.0224719 5:0.85041  
-204.8 1:0.430413 2:0.171998 3:0.567688 5:0.782858  
-101.1193379955271 2:0.32834 3:0.659565 5:0.803872  
-204.8 1:0.559291 2:0.249268 3:0.536618 4:0.0224719 5:0.76078  
-204.8 1:0.455838 2:0.176053 3:0.5668 4:0.011236 5:0.807066  
-204.8 1:0.665406 2:0.204213 3:0.649356 5:0.787678  
-204.8 1:0.576031 2:0.0682586 3:0.600976 4:0.011236 5:0.79485  
-204.8 1:0.683827 2:0.177292 3:0.50111 5:0.825923  
-204.8 1:0.460391 2:0.242172 3:0.592543 5:0.815892  
-204.8 1:0.550606 2:0.129984 3:0.60364 5:0.764478  
-204.8 1:0.81922 2:0.184276 3:0.60364 4:0.0449438 5:0.818498  
-204.8 1:0.480633 2:0.113877 3:0.529072 5:0.774621  
-204.8 1:0.479372 2:0.0973192 3:0.65557 4:0.0224719 5:0.801098  
-204.8 1:0.6065 2:0.156567 3:0.536174 5:0.771315  
-204.8 1:0.601807 2:0.185965 3:0.47581 5:0.776218  
-204.8 1:0.593962 2:0.0859428 3:0.565912 4:0.0224719 5:0.784287  
-204.8 1:0.347062 2:0.108808 3:0.304927 4:0.011236 5:0.758118  
-204.8 1:0.7379 2:0.183262 3:0.669774 4:0.0449438 5:0.821243  
-204.8 1:0.659873 2:0.421153 3:0.588992 4:0.011236 5:0.801883  
-204.8 1:0.538559 2:0.131449 3:0.736352 4:0.011236 5:0.798268  
-204.8 1:0.680745 2:0.625479 3:0.584554 4:0.011236 5:0.810036  
-204.8 1:0.581355 2:0.177067 3:0.53573 5:0.729792  
-204.8 1:0.718358 2:0.273598 3:0.541944 5:0.800538  
-204.8 1:0.490929 2:0.195427 3:0.537506 5:0.783447  
-204.8 1:0.822302 2:0.4082 3:0.671549 5:0.791208  
-204.8 1:0.750998 2:0.152624 3:0.630271 5:0.836878  
-204.8 1:0.644953 2:0.203424 3:0.586329 5:0.823009  
-204.8 1:0.544302 2:0.28948 3:0.493564 5:0.799445  
-204.8 1:0.576031 2:0.235639 3:0.5668 5:0.826707  
-204.8 1:0.761084 2:0.279793 3:0.55881 4:0.011236 5:0.814939

-204.8 1:0.905092 2:0.195314 3:0.483356 5:0.840016  
-204.8 1:0.534706 2:0.160622 3:0.630271 5:0.781233  
-204.8 1:0.422428 2:0.232935 3:0.536618 5:0.787958  
-204.8 1:0.370596 2:0.344222 3:0.624945 4:0.0224719 5:0.806786  
-204.8 1:0.771521 2:0.233836 3:0.607634 5:0.785884  
-204.8 1:0.607971 2:0.143501 3:0.600976 5:0.740523  
-204.8 1:0.529593 2:0.240032 3:0.642699 5:0.738029  
-204.8 1:0.774392 2:0.0905609 3:0.570351 5:0.829845  
-204.8 1:0.457729 2:0.225501 3:0.49312 5:0.730016  
-204.8 1:0.685088 2:0.101036 3:0.526409 5:0.79202  
-204.8 1:0.652238 2:0.145528 3:0.574789 5:0.737525  
-204.8 1:0.543462 2:0.180446 3:0.538837 5:0.804993  
-204.8 1:0.537508 2:0.158369 3:0.440746 4:0.011236 5:0.798941  
-204.8 1:0.496043 2:0.246565 3:0.587661 5:0.735788  
-204.8 1:0.436646 2:0.387587 3:0.533511 5:0.786221  
-204.8 1:0.64012 2:0.153188 3:0.557035 5:0.818834  
-204.8 1:0.435946 2:0.235075 3:0.5415 5:0.798941  
-204.8 1:0.321566 2:0.442555 3:0.461163 5:0.798941  
-204.8 1:0.649856 2:0.147894 3:0.537506 5:0.810737  
-204.8 1:0.599916 2:0.100248 3:0.447403 5:0.839007  
-204.8 1:0.790993 2:0.499887 3:0.574345 5:0.839679  
-204.8 1:0.348322 2:0.212773 3:0.718154 5:0.819142  
-204.8 1:0.83659 2:0.344222 3:0.435863 5:0.655599  
-204.8 1:0.554038 2:0.256139 3:0.575233 5:0.743605  
-204.8 1:0.702809 2:0.55294 3:0.484243 5:0.786361  
-204.8 1:0.665826 2:0.21649 3:0.484687 5:0.800818  
-204.8 1:0.27856 2:0.129308 3:0.443853 5:0.810625  
-204.8 1:0.696995 2:0.203762 3:0.570794 5:0.809504  
-204.8 1:0.626672 2:0.18191 3:0.718154 5:0.800818  
-204.8 1:0.304826 2:0.357738 3:0.569463 4:0.011236 5:0.800734  
-204.8 1:0.561462 2:0.171998 3:0.488682 4:0.101124 5:0.854473  
-204.8 1:0.581565 2:0.298491 3:0.533067 5:0.800398  
-204.8 1:0.533305 2:0.262784 3:0.457168 5:0.81648  
-204.8 1:0.710163 2:0.202185 3:0.563249 5:0.7974  
-204.8 1:0.732017 2:0.149471 3:0.505104 5:0.844022

-204.8 1:0.453527 2:0.425884 3:0.656014 5:0.783223  
-204.8 1:0.600196 2:0.255688 3:0.478029 5:0.801547  
-204.8 1:0.663305 2:0.1221 3:0.506436 4:0.0224719 5:0.835028  
-204.8 1:0.596204 2:0.195652 3:0.544163 5:0.760388  
-204.8 1:0.619248 2:0.131336 3:0.554372 5:0.799501  
-204.8 1:0.461512 2:0.0731021 3:0.551265 4:0.011236 5:0.770334  
-204.8 1:0.430272 2:0.495157 3:0.531735 4:0.011236 5:0.803396  
-204.8 1:0.601947 2:0.0756927 3:0.537506 5:0.801322  
-204.8 1:0.624501 2:0.374409 3:0.528185 4:0.011236 5:0.816088  
-204.8 1:0.495062 2:0.170647 3:0.519751 5:0.782802  
-204.8 1:0.579744 2:0.157017 3:0.572126 4:0.0449438 5:0.854025  
-204.8 1:0.646845 2:0.19982 3:0.677319 5:0.838195  
-204.8 1:0.418785 2:0.306488 3:0.378162 5:0.857163  
-204.8 1:0.487287 2:0.175941 3:0.553928 5:0.824886  
-147.6290415083952 1:0.806122 2:0.766389 3:0.484687 5:0.797596  
-204.8 1:0.457379 2:0.134264 3:0.631158 4:0.011236 5:0.825726  
-204.8 1:0.291378 2:0.143388 3:0.446516 5:0.802667  
-204.8 1:0.678854 2:0.417436 3:0.571682 5:0.814995  
-204.8 1:0.372837 2:0.144852 3:0.480249 5:0.818077  
-204.8 1:0.629474 2:0.325749 3:0.642699 5:0.806422  
-204.8 1:0.421027 2:0.316625 3:0.613848 5:0.791572  
-204.8 1:0.523569 2:0.237891 3:0.439858 5:0.816368  
-204.8 1:0.620649 2:0.110498 3:0.515757 5:0.829117  
-204.8 1:0.642012 2:0.277765 3:0.579228 4:0.0224719 5:0.872629  
-204.8 1:0.581915 2:0.250957 3:0.60142 4:0.0224719 5:0.875067  
-204.8 1:0.397913 2:0.0964181 3:0.44474 5:0.849458  
-204.8 1:0.634937 2:0.260419 3:0.569019 5:0.848029  
-204.8 1:0.266232 2:0.0820005 3:0.468708 5:0.815107  
-204.8 1:0.564614 2:0.80829 3:0.539725 5:0.84108  
-204.8 1:0.648666 2:0.366637 3:0.531292 4:0.011236 5:0.829005  
-204.8 1:0.762485 2:0.0978824 3:0.598757 5:0.68953  
-204.8 2:0.185402 3:0.528628 5:0.843574  
-204.8 1:0.820551 2:0.2246 3:0.584554 5:0.852512  
-204.8 1:0.702458 2:0.270782 3:0.452286 5:0.68953  
-204.8 1:0.642782 2:0.456972 3:0.498003 5:0.68953

-204.8 1:0.791203 2:0.184276 3:0.470928 5:0.68953  
-204.8 1:0.746375 2:0.45089 3:0.537949 5:0.68953  
-204.8 1:0.730265 2:0.135391 3:0.578784 5:0.68953  
-204.8 1:0.712615 2:0.454269 3:0.585885 5:0.68953  
-204.8 1:0.713245 2:0.350304 3:0.537506 5:0.68953  
-204.8 1:0.712335 2:0.243861 3:0.625832 5:0.837466  
-204.8 1:0.705891 2:0.184952 3:0.557923 4:0.011236 5:0.707966  
-204.8 1:0.769139 2:0.117256 3:0.631602 5:0.733939  
-204.8 1:0.718498 2:0.292746 3:0.525965 4:0.011236 5:0.725113  
-204.8 1:0.570778 2:0.225614 3:0.667554 5:0.792665  
-204.8 1:0.554388 2:0.208831 3:0.708833 5:0.747976  
-204.8 2:0.166141 3:0.569907 5:0.849934  
-204.8 1:0.788261 2:0.183713 3:0.443853 4:0.011236 5:0.851391  
-204.8 1:0.610983 2:0.147105 3:0.600089 4:0.011236 5:0.793982  
-204.8 1:0.601737 2:0.172787 3:0.519308 5:0.74226  
-204.8 1:0.523359 2:0.174927 3:0.54727 5:0.827071  
-204.8 1:0.498914 2:0.158256 3:0.591212 5:0.737385  
-204.8 1:0.728444 2:0.267403 3:0.569907 5:0.859741  
-204.8 1:0.674091 2:0.736314 3:0.513538 4:0.0224719 5:0.853352  
-204.8 1:0.679555 2:0.308065 3:0.528185 5:0.863187  
-204.8 1:0.277579 2:0.270782 3:0.580115 5:0.838699  
-204.8 1:0.634867 2:0.224825 3:0.345317 5:0.849822  
-204.8 1:0.545423 2:0.162086 3:0.432756 5:0.840184  
-204.8 1:0.333543 2:0.0773823 3:0.542388 4:0.0224719 5:0.872741  
-204.8 1:0.635077 2:0.434107 3:0.484687 4:0.0224719 5:0.839511  
-204.8 1:0.603558 2:0.170872 3:0.546383 4:0.011236 5:0.778628  
-204.8 1:0.673601 2:0.912706 3:0.577896 5:0.847497  
-204.8 1:0.738951 2:0.365736 3:0.547714 5:0.878177  
-204.8 1:0.797296 2:0.617819 3:0.543276 5:0.859292  
-204.8 1:0.674932 2:0.24251 3:0.510874 5:0.890224  
-204.8 1:0.720249 2:0.467898 3:0.632934 5:0.882744  
-204.8 1:0.501576 2:0.474769 3:0.790945 4:0.011236 5:0.852848  
-204.8 1:0.528472 2:0.182361 3:0.488682 5:0.854473  
-204.8 1:0.771801 2:0.146993 3:0.510431 5:0.801407  
-204.8 1:0.73797 2:0.435909 3:0.444296 5:0.857275

-204.8 1:0.730826 2:0.395472 3:0.671549 4:0.011236 5:0.878905  
-204.8 1:0.947818 2:0.440978 3:0.662228 5:0.857443  
-204.8 1:0.613854 2:0.349741 3:0.512206 5:0.815864  
-204.8 1:0.542131 2:0.13449 3:0.608078 4:0.0224719 5:0.815864  
-204.8 1:0.494221 2:0.121198 3:0.551265 5:0.824045  
-204.8 1:0.296421 2:0.249718 3:0.650244 5:0.823065  
-204.8 1:0.519997 2:0.60419 3:0.656902 5:0.88717  
-204.8 1:0.98382 2:0.323384 3:0.75233 5:0.83727  
-204.8 1:0.720039 2:0.353233 3:0.544163 5:0.844667  
-204.8 2:0.297477 3:0.625388 5:0.868987  
-204.8 1:0.801429 2:0.544943 3:0.581447 5:0.83458  
-204.8 1:0.699587 2:0.263573 3:0.656902 5:0.834104  
-204.8 1:0.708342 2:0.335211 3:0.60142 4:0.0224719 5:0.865064  
-204.8 1:0.756461 2:0.12897 3:0.532179 5:0.90146  
-204.8 1:0.73727 2:0.84501 3:0.469152 5:0.873357  
-204.8 1:0.826434 2:0.145979 3:0.491789 5:0.874366  
-204.8 1:0.755691 2:0.532778 3:0.47004 5:0.873974  
-204.8 1:0.484696 2:0.0876323 3:0.55526 5:0.833515  
-204.8 1:0.477061 2:0.376549 3:0.651576 4:0.011236 5:0.833515  
-204.8 1:0.681446 2:0.513404 3:0.557035 5:0.833515  
-204.8 1:0.650067 2:0.307389 3:0.474035 4:0.0449438 5:0.833515  
-204.8 1:0.804581 2:0.310768 3:0.563249 5:0.833515  
-204.8 1:0.515655 2:0.176278 3:0.484243 5:0.833515  
-204.8 1:0.611053 2:0.344109 3:0.551709 4:0.011236 5:0.833515  
-204.8 1:0.722631 2:0.457761 3:0.508655 5:0.849234  
-204.8 1:0.780346 2:0.571075 3:0.498003 4:0.011236 5:0.83444  
-204.8 1:0.758213 2:0.166929 3:0.520639 5:0.849234  
-204.8 1:0.663235 2:0.344222 3:0.557035 4:0.011236 5:0.835757  
-204.8 1:0.657561 2:0.336112 3:0.57834 5:0.858816  
-204.8 1:0.767598 2:0.0727641 3:0.607634 5:0.850663  
-204.8 1:0.748266 2:0.358977 3:0.62672 5:0.848225  
-204.8 1:0.772571 2:0.338477 3:0.519751 5:0.852288  
-204.8 1:0.521048 2:0.313584 3:0.444296 5:0.85226  
-204.8 1:0.795125 2:0.460014 3:0.684865 5:0.859376  
-204.8 1:0.594102 2:0.137531 3:0.590324 5:0.871256

-204.8 1:0.676263 2:0.267853 3:0.674212 5:0.864055  
-204.8 1:0.566646 2:0.345461 3:0.482024 5:0.842369  
-204.8 1:0.641381 2:0.23485 3:0.611629 4:0.0224719 5:0.844078  
-204.8 1:0.752469 2:0.338815 3:0.610741 5:0.873133  
-204.8 1:0.673951 2:0.620297 3:0.513094 5:0.863411  
-204.8 1:0.827485 2:0.344672 3:0.569463 5:0.858648  
-204.8 1:0.756041 2:0.17718 3:0.548602 5:0.856967  
-204.8 1:0.570218 2:0.231922 3:0.652907 5:0.882463  
-204.8 1:0.862506 2:0.34884 3:0.530404 5:0.843182  
-204.8 1:0.715556 2:0.152399 3:0.625388 5:0.860665  
-204.8 1:0.714436 2:0.3262 3:0.460719 5:0.874058  
-204.8 1:0.628844 2:0.351994 3:0.596982 5:0.847833  
-204.8 1:0.675142 2:0.310768 3:0.47004 5:0.847833  
-204.8 1:0.761575 2:0.356274 3:0.639148 5:0.847833  
-204.8 1:0.676753 2:0.309529 3:0.618287 4:0.011236 5:0.848841  
-204.8 1:0.532605 2:0.417436 3:0.546383 5:0.849066  
-204.8 1:0.651537 2:0.879815 3:0.516644 5:0.85593  
-204.8 1:0.569798 2:0.396936 3:0.528628 4:0.011236 5:0.851559  
-204.8 1:0.534356 2:0.239806 3:0.726587 4:0.0224719 5:0.863411  
-204.8 1:0.603418 2:0.12041 3:0.604083 4:0.0224719 5:0.863243  
-204.8 1:0.621699 2:0.48164 3:0.577452 4:0.011236 5:0.869799  
-204.8 1:0.594593 2:0.180108 3:0.600533 5:0.869771  
-204.8 1:0.640891 2:0.219644 3:0.727474 5:0.863467  
-204.8 1:0.785039 2:0.463843 3:0.542832 5:0.871396  
-204.8 1:0.811095 2:0.489525 3:0.637372 5:0.877756  
-204.8 1:0.715346 2:0.286776 3:0.482024 4:0.011236 5:0.880754  
-204.8 1:0.741963 2:0.312345 3:0.663116 5:0.88633  
-204.8 1:0.346501 2:0.508223 3:0.494452 4:0.011236 5:0.877224  
-204.8 1:0.633957 2:0.324172 3:0.531292 5:0.871592  
-204.8 1:0.587378 2:0.267966 3:0.653795 5:0.869631  
-204.8 1:0.870841 2:0.313246 3:0.61518 5:0.887703  
-204.8 1:0.728164 2:0.302884 3:0.576565 5:0.907288  
-204.8 1:0.676683 2:0.621762 3:0.570794 5:0.906167  
-204.8 1:0.875394 2:0.408538 3:0.543276 5:0.892718  
-204.8 1:0.548855 2:0.526132 3:0.451842 5:0.886106



-204.8 1:0.8527 2:0.300969 3:0.59787 5:0.909445  
-204.8 1:0.285774 2:0.177968 3:0.48158  
-204.8 1:0.285774 2:0.127619 3:0.537506  
-204.8 1:0.271556 2:0.169971 3:0.478917  
-204.8 1:0.29579 2:0.134039 3:0.530404  
-204.8 1:0.547174 2:0.356612 3:0.804705  
-204.8 1:0.279821 2:0.203649 3:0.523302  
-204.8 2:0.272697 3:0.517088  
-204.8 2:0.294774 3:0.567688  
-204.8 1:0.566506 2:0.223586 3:0.431425  
-204.8 1:0.283883 2:0.135503 3:0.520639  
-204.8 1:0.538629 2:0.241496 3:0.790502  
-204.8 1:0.553618 2:0.258729 3:0.627608  
-204.8 1:0.5906 2:0.219194 3:0.730581  
-204.8 1:0.298732 2:0.185965 3:0.530404  
-83.2280068615444 1:0.533796 2:0.202636 3:0.554816  
-204.8 1:0.269524 2:0.136292 3:0.528185  
-204.8 1:0.26182 2:0.139446 3:0.516201  
-98.49992774999733 1:0.260419 2:0.197004 3:0.471815  
-204.8 1:0.27863 2:0.213674 3:0.513094  
-204.8 1:0.49261 2:0.224375 3:0.640479  
-204.8 1:0.306927 2:0.130998 3:0.528185  
-204.8 1:0.296281 2:0.170083 3:0.482912  
-204.8 1:0.276879 2:0.151498 3:0.525522  
-204.8 1:0.265602 2:0.188669 3:0.520639  
-204.8 1:0.276319 2:0.140234 3:0.563249  
-204.8 1:0.276739 2:0.119734 3:0.51842  
-204.8 1:0.346852 2:0.189682 3:0.908566  
-204.8 1:0.438047 2:0.216941 3:0.667111  
-204.8 1:0.44267 2:0.211647 3:0.664004  
-204.8 1:0.26245 2:0.115454 3:0.520639  
-204.8 1:0.291728 2:0.167831 3:0.536174  
-204.8 1:0.324018 2:0.159045 3:0.540613  
-204.8 1:0.260209 2:0.181685 3:0.565912  
-204.8 2:0.268529 3:0.515757

-204.8 1:0.490509 2:0.22629 3:0.575233  
-204.8 1:0.538418 2:0.2451 3:0.521083  
-204.8 2:0.26346 3:0.532623  
-204.8 1:0.304896 2:0.145641 3:0.510431  
-204.8 1:0.286895 2:0.205339 3:0.49889  
-204.8 1:0.270925 2:0.186641 3:0.565468  
-204.8 1:0.293899 2:0.174251 3:0.5668  
-204.8 1:0.356167 2:0.174702 3:0.870395  
-204.8 1:0.255236 2:0.128407 3:0.536618  
-204.8 2:0.307614 3:0.573458  
-204.8 1:0.498984 2:0.162762 3:0.698624  
-204.8 1:0.285214 2:0.152962 3:0.547714  
-204.8 1:0.504238 2:0.253773 3:0.613848  
-204.8 1:0.254255 2:0.141361 3:0.535286  
-204.8 1:0.570848 2:0.174702 3:0.710164  
-204.8 1:0.523219 2:0.228542 3:0.753662  
-204.8 1:0.303565 2:0.180108 3:0.521527  
-204.8 1:0.544652 2:0.303447 3:0.78917  
-204.8 1:0.500946 2:0.275175 3:0.743897  
-204.8 1:0.258808 2:0.131449 3:0.502885  
-204.8 2:0.319779 3:0.567688  
-204.8 2:0.216603 3:0.553928  
-204.8 1:0.243959 2:0.116355 3:0.52996  
-204.8 2:0.32068 3:0.534399  
-204.8 1:0.487708 2:0.324735 3:0.727031 4:0.011236  
-204.8 1:0.534356 2:0.226628 3:0.654683  
-204.8 1:0.5567 2:0.250282 3:0.561917  
-204.8 1:0.47517 2:0.220545 3:0.583222  
-204.8 1:0.582475 2:0.226177 3:0.451398  
-204.8 1:0.552007 2:0.28351 3:0.62095  
-204.8 1:0.613574 2:0.241946 3:0.345761  
-204.8 1:0.520417 2:0.240369 3:0.562805  
-204.8 1:0.487217 2:0.17166 3:0.672881 4:0.011236  
-204.8 1:0.272326 2:0.174364 3:0.527741  
-204.8 1:0.287035 2:0.153751 3:0.565468

-204.8 1:0.283883 2:0.150372 3:0.565024  
-204.8 1:0.280591 2:0.214237 3:0.513538  
-204.8 1:0.545563 2:0.217166 3:0.632934 4:0.011236  
-204.8 1:0.549485 2:0.235864 3:0.659121  
-204.8 1:0.582966 2:0.160622 3:0.697736 4:0.011236  
-204.8 1:0.564474 2:0.299054 3:0.657346  
-204.8 1:0.58997 2:0.284186 3:0.617399  
-204.8 2:0.275287 3:0.545495  
-204.8 1:0.260699 2:0.159946 3:0.567688  
-204.8 2:0.233161 3:0.532179  
-204.8 1:0.238285 2:0.222911 3:0.537506  
-204.8 1:0.527282 2:0.226177 3:0.530404  
-204.8 1:0.491 2:0.305249 3:0.695517 4:0.011236  
-204.8 2:0.323384 3:0.482024  
-204.8 1:0.587448 2:0.124127 3:0.756325  
-204.8 1:0.67136 2:0.195877 3:0.859299  
-204.8 1:0.620228 2:0.214012 3:0.68664  
-204.8 1:0.270505 2:0.164564 3:0.568131  
-204.8 1:0.522519 2:0.313809 3:0.6751 4:0.0337079  
-204.8 1:0.567836 2:0.276977 3:0.693298  
-204.8 1:0.277859 2:0.17166 3:0.525078  
-204.8 1:0.651958 2:0.234512 3:0.774967  
-204.8 1:0.60643 2:0.261433 3:0.678651 4:0.011236  
-204.8 1:0.503747 2:0.207141 3:0.5668  
-204.8 1:0.513203 2:0.239694 3:0.57834  
-204.8 2:0.248254 3:0.540169  
-204.8 1:0.259648 2:0.166704 3:0.572126  
-204.8 1:0.50851 2:0.14519 3:0.801598 4:0.011236  
-204.8 1:0.271065 2:0.196779 3:0.50111  
-204.8 1:0.289977 2:0.15927 3:0.476254  
-204.8 1:0.319535 2:0.151385 3:0.540613  
-204.8 1:0.643202 2:0.212548 3:0.741678 4:0.011236  
-123.9297569628414 1:0.420747 2:0.161185 3:0.732801  
-204.8 2:0.270106 3:0.529072  
-204.8 1:0.497443 2:0.284524 3:0.846871

-204.8 1:0.603768 2:0.240369 3:0.636485  
-204.8 1:0.482034 2:0.20027 3:0.726587  
-93.05597251212797 2:0.345799 3:0.567688  
-204.8 1:0.488968 2:0.152512 3:0.741678  
-204.8 1:0.286895 2:0.177292 3:0.537062  
-204.8 1:0.54066 2:0.202298 3:0.611629  
-204.8 1:0.275898 2:0.201059 3:0.512206  
-204.8 1:0.657981 2:0.291732 3:0.714603  
-204.8 1:0.250263 2:0.173125 3:0.53573  
-204.8 1:0.248442 2:0.177855 3:0.567688  
-204.8 1:0.479583 2:0.180784 3:0.64403  
-3.66905189005664 1:0.27877 2:0.164789 3:0.57257  
-204.8 2:0.220545 3:0.494896  
-204.8 1:0.533796 2:0.285312 3:0.758988  
-202.9247727124492 1:0.483365 2:0.303334 3:0.673324 4:0.0337079  
-204.8 1:0.284724 2:0.178869 3:0.519308  
-204.8 1:0.2953 2:0.154089 3:0.557923  
-204.8 1:0.562443 2:0.245213 3:0.563249  
-204.8 1:0.287736 2:0.19216 3:0.516201  
-204.8 1:0.272396 2:0.219869 3:0.529072  
-204.8 1:0.29474 2:0.12683 3:0.521971  
-204.8 1:0.54024 2:0.204213 3:0.607634  
-204.8 1:0.482454 2:0.157243 3:0.744785  
-204.8 1:0.498214 2:0.126155 3:0.790945  
-204.8 1:0.59046 2:0.290493 3:0.62672  
-204.8 2:0.257828 3:0.533511  
-204.8 1:0.267003 2:0.147894 3:0.536618  
-204.8 1:0.465364 2:0.270444 3:0.780737  
-204.8 1:0.265462 2:0.149696 3:0.563693  
-204.8 1:0.276108 2:0.209957 3:0.497559  
-204.8 1:0.321706 2:0.167718 3:0.535286  
-204.8 1:0.288366 2:0.140009 3:0.513981  
-204.8 1:0.553478 2:0.207367 3:0.643142  
-204.8 1:0.269594 2:0.170984 3:0.545051  
-204.8 1:0.575261 2:0.253548 3:0.451398

-204.8 1:0.490789 2:0.181572 3:0.7581  
-204.8 1:0.591301 2:0.258955 3:0.691079  
-204.8 1:0.543952 2:0.212661 3:0.450954  
-204.8 1:0.516985 2:0.224713 3:0.579672  
-204.8 1:0.591161 2:0.258504 3:0.773635  
-204.8 1:0.564194 2:0.239468 3:0.474922  
-204.8 1:0.498354 2:0.204438 3:0.674212 4:0.011236  
-204.8 1:0.519017 2:0.311106 3:0.659565  
-204.8 1:0.266583 2:0.146317 3:0.485575  
-204.8 1:0.560622 2:0.148569 3:0.701731  
-204.8 1:0.682146 2:0.187993 3:0.790502  
-204.8 1:0.534566 2:0.2139 3:0.724368  
-204.8 1:0.290257 2:0.166929 3:0.480692  
-204.8 1:0.485886 2:0.207029 3:0.561917  
-204.8 1:0.608811 2:0.199932 3:0.731469  
-204.8 1:0.527702 2:0.288804 3:0.754549  
-204.8 1:0.546613 2:0.245663 3:0.520195  
-204.8 1:0.552007 2:0.244537 3:0.457168  
-11.79120702840683 1:0.631015 2:0.336562 3:0.671549  
-204.8 2:0.2754 3:0.502885  
-204.8 1:0.571829 2:0.246902 3:0.515757  
-204.8 1:0.568047 2:0.252309 3:0.513094  
-204.8 1:0.664425 2:0.211309 3:0.797603  
-204.8 1:0.346852 2:0.153863 3:0.526853  
-204.8 1:0.324928 2:0.16952 3:0.530404  
-204.8 1:0.529943 2:0.236878 3:0.472259  
-204.8 1:0.599216 2:0.277089 3:0.717266  
-204.8 1:0.571969 2:0.235413 3:0.521083  
-204.8 2:0.240707 3:0.491789  
-204.8 1:0.52518 2:0.224487 3:0.4585  
-204.8 1:0.286475 2:0.146767 3:0.562361  
-204.8 1:0.537438 2:0.243749 3:0.668442  
-204.8 1:0.488198 2:0.216603 3:0.679095  
-204.8 1:0.47531 2:0.217954 3:0.587217  
-204.8 1:0.446382 2:0.183938 3:0.667998

-204.8 1:0.608811 2:0.278666 3:0.638704  
-204.8 1:0.6224 2:0.113426 3:0.793609 4:0.011236  
-204.8 1:0.545843 2:0.250507 3:0.591212  
-204.8 1:0.241858 2:0.148232 3:0.494896  
-204.8 1:0.256847 2:0.138995 3:0.565912  
-204.8 1:0.57393 2:0.136517 3:0.756769 4:0.011236  
-204.8 1:0.424949 2:0.208042 3:0.796715 4:0.0224719  
-204.8 2:0.31212 3:0.482024  
-204.8 1:0.604749 2:0.228993 3:0.465601  
-204.8 1:0.536037 2:0.172111 3:0.666223 4:0.011236  
-204.8 1:0.608811 2:0.203762 3:0.42166  
-204.8 1:0.243609 2:0.16907 3:0.575233  
-62.48037053935354 1:0.477761 2:0.240257 3:0.605859  
-204.8 1:0.489879 2:0.235639 3:0.58411  
-204.8 1:0.254325 2:0.138545 3:0.547714  
-204.8 1:0.482524 2:0.144515 3:0.811363 4:0.011236  
-204.8 1:0.285564 2:0.135053 3:0.49534  
-204.8 1:0.602227 2:0.315499 3:0.65779 4:0.0224719  
-204.8 1:0.447643 2:0.0792971 3:0.844652  
-204.8 1:0.498144 2:0.303221 3:0.722148  
-204.8 1:0.26189 2:0.156004 3:0.479805  
-204.8 1:0.612874 2:0.243974 3:0.790945  
-204.8 1:0.572389 2:0.326087 3:0.671993 4:0.011236  
-204.8 1:0.528963 2:0.198693 3:0.515313  
-204.8 1:0.52434 2:0.295449 3:0.679095  
-204.8 1:0.313581 2:0.196553 3:0.538393  
-204.8 1:0.536877 2:0.221559 3:0.620506  
-204.8 1:0.547664 2:0.145641 3:0.710164  
-204.8 1:0.283113 2:0.181122 3:0.569019  
-204.8 1:0.521118 2:0.206803 3:0.469152  
-204.8 1:0.457589 2:0.155103 3:0.774967 4:0.0449438  
-204.8 1:0.559992 2:0.259067 3:0.691522 4:0.011236  
-204.8 1:0.462142 2:0.179883 3:0.782956 4:0.0449438  
-204.8 1:0.473979 2:0.212886 3:0.558367  
-204.8 1:0.395461 2:0.163888 3:0.844652

-204.8 1:0.518386 2:0.22077 3:0.484243  
-204.8 1:0.292919 2:0.148682 3:0.549933  
-204.8 2:0.316963 3:0.505992  
-204.8 1:0.27884 2:0.125929 3:0.5415  
-204.8 1:0.429012 2:0.166479 3:0.739015  
-204.8 1:0.548925 2:0.111962 3:0.770528  
-204.8 1:0.546824 2:0.211985 3:0.559254  
-204.8 1:0.521328 2:0.247128 3:0.678207  
-204.8 1:0.273097 2:0.159495 3:0.517976  
-204.8 1:0.564054 2:0.274611 3:0.814913  
-204.8 1:0.536457 2:0.179094 3:0.666667  
-204.8 1:0.271556 2:0.142938 3:0.490457  
-204.8 1:0.2946 2:0.156679 3:0.550821  
-204.8 1:0.543041 2:0.259743 3:0.574345  
-204.8 1:0.515304 2:0.195202 3:0.579672  
-204.8 1:0.604819 2:0.29421 3:0.750999  
-204.8 1:0.54059 2:0.244988 3:0.593431  
-204.8 2:0.275287 3:0.514869  
-204.8 1:0.307277 2:0.167943 3:0.557923  
-204.8 1:0.592071 2:0.189795 3:0.754549  
-204.8 1:0.522449 2:0.249718 3:0.687084 4:0.011236  
-204.8 1:0.447013 2:0.303334 3:0.733245  
-204.8 1:0.505568 2:0.208718 3:0.587661  
-105.8462769047418 1:0.521468 2:0.190921 3:0.488238  
-204.8 1:0.271205 2:0.155215 3:0.557479  
-204.8 1:0.641451 2:0.306713 3:0.799822 4:0.0224719  
-204.8 1:0.593892 2:0.259743 3:0.500222  
-204.8 1:0.286195 2:0.183487 3:0.545495  
-204.8 1:0.509841 2:0.162199 3:0.734132  
-204.8 1:0.45927 2:0.232597 3:0.648913  
-204.8 1:0.473209 2:0.229444 3:0.608522  
-204.8 1:0.534076 2:0.231246 3:0.671993  
-204.8 1:0.65637 2:0.259968 3:0.70617 4:0.011236  
-204.8 1:0.285844 2:0.171548 3:0.531735  
-204.8 1:0.473069 2:0.170196 3:0.733245

-204.8 1:0.536247 2:0.184614 3:0.628939  
-204.8 1:0.288436 2:0.151498 3:0.533511  
-204.8 1:0.679695 2:0.292971 3:0.714603 4:0.0449438  
-204.8 1:0.256917 2:0.159495 3:0.521971  
-204.8 1:0.537578 2:0.203987 3:0.595206  
-35.45615157896103 2:0.315837 3:0.459387  
-204.8 1:0.630595 2:0.292183 3:0.425211  
-204.8 1:0.494852 2:0.317414 3:0.741678  
-204.8 1:0.543251 2:0.206578 3:0.730138  
-204.8 1:0.521678 2:0.246452 3:0.591656  
-204.8 1:0.470267 2:0.218292 3:0.602752  
-204.8 1:0.595853 2:0.241721 3:0.432756  
-204.8 1:0.541921 2:0.251408 3:0.624945 4:0.011236  
-47.29227483764865 1:0.666667 2:0.242735 3:0.703063 4:0.0224719  
-204.8 1:0.560622 2:0.24938 3:0.637372  
-204.8 1:0.271836 2:0.145979 3:0.483799  
-204.8 1:0.5242 2:0.209957 3:0.54727  
-204.8 1:0.502487 2:0.220658 3:0.613848  
-204.8 1:0.266513 2:0.202974 3:0.545495  
-204.8 1:0.592632 2:0.252196 3:0.679538 4:0.0224719  
-204.8 1:0.494362 2:0.221897 3:0.520195  
-204.8 1:0.416264 2:0.27754 3:0.757656  
-204.8 1:0.283463 2:0.141361 3:0.560142  
-204.8 1:0.512222 2:0.142374 3:0.727031 4:0.011236  
-204.8 1:0.545283 2:0.226966 3:0.561917  
-204.8 1:0.500455 2:0.201059 3:0.689303  
-204.8 1:0.268964 2:0.190921 3:0.50466  
-204.8 1:0.483365 2:0.314147 3:0.714603  
-204.8 1:0.506549 2:0.235526 3:0.521971  
-204.8 2:0.321581 3:0.567688  
-204.8 1:0.255376 2:0.161523 3:0.490013  
-204.8 1:0.592001 2:0.182699 3:0.717266 4:0.011236  
-143.3836518347987 1:0.509351 2:0.189007 3:0.594763  
-204.8 1:0.54157 2:0.209507 3:0.629827  
-204.8 1:0.578203 2:0.192836 3:0.685752



-204.8 1:0.446592 2:0.22415 3:0.778074  
-204.8 1:0.404217 2:0.241834 3:0.778961  
-204.8 1:0.609582 2:0.378238 3:0.716822  
-204.8 2:0.332169 3:0.538393  
-204.8 1:0.315402 2:0.164001 3:0.543719  
-204.8 1:0.560132 2:0.187993 3:0.749223  
-204.8 1:0.542481 2:0.218856 3:0.533511  
-204.8 1:0.319815 2:0.168957 3:0.486462  
-204.8 1:0.496463 2:0.219869 3:0.594319  
-204.8 1:0.603208 2:0.305812 3:0.657346  
-204.8 1:0.444841 2:0.139896 3:0.78917 4:0.0224719  
-204.8 1:0.572319 2:0.244087 3:0.45273  
-204.8 1:0.310639 2:0.173688 3:0.549046  
-204.8 1:0.32731 2:0.171322 3:0.528185  
-204.8 1:0.478392 2:0.21007 3:0.523746  
-204.8 1:0.555999 2:0.227191 3:0.560142  
-204.8 2:0.357062 3:0.541056  
-204.8 1:0.50893 2:0.26515 3:0.711496  
-186.494278062622 1:0.625201 2:0.262897 3:0.471372  
-204.8 1:0.274988 2:0.166592 3:0.513981  
-204.8 1:0.24662 2:0.160847 3:0.520639  
-204.8 1:0.578203 2:0.261095 3:0.66134  
-204.8 1:0.270365 2:0.209169 3:0.520639  
-204.8 1:0.276459 2:0.157581 3:0.515313  
-204.8 1:0.243048 2:0.164564 3:0.522858  
-204.8 1:0.503047 2:0.314823 3:0.735908  
-204.8 1:0.254185 2:0.148119 3:0.562361  
-204.8 2:0.231696 3:0.567688  
-204.8 1:0.489809 2:0.215026 3:0.693298  
-204.8 2:0.26515 3:0.575677  
-204.8 1:0.313231 2:0.144402 3:0.51265  
-204.8 1:0.569447 2:0.24251 3:0.691079  
-204.8 1:0.521258 2:0.21649 3:0.639592  
-204.8 1:0.24585 2:0.145416 3:0.540169  
-204.8 1:0.496113 2:0.214463 3:0.565912

-204.8 2:0.279004 3:0.496227  
-204.8 1:0.308888 2:0.147781 3:0.513981  
-204.8 1:0.582195 2:0.235301 3:0.718154  
-204.8 1:0.478602 2:0.252422 3:0.730581 4:0.011236  
-204.8 1:0.516845 2:0.236652 3:0.745229  
-204.8 1:0.577432 2:0.331381 3:0.659565  
-204.8 2:0.211872 3:0.526409  
-204.8 1:0.538418 2:0.223474 3:0.711496 4:0.011236  
-204.8 1:0.242908 2:0.16524 3:0.464714  
-204.8 1:0.546263 2:0.225276 3:0.511318  
-204.8 1:0.264902 2:0.155778 3:0.51842  
-204.8 1:0.718218 2:0.140234 3:0.879272  
-204.8 1:0.273657 2:0.193512 3:0.528628  
-204.8 1:0.511662 2:0.231133 3:0.789614  
-204.8 1:0.52406 2:0.105317 3:0.773191  
-204.8 1:0.664075 2:0.117481 3:0.837994  
-204.8 1:0.498424 2:0.144852 3:0.722148 4:0.011236  
-204.8 1:0.251944 2:0.197229 3:0.530848  
-204.8 1:0.505148 2:0.207029 3:0.491345  
-204.8 1:0.546193 2:0.25704 3:0.490013  
-162.0210938826501 1:0.284163 2:0.142149 3:0.562361  
-204.8 1:0.277719 2:0.186866 3:0.504217  
-204.8 1:0.285494 2:0.204551 3:0.537949  
-204.8 1:0.288366 2:0.194864 3:0.5415  
-204.8 1:0.269594 2:0.192724 3:0.531292  
-204.8 1:0.321846 2:0.174251 3:0.530848  
-204.8 1:0.251523 2:0.160171 3:0.536618  
-204.8 1:0.285494 2:0.174814 3:0.536618  
-204.8 1:0.435666 2:0.21604 3:0.753218  
-204.8 2:0.257716 3:0.567688  
-204.8 1:0.498144 2:0.20793 3:0.617399  
-204.8 1:0.44337 2:0.228092 3:0.717266  
-204.8 1:0.55684 2:0.224825 3:0.552153  
-204.8 1:0.274427 2:0.181347 3:0.50111  
-204.8 1:0.337186 2:0.155215 3:0.507324

-204.8 1:0.304966 2:0.197905 3:0.510874  
-204.8 1:0.613154 2:0.344785 3:0.671993  
-204.8 1:0.260979 2:0.158144 3:0.508655  
-204.8 1:0.291938 2:0.189344 3:0.505104  
-204.8 1:0.554949 2:0.201622 3:0.730581  
-204.8 1:0.290047 2:0.170872 3:0.536174  
-204.8 1:0.626742 2:0.396373 3:0.748779 4:0.0224719  
-204.8 1:0.363031 2:0.181122 3:0.858855  
-204.8 1:0.264341 2:0.20838 3:0.518864  
-161.0136443549292 1:0.55817 2:0.202073 3:0.41589  
-204.8 2:0.285425 3:0.567688  
-204.8 1:0.252224 2:0.137418 3:0.494008  
-204.8 1:0.26224 2:0.191034 3:0.476698  
-204.8 2:0.294436 3:0.544163  
-204.8 1:0.513623 2:0.211759 3:0.525965  
-204.8 1:0.288996 2:0.147105 3:0.562361  
-204.8 1:0.255796 2:0.190696 3:0.506436  
-204.8 1:0.24613 2:0.192498 3:0.487794  
-204.8 2:0.238342 3:0.543719  
-204.8 1:0.260559 2:0.17977 3:0.513538  
-204.8 1:0.31176 2:0.164564 3:0.550821  
-204.8 1:0.445122 2:0.206578 3:0.695073  
-204.8 1:0.237795 2:0.145528 3:0.549046  
-204.8 1:0.552637 2:0.212548 3:0.509987  
-204.8 1:0.253345 2:0.134264 3:0.535286  
-204.8 1:0.24648 2:0.2041 3:0.544163  
-204.8 1:0.263991 2:0.166817 3:0.513981  
-204.8 1:0.252854 2:0.210295 3:0.489569  
-204.8 1:0.265392 2:0.19385 3:0.532179  
-204.8 1:0.5415 2:0.231584 3:0.509543  
-204.8 1:0.319675 2:0.193062 3:0.539281  
-204.8 1:0.27912 2:0.1426 3:0.5415  
-204.8 1:0.546824 2:0.259856 3:0.516201  
-204.8 1:0.633256 2:0.295112 3:0.675988  
-204.8 1:0.490859 2:0.294323 3:0.667111

-204.8 1:0.498284 2:0.190471 3:0.656458  
-204.8 1:0.495903 2:0.219081 3:0.511762  
-204.8 1:0.288296 2:0.162987 3:0.477142  
-204.8 1:0.490369 2:0.202748 3:0.510431  
-204.8 1:0.264201 2:0.145754 3:0.521971  
-204.8 1:0.555159 2:0.248817 3:0.715934  
-204.8 1:0.307698 2:0.15927 3:0.520195  
-204.8 1:0.270575 2:0.129196 3:0.527741  
-204.8 1:0.527772 2:0.198581 3:0.654239 4:0.011236  
-204.8 1:0.5574 2:0.249493 3:0.614736 4:0.0224719  
-204.8 1:0.584086 2:0.230908 3:0.870395  
-82.92330241000843 1:0.563704 2:0.0725389 3:0.785175  
-204.8 1:0.542271 2:0.363032 3:0.720373  
-204.8 1:0.510331 2:0.0988961 3:0.794052 4:0.0337079  
-204.8 2:0.234062 3:0.48158  
-204.8 1:0.279821 2:0.18957 3:0.533511  
-204.8 1:0.249002 2:0.158482 3:0.494008  
-204.8 1:0.489459 2:0.256139 3:0.631158  
-204.8 2:0.233273 3:0.488238  
-204.8 1:0.266092 2:0.150935 3:0.544163  
-204.8 1:0.290257 2:0.139671 3:0.516644  
-204.8 1:0.252154 2:0.187993 3:0.515313  
-204.8 2:0.212886 3:0.536174  
-204.8 1:0.298522 2:0.162649 3:0.477142  
-204.8 1:0.313791 2:0.178306 3:0.551709  
-204.8 1:0.579604 2:0.280581 3:0.696849 4:0.0224719  
-204.8 1:0.282552 2:0.155215 3:0.563693  
-204.8 1:0.249772 2:0.18788 3:0.525522  
-204.8 2:0.243298 3:0.540169  
-204.8 1:0.273377 2:0.192949 3:0.531735  
-204.8 1:0.26294 2:0.152962 3:0.49534  
-204.8 2:0.228092 3:0.492676  
-204.8 1:0.307277 2:0.156454 3:0.484243  
-204.8 1:0.318484 2:0.193963 3:0.51265  
-204.8 1:0.267493 2:0.141248 3:0.566356

-204.8 1:0.258808 2:0.198919 3:0.500666  
-204.8 1:0.448624 2:0.214012 3:0.743009  
-204.8 1:0.249772 2:0.15071 3:0.576121  
-204.8 1:0.485326 2:0.37362 3:0.810919  
-204.8 1:0.585487 2:0.241271 3:0.505104  
-204.8 1:0.257267 2:0.117144 3:0.50111  
-204.8 1:0.538629 2:0.229331 3:0.624057  
-204.8 1:0.487287 2:0.186641 3:0.6751 4:0.011236  
-204.8 1:0.277859 2:0.16355 3:0.528628  
-204.8 1:0.332493 2:0.184726 3:0.530404  
-204.8 2:0.27112 3:0.538837  
-204.8 1:0.52427 2:0.259067 3:0.632046  
-204.8 1:0.583456 2:0.187768 3:0.738127  
-204.8 2:0.323722 3:0.537949  
-204.8 1:0.527072 2:0.246902 3:0.581891  
-41.2243149611345 1:0.249772 2:0.111061 3:0.494452  
-204.8 2:0.24938 3:0.567688  
-204.8 1:0.276319 2:0.164114 3:0.477585  
-204.8 2:0.286438 3:0.575677  
-204.8 1:0.280731 2:0.147218 3:0.492676  
-204.8 2:0.322483 3:0.545495  
-204.8 2:0.283735 3:0.573901  
-204.8 1:0.259158 2:0.194864 3:0.545051  
-204.8 1:0.2953 2:0.13708 3:0.535286  
-204.8 2:0.27112 3:0.521527  
-204.8 1:0.340758 2:0.160284 3:0.509099  
-204.8 1:0.259228 2:0.194301 3:0.509987  
-204.8 2:0.29759 3:0.567688  
-204.8 2:0.268867 3:0.537949  
-204.8 1:0.286405 2:0.163888 3:0.562361  
-204.8 1:0.554598 2:0.210633 3:0.485575  
-204.8 1:0.632066 2:0.216152 3:0.71549  
-204.8 1:0.328991 2:0.154539 3:0.540169  
-204.8 1:0.63949 2:0.32879 3:0.723036  
-204.8 2:0.272922 3:0.567688

-204.8 1:0.283113 2:0.176729 3:0.49534  
-204.8 2:0.325524 3:0.537949  
-204.8 2:0.286326 3:0.537949  
-204.8 2:0.314373 3:0.567688  
-204.8 1:0.291938 2:0.185515 3:0.482468  
-204.8 1:0.294179 2:0.160396 3:0.559698  
-204.8 1:0.420256 2:0.190133 3:0.741678  
-204.8 2:0.233499 3:0.567688  
-204.8 2:0.281032 3:0.461607  
-204.8 1:0.286475 2:0.146767 3:0.533511  
-204.8 1:0.517826 2:0.241271 3:0.647581 4:0.011236  
-204.8 1:0.468306 2:0.202073 3:0.618287  
-204.8 2:0.263235 3:0.567688  
-204.8 2:0.267177 3:0.567688  
-204.8 2:0.275287 3:0.496671  
-204.8 2:0.297364 3:0.567688  
-204.8 2:0.278666 3:0.57834  
-204.8 1:0.287245 2:0.167155 3:0.565912  
-204.8 2:0.252872 3:0.530848  
-204.8 2:0.357851 3:0.52996  
-204.8 2:0.342532 3:0.515313  
-204.8 2:0.238117 3:0.526409  
-204.8 2:0.277765 3:0.504217  
-204.8 2:0.237328 3:0.567688  
-204.8 1:0.243959 2:0.211196 3:0.50111  
-204.8 2:0.274724 3:0.567688  
-204.8 2:0.231021 3:0.567688  
-204.8 2:0.264136 3:0.567688  
-204.8 1:0.291588 2:0.134828 3:0.537949  
-204.8 2:0.246114 3:0.564581  
-204.8 1:0.271906 2:0.157806 3:0.54727  
-204.8 1:0.304826 2:0.181798 3:0.546383  
-204.8 1:0.638159 2:0.238342 3:0.764758 4:0.0224719  
-204.8 1:0.274427 2:0.139784 3:0.48158  
-204.8 1:0.301044 2:0.130435 3:0.520639

-204.8 1:0.273937 2:0.141473 3:0.477142  
-204.8 2:0.295675 3:0.488238  
-204.8 1:0.560692 2:0.167943 3:0.70617 4:0.0224719  
-204.8 1:0.476641 2:0.207029 3:0.528185  
-204.8 2:0.229669 3:0.521971  
-204.8 1:0.55719 2:0.139671 3:0.767421  
-204.8 1:0.308608 2:0.154427 3:0.490457  
-204.8 2:0.256251 3:0.576565  
-204.8 2:0.261207 3:0.567688  
-204.8 1:0.303845 2:0.138883 3:0.538837  
-204.8 2:0.279793 3:0.475366  
-204.8 1:0.520487 2:0.238455 3:0.543276  
-204.8 1:0.3119 2:0.178081 3:0.532179  
-204.8 1:0.52392 2:0.229444 3:0.730138  
-204.8 2:0.231358 3:0.567688  
-204.8 2:0.290381 3:0.567688  
-204.8 2:0.228317 3:0.524634  
-204.8 2:0.319667 3:0.567688  
-204.8 2:0.239806 3:0.567688  
-74.76986253229506 2:0.230457 3:0.567688  
-204.8 2:0.255688 3:0.567688  
-204.8 1:0.49261 2:0.211647 3:0.62672  
-204.8 2:0.232935 3:0.488682  
-204.8 2:0.246452 3:0.567688  
-204.8 1:0.24529 2:0.124578 3:0.497559  
-204.8 2:0.374296 3:0.527297  
-204.8 1:0.269594 2:0.120748 3:0.501997  
-204.8 2:0.305362 3:0.477585  
-204.8 2:0.297026 3:0.567688  
-204.8 2:0.266164 3:0.526409 4:0.011236  
-204.8 2:0.318202 3:0.475366  
-204.8 2:0.240707 3:0.567688  
-204.8 1:0.275758 2:0.161973 3:0.502885  
-204.8 1:0.256006 2:0.134039 3:0.521527  
-204.8 2:0.233611 3:0.567688

-204.8 2:0.240144 3:0.567688  
-204.8 2:0.268754 3:0.553928  
-204.8 2:0.238229 3:0.567688  
-204.8 2:0.286664 3:0.534399  
-204.8 2:0.326425 3:0.534399  
-204.8 2:0.260532 3:0.537506  
-204.8 2:0.257828 3:0.567688  
-204.8 2:0.267853 3:0.538393  
-204.8 2:0.229556 3:0.511318  
-204.8 2:0.284749 3:0.567688  
-204.8 2:0.296238 3:0.567688  
-204.8 2:0.314147 3:0.472259  
-204.8 1:0.290537 2:0.127844 3:0.539281  
-204.8 2:0.247015 3:0.567688  
-204.8 2:0.278892 3:0.552153



## \* PaCa prediction model

svm\_type c\_svc

kernel\_type rbf

gamma 4

nr\_class 2

total\_sv 2250

rho -4.50772

label -1 1

probA -0.610854

probB -4.69813

nr\_sv 2228 22

SV

1.28 1:0.619476 2:0.203785 3:0.641462 5:0.595195

1.28 1:0.263209 2:0.162522 3:0.736602 5:0.630701

1.28 1:0.737209 2:0.325814 3:0.560449 5:0.607509

1.28 1:0.316325 2:0.177157 3:0.643955 5:0.778409

1.28 1:0.287327 2:0.177047 3:0.848359 4:0.0909091 5:0.721691

1.28 1:0.41224 2:0.390075 3:0.684254 4:0.0909091

1.28 1:0.614596 2:0.376761 3:0.651018 5:0.840036

1.28 1:0.318207 2:0.253521 3:0.75322 4:0.181818 5:0.809524

1.28 1:0.330197 2:0.352223 3:0.843373 5:0.678923

1.28 1:0.255751 2:0.248019 3:0.702119 4:0.0909091

1.28 1:0.410846 2:0.279049 3:0.731201

1.28 1:0.287327 2:0.241637 3:0.746157 5:0.762192

1.28 1:0.309355 2:0.357174 3:0.560033 5:0.661902

1.28 1:0.266416 2:0.275088 3:0.724969 5:0.652717

1.28 1:0.429667 2:0.317452 3:0.739094 4:0.0909091

1.28 1:0.259097 2:0.221391 3:0.761529 5:0.591865

1.28 1:0.403039 2:0.138094 3:0.738263 5:0.779012

1.28 1:0.296459 2:0.263094 3:0.75322 5:0.698642

1.28 1:0.319392 2:0.247469 3:0.680931 4:0.181818

1.28 1:0.251568 2:0.164173 3:0.562941 5:0.729269

1.28 1:0.309285 2:0.234155 3:0.724969 5:0.649158

1.28 1:0.322529 2:0.333517 3:0.704612

1.28 1:0.708281 2:0.31151 3:0.724969 5:0.748759

1.28 1:0.457689 2:0.270467 3:0.769423 5:0.827234  
1.28 1:0.270668 2:0.128961 3:0.421687 5:0.683142  
1.28 1:0.32455 2:0.215119 3:0.420025 5:0.679468  
1.28 1:0.347414 2:0.198504 3:0.420025 5:0.69847  
1.28 1:0.287258 2:0.166153 3:0.678853 5:0.765808  
1.28 1:0.250732 2:0.18607 3:0.70295 5:0.721691  
1.28 1:0.281821 2:0.184199 3:0.610303 5:0.699647  
1.28 1:0.291858 2:0.204115 3:0.681762 4:0.272727 5:0.704469  
1.28 1:0.31751 2:0.235255 3:0.51558 4:0.181818 5:0.554953  
1.28 1:0.796947 2:0.169014 3:0.792273 5:0.664227  
1.28 1:0.328245 2:0.277619 3:0.555879 4:0.0909091 5:0.742358  
1.28 1:0.269274 2:0.211928 3:0.646863 4:0.0909091 5:0.694767  
1.28 1:0.267949 2:0.195973 3:0.70752 5:0.62984  
1.28 1:0.881849 2:0.104643 3:0.665559 5:0.82089  
1.28 1:0.816674 2:0.335167 3:0.646032 5:0.721519  
1.28 1:0.844765 2:0.209177 3:0.617781 5:0.721519  
1.28 1:0.287258 2:0.162192 3:0.75322 5:0.67324  
1.28 1:0.814722 2:0.31349 3:0.672622 5:0.641465  
1.28 1:0.77729 2:0.206096 3:0.670129 5:0.844427  
1.28 1:0.719225 2:0.225572 3:0.6801 5:0.677115  
1.28 1:0.696152 2:0.204555 3:0.52098 5:0.588737  
1.28 1:0.390562 2:0.37434 3:0.692563 5:0.701742  
1.28 1:0.772829 2:0.272447 3:0.745326 5:0.748185  
1.28 1:0.365537 2:0.415933 3:0.648941 5:0.692729  
1.28 1:0.506274 2:0.121809 3:0.621936 5:0.555556  
1.28 1:0.370208 2:0.25088 3:0.694225 5:0.713195  
1.28 1:0.270807 2:0.24956 3:0.705027 4:0.0909091  
1.28 1:0.273595 2:0.162742 3:0.612796 5:0.651683  
1.28 1:0.318416 2:0.117628 3:0.696302 5:0.618129  
1.28 1:0.351108 2:0.247469 3:0.60698 5:0.728724  
1.28 1:0.336749 2:0.354203 3:0.895305 4:0.0909091 5:0.732857  
1.28 1:0.448209 2:0.143156 3:0.522227 5:0.752978  
1.28 1:0.36965 2:0.18673 3:0.788118 5:0.710526  
1.28 1:0.260839 2:0.163292 3:0.704196 5:0.61655  
1.28 1:0.925972 2:0.241967 3:0.760283 5:0.831396

1.28 1:0.626934 2:0.413622 3:0.730785 5:0.826143  
1.28 1:0.287746 2:0.234705 3:0.76236 5:0.687477  
1.28 1:0.335773 2:0.325044 3:0.713336 5:0.692041  
0.3934952995931695 1:0.343232 2:0.081206 3:0.727046 4:0.0909091 5:0.707167  
1.28 1:0.260072 2:0.177157 3:0.685501 5:0.621459  
1.28 1:0.765788 2:0.163952 3:0.799751 5:0.706392  
1.28 1:0.262861 2:0.225572 3:0.727462 5:0.624272  
1.28 1:0.742855 2:0.372029 3:0.633153 5:0.825167  
1.28 1:0.287118 2:0.227003 3:0.754466 5:0.605126  
1.28 1:0.364562 2:0.263314 3:0.73037 5:0.717443  
1.28 1:0.339049 2:0.351232 3:0.662651 5:0.703723  
1.28 1:0.320786 2:0.163292 3:0.742002 5:0.576739  
1.28 1:0.369023 2:0.175836 3:0.66182 5:0.706679  
1.28 1:0.288443 2:0.158451 3:0.702119 5:0.745888  
1.28 1:0.804196 2:0.132152 3:0.837973 5:0.665289  
1.28 1:0.544403 2:0.175066 3:0.616535 5:0.739832  
1.28 1:0.292765 2:0.331206 3:0.705027 4:0.181818 5:0.694767  
1.28 1:0.300781 2:0.323173 3:0.692148 5:0.777606  
1.28 1:0.6185 2:0.382482 3:0.615289 5:0.836046  
1.28 1:0.277917 2:0.143266 3:0.722061 5:0.636959  
1.28 1:0.321135 2:0.356624 3:0.665559  
1.28 1:0.506971 2:0.372139 3:0.61155 5:0.873102  
1.28 1:0.793252 2:0.40504 3:0.808475 5:0.810557  
1.28 1:0.795762 2:0.277619 3:0.683839 5:0.799506  
1.28 1:0.309633 2:0.15471 3:0.700457 5:0.666322  
1.28 1:0.809076 2:0.299846 3:0.826755 5:0.804242  
1.28 1:0.285515 2:0.209617 3:0.755297 4:0.272727 5:0.675421  
1.28 1:0.437195 2:0.422205 3:0.655172 5:0.705273  
1.28 1:0.296807 2:0.0956206 3:0.643955 5:0.790953  
1.28 1:0.406315 2:0.1864 3:0.713336 5:0.758403  
1.28 1:0.279939 2:0.222051 3:0.727462 5:0.732225  
1.28 1:0.317719 2:0.158341 3:0.729954 4:0.181818 5:0.694624  
1.28 1:0.367977 2:0.211488 3:0.468218 4:0.181818 5:0.734206  
1.28 1:0.359403 2:0.159001 3:0.46988 5:0.721318  
1.28 1:0.334518 2:0.295885 3:0.738263 4:0.363636 5:0.667643

1.28 1:0.376202 2:0.24923 3:0.640631 5:0.624731  
1.28 1:0.340722 2:0.245709 3:0.640631 5:0.675393  
1.28 1:0.271295 2:0.176496 3:0.639801 5:0.541548  
1.28 1:0.329987 2:0.194102 3:0.684254 5:0.674876  
1.28 1:0.308518 2:0.353433 3:0.673868 5:0.69471  
1.28 1:0.373344 2:0.25132 3:0.720814 5:0.680645  
1.28 1:0.621009 2:0.261994 3:0.560449 5:0.678894  
1.28 1:0.321414 2:0.113556 3:0.742833 4:0.0909091 5:0.632567  
1.28 1:0.301896 2:0.268046 3:0.720399 4:0.181818 5:0.645455  
1.28 1:0.280148 2:0.246259 3:0.734524 5:0.797641  
1.28 1:0.335285 2:0.298746 3:0.713336  
1.28 1:0.389586 2:0.137324 3:0.641047 5:0.870232  
1.28 1:0.273386 2:0.210167 3:0.683839 4:0.0909091 5:0.778208  
1.28 1:0.680329 2:0.174846 3:0.703365 5:0.769368  
1.28 1:0.259236 2:0.192892 3:0.605733 5:0.682052  
1.28 1:0.298202 2:0.153829 3:0.605733 5:0.652487  
1.28 1:0.267182 2:0.262984 3:0.604071 5:0.72017  
1.28 1:0.280217 2:0.258033 3:0.705027 4:0.181818 5:0.765895  
1.28 1:0.669176 2:0.190911 3:0.737432 5:0.6398  
1.28 1:0.726405 2:0.163732 3:0.748234 5:0.729097  
1.28 1:0.901018 2:0.262104 3:0.636477 5:0.767875  
1.28 1:0.620382 2:0.131712 3:0.47445 4:0.0909091 5:0.859525  
1.28 1:0.362401 2:0.15757 3:0.708351 5:0.651884  
1.28 1:0.589851 2:0.264415 3:0.897798  
1.28 1:0.808448 2:0.363336 3:0.692563 5:0.776572  
1.28 1:0.251847 2:0.288622 3:0.647694 5:0.658084  
1.28 1:0.433082 2:0.409221 3:0.683839 5:0.7361  
1.28 1:0.281333 2:0.257042 3:0.463232 5:0.713338  
1.28 1:0.316255 2:0.202135 3:0.732032 5:0.773989  
1.28 1:0.501185 2:0.165823 3:0.47445 5:0.646603  
1.28 1:0.482643 2:0.491747 3:0.759452 4:0.181818  
1.28 1:0.291858 2:0.255172 3:0.713336 5:0.655817  
1.28 1:0.380733 2:0.211598 3:0.737848 5:0.727891  
1.28 1:0.373484 2:0.160431 3:0.737848 5:0.683544  
1.28 1:0.304754 2:0.241087 3:0.825924 5:0.640317

1.28 1:0.398508 2:0.184639 3:0.700872 5:0.730762  
1.28 1:0.248432 2:0.153059 3:0.613627 4:0.181818 5:0.672006  
1.28 1:0.305172 2:0.159881 3:0.669713  
1.28 1:0.564199 2:0.240317 3:0.642709 5:0.74319  
1.28 1:0.27715 2:0.24956 3:0.749481 5:0.713539  
1.28 1:0.260491 2:0.240977 3:0.803905 5:0.57826  
1.28 1:0.249268 2:0.278279 3:0.766099 4:0.0909091 5:0.625678  
1.28 1:0.514778 2:0.1557 3:0.601579 5:0.741583  
1.28 1:0.379269 2:0.148768 3:0.610719 5:0.805735  
1.28 1:0.285933 2:0.134133 3:0.47445 5:0.648239  
1.28 1:0.491008 2:0.222601 3:0.542584 5:0.774793  
1.28 1:0.781681 2:0.199054 3:0.60698 5:0.838514  
1.28 1:0.245992 2:0.199824 3:0.613627 5:0.641408  
1.28 1:0.366513 2:0.176607 3:0.750727 5:0.753466  
1.28 1:0.658372 2:0.207196 3:0.554217 5:0.782944  
1.28 1:0.425206 2:0.546105 3:0.614873 5:0.75625  
1.28 1:0.521469 2:0.213248 3:0.669713 5:0.837137  
1.28 1:0.674265 2:0.184639 3:0.729539 5:0.682683  
1.28 1:0.477276 2:0.212038 3:0.669713 5:0.806194  
1.28 1:0.796947 2:0.257482 3:0.779393 5:0.75338  
1.28 1:0.331382 2:0.463578 3:0.60698 5:0.638279  
1.28 1:0.299387 2:0.178037 3:0.749481 5:0.654697  
1.28 1:0.666945 2:0.59232 3:0.435812 5:0.817245  
1.28 1:0.7156 2:0.265405 3:0.717491 5:0.880766  
1.28 1:0.740276 2:0.192011 3:0.560449 5:0.768851  
1.28 1:0.699498 2:0.200814 3:0.59784 5:0.645369  
1.28 1:0.285445 2:0.276408 3:0.643955 5:0.71575  
1.28 1:0.290116 2:0.203015 3:0.68467 4:0.181818 5:0.742185  
1.28 1:0.631883 2:0.165933 3:0.676776 5:0.765608  
1.28 1:0.630977 2:0.176607 3:0.477358 5:0.767818  
1.28 1:0.31033 2:0.264525 3:0.75779 5:0.740463  
1.28 1:0.57117 2:0.162852 3:0.52098 5:0.741898  
1.28 1:0.632371 2:0.233385 3:0.683839 5:0.722093  
1.28 1:0.253381 2:0.158451 3:0.732447 5:0.68719  
1.28 1:0.294298 2:0.163292 3:0.750312 5:0.719079

1.28 1:0.473791 2:0.200924 3:0.525966 4:0.0909091 5:0.76466  
1.28 1:0.268367 2:0.181668 3:0.791442 5:0.72792  
1.28 1:0.622125 2:0.339129 3:0.700042 5:0.777232  
1.28 1:0.308239 2:0.208077 3:0.609057 5:0.721548  
1.28 1:0.900809 2:0.558319 3:0.755713 5:0.885215  
1.28 1:0.795762 2:0.43662 3:0.75322 5:0.860214  
1.28 1:0.816604 2:0.210497 3:0.693394 5:0.811074  
1.28 1:0.686672 2:0.235915 3:0.687162 5:0.740262  
1.28 1:0.520075 2:0.28004 3:0.791026 4:0.0909091  
1.28 1:0.342604 2:0.327355 3:0.729539  
1.28 1:0.320229 2:0.359595 3:0.700042 5:0.686099  
1.28 1:0.333682 2:0.356074 3:0.838803 5:0.670255  
1.28 1:0.472257 2:0.136884 3:0.609472 5:0.665719  
1.28 1:0.248432 2:0.243948 3:0.754051 5:0.554522  
1.28 1:0.275199 2:0.140625 3:0.644786 5:0.745142  
1.28 1:0.282239 2:0.169454 3:0.738263 5:0.642097  
1.28 1:0.267322 2:0.110255 3:0.738263 4:0.0909091 5:0.524843  
1.28 1:0.368744 2:0.178037 3:0.471541 5:0.665691  
1.28 1:0.362261 2:0.310189 3:0.745326 5:0.683745  
1.28 1:0.268367 2:0.361136 3:0.686747 5:0.721634  
1.28 1:0.306009 2:0.299736 3:0.648525 4:0.0909091 5:0.683745  
1.28 1:0.277847 2:0.233935 3:0.759867 4:0.0909091 5:0.598238  
1.28 1:0.457828 2:0.191791 3:0.482343 5:0.823072  
1.28 1:0.456991 2:0.18695 3:0.684254 5:0.809696  
1.28 1:0.3792 2:0.200484 3:0.60241 5:0.725337  
1.28 1:0.339677 2:0.40515 3:0.729954 5:0.634921  
1.28 1:0.356267 2:0.21743 3:0.719152 4:0.181818  
1.28 1:0.273456 2:0.12478 3:0.739094 5:0.601424  
0.6890631914546315 1:0.681584 2:0.115867 3:0.514333 4:0.181818 5:0.770803  
1.28 1:0.37683 2:0.245599 3:0.751143 4:0.0909091 5:0.714257  
1.28 1:0.393071 2:0.309749 3:0.683423 5:0.682425  
1.28 1:0.256378 2:0.114217 3:0.727462 5:0.641522  
1.28 1:0.528858 2:0.175946 3:0.47445 5:0.818479  
1.28 1:0.286909 2:0.251871 3:0.742002 5:0.60372  
1.28 1:0.573958 2:0.211708 3:0.601163 5:0.606188

1.28 1:0.490171 2:0.28268 3:0.619443 5:0.796263  
1.28 1:0.272689 2:0.146567 3:0.779809 5:0.778639  
1.28 1:0.290604 2:0.0988116 3:0.732447 5:0.690491  
1.28 1:0.74397 2:0.12445 3:0.834649 5:0.654324  
1.28 1:0.252614 2:0.15526 3:0.609472 5:0.770631  
1.28 1:0.261815 2:0.162852 3:0.725384 5:0.673814  
1.28 1:0.296947 2:0.385673 3:0.744911 5:0.820316  
1.28 1:0.261257 2:0.144806 3:0.797258 4:0.181818 5:0.638394  
1.28 1:0.262721 2:0.177597 3:0.778147 5:0.729814  
1.28 1:0.290534 2:0.40614 3:0.778147 5:0.666408  
1.28 1:0.732887 2:0.21809 3:0.771915 5:0.834754  
1.28 1:0.541126 2:0.176056 3:0.5887 5:0.698843  
1.28 1:0.284539 2:0.194212 3:0.660989 5:0.636011  
1.28 1:0.355709 2:0.230634 3:0.638139 5:0.745659  
1.28 1:0.31054 2:0.125 3:0.777732 4:0.0909091 5:0.667872  
1.28 1:0.693782 2:0.24912 3:0.683839 5:0.574844  
1.28 1:0.325317 2:0.0653609 3:0.799335 5:0.589827  
1.28 1:0.676286 2:0.243838 3:0.62526 5:0.739832  
1.28 1:0.272968 2:0.28026 3:0.641047 5:0.62387  
1.28 1:0.587272 2:0.357174 3:0.746572 5:0.826057  
1.28 1:0.308448 2:0.193882 3:0.789364 4:0.181818 5:0.702546  
1.28 1:0.251987 2:0.132152 3:0.6801 5:0.623095  
0.9300456600005673 1:0.476649 2:0.139085 3:0.69838 5:0.793565  
1.28 1:0.659557 2:0.283561 3:0.522642 5:0.870605  
1.28 2:0.208077 3:0.720814 5:0.864204  
1.28 2:0.204115 3:0.720814 5:0.87072  
1.28 1:0.449882 2:0.185849 3:0.705027 5:0.84592  
1.28 1:0.824062 2:0.234815 3:0.665559 5:0.773386  
1.28 1:0.310749 2:0.197293 3:0.680931 4:0.181818 5:0.589225  
1.28 1:0.280217 2:0.12577 3:0.680931 5:0.518901  
1.28 1:0.314513 2:0.15724 3:0.593685 5:0.572003  
1.28 1:0.325735 2:0.177487 3:0.738263 5:0.728953  
1.28 1:0.517217 2:0.222051 3:0.684254 5:0.782456  
1.28 1:0.247316 2:0.138314 3:0.788533 5:0.522288  
1.28 1:0.278057 2:0.28037 3:0.750727 4:0.0909091 5:0.745515

1.28 1:0.719713 2:0.205106 3:0.613211 5:0.739774  
1.28 1:0.326572 2:0.285101 3:0.638554 5:0.709291  
1.28 1:0.947302 2:0.295004 3:0.603656 5:0.762881  
1.28 1:0.297017 2:0.243618 3:0.642709 5:0.770975  
1.28 1:0.715879 2:0.289283 3:0.704196 5:0.81159  
1.28 1:0.801687 2:0.216769 3:0.756959 5:0.697552  
1.28 1:0.280775 2:0.18684 3:0.693394 4:0.181818 5:0.720945  
0.590523516536299 1:0.286003 2:0.133693 3:0.651433  
1.28 1:0.562178 2:0.167364 3:0.714582 5:0.87537  
1.28 1:0.314095 2:0.175616 3:0.756543 4:0.0909091 5:0.612101  
1.28 1:0.731284 2:0.303917 3:0.674283 5:0.834984  
1.28 1:0.445142 2:0.199054 3:0.611134 5:0.690261  
1.28 1:0.325108 2:0.18662 3:0.788533 5:0.679612  
1.28 1:0.579813 2:0.329335 3:0.517657 5:0.820144  
1.28 2:0.131052 3:0.664312 5:0.800855  
1.28 1:0.318068 2:0.427487 3:0.688409 5:0.699647  
1.28 1:0.875436 2:0.145577 3:0.786872 4:0.0909091 5:0.788599  
1.28 1:0.703123 2:0.204005 3:0.724553 5:0.775281  
1.28 1:0.260839 2:0.228103 3:0.745326 5:0.675967  
1.28 1:0.493169 2:0.231844 3:0.857084  
1.28 1:0.28196 2:0.225902 3:0.800166 4:0.0909091 5:0.786705  
1.28 1:0.294577 2:0.137434 3:0.787703 4:0.0909091 5:0.644048  
1.28 1:0.380036 2:0.119168 3:0.787703 5:0.780246  
1.28 1:0.388122 2:0.142165 3:0.751143 5:0.729527  
1.28 1:0.38387 2:0.237566 3:0.751143 5:0.764833  
1.28 1:0.294368 2:0.226122 3:0.738679 4:0.181818 5:0.761388  
1.28 1:0.330615 2:0.176937 3:0.738679 5:0.702345  
1.28 1:0.301896 2:0.151408 3:0.738679 5:0.744654  
1.28 1:0.246131 2:0.212368 3:0.738679 5:0.62585  
1.28 1:0.361285 2:0.172755 3:0.751143 5:0.761446  
1.28 1:0.473233 2:0.323504 3:0.731201 5:0.779902  
1.28 1:0.370835 2:0.213138 3:0.713336 5:0.74319  
1.28 1:0.391119 2:0.206866 3:0.733693  
1.28 1:0.249826 2:0.18827 3:0.605733 5:0.515686  
1.28 1:0.686881 2:0.150968 3:0.74408 5:0.754413



1.28 1:0.331242 2:0.182438 3:0.641462 5:0.627802  
1.28 1:0.335912 2:0.0408231 3:0.602825 5:0.626051  
1.28 1:0.72041 2:0.25154 3:0.456585 4:0.0909091 5:0.720256  
1.28 1:0.253032 2:0.175286 3:0.605318 5:0.602572  
1.28 1:0.77011 2:0.0929798 3:0.765683 5:0.871466  
1.28 1:0.550467 2:0.15636 3:0.611134 5:0.740348  
1.28 1:0.325875 2:0.154489 3:0.764022 5:0.678005  
1.28 1:0.522376 2:0.214349 3:0.574574 5:0.800941  
1.28 1:0.335215 2:0.209287 3:0.752389 5:0.795861  
1.28 2:0.146787 3:0.760698 5:0.696777  
1.28 1:0.311237 2:0.230524 3:0.756543 5:0.742702  
1.28 1:0.254217 2:0.177157 3:0.709597 5:0.672235  
1.28 1:0.729611 2:0.120158 3:0.562111 4:0.181818 5:0.692729  
1.28 1:0.281124 2:0.136884 3:0.709597 4:0.0909091 5:0.682367  
1.28 1:0.326014 2:0.178477 3:0.610719 4:0.181818 5:0.65375  
1.28 1:0.27262 2:0.170445 3:0.614873 5:0.555728  
1.28 1:0.306218 2:0.142496 3:0.614873 5:0.611613  
1.28 1:0.745853 2:0.15603 3:0.773993 5:0.681535  
1.28 1:0.361843 2:0.164943 3:0.756128 5:0.770717  
1.28 1:0.27004 2:0.152179 3:0.669713 5:0.754987  
1.28 1:0.322738 2:0.243618 3:0.670544  
1.28 1:0.265161 2:0.278719 3:0.724553 5:0.633629  
1.28 1:0.251847 2:0.267716 3:0.699211 4:0.272727 5:0.633026  
1.28 1:0.298899 2:0.507152 3:0.729954 4:0.181818  
1.28 1:0.354733 2:0.192121 3:0.752389 5:0.724016  
1.28 1:0.376133 2:0.273107 3:0.754051 5:0.78039  
1.28 1:0.317998 2:0.113226 3:0.751143 5:0.687534  
1.28 1:0.271225 2:0.231074 3:0.742833 5:0.679181  
1.28 1:0.306636 2:0.25022 3:0.730785 5:0.746979  
1.28 1:0.284888 2:0.259683 3:0.767761 4:0.181818 5:0.697953  
1.28 1:0.271365 2:0.224802 3:0.773993 5:0.682339  
1.28 1:0.351736 2:0.145136 3:0.730785 4:0.0909091  
1.28 1:0.304615 2:0.148217 3:0.730785 5:0.590976  
1.28 1:0.328105 2:0.182879 3:0.560864 5:0.629811  
1.28 1:0.729681 2:0.259903 3:0.709597 5:0.638767

1.28 1:0.631396 2:0.202795 3:0.461155 5:0.580183  
1.28 1:0.76544 2:0.12456 3:0.760698 5:0.799191  
1.28 1:0.266695 2:0.225902 3:0.737848 5:0.647837  
1.28 1:0.776732 2:0.169784 3:0.753635 5:0.718677  
1.28 1:0.290325 2:0.136444 3:0.687162 5:0.625248  
1.28 1:0.633208 2:0.271457 3:0.742418 5:0.821895  
1.28 1:0.755611 2:0.190801 3:0.751558 5:0.76578  
1.28 1:0.287606 2:0.377311 3:0.694641 5:0.696174  
1.28 1:0.511711 2:0.191351 3:0.77607 4:0.0909091  
1.28 1:0.411334 2:0.264195 3:0.67096 5:0.752949  
1.28 1:0.273177 2:0.315141 3:0.747819 4:0.181818 5:0.670656  
1.28 1:0.314234 2:0.170555 3:0.765268 5:0.732972  
1.28 1:0.491426 2:0.266615 3:0.648941 5:0.749734  
1.28 1:0.301617 2:0.195423 3:0.703365 5:0.72238  
1.28 1:0.269762 2:0.225352 3:0.840881 5:0.632911  
1.28 1:0.814095 2:0.294234 3:0.831325 5:0.771894  
1.28 1:0.598843 2:0.238226 3:0.577067 5:0.811275  
1.28 1:0.26788 2:0.129952 3:0.517657 5:0.835041  
1.28 1:0.729681 2:0.377531 3:0.690486 5:0.865323  
1.28 1:0.440402 2:0.209617 3:0.709597 5:0.778581  
1.28 1:0.492332 2:0.103983 3:0.637723 5:0.684951  
1.28 1:0.455597 2:0.147227 3:0.406315 5:0.793766  
1.28 1:0.484037 2:0.28224 3:0.395098 5:0.878125  
1.28 1:0.280775 2:0.222381 3:0.767345 5:0.674847  
1.28 1:0.310609 2:0.290933 3:0.703365 5:0.843193  
1.28 1:0.766416 2:0.240867 3:0.713752 5:0.65131  
1.28 1:0.554649 2:0.191571 3:0.700872 5:0.843853  
1.28 1:0.402551 2:0.21919 3:0.767345 5:0.817647  
1.28 1:0.297017 2:0.241417 3:0.7715 5:0.617612  
1.28 1:0.25582 2:0.257702 3:0.862484 5:0.644335  
1.28 1:0.69183 2:0.18871 3:0.744495 5:0.605012  
1.28 1:0.716018 2:0.473261 3:0.688409 5:0.870002  
1.28 1:0.340025 2:0.315581 3:0.597009 5:0.693447  
1.28 1:0.678726 2:0.192232 3:0.273785 5:0.775654  
1.28 1:0.291231 2:0.295224 3:0.616535 5:0.575591

1.28 1:0.257284 2:0.178477 3:0.761529 5:0.760326  
1.28 1:0.439286 2:0.329555 3:0.727046 5:0.808806  
1.28 1:0.485989 2:0.335167 3:0.749481 5:0.767129  
1.28 1:0.288652 2:0.115977 3:0.673868 5:0.498378  
1.28 1:0.252405 2:0.341879 3:0.656419 4:0.181818  
1.28 1:0.660323 2:0.195092 3:0.560864 5:0.751887  
1.28 1:0.495678 2:0.120489 3:0.657665 5:0.853899  
1.28 1:0.255402 2:0.265075 3:0.660573 5:0.713051  
1.28 1:0.277011 2:0.138864 3:0.712505 5:0.732512  
1.28 1:0.509062 2:0.203675 3:0.645617 5:0.832458  
1.28 1:0.454134 2:0.305018 3:0.784794 5:0.777979  
1.28 1:0.955388 2:0.112456 3:0.755297 5:0.689974  
1.28 1:0.746062 2:0.18827 3:0.746988 5:0.645885  
1.28 1:0.257981 2:0.278389 3:0.605318 5:0.631046  
1.28 1:0.27729 2:0.247139 3:0.686747 5:0.782198  
1.28 1:0.257005 2:0.180568 3:0.686747 5:0.734149  
1.28 1:0.258609 2:0.232064 3:0.483174 4:0.0909091 5:0.731651  
1.28 1:0.27736 2:0.220511 3:0.691317 4:0.272727 5:0.627659  
1.28 1:0.309355 2:0.18816 3:0.764022 5:0.693332  
1.28 1:0.629792 2:0.229203 3:0.564188 5:0.761733  
1.28 1:0.346787 2:0.229864 3:0.752389 5:0.839174  
1.28 1:0.283563 2:0.205106 3:0.736602 5:0.796091  
1.28 1:0.619894 2:0.261994 3:0.701288 5:0.793938  
1.28 1:0.776941 2:0.0927597 3:0.714582 5:0.727059  
1.28 1:0.261745 2:0.25143 3:0.570004 5:0.67014  
1.28 1:0.256169 2:0.256272 3:0.614458 5:0.752691  
1.28 1:0.282169 2:0.242187 3:0.734109 5:0.78659  
1.28 1:0.27736 2:0.163512 3:0.779809 5:0.644077  
1.28 1:0.310958 2:0.176056 3:0.744911 5:0.760584  
1.28 1:0.272689 2:0.201585 3:0.747819 4:0.0909091 5:0.764632  
1.28 1:0.51903 2:0.173085 3:0.528459 5:0.645369  
1.28 1:0.497072 2:0.257262 3:0.5887 5:0.74873  
1.28 1:0.40513 2:0.325814 3:0.650187 5:0.664629  
1.28 1:0.41712 2:0.173415 3:0.713336 5:0.73788  
1.28 1:0.518542 2:0.271127 3:0.695056 5:0.816384

1.28 1:0.512547 2:0.326144 3:0.706689 5:0.799047  
1.28 1:0.344207 2:0.164723 3:0.751973 5:0.660782  
1.28 1:0.26551 2:0.290273 3:0.668882 5:0.670197  
1.28 1:0.664785 2:0.151629 3:0.653926 5:0.69913  
1.28 1:0.294089 2:0.21765 3:0.713336 4:0.272727 5:0.584603  
1.28 1:0.580998 2:0.164613 3:0.669713 5:0.71862  
1.28 1:0.4052 2:0.421765 3:0.713336 5:0.784121  
1.28 1:0.31981 2:0.128301 3:0.75779 5:0.730561  
1.28 1:0.303848 2:0.299846 3:0.643124 5:0.705359  
1.28 1:0.267531 2:0.257923 3:0.738263 4:0.0909091 5:0.658199  
1.28 1:0.721734 2:0.2182 3:0.691317 4:0.0909091 5:0.624473  
1.28 1:0.287885 2:0.100682 3:0.690486 5:0.609949  
1.28 1:0.368256 2:0.246589 3:0.690071 5:0.660495  
1.134343608909426 1:0.391329 2:0.247469 3:0.705858  
1.28 1:0.545518 2:0.21941 3:0.477773 5:0.777347  
1.28 1:0.488638 2:0.273107 3:0.65268 5:0.716266  
1.28 1:0.271713 2:0.284001 3:0.759452 5:0.690921  
1.28 1:0.510595 2:0.120158 3:0.560864 5:0.75648  
1.28 1:0.847972 2:0.117408 3:0.658496 5:0.65751  
1.28 1:0.25819 2:0.138534 3:0.733278 5:0.692328  
1.28 1:0.301826 2:0.137654 3:0.757374 4:0.0909091 5:0.646345  
1.28 1:0.33891 2:0.115537 3:0.713336 5:0.79434  
1.28 1:0.737279 2:0.346171 3:0.753635 5:0.899653  
1.28 1:0.289488 2:0.308759 3:0.597424 5:0.721691  
1.28 1:0.534226 2:0.296545 3:0.630661 5:0.735498  
1.28 1:0.580998 2:0.296435 3:0.771084 5:0.827004  
1.28 1:0.754705 2:0.372249 3:0.754882 5:0.848532  
1.28 1:0.498466 2:0.134243 3:0.636061 5:0.771865  
1.28 2:0.168574 3:0.717075 5:0.744137  
1.28 1:0.287676 2:0.173526 3:0.69381 4:0.181818 5:0.615661  
1.28 1:0.470863 2:0.194102 3:0.454508 5:0.756738  
1.28 1:0.413007 2:0.270577 3:0.436228 5:0.754901  
1.28 1:0.306078 2:0.28059 3:0.71666 5:0.651569  
1.28 1:0.43594 2:0.242408 3:0.59784 5:0.837625  
1.28 1:0.27736 2:0.210937 3:0.802659 5:0.698929

1.28 1:0.604977 2:0.103543 3:0.759036 5:0.426275  
1.28 1:0.356754 2:0.327025 3:0.669713  
1.28 1:0.278754 2:0.299626 3:0.633984 5:0.631648  
1.28 1:0.510386 2:0.213688 3:0.877441  
1.28 1:0.309215 2:0.323063 3:0.564188 5:0.707799  
1.28 1:0.252265 2:0.326474 3:0.475696 5:0.738454  
1.28 1:0.81751 2:0.164393 3:0.418363 5:0.788255  
1.28 1:0.391468 2:0.335057 3:0.672622 5:0.675192  
1.069210709416265 1:0.510735 2:0.233275 3:0.578729 5:0.652344  
1.28 1:0.484595 2:0.192672 3:0.707104 4:0.0909091  
1.28 1:0.422766 2:0.240647 3:0.728708 5:0.749361  
1.28 1:0.684511 2:0.303257 3:0.755297 5:0.884296  
1.28 1:0.571588 2:0.829115 3:0.746988 5:0.861649  
1.28 1:0.743273 2:0.388644 3:0.610719 5:0.87824  
1.28 1:0.62094 2:0.422535 3:0.613211 5:0.860042  
1.28 1:0.806985 2:0.25132 3:0.777732 5:0.87336  
1.28 1:0.729053 2:0.329886 3:0.81263 5:0.900399  
1.28 1:0.710512 2:0.677817 3:0.740756 5:0.847585  
1.28 1:0.739997 2:0.425286 3:0.802659 5:0.851  
1.28 1:0.773944 2:0.224692 3:0.825509 5:0.857344  
1.28 1:0.283912 2:0.178037 3:0.681762 5:0.797239  
1.28 1:0.288303 2:0.0412632 3:0.684254 5:0.663222  
1.28 1:0.283982 2:0.105964 3:0.584545 5:0.771836  
1.28 1:0.260212 2:0.200154 3:0.75779 5:0.729699  
1.28 1:0.276802 2:0.0958407 3:0.443706 5:0.716869  
1.28 1:0.665551 2:0.411862 3:0.759036 5:0.879819  
1.28 1:0.28426 2:0.207526 3:0.750727 5:0.619449  
0.0837543046430924 1:0.230726 2:0.150418 3:0.754466 4:0.818182 5:0.670943  
1.28 1:0.683745 2:0.484375 3:0.714582 5:0.797267  
1.28 1:0.423463 2:0.3125 3:0.523473 5:0.723098  
1.28 1:0.625122 2:0.208407 3:0.729539 5:0.843136  
1.28 1:0.463335 2:0.34485 3:0.723307 5:0.751084  
1.28 1:0.405618 2:0.247799 3:0.598255 5:0.680301  
1.28 1:0.293671 2:0.110145 3:0.786872 5:0.628032  
1.28 1:0.686812 2:0.144586 3:0.42501 4:0.0909091 5:0.783662

1.28 1:0.687648 2:0.389305 3:0.74408 5:0.797382  
1.28 1:0.662972 2:0.279049 3:0.589946 5:0.646546  
1.28 1:0.36261 2:0.211488 3:0.695887 5:0.647033  
1.28 1:0.793392 2:0.247579 3:0.610719 5:0.872212  
1.28 1:0.331382 2:0.271897 3:0.742002 5:0.738511  
1.28 1:0.33187 2:0.386114 3:0.73951 5:0.777204  
1.28 1:0.30817 2:0.246369 3:0.731201 5:0.734321  
1.28 1:0.351666 2:0.299186 3:0.705027 5:0.703235  
1.28 1:0.387634 2:0.150198 3:0.745742 5:0.773013  
1.28 1:0.636554 2:0.212258 3:0.698795 5:0.783289  
1.28 1:0.629374 2:0.119498 3:0.596178 5:0.793565  
1.28 1:0.25129 2:0.241857 3:0.745326 4:0.181818 5:0.679095  
1.28 1:0.819253 2:0.414613 3:0.791442 5:0.791355  
1.28 1:0.343162 2:0.356404 3:0.747403 4:0.181818  
1.28 1:0.353687 2:0.1875 3:0.737017 5:0.645196  
1.28 1:0.318625 2:0.178807 3:0.713752 5:0.633916  
1.28 1:0.277638 2:0.115537 3:0.727877 5:0.681908  
1.28 1:0.521539 2:0.227003 3:0.677192 5:0.847298  
1.28 1:0.414192 2:0.463908 3:0.658496 5:0.742386  
1.28 1:0.379269 2:0.203675 3:0.602825 5:0.737794  
1.28 1:0.381849 2:0.133033 3:0.682177 5:0.71641  
1.28 1:0.248292 2:0.137874 3:0.749481 5:0.691438  
1.28 1:0.380733 2:0.144256 3:0.764853 5:0.781481  
1.28 1:0.310609 2:0.0985915 3:0.73037 5:0.785442  
1.28 1:0.241391 2:0.441571 3:0.752804 5:0.611929  
1.28 1:0.272968 2:0.179467 3:0.705442 5:0.65309  
1.28 1:0.262094 2:0.190581 3:0.439136 5:0.768478  
1.28 1:0.271504 2:0.177927 3:0.728292 5:0.623037  
1.28 1:0.263 2:0.228983 3:0.770669 4:0.181818 5:0.648268  
1.28 1:0.25819 2:0.12478 3:0.669713 5:0.797928  
1.28 1:0.719155 2:0.144806 3:0.70295 5:0.706392  
1.28 1:0.945281 2:0.478543 3:0.740341 5:0.878412  
1.28 1:0.474418 2:0.222381 3:0.717906 5:0.802004  
1.28 1:0.984525 2:0.299516 3:0.897798 5:0.857746  
1.28 1:0.313119 2:0.21974 3:0.751973 5:0.799506

1.28 1:0.404782 2:0.145246 3:0.700042 5:0.707339  
1.28 1:0.456991 2:0.246479 3:0.615704 5:0.797612  
1.28 1:0.283075 2:0.2818 3:0.69838 5:0.567094  
1.28 1:0.305033 2:0.271677 3:0.732862 5:0.694767  
1.28 1:0.775826 2:0.31129 3:0.691317 5:0.760929  
1.28 1:0.342813 2:0.132923 3:0.723722 5:0.654295  
1.28 1:0.27715 2:0.146457 3:0.722061 5:0.66305  
1.28 1:0.310818 2:0.175506 3:0.722061 5:0.674015  
1.28 1:0.297435 2:0.159001 3:0.741587 5:0.640805  
1.28 1:0.289976 2:0.1568 3:0.755297 5:0.594162  
1.28 1:0.25826 2:0.245929 3:0.75322 5:0.78969  
1.28 1:0.261815 2:0.266725 3:0.682177 5:0.550676  
1.28 1:0.290882 2:0.184859 3:0.682177 5:0.716381  
1.28 1:0.261606 2:0.179798 3:0.75322 5:0.596372  
1.28 1:0.363237 2:0.090669 3:0.621521 5:0.588507  
1.28 1:0.29151 2:0.190471 3:0.619859 5:0.575591  
1.28 1:0.499164 2:0.100462 3:0.624429 5:0.61833  
1.28 1:0.553325 2:0.303917 3:0.431658 5:0.774764  
1.28 1:0.266485 2:0.140625 3:0.877856 5:0.710124  
1.28 1:0.249826 2:0.506602 3:0.877856 5:0.69405  
1.28 1:0.27478 2:0.299406 3:0.593685 4:0.0909091 5:0.601452  
1.28 1:0.809633 2:0.423085 3:0.743249 5:0.899222  
1.28 1:0.761745 2:0.172315 3:0.754466 5:0.877924  
1.28 1:0.747874 2:0.337368 3:0.867885 5:0.908005  
1.28 1:0.27722 2:0.459947 3:0.75322 5:0.616005  
1.28 1:0.26551 2:0.276849 3:0.659327 5:0.616005  
1.28 1:0.387425 2:0.205766 3:0.691317 5:0.695715  
1.28 1:0.28921 2:0.179908 3:0.554217 5:0.822297  
1.28 1:0.315558 2:0.174186 3:0.805567 5:0.617899  
1.28 1:0.515266 2:0.28257 3:0.857499 4:0.0909091  
1.28 1:0.367768 2:0.348151 3:0.6801 5:0.73788  
1.28 1:0.406176 2:0.398217 3:0.637308 5:0.685037  
1.28 1:0.518472 2:0.0752641 3:0.809306  
1.28 1:0.300153 2:0.244938 3:0.752804 5:0.715118  
1.28 1:0.337725 2:0.132042 3:0.732862 5:0.684004

1.28 1:0.410986 2:0.185079 3:0.741172 4:0.181818  
1.28 1:0.323226 2:0.338358 3:0.647694 4:0.0909091  
1.28 1:0.310888 2:0.210277 3:0.683839 5:0.767732  
1.28 1:0.336679 2:0.190251 3:0.754466 5:0.751715  
1.28 1:0.29862 2:0.290603 3:0.640631 4:0.181818 5:0.564942  
1.28 1:0.793322 2:0.252751 3:0.759867 5:0.722868  
1.28 1:0.261257 2:0.207196 3:0.79892 4:0.272727 5:0.649502  
1.28 1:0.263837 2:0.142496 3:0.606149 4:0.0909091 5:0.585981  
1.28 1:0.309285 2:0.172425 3:0.606564 5:0.700049  
1.28 1:0.299247 2:0.148217 3:0.783133 5:0.596056  
1.28 1:0.773177 2:0.307989 3:0.632738 5:0.802692  
1.28 1:0.604907 2:0.495709 3:0.760698 5:0.789776  
1.28 1:0.367698 2:0.252311 3:0.630245 5:0.768047  
1.28 1:0.559738 2:0.422975 3:0.52472 5:0.789776  
1.28 1:0.681026 2:0.585167 3:0.684254 5:0.928327  
1.28 1:0.849296 2:0.265295 3:0.70752 4:0.0909091 5:0.931686  
1.28 1:0.854733 2:0.241747 3:0.688824 5:0.909412  
1.28 1:0.69901 2:0.722711 3:0.678438 5:0.90149  
1.28 1:0.859752 2:0.441351 3:0.643955 5:0.91455  
1.28 1:0.839746 2:0.283561 3:0.691732 5:0.879646  
1.28 1:0.349366 2:0.146787 3:0.667636 5:0.569505  
1.28 1:0.26077 2:0.238996 3:0.702119 5:0.722552  
1.28 1:0.260282 2:0.248349 3:0.497715 4:0.181818 5:0.634174  
1.28 1:0.323714 2:0.225792 3:0.613211 5:0.780993  
1.28 1:0.261745 2:0.199274 3:0.7258 5:0.628807  
1.28 1:0.357312 2:0.253301 3:0.705027  
1.28 1:0.349575 2:0.177927 3:0.850021 5:0.732627  
1.28 1:0.311027 2:0.291373 3:0.699211 5:0.830219  
1.28 1:0.319044 2:0.228323 3:0.658496  
1.28 1:0.330963 2:0.106294 3:0.76236 5:0.760326  
1.28 1:0.444654 2:0.206866 3:0.618197 5:0.85344  
1.28 1:0.89802 2:0.418244 3:0.751973 5:0.735584  
1.28 1:0.353339 2:0.31261 3:0.727877 5:0.783002  
1.28 1:0.752475 2:0.270357 3:0.719152 5:0.71331  
1.28 1:0.651122 2:0.161312 3:0.661404 5:0.815006



1.28 1:0.645337 2:0.412192 3:0.605733 5:0.777261  
1.28 1:0.819601 2:0.131272 3:0.764022 5:0.585637  
1.28 1:0.840443 2:0.238996 3:0.523058 5:0.778266  
1.28 1:0.287955 2:0.328345 3:0.692979 5:0.672407  
1.28 1:0.263349 2:0.195312 3:0.605733 5:0.514452  
1.28 1:0.654468 2:0.129291 3:0.62983 5:0.70223  
1.28 1:0.465147 2:0.339018 3:0.798504 5:0.81093  
1.28 1:0.536108 2:0.298636 3:0.644786 5:0.773357  
1.28 1:0.699498 2:0.385893 3:0.681762 5:0.75493  
1.28 1:0.476718 2:0.397447 3:0.740341 5:0.753782  
1.28 1:0.704587 2:0.316461 3:0.378064 5:0.692557  
1.28 1:0.371184 2:0.298526 3:0.418363 4:0.272727 5:0.751284  
1.28 1:0.246689 2:0.15625 3:0.813876 5:0.730187  
1.28 1:0.483201 2:0.24934 3:0.759452 5:0.80585  
1.28 1:0.500209 2:0.34452 3:0.911924 4:0.181818  
1.28 1:0.436428 2:0.432658 3:0.555048 5:0.772726  
1.28 1:0.771156 2:0.292914 3:0.768176 5:0.805103  
1.28 1:0.271574 2:0.151078 3:0.70295 5:0.555728  
1.28 1:0.497003 2:0.160541 3:0.52098 5:0.71064  
1.28 1:0.285236 2:0.166813 3:0.697549 4:0.181818 5:0.617842  
1.147708956251298 1:0.331382 2:0.230084 3:0.695056 4:0.181818  
1.28 1:0.355988 2:0.134903 3:0.697549  
1.28 1:0.266695 2:0.168464 3:0.599501 5:0.70002  
1.28 1:0.541266 2:0.240537 3:0.614458 5:0.727891  
1.28 1:0.69434 2:0.177157 3:0.690902 5:0.698269  
1.28 1:0.860309 2:0.392936 3:0.60241 5:0.73501  
1.28 1:0.381849 2:0.141505 3:0.62983 5:0.583742  
1.28 1:0.637808 2:0.18684 3:0.695472 5:0.764804  
1.28 1:0.266555 2:0.184089 3:0.683423 5:0.761044  
1.28 1:0.488917 2:0.0852773 3:0.635646 5:0.698958  
1.28 1:0.29862 2:0.240977 3:0.807229 4:0.181818 5:0.590545  
1.28 1:0.715182 2:0.180788 3:0.47445 5:0.699475  
1.28 1:0.355291 2:0.317782 3:0.738679 5:0.653635  
1.28 1:0.292207 2:0.153389 3:0.696302 5:0.667097  
1.28 1:0.280845 2:0.182328 3:0.721645 5:0.617785

1.28 1:0.345532 2:0.414943 3:0.703365 5:0.735469  
1.28 1:0.267322 2:0.178147 3:0.697549 5:0.619622  
1.28 1:0.434825 3:0.601579 5:0.763971  
1.28 1:0.409801 2:0.205216 3:0.702119 5:0.789317  
1.28 1:0.303708 2:0.229313 3:0.781471 5:0.611642  
1.28 1:0.271783 2:0.293244 3:0.40673 5:0.696518  
1.28 1:0.377387 2:0.337478 3:0.795596 5:0.775711  
1.28 1:0.264185 2:0.255942 3:0.682177 5:0.71064  
1.28 1:0.249129 2:0.234485 3:0.463232 5:0.679497  
1.28 1:0.307333 2:0.168684 3:0.660573 5:0.644393  
1.28 1:0.732887 2:0.267716 3:0.764022 5:0.77241  
1.28 1:0.264185 2:0.341329 3:0.741172 5:0.698499  
1.28 1:0.294437 2:0.165603 3:0.530951 5:0.615345  
1.28 1:0.60909 2:0.199934 3:0.659742 5:0.631878  
1.28 1:0.663948 2:0.136114 3:0.555879 5:0.730044  
1.28 1:0.584832 2:0.232284 3:0.632738 5:0.79632  
1.28 1:0.769483 2:0.37621 3:0.766099 5:0.781681  
1.28 1:0.654886 2:0.268156 3:0.66182 5:0.733  
1.28 1:0.775896 2:0.146347 3:0.67096 5:0.682138  
1.28 1:0.380664 2:0.283561 3:0.769423 4:0.0909091  
1.28 1:0.790673 2:0.420224 3:0.687162 5:0.779529  
1.28 1:0.445769 2:0.277069 3:0.418779 5:0.690778  
1.28 1:0.778057 2:0.455546 3:0.700457 5:0.748615  
1.28 1:0.268298 2:0.141615 3:0.717906 5:0.681219  
1.28 1:0.245434 2:0.166483 3:0.60698 5:0.713884  
1.28 1:0.297156 2:0.210607 3:0.752804 5:0.575332  
1.28 2:0.172975 3:0.791857 5:0.807888  
1.28 1:0.385055 2:0.294014 3:0.791857 4:0.0909091 5:0.78903  
1.28 1:0.424648 2:0.118728 3:0.392605 5:0.576136  
1.28 1:0.377806 2:0.319982 3:0.731201 5:0.70223  
1.28 1:0.340374 2:0.457086 3:0.729539  
1.28 1:0.45267 2:0.318002 3:0.718322 5:0.780505  
1.28 1:0.621567 2:0.165603 3:0.843373  
1.28 1:0.546912 2:0.147227 3:0.468218 5:0.819685  
1.28 1:0.292834 2:0.324494 3:0.674283 4:0.181818

1.28 1:0.548376 2:0.153169 3:0.80349  
1.28 1:0.332427 2:0.234375 3:0.426257 5:0.736244  
1.28 1:0.400112 2:0.242738 3:0.701288 4:0.0909091 5:0.734378  
1.28 1:0.323644 2:0.295114 3:0.683423  
1.28 1:0.405758 2:0.265405 3:0.658496 4:0.0909091  
1.28 1:0.279799 2:0.443332 3:0.718322 5:0.631677  
1.28 1:0.48348 2:0.272227 3:0.696302 4:0.181818  
1.28 1:0.342395 2:0.454665 3:0.683423  
1.28 1:0.522236 2:0.254291 3:0.664312 5:0.749017  
1.28 1:0.504043 2:0.0931998 3:0.654757 5:0.694968  
1.28 1:0.315419 2:0.204005 3:0.664312  
1.28 1:0.33417 2:0.262764 3:0.678438 5:0.75028  
1.28 1:0.79158 2:0.528829 3:0.73951 4:0.0909091 5:0.854847  
1.28 1:0.255332 2:0.175066 3:0.653511 5:0.612704  
1.28 1:0.769762 2:0.34353 3:0.718322 5:0.774477  
1.28 1:0.325875 2:0.387214 3:0.683423  
1.28 1:0.328105 2:0.303917 3:0.683423  
1.28 1:0.34114 2:0.150528 3:0.692979 5:0.663251  
1.28 1:0.415935 2:0.393926 3:0.646863 5:0.789604  
1.28 1:0.29632 2:0.439151 3:0.755297 5:0.645828  
0.6049038561673269 1:0.515614 2:0.324274 3:0.748234 4:0.363636  
1.28 1:0.782936 2:0.197293 3:0.614873 5:0.734349  
1.28 1:0.616478 2:0.251981 3:0.685916 4:0.0909091 5:0.893969  
1.28 1:0.318347 2:0.276188 3:0.811383 5:0.722122  
1.28 1:0.795274 2:0.134353 3:0.647279 5:0.74032  
1.28 1:0.264673 2:0.198063 3:0.711674 5:0.591665  
1.28 1:0.306915 2:0.162412 3:0.713336 5:0.682253  
1.28 1:0.787537 2:0.270357 3:0.842543 5:0.815839  
1.28 1:0.402272 2:0.329225 3:0.552971 4:0.0909091 5:0.625592  
1.28 1:0.531856 2:0.170004 3:0.803074  
1.28 1:0.276523 2:0.184529 3:0.739094 5:0.653406  
1.28 1:0.28203 2:0.172095 3:0.737017 5:0.711645  
1.28 1:0.299247 2:0.107064 3:0.745326 5:0.663308  
1.28 1:0.307542 2:0.238886 3:0.744911 5:0.647234  
1.28 1:0.346787 2:0.178477 3:0.683008 5:0.759781

1.28 1:0.276453 2:0.264085 3:0.764022 5:0.677  
1.28 1:0.567684 2:0.535321 3:0.5887 5:0.907776  
1.28 1:0.674613 2:0.184749 3:0.697964 5:0.62453  
1.28 1:0.558971 2:0.114657 3:0.421271 5:0.791211  
1.28 1:0.660393 2:0.22029 3:0.427503 4:0.0909091 5:0.711157  
1.28 1:0.657675 2:0.284331 3:0.522227 5:0.785212  
1.28 1:0.583438 2:0.309859 3:0.52098 5:0.751629  
1.28 1:0.288164 2:0.146787 3:0.643124 5:0.565171  
1.28 1:0.254845 2:0.158231 3:0.759036 5:0.559976  
1.28 1:0.373275 2:0.265185 3:0.683423  
1.28 1:0.379967 2:0.368288 3:0.819277 5:0.721261  
1.28 1:0.320229 2:0.357614 3:0.643955 5:0.632739  
1.28 1:0.291858 2:0.247139 3:0.797258 5:0.651827  
1.28 1:0.273386 2:0.268376 3:0.735355 5:0.85921  
1.28 1:0.318137 2:0.107724 3:0.661404  
1.28 1:0.347344 2:0.168794 3:0.642709 5:0.61124  
1.28 1:0.277778 2:0.170335 3:0.654757 5:0.762823  
1.28 1:0.296041 2:0.146897 3:0.645617 5:0.719797  
1.28 1:0.288303 2:0.0961708 3:0.639385  
1.28 1:0.267043 2:0.227993 3:0.639385 5:0.679325  
1.28 1:0.292137 2:0.137544 3:0.645617  
1.28 1:0.317719 2:0.165163 3:0.703781 5:0.715549  
1.28 1:0.56392 2:0.261994 3:0.597424 5:0.724935  
1.28 1:0.254217 2:0.265515 3:0.781055 5:0.569276  
1.28 1:0.281402 2:0.0826364 3:0.690902 5:0.666494  
1.28 1:0.643943 2:0.333627 3:0.709597 5:0.849278  
1.28 1:0.361007 2:0.159771 3:0.696302 5:0.695858  
1.28 1:0.573121 2:0.351342 3:0.749065 5:0.896467  
1.28 1:0.359334 2:0.142496 3:0.764022 5:0.674043  
1.28 1:0.276732 2:0.191791 3:0.736602 5:0.690663  
1.28 1:0.27255 2:0.204665 3:0.694641 4:0.181818 5:0.725939  
1.28 1:0.3318 2:0.232174 3:0.65268 5:0.748012  
1.28 1:0.268507 2:0.096941 3:0.621105 5:0.702517  
1.28 1:0.573958 2:0.200154 3:0.733693 5:0.87491  
1.28 1:0.660114 2:0.205656 3:0.702119 5:0.66704

1.28 1:0.301617 2:0.211598 3:0.585791 5:0.592583  
1.28 1:0.32232 2:0.154159 3:0.739925 5:0.637332  
1.28 1:0.849505 2:0.135563 3:0.754051 5:0.781509  
1.28 1:0.288652 2:0.175616 3:0.729954 4:0.181818 5:0.656276  
1.28 1:0.322111 2:0.233715 3:0.796427 5:0.67258  
1.28 1:0.347832 2:0.141065 3:0.672622 5:0.729412  
1.28 1:0.681653 2:0.174296 3:0.423764 5:0.685066  
1.28 1:0.339328 2:0.177707 3:0.74865 5:0.639169  
1.28 1:0.575631 2:0.18893 3:0.630661 5:0.782801  
1.28 1:0.354175 2:0.270136 3:0.768592 5:0.750739  
1.28 1:0.589014 2:0.59529 3:0.611965 5:0.853899  
1.28 1:0.646103 2:0.266285 3:0.607811 5:0.801975  
1.28 1:0.675728 2:0.234705 3:0.633153 5:0.594506  
1.28 1:0.707654 2:0.360475 3:0.729954 5:0.820201  
1.28 1:0.352572 2:0.12577 3:0.683839 5:0.658056  
1.28 1:0.419002 2:0.28125 3:0.764022 4:0.0909091  
1.28 1:0.661718 2:0.235365 3:0.610719 5:0.717013  
1.28 1:0.480413 2:0.371589 3:0.663897 5:0.723299  
1.28 1:0.812422 2:0.326474 3:0.664312 5:0.529177  
1.28 1:0.672383 2:0.211378 3:0.681762 5:0.789345  
1.28 1:0.286073 2:0.213468 3:0.81263 5:0.68607  
1.28 1:0.540151 2:0.241417 3:0.603656 5:0.761187  
1.28 1:0.756587 2:0.711048 3:0.720399 5:0.894716  
1.28 1:0.793671 2:0.627531 3:0.631076 5:0.880307  
1.28 1:0.877318 2:0.370268 3:0.847528 5:0.8198  
1.28 1:0.626028 2:0.12533 3:0.687993 5:0.849393  
1.28 1:0.323296 2:0.180238 3:0.60698 5:0.718046  
1.28 1:0.275059 2:0.112016 3:0.605318 5:0.753609  
1.28 1:0.299108 2:0.385893 3:0.773993 4:0.0909091  
1.28 1:0.482086 2:0.196083 3:0.817615  
1.28 1:0.283354 2:0.272997 3:0.478189 5:0.718907  
1.28 1:0.644988 2:0.364987 3:0.706689 5:0.781222  
1.28 1:0.797435 2:0.270357 3:0.733693 5:0.708315  
1.28 1:0.500349 2:0.348151 3:0.725384 5:0.771693  
1.28 1:0.506483 2:0.214679 3:0.651433 5:0.747897

1.28 1:0.530392 2:0.297095 3:0.577482 5:0.818996  
1.28 1:0.585738 2:0.56195 3:0.683839 5:0.798875  
1.28 1:0.26077 2:0.262764 3:0.651433 4:0.181818 5:0.574844  
1.28 1:0.273526 2:0.142055 3:0.773993 5:0.594076  
1.28 1:0.319462 2:0.284991 3:0.740756 5:0.699475  
1.28 1:0.330127 2:0.352223 3:0.78521 5:0.683745  
1.28 1:0.297992 2:0.211928 3:0.532198 5:0.683745  
1.28 1:0.292277 2:0.282901 3:0.686332 5:0.730675  
1.28 1:0.26551 2:0.34518 3:0.847528 5:0.655243  
1.28 1:0.304266 2:0.102003 3:0.683423  
1.28 1:0.337655 2:0.230744 3:0.744495 4:0.0909091  
1.28 1:0.505646 2:0.300836 3:0.724969 5:0.806567  
1.28 1:0.385822 2:0.226452 3:0.621105 5:0.798301  
1.28 1:0.633556 2:0.403389 3:0.670544 5:0.818422  
1.28 1:0.608602 2:0.416373 3:0.758205 5:0.80849  
1.28 1:0.709048 2:0.335717 3:0.754466 5:0.834926  
1.28 1:0.537362 2:0.598482 3:0.878687 5:0.908867  
1.28 1:0.753032 2:0.396677 3:0.816369 5:0.868969  
1.28 1:0.54977 2:0.319322 3:0.421271 5:0.742473  
1.28 1:0.548446 2:0.345621 3:0.670544 5:0.779385  
1.28 1:0.349087 2:0.207416 3:0.420025 5:0.640948  
1.28 1:0.321553 2:0.21798 3:0.606564 5:0.746548  
1.28 1:0.50481 2:0.230854 3:0.665143 4:0.0909091  
1.28 1:0.29611 2:0.247249 3:0.832572 5:0.779414  
1.28 1:0.664227 2:0.169124 3:0.478189 5:0.631706  
1.28 1:0.675868 2:0.18838 3:0.72123 5:0.598926  
1.28 1:0.36735 2:0.211048 3:0.653511 4:0.181818 5:0.74695  
1.28 1:0.287258 2:0.163842 3:0.731201 5:0.711358  
1.28 1:0.25589 2:0.111466 3:0.639385 5:0.774391  
1.28 1:0.866932 2:0.247689 3:0.786041 5:0.649875  
1.28 1:0.391468 2:0.277729 3:0.713336 5:0.772611  
1.28 1:0.273665 2:0.259353 3:0.637723 5:0.652631  
1.28 1:0.302593 2:0.460937 3:0.678853 5:0.652631  
1.28 1:0.280008 2:0.226562 3:0.660573 5:0.643761  
1.28 1:0.346717 2:0.204776 3:0.678853

1.28 1:0.294089 2:0.234595 3:0.717906 5:0.727174  
1.28 1:0.352502 2:0.18893 3:0.717906 5:0.745113  
1.28 1:0.598494 2:0.296435 3:0.809306 5:0.890898  
1.28 1:0.647428 2:0.180458 3:0.726215 5:0.822297  
1.28 1:0.256169 2:0.122799 3:0.542584 5:0.583915  
1.28 1:0.325387 2:0.284991 3:0.720399 5:0.684549  
1.28 1:0.30092 2:0.297645 3:0.704196 5:0.641408  
1.28 1:0.803151 2:0.145687 3:0.754882 5:0.644307  
1.28 1:0.981179 2:0.191901 3:0.749481 5:0.53067  
1.28 1:0.508504 2:0.200814 3:0.807229  
1.28 1:0.560505 2:0.270797 3:0.820939 4:0.181818  
1.28 1:0.446466 2:0.183539 3:0.668467 5:0.696949  
1.28 1:0.297365 2:0.253191 3:0.415039 5:0.672235  
1.28 1:0.336261 2:0.230744 3:0.631076 4:0.0909091  
1.28 1:0.270459 2:0.199934 3:0.55214 5:0.746979  
1.28 1:0.269134 2:0.25 3:0.713336 4:0.272727 5:0.747697  
1.28 1:0.281751 2:0.264635 3:0.774823 5:0.770085  
1.28 1:0.642339 2:0.197403 3:0.600332 5:0.828899  
1.28 1:0.603025 2:0.331096 3:0.798504 4:0.0909091  
1.28 1:0.726823 2:0.288402 3:0.752389 5:0.769626  
1.28 1:0.272968 2:0.234815 3:0.782717 4:0.181818 5:0.493298  
1.28 1:0.283424 2:0.364547 3:0.755713 4:0.181818 5:0.717587  
1.28 1:0.641433 2:0.265075 3:0.475696 5:0.693303  
1.28 1:0.766625 2:0.144916 3:0.664312 4:0.0909091 5:0.810414  
1.28 1:0.324481 2:0.270797 3:0.728292 5:0.652602  
1.28 1:0.827896 2:0.175396 3:0.708766 5:0.729441  
1.28 1:0.699707 2:0.288402 3:0.639801 5:0.652143  
1.28 1:0.49519 2:0.397007 3:0.761944 5:0.749505  
1.28 1:0.733654 2:0.34441 3:0.668882 5:0.787393  
1.28 1:0.326432 2:0.137214 3:0.6801 5:0.675909  
1.28 1:0.298132 2:0.149538 3:0.768592 5:0.783719  
1.28 1:0.432385 2:0.230414 3:0.589531 5:0.760383  
1.28 1:0.25366 2:0.168354 3:0.592023 5:0.778294  
1.28 1:0.277847 2:0.293024 3:0.588284 5:0.817819  
1.28 1:0.368604 2:0.320863 3:0.593685 5:0.690605

1.28 1:0.517705 2:0.108825 3:0.643124 5:0.736301  
1.28 1:0.438101 2:0.165273 3:0.718737 4:0.0909091  
1.28 1:0.272968 2:0.272447 3:0.738679 4:0.181818 5:0.699475  
1.28 1:0.353618 2:0.227993 3:0.70295  
1.28 1:0.627771 2:0.238556 3:0.560864 5:0.748644  
1.28 1:0.474906 2:0.225022 3:0.663897 5:0.725825  
1.28 1:0.307403 2:0.301056 3:0.733693 4:0.181818 5:0.66061  
1.28 1:0.500558 2:0.292584 3:0.554217 5:0.836333  
1.28 1:0.703262 2:0.22007 3:0.683423 5:0.757944  
1.28 1:0.653213 2:0.330546 3:0.596178 5:0.784265  
1.28 1:0.636693 2:0.270136 3:0.560449 5:0.678579  
1.28 1:0.623728 2:0.232504 3:0.695056 5:0.816614  
1.28 1:0.314025 2:0.129181 3:0.658912  
1.28 1:0.801757 2:0.137104 3:0.741172 5:0.645283  
1.28 1:0.797923 2:0.283011 3:0.723307 5:0.660782  
1.28 1:0.353199 2:0.141505 3:0.619443 5:0.680444  
1.28 1:0.642548 2:0.297865 3:0.728708 5:0.800109  
1.28 1:0.294228 2:0.158891 3:0.72123 5:0.620799  
1.28 1:0.390492 2:0.278499 3:0.731201  
1.28 1:0.282587 2:0.305678 3:0.687993 5:0.6367  
1.28 1:0.343232 2:0.259463 3:0.736186 4:0.181818 5:0.800855  
1.28 1:0.288234 2:0.131162 3:0.734524 5:0.677201  
1.28 1:0.74634 2:0.176276 3:0.744495 5:0.721347  
1.28 1:0.525443 2:0.228103 3:0.717075 4:0.0909091  
1.28 1:0.487383 2:0.151629 3:0.653511 5:0.754528  
1.28 1:0.453088 2:0.264855 3:0.691317 4:0.0909091  
1.28 1:0.605953 2:0.118618 3:0.651433 5:0.642355  
1.28 1:0.688275 2:0.628081 3:0.755297 5:0.874221  
1.28 1:0.508644 2:0.252641 3:0.630245 5:0.742731  
1.28 1:0.583229 2:0.164723 3:0.630661 5:0.636356  
1.28 1:0.576467 2:0.337478 3:0.687993 5:0.783117  
1.28 1:0.433222 2:0.205876 3:0.611965 5:0.704469  
1.28 1:0.748223 2:0.133143 3:0.755297 5:0.778897  
1.28 1:0.657535 2:0.880722 3:0.688409 4:0.0909091 5:0.876862  
1.28 1:0.331312 2:0.163732 3:0.709597 5:0.757542



1.28 1:0.735048 2:0.228763 3:0.700872 5:0.785241  
1.28 1:0.519727 2:0.454335 3:0.709182 4:0.181818  
1.28 1:0.592081 2:0.207196 3:0.877441 4:0.0909091  
1.28 1:0.448766 2:0.127421 3:0.660158 5:0.651339  
1.28 1:0.546842 2:0.167254 3:0.631491 5:0.735899  
1.28 1:0.696013 2:0.135783 3:0.758205 5:0.726887  
1.28 1:0.683605 2:0.117408 3:0.748234 5:0.765952  
1.28 1:0.77736 2:0.114547 3:0.733693 5:0.850139  
1.28 1:0.529834 2:0.143266 3:0.614458 5:0.601682  
1.28 1:0.525791 2:0.328125 3:0.717906 5:0.810729  
1.28 1:0.517426 2:0.0970511 3:0.818446  
1.28 2:0.154159 3:0.73494 5:0.745171  
1.28 1:0.575422 2:0.206426 3:0.604071 5:0.662706  
1.28 1:0.670988 2:0.142606 3:0.737432 5:0.652143  
1.28 1:0.38854 2:0.368068 3:0.764022  
1.28 1:0.577164 2:0.140405 3:0.897798  
1.28 1:0.378433 2:0.263204 3:0.736602  
1.28 1:0.267531 2:0.168574 3:0.667221 5:0.666121  
1.28 1:0.271783 2:0.137544 3:0.595347 5:0.74563  
1.28 1:0.641503 2:0.193112 3:0.884919  
1.28 1:0.3058 2:0.118948 3:0.707935 5:0.620024  
1.28 1:0.458455 2:0.266285 3:0.700042 5:0.826803  
1.28 1:0.320507 2:0.18893 3:0.66182 4:0.0909091  
1.28 1:0.34372 2:0.335937 3:0.737432 4:0.181818 5:0.644335  
1.28 1:0.3318 2:0.148107 3:0.561695 5:0.540285  
1.28 1:0.423951 2:0.285761 3:0.730785 4:0.0909091  
1.28 1:0.627213 2:0.251761 3:0.778147 5:0.884583  
1.28 1:0.621428 2:0.235365 3:0.464894 5:0.666638  
1.28 1:0.562178 2:0.401849 3:0.683008 5:0.838428  
1.28 1:0.713579 2:0.214018 3:0.641047 5:0.841327  
1.28 1:0.397323 2:0.203675 3:0.637308 4:0.0909091  
1.28 1:0.319671 2:0.140515 3:0.649356 5:0.635523  
1.28 1:0.645546 2:0.253741 3:0.722892 5:0.80163  
1.28 1:0.868674 2:0.349692 3:0.727462 5:0.78458  
1.28 1:0.736791 2:0.268376 3:0.683839 5:0.844714

1.28 1:0.597518 2:0.168024 3:0.64354 5:0.664571  
1.28 1:0.642758 2:0.262654 3:0.915663 4:0.0909091  
1.28 1:0.368186 2:0.490207 3:0.702534  
1.28 1:0.346299 2:0.28268 3:0.724553 5:0.629467  
1.28 1:0.681584 2:0.194872 3:0.418779 5:0.79899  
1.28 1:0.325457 2:0.197513 3:0.683839  
1.28 1:0.444584 2:0.315141 3:0.672206 5:0.700766  
1.28 1:0.587272 2:0.0924296 3:0.601163 5:0.805247  
1.28 1:0.337516 2:0.0904489 3:0.648525 5:0.742042  
1.28 1:0.562596 2:0.236466 3:0.52098 5:0.722868  
1.28 1:0.376899 2:0.415603 3:0.717491  
1.28 1:0.731702 2:0.333407 3:0.724553 5:0.839261  
1.28 1:0.880106 2:0.212808 3:0.773162 5:0.688711  
1.28 1:0.707166 2:0.202355 3:0.697964 5:0.763742  
1.28 1:0.825108 2:0.196303 3:0.635646 5:0.895749  
1.28 1:0.647288 2:0.129621 3:0.729539 5:0.734378  
1.28 1:0.718807 2:0.261114 3:0.626091 5:0.902293  
1.28 1:0.583856 2:0.334287 3:0.587038 5:0.754069  
1.28 1:0.752335 2:0.171435 3:0.68467 5:0.677115  
1.28 1:0.554371 2:0.300836 3:0.676776 5:0.807572  
1.28 1:0.298829 2:0.115867 3:0.656834  
1.28 1:0.63509 2:0.418134 3:0.713752 5:0.835816  
1.28 1:0.737906 2:0.262324 3:0.717491 5:0.895433  
1.28 1:0.361982 2:0.203345 3:0.721645 5:0.74385  
1.28 1:0.459013 2:0.297645 3:0.686747 4:0.0909091  
1.28 1:0.276662 2:0.122249 3:0.639385 4:0.181818 5:0.601711  
1.28 1:0.249477 2:0.337808 3:0.56128 5:0.622923  
1.28 1:0.569218 2:0.119938 3:0.670544 5:0.742702  
1.28 1:0.292695 2:0.231294 3:0.593685 5:0.750222  
1.28 1:0.579186 2:0.199384 3:0.595762 5:0.76489  
1.28 1:0.683187 2:0.246589 3:0.70752 5:0.799191  
1.28 1:0.615293 2:0.214899 3:0.88118  
1.28 1:0.357591 2:0.229754 3:0.73951 4:0.0909091 5:0.675335  
1.28 1:0.298271 2:0.377861 3:0.729123 5:0.685094  
1.28 1:0.587132 2:0.279599 3:0.713336 5:0.891042

1.28 1:0.592221 2:0.238666 3:0.609888 5:0.734349  
1.28 1:0.694758 2:0.289503 3:0.605318 5:0.800626  
1.28 1:0.837237 2:0.338358 3:0.776901 5:0.783547  
1.28 1:0.73449 2:0.235585 3:0.73951 5:0.720945  
1.28 1:0.575003 2:0.256052 3:0.724969 5:0.846924  
1.28 1:0.530113 2:0.395797 3:0.69381 5:0.86983  
1.28 1:0.363795 2:0.363446 3:0.855006 5:0.727891  
1.28 1:0.673846 2:0.231074 3:0.643124 5:0.676627  
1.28 1:0.616827 2:0.352443 3:0.673868 5:0.79721  
1.28 2:0.238336 3:0.731616 5:0.79632  
1.28 1:0.624286 2:0.197513 3:0.482343 5:0.621717  
1.28 1:0.815349 2:0.47018 3:0.739094 5:0.749734  
1.28 1:0.676774 2:0.552597 3:0.777732 5:0.829846  
1.28 1:0.680747 2:0.262324 3:0.703781 5:0.814977  
1.28 1:0.569009 2:0.131822 3:0.637308 5:0.727862  
1.28 1:0.833124 2:0.330876 3:0.68467 5:0.758977  
1.28 1:0.423742 2:0.198834 3:0.472372 5:0.645742  
1.28 1:0.588805 2:0.424626 3:0.660989 5:0.825282  
1.28 1:0.435801 2:0.381382 3:0.680931 5:0.805448  
1.28 1:0.518124 2:0.216879 3:0.625675 5:0.688309  
1.28 1:0.780915 2:0.209177 3:0.647279 5:0.651712  
1.28 1:0.561968 2:0.149758 3:0.713336 4:0.0909091  
1.28 1:0.436707 2:0.383693 3:0.733693 5:0.705933  
1.28 1:0.257633 2:0.179798 3:0.612381 5:0.651167  
1.28 1:0.302732 2:0.300066 3:0.749065 4:0.0909091 5:0.685611  
1.28 1:0.629374 2:0.365867 3:0.76236 5:0.868567  
1.28 1:0.293252 2:0.158121 3:0.687578 5:0.653779  
1.28 1:0.662624 2:0.179247 3:0.73037 5:0.668331  
1.28 1:0.661369 2:0.169894 3:0.700872 5:0.638394  
1.28 1:0.381849 2:0.179027 3:0.777732 5:0.779959  
1.28 1:0.294647 2:0.153609 3:0.646032 5:0.641637  
1.28 1:0.771853 2:0.232945 3:0.791026 5:0.764861  
1.28 1:0.69657 2:0.195863 3:0.748234 5:0.675019  
1.28 1:0.75122 2:0.454776 3:0.855006 5:0.853899  
1.28 1:0.326223 2:0.127971 3:0.677607

1.28 1:0.736512 2:0.165493 3:0.738679 5:0.660409  
1.28 1:0.316604 2:0.189591 3:0.621105 5:0.685295  
1.28 1:0.27736 2:0.146897 3:0.642709 5:0.794139  
1.28 1:0.252684 2:0.195202 3:0.713336 5:0.611786  
1.28 1:0.364004 2:0.161752 3:0.767761 5:0.678177  
1.28 1:0.442005 2:0.299846 3:0.620274 5:0.821464  
1.28 1:0.392095 2:0.221501 3:0.734109 4:0.181818  
1.28 1:0.568312 2:0.12445 3:0.764437 4:0.0909091  
1.28 1:0.254914 2:0.289613 3:0.722892 5:0.748156  
1.28 1:0.612854 2:0.279379 3:0.905276  
1.28 1:0.335912 2:0.235805 3:0.752804 4:0.181818 5:0.693791  
1.28 1:0.43594 2:0.244498 3:0.703781 5:0.736301  
1.28 1:0.277987 2:0.214899 3:0.427503 5:0.709148  
1.28 1:0.507807 2:0.391835 3:0.576651 5:0.714056  
1.28 1:0.519099 2:0.185739 3:0.615704 5:0.673182  
1.28 1:0.451206 2:0.236796 3:0.605318 5:0.776199  
1.28 1:0.727311 2:0.264415 3:0.657665 5:0.635581  
1.28 1:0.377597 2:0.130942 3:0.729123 5:0.701656  
1.28 1:0.34128 2:0.175396 3:0.683423  
1.28 1:0.7584 2:0.233935 3:0.735355 5:0.830879  
1.28 1:0.393211 2:0.254181 3:0.737017 5:0.798042  
1.28 1:0.433222 2:0.18706 3:0.791442  
1.28 1:0.551025 2:0.357064 3:0.82177 4:0.0909091  
1.28 1:0.548864 2:0.338248 3:0.477358 5:0.836448  
1.28 1:0.320089 2:0.371039 3:0.823432 5:0.755877  
1.28 1:0.389586 2:0.31217 3:0.768592  
1.28 1:0.317231 2:0.331866 3:0.832156 5:0.720486  
1.28 1:0.782657 2:0.189811 3:0.459909 5:0.819312  
1.28 1:0.338282 2:0.229643 3:0.754051 5:0.704469  
1.28 1:0.308936 2:0.239217 3:0.733693 5:0.583915  
1.28 1:0.344626 2:0.221171 3:0.777316 5:0.711588  
1.28 1:0.436986 2:0.202685 3:0.669713 5:0.694538  
1.28 1:0.761397 2:0.332306 3:0.781471 5:0.894486  
1.28 1:0.583577 2:0.145136 3:0.400083 5:0.756824  
1.28 1:0.644361 2:0.457746 3:0.730785 5:0.819914

1.28 1:0.720689 2:0.305018 3:0.669713 5:0.929476  
1.28 1:0.656141 2:0.146127 3:0.729123 5:0.619622  
1.28 1:0.722292 2:0.205876 3:0.683839 5:0.687993  
1.28 1:0.650286 2:0.34364 3:0.684254 5:0.892907  
1.28 1:0.701241 2:0.153829 3:0.751558 5:0.816901  
1.28 1:0.748362 2:0.243838 3:0.717491 5:0.776285  
1.28 1:0.814582 2:0.353653 3:0.759452 5:0.774448  
1.28 1:0.727171 2:0.444102 3:0.807229 5:0.904331  
1.28 1:0.547609 2:0.15581 3:0.474865 5:0.688941  
1.28 1:0.762233 2:0.263864 3:0.751143 5:0.834869  
0.7111897210644849 1:0.722362 2:0.877971 3:0.809306 4:0.0909091 5:0.911507  
1.28 1:0.675519 2:0.53048 3:0.753635 5:0.853899  
1.28 1:0.553046 2:0.214018 3:0.660989 5:0.746807  
1.28 1:0.684999 2:0.766945 3:0.755297 5:0.884526  
1.28 1:0.560783 2:0.284551 3:0.743664 5:0.904044  
1.28 1:0.498885 2:0.18728 3:0.905276  
1.28 1:0.287537 2:0.102333 3:0.690902 5:0.617239  
1.28 1:0.274223 2:0.368068 3:0.755297 4:0.0909091 5:0.70335  
1.28 1:0.580719 2:0.478433 3:0.717491 5:0.781882  
1.28 1:0.392235 2:0.207196 3:0.67553 5:0.710439  
1.28 1:0.260142 2:0.360035 3:0.721645 5:0.735067  
1.28 1:0.30085 2:0.246369 3:0.750727 5:0.660007  
1.28 1:0.63502 2:0.141505 3:0.688824 5:0.838859  
1.28 1:0.567406 2:0.194872 3:0.623598 5:0.620999  
0.08106221320036654 1:0.396487 2:0.149208 3:0.62526 5:0.570539  
1.28 1:0.830615 2:0.34452 3:0.690071 5:0.63205  
1.28 1:0.476649 2:0.193662 3:0.606149 5:0.733976  
1.28 1:0.41224 2:0.225572 3:0.759867 5:0.000344442  
1.28 1:0.646382 2:0.293574 3:0.758205 5:0.868768  
1.28 1:0.505507 2:0.0851673 3:0.740341 4:0.0909091  
1.28 1:0.327478 2:0.236466 3:0.77607 5:0.731766  
1.28 1:0.41238 2:0.193882 3:0.38845 5:0.723758  
1.28 1:0.436637 2:0.135013 3:0.584961 5:0.703637  
1.28 1:0.281054 2:0.309529 3:0.518488 5:0.669709  
1.28 1:0.358915 2:0.182438 3:0.877025 5:0.764373

1.28 1:0.473651 2:0.211048 3:0.583714 5:0.766354  
1.28 1:0.84372 2:0.145026 3:0.809722 5:0.725911  
1.28 1:0.730935 2:0.309199 3:0.682177 5:0.736473  
1.28 1:0.376412 2:0.378301 3:0.763606  
1.28 1:0.381361 2:0.221501 3:0.682592 5:0.68208  
1.28 1:0.560505 2:0.227113 3:0.695887 5:0.783059  
1.28 1:0.467866 2:0.305348 3:0.792688 4:0.181818  
1.28 1:0.406803 2:0.334617 3:0.759452  
1.28 1:0.317719 2:0.137984 3:0.646032 5:0.624616  
1.28 1:0.613481 2:0.256822 3:0.65268 5:0.704469  
1.28 1:0.249617 2:0.274978 3:0.765268 5:0.694165  
1.28 1:0.287537 2:0.317562 3:0.710012 4:0.181818 5:0.688252  
1.28 1:0.65405 2:0.139635 3:0.712505 5:0.757255  
1.28 1:0.419629 2:0.115097 3:0.695887 5:0.694394  
1.28 1:0.561481 2:0.322403 3:0.610303 5:0.86297  
1.28 1:0.731284 2:0.443552 3:0.832572 5:0.890898  
1.28 1:0.641015 2:0.200374 3:0.595762 5:0.822039  
1.28 1:0.549003 2:0.106624 3:0.795596  
1.28 1:0.409522 2:0.301166 3:0.734109 4:0.181818 5:0.818479  
1.28 1:0.299177 2:0.232394 3:0.73951 5:0.702374  
1.28 1:0.511014 2:0.228103 3:0.730785 4:0.272727  
1.28 1:0.265091 2:0.18717 3:0.825509 4:0.181818 5:0.655157  
1.28 1:0.314513 2:0.127091 3:0.711259 5:0.539711  
1.28 1:0.407152 2:0.275858 3:0.713336 5:0.717041  
1.28 1:0.736721 2:0.18662 3:0.764022 5:0.703005  
1.28 1:0.360937 2:0.240647 3:0.704612 4:0.0909091  
1.28 1:0.388819 2:0.208517 3:0.685085 5:0.745687  
1.28 1:0.531298 2:0.381052 3:0.692148 4:0.0909091 5:0.783518  
1.28 1:0.418862 2:0.103433 3:0.790195 4:0.0909091  
1.28 1:0.458664 2:0.18717 3:0.605318 5:0.683142  
1.28 1:0.449115 2:0.209727 3:0.598671 5:0.78128  
1.28 1:0.505716 2:0.37445 3:0.653095 5:0.748759  
1.28 1:0.697895 2:0.261884 3:0.6344 5:0.715692  
1.28 1:0.239579 2:0.234375 3:0.721645 5:0.577054  
1.28 1:0.404364 2:0.425616 3:0.746157

1.28 1:0.313397 2:0.149208 3:0.686747 5:0.707397  
1.28 1:0.340095 2:0.137544 3:0.771084 5:0.745171  
1.28 1:0.496515 2:0.401959 3:0.664312 5:0.768765  
1.28 1:0.591663 2:0.213468 3:0.633153 5:0.725308  
1.28 1:0.569497 2:0.306118 3:0.686747 4:0.181818  
1.28 1:0.372438 2:0.294784 3:0.691317  
1.28 1:0.46675 2:0.158561 3:0.845866  
1.28 1:0.320717 2:0.50033 3:0.671375 4:0.0909091 5:0.818479  
1.28 1:0.375924 2:0.216659 3:0.688409 5:0.717501  
1.28 1:0.522306 2:0.178917 3:0.593685 5:0.694767  
1.28 1:0.4075 2:0.194212 3:0.676776 5:0.670082  
1.28 1:0.378015 2:0.466989 3:0.743664 4:0.0909091  
1.28 1:0.271853 2:0.239657 3:0.786872 5:0.75183  
1.28 1:0.48111 2:0.315581 3:0.682177 5:0.735986  
1.28 1:0.340443 2:0.353653 3:0.66639 4:0.181818 5:0.78237  
1.28 1:0.496096 2:0.348371 3:0.74408 5:0.792675  
1.28 1:0.697477 2:0.697293 3:0.743664 5:0.779672  
1.28 1:0.366862 2:0.318112 3:0.645201 5:0.672953  
1.28 1:0.281333 2:0.354313 3:0.788949 5:0.670312  
1.28 1:0.690715 2:0.131162 3:0.787703 5:0.625018  
1.28 1:0.519239 2:0.40515 3:0.806813 4:0.181818  
1.28 1:0.879688 2:0.145797 3:0.697549 5:0.710296  
1.28 1:0.425763 2:0.402949 3:0.743249  
1.28 1:0.282727 2:0.214789 3:0.840465 5:0.624444  
1.28 1:0.466402 2:0.165493 3:0.857914  
1.28 1:0.411055 2:0.326915 3:0.709597 4:0.0909091  
1.28 1:0.32929 2:0.263094 3:0.636892 5:0.685984  
1.28 1:0.616548 2:0.294014 3:0.724138 4:0.0909091  
1.28 1:0.427157 2:0.238996 3:0.62983 5:0.74474  
1.28 1:0.623658 2:0.113006 3:0.57499 5:0.668102  
1.28 1:0.379757 2:0.307768 3:0.632738 5:0.705215  
1.28 1:0.638993 2:0.299956 3:0.742833 4:0.0909091  
1.28 1:0.487592 2:0.105854 3:0.614873 5:0.778581  
1.28 1:0.277778 2:0.453345 3:0.716244 4:0.0909091  
1.28 1:0.545936 2:0.178917 3:0.8172

1.28 1:0.626168 2:0.182328 3:0.592023 4:0.0909091 5:0.702632  
1.28 1:0.392304 2:0.204996 3:0.752804 5:0.74807  
1.28 1:0.72278 2:0.345401 3:0.882842 4:0.0909091  
1.28 1:0.469748 2:0.175176 3:0.5887 5:0.741726  
1.28 1:0.622334 2:0.459177 3:0.731201 5:0.760671  
1.28 1:0.744598 2:0.096721 3:0.726215 5:0.786791  
1.28 1:0.729332 2:0.282901 3:0.619028 5:0.528373  
1.28 1:0.268507 2:0.262324 3:0.847943 5:0.773128  
1.28 1:0.317719 2:0.217099 3:0.724969 4:0.0909091  
1.28 1:0.590687 2:0.295995 3:0.643955 5:0.823129  
1.28 1:0.637321 2:0.194542 3:0.65268 5:0.729872  
1.28 1:0.785655 2:0.151188 3:0.776485 5:0.765493  
1.28 1:0.596961 2:0.145026 3:0.64354 5:0.734292  
1.28 1:0.871672 2:0.18772 3:0.709182 5:0.651339  
1.28 1:0.6208 2:0.450924 3:0.683423 4:0.181818 5:0.89107  
1.28 1:0.498257 2:0.113776 3:0.851267  
1.28 1:0.291928 2:0.224032 3:0.608641 5:0.801516  
1.28 1:0.295274 2:0.111136 3:0.637308  
1.28 1:0.258818 2:0.229423 3:0.676776 5:0.736215  
1.28 1:0.600167 2:0.144476 3:0.560449 5:0.704469  
1.28 1:0.5948 2:0.170665 3:0.685916 5:0.774075  
1.28 1:0.76314 2:0.211268 3:0.59327 5:0.668245  
1.28 1:0.5925 2:0.12368 3:0.809306  
1.28 1:0.544681 2:0.476673 3:0.684254 5:0.793766  
1.28 1:0.674055 2:0.174296 3:0.729954 5:0.746548  
1.28 1:0.628328 2:0.599032 3:0.845866 5:0.809438  
1.28 1:0.620033 2:0.263314 3:0.601163 5:0.773271  
1.28 1:0.290604 2:0.199274 3:0.731201 5:0.6212  
1.28 1:0.565175 2:0.212038 3:0.410469 5:0.758833  
1.28 1:0.343232 2:0.324934 3:0.733693  
1.28 1:0.312003 2:0.2193 3:0.551724 4:0.0909091 5:0.572462  
1.28 1:0.779311 2:0.174516 3:0.600332 5:0.76377  
1.28 1:0.425206 2:0.293794 3:0.660989 4:0.0909091 5:0.000344442  
1.28 1:0.336052 2:0.288732 3:0.695472  
1.28 1:0.559389 2:0.384133 3:0.628999 5:0.872384



1.28 1:0.345671 2:0.140955 3:0.749481 5:0.704469  
1.28 1:0.57591 2:0.238996 3:0.619443 5:0.67944  
1.28 1:0.691412 2:0.158341 3:0.598255 5:0.692414  
1.28 1:0.297086 2:0.352223 3:0.756128 5:0.722552  
1.28 1:0.714206 2:0.308319 3:0.686747 5:0.742846  
1.28 1:0.776244 2:0.475902 3:0.677607 5:0.892706  
1.28 1:0.338701 2:0.206756 3:0.687993 5:0.623899  
1.28 1:0.33424 2:0.135343 3:0.682177  
1.28 1:0.597937 2:0.264525 3:0.509348 5:0.685094  
1.28 1:0.573749 2:0.169344 3:0.57042 5:0.779816  
1.28 1:0.461871 2:0.34386 3:0.751143 4:0.0909091 5:0.793077  
1.28 1:0.343162 2:0.192121 3:0.755297 5:0.680846  
1.28 1:0.550676 2:0.192452 3:0.793519 4:0.181818  
1.28 1:0.360519 2:0.473922 3:0.618612 5:0.674043  
1.28 1:0.380733 2:0.329335 3:0.750727  
1.28 1:0.617385 2:0.115537 3:0.847528  
1.28 1:0.677123 2:0.359265 3:0.613211 5:0.868567  
1.28 1:0.697128 2:0.204555 3:0.584961 5:0.674359  
1.28 1:0.663878 2:0.15746 3:0.59784 5:0.746233  
1.28 1:0.293671 2:0.397337 3:0.741172 4:0.181818  
1.28 1:0.754845 2:0.24846 3:0.737017 5:0.794541  
1.28 1:0.622543 2:0.401629 3:0.74408 4:0.0909091  
1.28 1:0.730308 2:0.206646 3:0.692148 5:0.561641  
1.28 1:0.36491 2:0.3136 3:0.676361  
1.28 1:0.341559 2:0.258253 3:0.4113 5:0.665088  
1.28 1:0.286909 2:0.142936 3:0.592023 5:0.704469  
1.28 1:0.61613 2:0.174626 3:0.643124 5:0.525015  
1.28 1:0.307403 2:0.21864 3:0.687993 5:0.565831  
1.28 1:0.561202 2:0.271237 3:0.606149 5:0.821665  
1.28 1:0.623519 2:0.796985 3:0.713336 5:0.864233  
1.28 1:0.296947 2:0.238116 3:0.711259 5:0.728178  
1.28 1:0.487732 2:0.198724 3:0.896552  
1.28 1:0.480482 2:0.300396 3:0.560449 5:0.752174  
1.28 1:0.262024 2:0.434309 3:0.673452 5:0.758317  
1.28 1:0.281681 2:0.164062 3:0.696718 4:0.181818 5:0.744912

1.28 1:0.702147 2:0.148437 3:0.668052 5:0.69692  
1.28 1:0.404991 2:0.170555 3:0.643124 5:0.714802  
1.28 1:0.468144 2:0.120929 3:0.832572  
1.28 1:0.532831 2:0.130282 3:0.584545 5:0.670312  
1.28 1:0.377457 2:0.28092 3:0.621521 5:0.709291  
1.28 1:0.577025 2:0.395246 3:0.682592 5:0.745199  
1.28 1:0.358706 2:0.194982 3:0.743664 4:0.0909091  
1.28 1:0.339467 2:0.233715 3:0.850852 5:0.70866  
1.28 1:0.565105 2:0.31371 3:0.749481 4:0.181818  
1.28 1:0.333055 2:0.166043 3:0.668882 5:0.642527  
1.28 1:0.307333 2:0.361686 3:0.684254  
1.28 1:0.319671 2:0.237016 3:0.740341 4:0.0909091  
1.28 1:0.304893 2:0.236576 3:0.69381 5:0.796435  
1.28 1:0.644082 2:0.225352 3:0.5887 5:0.76977  
1.28 1:0.273944 2:0.194432 3:0.759867 5:0.710468  
1.28 1:0.756727 2:0.204886 3:0.76693 5:0.864663  
1.28 1:0.394117 2:0.392716 3:0.60698 4:0.181818 5:0.526135  
1.28 1:0.438519 2:0.111906 3:0.795596  
1.28 1:0.534365 2:0.447953 3:0.681762 5:0.79345  
1.28 1:0.264673 2:0.0846171 3:0.836726 5:0.597836  
1.28 1:0.779939 2:0.18882 3:0.475696 5:0.807773  
1.28 1:0.253311 2:0.278499 3:0.702534 5:0.623066  
1.28 1:0.272201 2:0.149428 3:0.738263 5:0.753667  
1.28 1:0.36735 2:0.184529 3:0.696302 5:0.79345  
1.28 1:0.689391 2:0.306008 3:0.74865 5:0.837768  
1.28 1:0.319322 2:0.225792 3:0.637723 5:0.606906  
1.28 1:0.752265 2:0.136334 3:0.600332 4:0.181818 5:0.692328  
1.28 1:0.475812 2:0.143706 3:0.806813  
1.28 1:0.283703 2:0.319432 3:0.774823 4:0.181818  
1.28 2:0.149758 3:0.709597 5:0.705273  
1.28 1:0.247525 2:0.196963 3:0.601579 5:0.582365  
1.28 1:0.294228 2:0.237566 3:0.617781 4:0.0909091 5:0.669193  
1.28 1:0.691761 2:0.276959 3:0.693394 5:0.726743  
1.28 1:0.369999 2:0.181338 3:0.690486 5:0.659433  
1.28 1:0.286003 2:0.208737 3:0.686747 4:0.181818 5:0.603462

1.28 1:0.385473 2:0.329996 3:0.747403  
1.28 1:0.31521 2:0.201364 3:0.759867 5:0.750481  
1.28 1:0.276244 2:0.302157 3:0.781471 5:0.622004  
1.28 1:0.615503 2:0.122139 3:0.418363 5:0.692672  
1.28 1:0.340443 2:0.263424 3:0.702119 5:0.778381  
1.28 1:0.460268 2:0.113446 3:0.586622 5:0.598926  
1.28 1:0.703611 2:0.179798 3:0.752389 5:0.655444  
1.28 1:0.871741 2:0.34529 3:0.728708 5:0.543931  
1.28 1:0.776732 2:0.571303 3:0.641878 5:0.85499  
1.28 1:0.323505 2:0.209287 3:0.621521 5:0.634835  
1.28 1:0.2867 2:0.242738 3:0.729123 5:0.673756  
1.28 1:0.709605 2:0.175066 3:0.747819 5:0.846121  
1.28 1:0.324899 2:0.275968 3:0.684254  
1.28 1:0.75589 2:0.444102 3:0.47985 5:0.895347  
1.28 2:0.154049 3:0.714998 5:0.692098  
1.28 1:0.661718 2:0.229423 3:0.896552  
1.28 1:0.52837 2:0.232394 3:0.659742 5:0.763053  
1.28 1:0.243134 2:0.268706 3:0.740341 5:0.777204  
1.28 1:0.676356 2:0.289173 3:0.697964 5:0.754126  
1.28 1:0.699777 2:0.18618 3:0.687162 5:0.725279  
1.28 1:0.507459 2:0.206756 3:0.717906 4:0.0909091  
1.28 1:0.585599 2:0.259243 3:0.725384 4:0.0909091  
1.28 1:0.408058 2:0.202245 3:0.40673 5:0.751112  
1.28 1:0.72759 2:0.199934 3:0.755297 5:0.621516  
1.28 1:0.865259 2:0.21996 3:0.70752 5:0.692959  
1.28 1:0.515475 2:0.241307 3:0.618197 5:0.745372  
1.28 1:0.777638 2:0.1886 3:0.598255 5:0.706392  
1.28 1:0.738255 2:0.132592 3:0.739094 5:0.776113  
1.28 1:0.340374 2:0.147337 3:0.707104 5:0.659319  
1.28 1:0.749198 2:0.240427 3:0.775239 5:0.706392  
1.28 1:0.53785 2:0.497029 3:0.559202 5:0.724275  
1.28 1:0.772898 2:0.197183 3:0.756128 5:0.870002  
1.28 1:0.639133 2:0.193222 3:0.697964 5:0.784839  
1.28 1:0.294856 2:0.243288 3:0.690486 4:0.181818 5:0.722552  
1.28 1:0.261188 2:0.289173 3:0.621521 4:0.0909091

1.28 1:0.310191 2:0.151078 3:0.754882 5:0.727633  
1.28 1:0.278545 2:0.0952905 3:0.69381 5:0.657309  
1.28 1:0.569288 2:0.180018 3:0.639385 5:0.71618  
1.28 1:0.421511 2:0.205656 3:0.609057 5:0.703579  
1.28 1:0.485362 2:0.182328 3:0.747403 4:0.181818  
1.28 1:0.448906 2:0.15746 3:0.740756 4:0.181818 5:0.000430552  
1.28 1:0.359822 2:0.275968 3:0.749481 4:0.272727 5:0.581819  
1.28 1:0.750244 2:0.203455 3:0.682177 5:0.65507  
1.28 1:0.511641 2:0.2193 3:0.83091  
1.28 1:0.551094 2:0.179798 3:0.845866 4:0.0909091  
1.28 1:0.652238 2:0.174296 3:0.684254 5:0.830563  
1.28 1:0.48822 2:0.497249 3:0.832572 5:0.873705  
1.28 1:0.618291 2:0.246919 3:0.671375 5:0.721634  
1.28 1:0.588805 2:0.296875 3:0.642709 5:0.741267  
1.28 1:0.671825 2:0.131272 3:0.624429 5:0.697523  
1.28 1:0.509968 2:0.0993618 3:0.564188 5:0.621861  
1.28 1:0.283703 2:0.396677 3:0.683423 5:0.701168  
1.28 1:0.355291 2:0.190251 3:0.5887 5:0.704555  
1.28 1:0.328593 2:0.204555 3:0.729954 5:0.698901  
1.28 1:0.349784 2:0.152399 3:0.746572 4:0.0909091  
1.28 1:0.301408 2:0.232394 3:0.644371 5:0.755045  
1.28 1:0.736651 2:0.118948 3:0.682177 5:0.756279  
1.28 1:0.315837 2:0.190801 3:0.687993 4:0.0909091  
1.28 1:0.342953 2:0.192892 3:0.687993  
1.28 1:0.558692 2:0.231624 3:0.5484 5:0.745228  
1.28 1:0.301478 2:0.198063 3:0.635646 5:0.604237  
1.28 1:0.336888 2:0.196193 3:0.683008 5:0.711674  
1.28 1:0.287537 2:0.161422 3:0.739925 4:0.181818 5:0.65662  
1.28 2:0.114767 3:0.691317 5:0.687505  
1.28 1:0.27255 2:0.183209 3:0.724969 5:0.57803  
1.28 1:0.290743 2:0.143816 3:0.752804 5:0.687505  
1.28 1:0.736303 2:0.180458 3:0.744911 5:0.619048  
1.28 1:0.556183 2:0.201254 3:0.873702  
1.28 1:0.698662 2:0.228103 3:0.553801 5:0.56873  
1.28 1:0.692388 2:0.18838 3:0.897798

1.28 1:0.716506 2:0.194542 3:0.717075 5:0.69029  
1.28 1:0.733096 2:0.200484 3:0.672622 5:0.747323  
1.28 1:0.358567 2:0.0971611 3:0.762775 5:0.624645  
1.28 1:0.291998 2:0.133473 3:0.836726 4:0.0909091 5:0.711415  
1.28 1:0.430224 2:0.383033 3:0.761113  
1.28 1:0.337795 2:0.316681 3:0.649356  
1.28 1:0.592918 2:0.194982 3:0.631076 5:0.797669  
1.28 2:0.129952 3:0.747819 5:0.732627  
1.28 1:0.695943 2:0.153059 3:0.665559 5:0.79899  
1.28 1:0.64457 2:0.149868 3:0.662651 5:0.536066  
1.28 1:0.600307 2:0.225792 3:0.733278 4:0.0909091  
1.28 1:0.744528 2:0.180568 3:0.442044 5:0.74807  
1.28 1:0.690088 2:0.163842 3:0.695056 5:0.603289  
1.28 1:0.784888 2:0.180238 3:0.712921 5:0.734349  
1.28 1:0.732678 2:0.476342 3:0.61612 5:0.822584  
1.28 1:0.636345 2:0.12632 3:0.655588 5:0.668877  
1.28 1:0.618918 2:0.212478 3:0.633153 5:0.795201  
1.28 1:0.74418 2:0.221281 3:0.74408 5:0.668303  
1.28 1:0.274641 2:0.347711 3:0.700457 5:0.583226  
1.28 1:0.321902 2:0.207416 3:0.684254 5:0.638336  
1.28 1:0.329918 2:0.197953 3:0.599086 5:0.849249  
1.28 1:0.740485 2:0.184089 3:0.475696 5:0.710439  
1.28 1:0.540917 2:0.182328 3:0.606564 5:0.717501  
1.28 1:0.32239 2:0.319542 3:0.750727 5:0.725365  
1.28 1:0.337376 2:0.214789 3:0.449107 4:0.181818 5:0.766756  
1.28 1:0.774571 2:0.181338 3:0.759867 5:0.720916  
1.28 1:0.804615 2:0.239657 3:0.456585 5:0.561985  
1.28 1:0.728426 2:0.226673 3:0.752804 5:0.706392  
1.28 1:0.284121 2:0.182768 3:0.751143 5:0.621315  
1.28 1:0.394744 2:0.243288 3:0.751973  
1.28 1:0.341698 2:0.276298 3:0.750312 4:0.0909091  
1.28 1:0.447302 2:0.214679 3:0.754882 4:0.181818  
1.28 1:0.711348 2:0.255392 3:0.728292 5:0.799793  
1.28 1:0.287606 2:0.0788952 3:0.727046 5:0.796952  
1.28 1:0.351945 2:0.537632 3:0.703365 5:0.694767

1.28 1:0.518472 2:0.175066 3:0.643955 5:0.836247  
1.28 1:0.320368 2:0.0673415 3:0.863731 5:0.694767  
1.28 1:0.274641 2:0.221611 3:0.610719 5:0.689515  
1.28 1:0.499582 2:0.135343 3:0.6344 5:0.776314  
1.28 1:0.387355 2:0.290273 3:0.75322  
1.28 1:0.737836 2:0.139965 3:0.61612 5:0.607652  
1.28 1:0.718388 2:0.178257 3:0.727046 5:0.730934  
1.28 1:0.621916 2:0.103763 3:0.713336 5:0.711588  
1.28 1:0.74641 2:0.241527 3:0.678853 5:0.766153  
1.28 1:0.597309 2:0.214899 3:0.436643 5:0.53354  
1.28 1:0.27241 2:0.226783 3:0.764853 5:0.680129  
1.28 1:0.765649 2:0.131712 3:0.759036 5:0.73811  
1.28 1:0.906176 2:0.204886 3:0.613211 5:0.860559  
1.28 1:0.726962 2:0.268596 3:0.574574 5:0.664313  
1.28 1:0.346368 2:0.111686 3:0.591608 4:0.0909091 5:0.58888  
1.28 1:0.29611 2:0.399868 3:0.807229 5:0.723471  
1.28 1:0.421093 2:0.144476 3:0.481097 5:0.592899  
1.28 1:0.603583 2:0.228653 3:0.619859 5:0.674847  
1.28 1:0.617663 2:0.209507 3:0.753635 4:0.0909091  
1.28 1:0.42179 2:0.139855 3:0.603241 5:0.676483  
1.28 1:0.586156 2:0.208847 3:0.577898 5:0.641436  
1.28 1:0.259933 2:0.409331 3:0.743664 5:0.752117  
1.28 1:0.461453 2:0.340999 3:0.729123 5:0.835845  
1.28 1:0.717622 2:0.37456 3:0.712505 5:0.77396  
1.28 1:0.607626 2:0.147887 3:0.875364  
1.28 1:0.614527 2:0.159551 3:0.648941 5:0.677545  
1.28 1:0.421093 2:0.177597 3:0.57956 5:0.743018  
1.28 1:0.499094 2:0.18871 3:0.700872 5:0.845059  
1.28 1:0.618779 2:0.579335 3:0.806813 5:0.89948  
1.28 1:0.644152 2:0.381492 3:0.714167 4:0.181818  
1.28 1:0.548724 2:0.137104 3:0.442459 5:0.821206  
1.28 1:0.286491 2:0.117187 3:0.776901 5:0.664571  
1.28 1:0.480761 2:0.118068 3:0.654757 5:0.769884  
1.28 1:0.569078 2:0.225132 3:0.474865 5:0.685123  
1.28 1:0.889865 2:0.377861 3:0.760283 5:0.629237

1.28 1:0.86972 2:0.360805 3:0.752389 5:0.863802  
1.28 1:0.761815 2:0.320312 3:0.686747 5:0.868567  
1.28 1:0.769692 2:0.251651 3:0.751973 5:0.660065  
1.28 1:0.754566 2:0.129952 3:0.724969 5:0.751887  
1.28 1:0.737906 2:0.163952 3:0.738679 5:0.706392  
1.28 1:0.715321 2:0.146787 3:0.761113 5:0.647694  
1.28 1:0.401157 2:0.357284 3:0.597424 5:0.73145  
1.28 1:0.702774 2:0.254291 3:0.578729 5:0.673441  
1.28 1:0.700404 2:0.317672 3:0.691317 5:0.721002  
1.28 1:0.795413 2:0.284661 3:0.544661 5:0.676254  
1.28 1:0.726126 2:0.402839 3:0.5887 5:0.768248  
1.28 1:0.425624 2:0.452135 3:0.751973 5:0.802377  
1.28 1:0.814164 2:0.323393 3:0.717906 5:0.691753  
1.28 1:0.270389 2:0.196853 3:0.603656 5:0.610178  
1.28 1:0.643594 2:0.261994 3:0.651433 5:0.744051  
1.28 1:0.803778 2:0.411312 3:0.826755 5:0.880393  
1.28 1:0.294019 2:0.174076 3:0.627752 5:0.612905  
1.28 1:0.261745 2:0.213688 3:0.648525 5:0.719108  
1.28 1:0.567057 2:0.181668 3:0.866639  
1.28 1:0.253172 2:0.204776 3:0.604071 5:0.757484  
1.28 1:0.327339 2:0.18728 3:0.660989  
1.28 1:0.323644 2:0.236906 3:0.66182  
1.28 1:0.735536 2:0.371809 3:0.61612 5:0.712937  
1.28 1:0.619755 2:0.162302 3:0.637308 5:0.599443  
1.28 1:0.314304 2:0.168794 3:0.785625 5:0.800654  
1.28 1:0.454273 2:0.132262 3:0.633569 5:0.6367  
1.28 1:0.276384 2:0.15702 3:0.62983 5:0.69626  
1.28 1:0.316465 2:0.206866 3:0.637723 5:0.834008  
1.28 1:0.701241 2:0.28015 3:0.616535 5:0.742846  
1.28 1:0.275547 2:0.296545 3:0.732032 4:0.181818  
1.28 1:0.257284 2:0.0825264 3:0.903199 5:0.712678  
1.28 1:0.840583 2:0.100022 3:0.741172 5:0.677832  
1.28 1:0.292904 2:0.3125 3:0.455339 5:0.673986  
1.28 1:0.769413 2:0.413732 3:0.602825 5:0.757886  
1.28 1:0.539105 2:0.149648 3:0.646863 5:0.721519

1.28 1:0.28921 2:0.289503 3:0.607811 4:0.0909091  
1.28 1:0.639272 2:0.120048 3:0.748234 4:0.181818  
1.28 2:0.130062 3:0.700042 5:0.741009  
1.28 1:0.568242 2:0.413622 3:0.612796 5:0.745171  
1.28 1:0.332148 2:0.349362 3:0.775654 5:0.738741  
1.28 1:0.465077 2:0.417364 3:0.750312 4:0.0909091  
1.28 1:0.344486 2:0.175506 3:0.769838 5:0.723413  
1.28 1:0.503834 2:0.395136 3:0.747403 4:0.0909091  
1.28 1:0.52614 2:0.178367 3:0.604071 5:0.698068  
1.28 1:0.819392 2:0.309639 3:0.427503 5:0.671632  
1.28 1:0.488289 2:0.28169 3:0.85376 4:0.0909091 5:0.000344442  
1.28 1:0.348738 2:0.243838 3:0.741172 5:0.786475  
0.1277547196087147 1:0.328802 2:0.117187 3:0.65268  
0.9093648226825034 1:0.714833 2:0.169124 3:0.867885  
1.28 1:0.545309 2:0.0972711 3:0.655172 5:0.713597  
1.28 1:0.61843 2:0.104864 3:0.71209 5:0.692873  
1.28 1:0.486059 2:0.226452 3:0.692563 5:0.774563  
1.28 1:0.650913 2:0.160321 3:0.694641 5:0.823818  
1.28 1:0.295483 2:0.189481 3:0.677607 5:0.802893  
1.28 1:0.413565 2:0.215779 3:0.646032 5:0.709263  
1.28 1:0.31507 2:0.194982 3:0.525135 5:0.725136  
1.28 1:0.454552 2:0.236466 3:0.613211 5:0.747869  
1.124151697078608 1:0.468911 2:0.258143 3:0.806813  
1.28 1:0.34602 2:0.24901 3:0.66182 5:0.685008  
1.28 1:0.346438 2:0.213358 3:0.688409  
1.28 1:0.405061 2:0.233605 3:0.742002  
1.28 1:0.450579 2:0.195643 3:0.476527 5:0.659491  
1.28 1:0.498745 2:0.25088 3:0.7258 4:0.0909091  
1.28 1:0.613481 2:0.237566 3:0.635646 5:0.738798  
1.28 1:0.421651 2:0.46776 3:0.713336  
1.28 1:0.390004 2:0.252751 3:0.455339 5:0.661644  
1.28 1:0.643594 2:0.240647 3:0.619859 5:0.725193  
1.28 1:0.363864 2:0.415383 3:0.530951 4:0.181818  
1.28 1:0.258469 2:0.359705 3:0.727046 4:0.181818  
1.28 1:0.464241 2:0.110255 3:0.658496 5:0.697178



1.28 1:0.313816 2:0.252201 3:0.655172 4:0.0909091  
1.28 1:0.348738 2:0.310299 3:0.736602 5:0.757226  
1.28 1:0.719504 2:0.221831 3:0.903199 4:0.181818  
1.28 1:0.27018 2:0.268486 3:0.684254 4:0.181818 5:0.722351  
1.28 1:0.644152 2:0.195533 3:0.669713 5:0.732914  
1.28 1:0.289907 2:0.382812 3:0.727462 5:0.70002  
1.28 1:0.47386 2:0.151518 3:0.789364 4:0.181818  
1.28 1:0.681444 2:0.158781 3:0.733693 4:0.181818  
1.28 1:0.743273 2:0.151739 3:0.78064 5:0.706392  
1.28 1:0.757842 2:0.18893 3:0.650602 5:0.620368  
1.28 1:0.425554 2:0.203785 3:0.688824 4:0.0909091  
1.28 1:0.380524 2:0.248239 3:0.708766 4:0.0909091  
1.28 1:0.284051 2:0.318772 3:0.691317 4:0.0909091  
1.28 1:0.409452 2:0.276518 3:0.617781 4:0.0909091  
1.28 1:0.583856 2:0.157901 3:0.602825 5:0.699044  
1.28 1:0.759445 2:0.195092 3:0.692148 5:0.540773  
1.28 1:0.354663 2:0.196413 3:0.587869 5:0.63561  
1.28 1:0.537781 2:0.341989 3:0.751143 5:0.785528  
1.28 1:0.396208 2:0.109925 3:0.726631 5:0.69913  
1.28 1:0.70612 2:0.152509 3:0.721645 5:0.596085  
1.28 1:0.603792 2:0.164503 3:0.84005  
1.28 1:0.376481 2:0.237016 3:0.713752 4:0.0909091 5:0.668446  
1.28 1:0.461174 2:0.351673 3:0.794765 5:0.745171  
1.28 1:0.510804 2:0.227443 3:0.833818 4:0.0909091  
1.28 1:0.411822 2:0.212368 3:0.759036 5:0.76578  
1.28 1:0.584135 2:0.353653 3:0.561695 5:0.742874  
1.28 1:0.623031 2:0.350572 3:0.673037 5:0.809466  
1.28 1:0.51889 2:0.199384 3:0.679684 4:0.0909091  
1.28 1:0.531925 2:0.194762 3:0.807229  
1.28 1:0.731145 2:0.193662 3:0.724969 5:0.706392  
1.28 1:0.624146 2:0.230634 3:0.675114 5:0.755303  
1.28 1:0.486338 2:0.284881 3:0.713752 4:0.0909091  
1.28 1:0.618848 2:0.306008 3:0.757374 4:0.0909091  
1.28 1:0.343371 2:0.261774 3:0.695472 5:0.658601  
1.28 1:0.377736 2:0.246149 3:0.410469 5:0.74807

1.28 1:0.250592 2:0.164283 3:0.78978 5:0.757858  
1.28 1:0.505019 2:0.215889 3:0.611965 5:0.684951  
1.28 1:0.564896 2:0.292364 3:0.66182 5:0.771348  
1.28 1:0.682978 2:0.166373 3:0.705027 5:0.81139  
1.28 1:0.487523 2:0.256162 3:0.476527 5:0.697035  
1.28 1:0.531995 2:0.142716 3:0.662235 5:0.724992  
1.28 1:0.552907 2:0.200704 3:0.82634  
1.28 1:0.488429 2:0.21897 3:0.632322 5:0.734378  
1.28 1:0.606998 2:0.231074 3:0.586207 5:0.664485  
1.28 1:0.583856 2:0.395797 3:0.823016 4:0.0909091  
1.28 1:0.662903 2:0.152949 3:0.733278 5:0.647837  
1.28 1:0.517496 2:0.148217 3:0.633984 5:0.648497  
1.167379969866279 1:0.529625 2:0.15636 3:0.794765  
1.28 1:0.342604 2:0.172205 3:0.610303 5:0.706421  
1.28 1:0.30573 2:0.34408 3:0.729123 5:0.724389  
1.28 1:0.615851 2:0.148107 3:0.772746 4:0.181818  
1.28 1:0.613342 2:0.207967 3:0.680931 5:0.765579  
1.28 1:0.501185 2:0.149538 3:0.713336 5:0.844198  
1.28 1:0.547121 2:0.340119 3:0.685501 5:0.778065  
1.28 1:0.272968 2:0.143376 3:0.753635 4:0.181818 5:0.605299  
1.28 1:0.463753 2:0.292033 3:0.805983 4:0.0909091  
1.28 1:0.698592 2:0.233825 3:0.731201 5:0.619794  
1.28 1:0.787258 2:0.333077 3:0.786872 5:0.807888  
1.28 1:0.386867 2:0.195533 3:0.719568 5:0.668446  
1.28 1:0.411125 2:0.221831 3:0.756128  
1.28 1:0.615712 2:0.309089 3:0.794765 4:0.0909091  
1.28 1:0.582044 2:0.166153 3:0.651433 5:0.795746  
1.28 1:0.683326 2:0.28147 3:0.773162 5:0.8696  
1.28 1:0.552279 2:0.138754 3:0.856668  
1.28 1:0.629235 2:0.148658 3:0.679269 5:0.765292  
1.28 1:0.615781 2:0.133803 3:0.645201 5:0.801142  
0.3287616796247663 1:0.548376 2:0.101562 3:0.73951 4:0.181818  
1.28 1:0.491635 2:0.305238 3:0.673037 5:0.795459  
1.28 1:0.349157 2:0.329005 3:0.737432  
1.28 1:0.80336 2:0.207636 3:0.746157 5:0.812624

1.28 1:0.576049 2:0.181668 3:0.877856  
1.28 1:0.466611 2:0.158231 3:0.401329 5:0.714458  
0.08317559903627125 1:0.52126 2:0.49868 3:0.542584 4:0.181818 5:0.745831  
1.28 1:0.364004 2:0.283781 3:0.695056  
1.216675597247822 1:0.64938 2:0.31173 3:0.658496 5:0.717472  
1.28 1:0.619197 2:0.293574 3:0.763606 4:0.0909091  
1.28 1:0.414332 2:0.372249 3:0.727462  
1.28 1:0.301617 2:0.201585 3:0.585376 5:0.751514  
1.28 1:0.40513 2:0.231624 3:0.743249  
1.28 1:0.762582 2:0.189261 3:0.701703 5:0.695973  
1.28 1:0.641085 2:0.113666 3:0.520565 5:0.731766  
1.28 1:0.666109 2:0.183979 3:0.671791 5:0.702144  
1.28 1:0.790813 2:0.221941 3:0.761113 5:0.684348  
1.28 1:0.464101 2:0.236906 3:0.794765 4:0.0909091  
1.28 1:0.320786 2:0.167254 3:0.788118 5:0.774649  
1.28 1:0.337934 2:0.265295 3:0.648525 5:0.595511  
1.28 1:0.533319 2:0.15691 3:0.523473 5:0.795201  
1.28 1:0.577513 2:0.231184 3:0.466971 5:0.644393  
1.28 1:0.66597 2:0.203785 3:0.636892 5:0.68541  
1.28 1:0.640736 2:0.154599 3:0.459909 5:0.731795  
1.28 1:0.338352 2:0.190251 3:0.665559  
1.28 1:0.471909 2:0.452355 3:0.614458 5:0.778065  
1.28 1:0.54273 2:0.266835 3:0.879103 4:0.181818  
1.28 1:0.363934 2:0.21985 3:0.618197 4:0.0909091 5:0.632079  
1.28 1:0.275617 2:0.362566 3:0.660573 5:0.72525  
1.28 2:0.196303 3:0.869963 5:0.789833  
1.28 1:0.639063 2:0.160761 3:0.764437 5:0.487155  
1.28 1:0.615921 2:0.149648 3:0.855006  
1.28 1:0.289419 2:0.135123 3:0.471541 5:0.641207  
1.28 1:0.257005 2:0.0710827 3:0.472788 5:0.708631  
1.28 1:0.699986 2:0.458187 3:0.594516 5:0.805075  
1.28 1:0.47623 2:0.243068 3:0.696718 4:0.181818  
1.28 1:0.260491 2:0.418244 3:0.455339 5:0.749017  
1.28 1:0.431619 2:0.31316 3:0.358122 5:0.723356  
1.28 1:0.480622 2:0.243728 3:0.736602 4:0.0909091

1.28 1:0.283703 2:0.230414 3:0.726631 5:0.618445  
1.28 1:0.316604 2:0.176717 3:0.752389 5:0.723901  
1.28 1:0.268298 2:0.182879 3:0.751973 5:0.638882  
1.28 1:0.305172 2:0.159551 3:0.758205 5:0.708258  
1.28 1:0.536108 2:0.180348 3:0.42958 5:0.580499  
1.28 1:0.50941 2:0.230304 3:0.606149 4:0.0909091 5:0.793852  
1.28 1:0.344556 2:0.296765 3:0.726215  
1.28 1:0.295274 2:0.310629 3:0.736602 5:0.703264  
1.28 1:0.532762 2:0.113556 3:0.903199  
1.28 1:0.507946 2:0.153169 3:0.418363 5:0.807228  
1.28 1:0.281821 2:0.24901 3:0.754882 5:0.727346  
1.28 1:0.59236 2:0.103213 3:0.714582 5:0.600189  
1.28 1:0.314373 2:0.211488 3:0.64354 5:0.657395  
1.28 1:0.72752 2:0.147117 3:0.792273 5:0.73323  
1.28 1:0.349784 2:0.542694 3:0.639385 5:0.898677  
1.28 1:0.71093 2:0.181998 3:0.76236 5:0.807314  
1.28 1:0.604419 2:0.182768 3:0.640631 5:0.766813  
1.28 1:0.285376 2:0.284331 3:0.742418 5:0.746548  
1.28 1:0.397463 2:0.162742 3:0.772331 5:0.787594  
1.28 1:0.482922 2:0.236906 3:0.8172  
1.28 1:0.467726 2:0.141945 3:0.798504 4:0.181818  
1.28 1:0.835843 2:0.194102 3:0.679269 5:0.651396  
1.28 1:0.623101 2:0.145797 3:0.619443 5:0.680215  
1.28 1:0.527394 2:0.301717 3:0.659742 5:0.771233  
1.28 1:0.319601 2:0.283011 3:0.696302 4:0.181818  
1.28 1:0.700265 2:0.176166 3:0.617781 4:0.181818 5:0.589713  
1.28 1:0.675589 2:0.297535 3:0.605318 5:0.730848  
1.28 1:0.568869 2:0.180678 3:0.643124 5:0.72304  
1.28 1:0.758051 2:0.149978 3:0.779393 5:0.598955  
1.28 1:0.539872 2:0.116527 3:0.748234 4:0.0909091  
1.28 1:0.26293 2:0.169124 3:0.759452 5:0.652803  
1.28 1:0.742576 2:0.18618 3:0.737848 5:0.718677  
1.28 1:0.840722 2:0.349032 3:0.790611 5:0.706392  
1.28 1:0.334518 2:0.203235 3:0.611965 5:0.684951  
1.28 1:0.558901 2:0.202245 3:0.869132 4:0.181818

1.28 1:0.651401 2:0.190911 3:0.734109 4:0.181818  
1.28 1:0.654956 2:0.295004 3:0.491068 5:0.853899  
1.28 1:0.424857 2:0.269696 3:0.738263 4:0.0909091  
1.28 1:0.27478 2:0.18849 3:0.731201 4:0.272727 5:0.761446  
1.28 1:0.311167 2:0.0853873 3:0.688409  
1.28 1:0.273874 2:0.12445 3:0.760698 5:0.813973  
1.28 1:0.411334 2:0.168354 3:0.596178 5:0.687104  
1.28 1:0.729681 2:0.179798 3:0.668467 4:0.0909091 5:0.631247  
1.28 1:0.56873 2:0.162962 3:0.903199  
1.28 1:0.489823 2:0.277619 3:0.665974 4:0.181818  
1.28 1:0.392792 2:0.322623 3:0.700872 5:0.710095  
1.28 1:0.370835 2:0.308209 3:0.630245 4:0.181818  
1.28 1:0.306009 2:0.179357 3:0.770253 5:0.757427  
1.28 1:0.272968 2:0.266065 3:0.768592 4:0.181818  
1.28 1:0.416702 2:0.21798 3:0.560449 5:0.668619  
1.28 1:0.384985 2:0.139635 3:0.831325 5:0.894084  
1.28 1:0.570124 2:0.205876 3:0.613627 5:0.740406  
1.28 1:0.428203 2:0.177927 3:0.755297 4:0.0909091  
1.28 1:0.454621 2:0.212038 3:0.643955 5:0.689773  
1.28 1:0.410637 2:0.273437 3:0.774408  
0.003889786859553276 1:0.434546 2:0.294124 3:0.774408  
1.28 1:0.31995 2:0.292474 3:0.722476 5:0.779529  
1.28 1:0.475464 2:0.175616 3:0.753635 4:0.0909091  
1.28 1:0.35076 2:0.447183 3:0.713336 5:0.695313  
1.28 1:0.574028 2:0.349802 3:0.731201 4:0.181818  
1.28 1:0.356127 2:0.256052 3:0.712921 4:0.181818  
1.28 1:0.418165 2:0.220511 3:0.685085 5:0.730934  
1.28 1:0.546912 2:0.175286 3:0.601994 5:0.741152  
1.28 1:0.256866 2:0.296325 3:0.672622 5:0.711846  
1.28 1:0.256378 2:0.147337 3:0.469464 5:0.698441  
1.28 1:0.686254 2:0.299406 3:0.744911 4:0.181818  
1.28 1:0.298132 2:0.139415 3:0.650602  
1.28 1:0.409522 2:0.131382 3:0.679684 5:0.706651  
1.28 1:0.387007 2:0.330656 3:0.446199 4:0.181818 5:0.678837  
1.28 1:0.427994 2:0.205546 3:0.452846 5:0.664514

1.28 1:0.280217 2:0.119058 3:0.738263 5:0.510405  
1.28 1:0.311515 2:0.130502 3:0.74865 5:0.69072  
1.28 1:0.2653 2:0.233165 3:0.750312 5:0.617239  
1.28 1:0.438589 2:0.183099 3:0.703365 5:0.736588  
1.28 1:0.249408 2:0.442562 3:0.770253 5:0.651396  
1.28 1:0.49045 2:0.506822 3:0.774408 5:0.725078  
1.28 1:0.347135 2:0.329115 3:0.835064 5:0.710382  
1.28 1:0.664366 2:0.358165 3:0.753635 5:0.856196  
1.28 1:0.301617 2:0.119058 3:0.591608 5:0.600534  
1.28 1:0.387564 2:0.260013 3:0.698795  
1.28 1:0.429318 2:0.330106 3:0.663482 4:0.0909091 5:0.720313  
1.28 1:0.655583 2:0.134573 3:0.691732 5:0.677201  
1.28 1:0.375017 2:0.190691 3:0.713336  
1.28 1:0.403318 2:0.221501 3:0.693394 4:0.0909091  
1.28 1:0.592988 2:0.176386 3:0.671375 5:0.728178  
1.28 1:0.726962 2:0.296655 3:0.74408 5:0.820115  
1.28 1:0.598355 2:0.379511 3:0.570835 5:0.726284  
1.28 1:0.284748 2:0.173195 3:0.756959 5:0.666351  
1.28 1:0.686463 2:0.147447 3:0.610303 5:0.650708  
1.28 1:0.31033 2:0.152949 3:0.877856 5:0.793852  
1.28 1:0.284121 2:0.15691 3:0.705858 5:0.570338  
1.28 1:0.690297 2:0.260563 3:0.643124 5:0.674043  
1.28 1:0.562108 2:0.136664 3:0.585376 5:0.587962  
1.28 1:0.313676 2:0.258253 3:0.733693 5:0.615144  
1.28 1:0.681305 2:0.170995 3:0.861238  
1.28 1:0.494772 2:0.129842 3:0.76236 4:0.181818  
1.28 1:0.319741 2:0.178807 3:0.690486 5:0.765005  
1.28 1:0.250732 2:0.257262 3:0.613627 5:0.602313  
1.28 1:0.29869 2:0.165163 3:0.845866 5:0.699647  
1.28 1:0.273177 2:0.298085 3:0.743249 4:0.181818  
1.28 1:0.43357 2:0.255172 3:0.683423 4:0.0909091  
1.28 1:0.399414 2:0.266175 3:0.725384 5:0.6925  
1.28 1:0.449254 2:0.215449 3:0.788949 4:0.181818  
1.28 1:0.460546 2:0.225682 3:0.806398  
1.28 1:0.556183 2:0.154379 3:0.648941 5:0.755188

1.28 1:0.378503 2:0.201915 3:0.672622 5:0.724389  
1.28 1:0.437753 2:0.305458 3:0.827586 4:0.181818  
1.28 1:0.654468 2:0.413182 3:0.622351 5:0.780906  
1.28 1:0.267252 2:0.0752641 3:0.772746 5:0.722552  
1.28 1:0.507877 2:0.195423 3:0.66182 5:0.743879  
1.28 1:0.296041 2:0.142386 3:0.688409 5:0.73722  
1.28 1:0.260072 2:0.177157 3:0.744911 5:0.589024  
1.28 2:0.158121 3:0.753635 5:0.673383  
1.28 1:0.245086 2:0.567452 3:0.746572 5:0.685439  
1.28 1:0.821344 2:0.260673 3:0.779809 5:0.710095  
1.28 1:0.558413 2:0.226122 3:0.639801 5:0.753581  
1.28 1:0.669664 2:0.290713 3:0.691732 5:0.812423  
1.28 1:0.30092 2:0.339569 3:0.600748 4:0.0909091  
1.28 1:0.677332 2:0.160321 3:0.737848 5:0.523322  
1.28 1:0.464868 2:0.262654 3:0.692979 5:0.802606  
1.28 1:0.39809 2:0.306558 3:0.586622 5:0.761991  
1.28 1:0.380176 2:0.323614 3:0.699211  
1.28 1:0.314861 2:0.292914 3:0.691317 5:0.591521  
1.28 1:0.695664 2:0.179027 3:0.6801 5:0.66615  
1.28 1:0.37913 2:0.180348 3:0.809306 5:0.786561  
1.28 1:0.522585 2:0.153059 3:0.8172  
1.28 1:0.678029 2:0.227443 3:0.709182 5:0.724877  
1.28 1:0.778684 2:0.139195 3:0.68467 5:0.821005  
1.28 1:0.822808 2:0.253191 3:0.853344 5:0.706392  
1.28 1:0.738673 2:0.114437 3:0.77607 5:0.707512  
1.28 1:0.705493 2:0.153939 3:0.611965 5:0.706392  
1.28 1:0.316325 2:0.215229 3:0.764022 5:0.725279  
1.28 1:0.427576 2:0.265405 3:0.655588 5:0.807228  
1.28 1:0.693573 2:0.0821963 3:0.65725 5:0.657625  
1.28 1:0.692109 2:0.200704 3:0.459909 5:0.750481  
1.28 1:0.732608 2:0.25132 3:0.713336 5:0.700824  
1.28 1:0.543218 2:0.191241 3:0.827171 4:0.0909091  
1.28 1:0.567754 2:0.297975 3:0.739925 4:0.0909091  
1.28 1:0.348111 2:0.386224 3:0.656834 5:0.715692  
1.28 1:0.337097 2:0.50055 3:0.645201

1.28 1:0.538966 2:0.235255 3:0.589115 5:0.73633  
1.28 1:0.299387 2:0.212148 3:0.566681 5:0.599587  
1.28 1:0.704656 2:0.161532 3:0.66182 5:0.716324  
1.28 1:0.787606 2:0.34452 3:0.642709 5:0.853899  
1.28 1:0.673568 2:0.292694 3:0.618197 5:0.820402  
1.28 1:0.613202 2:0.199384 3:0.674283 5:0.787881  
1.28 1:0.750105 2:0.212588 3:0.814707 4:0.181818  
1.28 1:0.67524 2:0.243948 3:0.84462 4:0.181818  
1.28 1:0.607486 2:0.255832 3:0.772746 4:0.0909091  
1.28 1:0.486268 2:0.138644 3:0.635646 5:0.721548  
1.28 1:0.810121 2:0.179687 3:0.819277 5:0.59752  
1.28 1:0.426948 2:0.326915 3:0.692979 4:0.181818  
1.28 1:0.386867 2:0.272887 3:0.713336  
1.28 1:0.437683 2:0.569322 3:0.751973 5:0.823043  
1.28 1:0.513244 2:0.171875 3:0.691317 4:0.0909091  
1.28 1:0.569357 2:0.207857 3:0.52015 5:0.738856  
1.28 1:0.600586 2:0.109375 3:0.641878 5:0.604438  
1.28 1:0.418165 2:0.303037 3:0.731201  
1.28 1:0.584902 2:0.177597 3:0.459909 5:0.729699  
1.28 1:0.806636 2:0.204996 3:0.761113 5:0.718075  
1.28 1:0.562456 2:0.132372 3:0.677607 5:0.673211  
1.28 1:0.405339 2:0.170004 3:0.763191 4:0.0909091  
1.28 1:0.692249 2:0.270357 3:0.651433 5:0.781882  
1.28 1:0.409452 2:0.265515 3:0.73951 4:0.0909091  
1.28 1:0.498815 2:0.12566 3:0.791442  
1.28 1:0.268298 2:0.170995 3:0.682177 5:0.722839  
1.28 1:0.434198 2:0.177487 3:0.535106 5:0.69072  
1.28 1:0.535689 2:0.176166 3:0.711259 4:0.0909091  
1.28 1:0.574725 2:0.284441 3:0.572497 5:0.821149  
1.28 1:0.621428 2:0.130062 3:0.684254 5:0.583886  
1.28 1:0.56169 2:0.169124 3:0.746572 4:0.0909091  
1.28 1:0.496166 2:0.177267 3:0.815538  
1.28 2:0.174736 3:0.769838 5:0.768019  
1.28 1:0.496933 2:0.18893 3:0.686747 4:0.0909091  
1.28 1:0.461034 2:0.177597 3:0.696718 4:0.0909091



1.28 1:0.346229 2:0.236356 3:0.673868  
1.28 1:0.431409 2:0.440801 3:0.695887 5:0.722437  
1.28 1:0.444166 2:0.297865 3:0.692979 5:0.871208  
1.28 1:0.551234 2:0.15592 3:0.639801 5:0.718075  
1.28 1:0.387704 2:0.216879 3:0.709597 4:0.0909091  
1.28 1:0.419978 2:0.302707 3:0.769838  
1.28 1:0.325457 2:0.28158 3:0.742002 5:0.680301  
1.28 1:0.683535 2:0.15625 3:0.746988 5:0.855449  
1.28 1:0.396766 2:0.377861 3:0.804736 4:0.0909091  
1.28 1:0.565663 2:0.0709727 3:0.796012  
1.28 1:0.601631 2:0.171325 3:0.735355 4:0.0909091  
1.28 1:0.661299 2:0.0908891 3:0.764022 5:0.673096  
1.28 1:0.28426 2:0.166703 3:0.724553 5:0.726944  
1.28 1:0.534853 2:0.167254 3:0.877025 4:0.181818  
1.28 1:0.548167 2:0.0861576 3:0.564188 5:0.618474  
1.28 1:0.323505 2:0.297755 3:0.676776  
1.28 1:0.303848 2:0.271567 3:0.736186 5:0.625621  
1.28 1:0.594033 2:0.327905 3:0.463232 5:0.682454  
1.28 1:0.349226 2:0.137214 3:0.522227 5:0.776658  
1.28 1:0.442702 2:0.225352 3:0.77607  
1.28 1:0.392095 2:0.433539 3:0.721645  
1.28 1:0.251917 2:0.275858 3:0.687993 4:0.0909091  
1.28 1:0.37669 2:0.235145 3:0.694641  
1.28 1:0.274571 2:0.133033 3:0.610719 5:0.830449  
1.28 1:0.257772 2:0.257482 3:0.724969 5:0.639513  
1.28 1:0.258539 2:0.387764 3:0.636477 4:0.0909091  
1.28 1:0.350272 2:0.270246 3:0.764437 4:0.181818  
1.28 1:0.480901 2:0.15603 3:0.791026 5:0.000430552  
1.28 1:0.418026 2:0.27971 3:0.747819 4:0.181818  
1.28 1:0.585041 2:0.170224 3:0.750312 4:0.0909091  
1.28 1:0.377178 2:0.203125 3:0.724138  
1.28 1:0.677123 2:0.263534 3:0.709182 5:0.770257  
1.28 1:0.396069 2:0.199934 3:0.734109 5:0.725193  
1.28 1:0.296807 2:0.229864 3:0.789364 4:0.181818 5:0.65619  
1.28 1:0.456713 2:0.380282 3:0.693394 4:0.181818

1.28 1:0.346368 2:0.147887 3:0.695056  
1.28 1:0.423533 2:0.299186 3:0.630245 4:0.181818  
1.28 1:0.75589 2:0.223371 3:0.683839 5:0.798042  
1.28 1:0.59473 2:0.215119 3:0.519319 5:0.810414  
1.28 1:0.524049 2:0.261994 3:0.692979 4:0.181818  
1.28 1:0.400599 2:0.451254 3:0.723307  
1.28 1:0.567824 2:0.136994 3:0.677192 5:0.727891  
1.28 1:0.686533 2:0.255832 3:0.660158 5:0.750538  
1.28 1:0.657187 2:0.335607 3:0.797258 5:0.823789  
1.28 1:0.335146 2:0.287192 3:0.665559 5:0.792043  
1.28 1:0.283494 2:0.138974 3:0.389281 5:0.69072  
1.28 1:0.333333 2:0.181998 3:0.682177 5:0.694595  
1.28 1:0.307054 2:0.130942 3:0.600332 5:0.645541  
1.28 1:0.372787 2:0.203675 3:0.731201  
1.28 1:0.280705 2:0.236356 3:0.599917 4:0.181818 5:0.467235  
1.28 1:0.268507 2:0.232835 3:0.744911 5:0.650507  
1.28 1:0.273526 2:0.192782 3:0.760698 5:0.619966  
1.28 1:0.586017 2:0.190581 3:0.83091  
1.28 1:0.387774 2:0.211268 3:0.713336  
1.28 1:0.572912 2:0.121589 3:0.757374 4:0.0909091  
1.28 1:0.386379 2:0.352333 3:0.702534  
1.28 1:0.440471 2:0.459947 3:0.751973 4:0.0909091 5:0.767875  
1.28 1:0.696152 2:0.262324 3:0.761944 5:0.8293  
1.28 1:0.280984 2:0.121039 3:0.65268  
1.28 1:0.423254 2:0.240647 3:0.732032 5:0.750251  
1.28 1:0.314792 2:0.168684 3:0.769007 5:0.612446  
1.28 1:0.349854 2:0.146457 3:0.663066 5:0.628491  
1.28 1:0.259166 2:0.147007 3:0.754051 5:0.623066  
1.28 1:0.461034 2:0.136224 3:0.827586  
1.28 1:0.624425 2:0.202245 3:0.559202 5:0.774821  
1.28 1:0.341419 2:0.270907 3:0.729123 4:0.0909091  
1.28 1:0.50941 2:0.143046 3:0.793934  
1.28 1:0.251777 2:0.365537 3:0.750727 4:0.181818  
1.28 1:0.380315 2:0.37401 3:0.807229 5:0.826516  
1.28 1:0.674683 2:0.194872 3:0.640631 5:0.620368

1.28 1:0.278266 2:0.322733 3:0.77607 4:0.0909091  
1.28 1:0.647428 2:0.140185 3:0.695887 5:0.755561  
1.28 1:0.688206 2:0.15559 3:0.729539 5:0.713769  
1.28 1:0.869302 2:0.204886 3:0.755713 5:0.775539  
1.28 1:0.325317 2:0.15702 3:0.551724 5:0.684951  
1.28 1:0.384149 2:0.301827 3:0.749481 5:0.722552  
1.28 1:0.757493 2:0.769916 3:0.605318 5:0.851517  
1.28 1:0.480064 2:0.324384 3:0.735771 4:0.181818  
1.28 1:0.312073 2:0.244938 3:0.601579 4:0.0909091  
1.28 1:0.497421 2:0.147997 3:0.798504  
1.28 1:0.482086 2:0.103103 3:0.79435  
1.28 1:0.303987 2:0.233165 3:0.686747 4:0.0909091  
1.28 1:0.504391 2:0.158561 3:0.564188 5:0.622377  
1.28 1:0.393211 2:0.237346 3:0.747403  
1.28 1:0.321135 2:0.31162 3:0.697133  
1.28 1:0.418374 2:0.174516 3:0.854591 4:0.0909091  
1.28 1:0.499024 2:0.377091 3:0.610303 5:0.72881  
1.28 1:0.326502 2:0.263644 3:0.690071  
1.28 1:0.418165 2:0.204335 3:0.596178 5:0.690089  
1.28 1:0.262442 2:0.21919 3:0.791442 5:0.618158  
1.28 1:0.475464 2:0.196963 3:0.813876  
1.28 1:0.275617 2:0.18684 3:0.753635 5:0.645857  
1.28 1:0.489962 2:0.12621 3:0.602825 5:0.7268  
1.28 1:0.624076 2:0.224032 3:0.442044 5:0.742817  
1.28 1:0.274571 2:0.212368 3:0.82634 4:0.181818 5:0.748931  
1.28 1:0.264046 2:0.118948 3:0.632322 4:0.181818 5:0.591665  
1.28 1:0.603583 2:0.152949 3:0.602825 5:0.749878  
1.28 1:0.359194 2:0.0912192 3:0.750312 5:0.602744  
1.28 1:0.544891 2:0.112016 3:0.843789 4:0.181818  
1.28 1:0.441656 2:0.200594 3:0.61612 5:0.747754  
1.28 1:0.423533 2:0.236796 3:0.709597 5:0.720945  
1.28 1:0.748153 2:0.28026 3:0.585791 4:0.0909091 5:0.709291  
1.28 1:0.307403 2:0.114217 3:0.695887 5:0.735067  
1.28 1:0.515475 2:0.306668 3:0.617781 5:0.824679  
1.28 1:0.399624 2:0.274538 3:0.749481

1.28 2:0.191131 3:0.846282 5:0.731163  
1.28 1:0.323087 2:0.255612 3:0.755297 4:0.0909091  
1.28 1:0.484037 2:0.260783 3:0.732032 4:0.0909091  
1.28 1:0.551164 2:0.150968 3:0.650187 5:0.664514  
1.28 1:0.57584 2:0.275748 3:0.564603 5:0.665719  
1.28 1:0.686324 2:0.237566 3:0.659742 5:0.758403  
1.28 1:0.540499 2:0.137544 3:0.798504  
1.28 1:0.326293 2:0.15757 3:0.747819 4:0.0909091 5:0.660007  
1.28 1:0.70368 2:0.201585 3:0.764022 5:0.652458  
1.28 1:0.349993 2:0.172095 3:0.695056  
1.28 1:0.356685 2:0.167364 3:0.683839  
1.28 1:0.484734 2:0.239877 3:0.629414 5:0.698068  
1.28 1:0.278475 2:0.170004 3:0.380972 5:0.748873  
1.28 1:0.447651 2:0.199164 3:0.777732  
1.28 1:0.252684 2:0.471501 3:0.604902 5:0.716266  
1.28 1:0.418862 2:0.269146 3:0.747403  
1.28 1:0.311376 2:0.174626 3:0.783963 5:0.647349  
1.28 1:0.306985 2:0.347711 3:0.713336 4:0.181818  
1.28 1:0.749617 2:0.215339 3:0.744495 5:0.759695  
1.28 1:0.479437 2:0.658011 3:0.851267 4:0.0909091  
1.28 1:0.323993 2:0.292804 3:0.682177 5:0.6367  
1.28 1:0.378851 2:0.237236 3:0.745326  
1.28 1:0.273317 2:0.166153 3:0.57956 5:0.685668  
1.28 1:0.421093 2:0.169454 3:0.686747 5:0.688567  
1.28 1:0.462916 2:0.184089 3:0.589115 5:0.661443  
1.28 1:0.34846 2:0.287302 3:0.693394  
1.28 1:0.334937 2:0.153939 3:0.756128 5:0.649158  
1.28 1:0.381291 2:0.203345 3:0.714998 4:0.0909091  
1.28 1:0.484386 2:0.185079 3:0.722476 4:0.0909091  
1.28 1:0.449254 2:0.323063 3:0.65268 4:0.181818  
1.28 1:0.523351 2:0.278499 3:0.5887 5:0.733345  
1.28 1:0.356545 2:0.133363 3:0.57956 5:0.609949  
1.28 1:0.716297 2:0.556998 3:0.615704 5:0.805591  
1.28 1:0.271713 2:0.171875 3:0.729123 4:0.0909091 5:0.771922  
1.28 1:0.290534 2:0.389635 3:0.719568 5:0.656219

1.28 1:0.396278 2:0.370489 3:0.68467 4:0.181818  
1.28 1:0.709118 2:0.21875 3:0.696302 5:0.663251  
1.28 1:0.401366 2:0.245489 3:0.732447 4:0.181818  
1.28 1:0.273665 2:0.329445 3:0.751558 5:0.685554  
1.28 1:0.388122 2:0.215449 3:0.751973 4:0.0909091  
1.28 1:0.316046 2:0.330436 3:0.675945  
1.28 1:0.350272 2:0.212808 3:0.705442  
1.28 1:0.309842 2:0.15658 3:0.759867 5:0.599156  
1.28 1:0.583577 2:0.353543 3:0.692148 5:0.775281  
1.28 1:0.613621 2:0.18607 3:0.68467 5:0.741698  
1.28 1:0.592918 2:0.647337 3:0.611134 5:0.865352  
1.28 1:0.453158 2:0.159221 3:0.831325  
1.28 1:0.598703 2:0.103433 3:0.656834 5:0.649158  
1.28 1:0.284748 2:0.254732 3:0.728708 4:0.0909091  
1.28 1:0.533598 2:0.12412 3:0.599917 5:0.651224  
1.28 1:0.723965 2:0.241197 3:0.722892 5:0.572204  
1.28 1:0.603583 2:0.185189 3:0.613211 5:0.760556  
1.28 1:0.412589 2:0.339349 3:0.737848  
1.28 1:0.674125 2:0.40713 3:0.736602 5:0.824249  
1.28 1:0.596473 2:0.15504 3:0.693394 5:0.790723  
1.28 1:0.349296 2:0.190471 3:0.691317  
1.28 1:0.373414 2:0.28059 3:0.705027 4:0.0909091 5:0.648153  
1.28 1:0.284121 2:0.254291 3:0.723722 5:0.720888  
1.28 1:0.268019 2:0.233935 3:0.636061 5:0.661213  
1.28 1:0.393071 2:0.409991 3:0.813876 4:0.0909091  
1.28 1:0.352293 2:0.291153 3:0.729123  
1.28 1:0.286979 2:0.216659 3:0.764437 5:0.660582  
1.28 1:0.275547 2:0.179467 3:0.765268 4:0.181818 5:0.658199  
1.28 1:0.266276 2:0.195753 3:0.52015 5:0.649445  
1.28 1:0.29855 2:0.37555 3:0.518903 4:0.0909091 5:0.760527  
1.28 1:0.369929 2:0.361576 3:0.714998 4:0.0909091  
1.28 1:0.469817 2:0.108055 3:0.717491 4:0.0909091  
1.28 1:0.475254 2:0.152619 3:0.874117 4:0.181818  
1.28 1:0.482434 2:0.205216 3:0.874117  
1.28 1:0.376272 2:0.360805 3:0.70752

1.28 1:0.678517 2:0.152949 3:0.754882 5:0.664858  
1.28 1:0.701101 2:0.159441 3:0.685085 5:0.652458  
1.28 1:0.316046 2:0.336158 3:0.646032 5:0.649158  
1.28 1:0.581835 2:0.123349 3:0.741587 4:0.0909091  
1.28 1:0.415656 2:0.34375 3:0.685501 4:0.181818 5:0.785872  
1.28 1:0.46452 2:0.160211 3:0.850852  
1.28 1:0.274571 2:0.166703 3:0.52015 5:0.666265  
1.28 1:0.320577 2:0.283781 3:0.662235 4:0.181818  
1.28 1:0.448557 2:0.270687 3:0.610719 4:0.363636 5:0.547576  
1.28 1:0.592639 2:0.18728 3:0.826755  
1.28 1:0.396069 2:0.391065 3:0.718322  
1.28 1:0.614457 2:0.21864 3:0.76236 4:0.181818  
1.28 1:0.446117 2:0.139525 3:0.601579 5:0.682482  
1.28 1:0.597588 2:0.277179 3:0.754051 5:0.820402  
1.28 1:0.29395 2:0.18706 3:0.739094 4:0.272727 5:0.704469  
1.28 1:0.525024 2:0.182768 3:0.525135 5:0.65596  
1.28 1:0.312212 2:0.286422 3:0.464894 4:0.0909091 5:0.575591  
1.28 1:0.525861 2:0.206096 3:0.722061 4:0.0909091  
1.28 1:0.297156 2:0.203785 3:0.773162 5:0.689486  
1.28 1:0.350411 2:0.141285 3:0.742418 5:0.646775  
1.28 1:0.400112 2:0.232174 3:0.735771  
1.28 1:0.479716 2:0.12522 3:0.607811 5:0.652344  
1.28 1:0.358288 2:0.183319 3:0.712505  
1.28 1:0.564617 2:0.216989 3:0.613627 5:0.796004  
1.28 1:0.663739 2:0.120599 3:0.693394 5:0.644307  
1.28 1:0.387774 2:0.200264 3:0.731201 5:0.71087  
1.28 1:0.704447 2:0.366527 3:0.743249 5:0.783978  
1.28 1:0.345741 2:0.300396 3:0.725384  
1.28 1:0.267322 2:0.404049 3:0.741172 5:0.690519  
1.28 1:0.452879 2:0.197073 3:0.816784  
1.28 1:0.342813 2:0.209507 3:0.683423  
1.28 1:0.308867 2:0.133803 3:0.643124 5:0.670312  
1.28 1:0.916771 2:0.209617 3:0.660158 5:0.731938  
1.28 1:0.250174 2:0.257482 3:0.561695 5:0.741324  
1.28 1:0.34602 2:0.18816 3:0.69838

1.28 1:0.264255 2:0.204665 3:0.801828 5:0.694509  
1.28 1:0.69204 2:0.28268 3:0.598671 5:0.652458  
1.28 1:0.472466 2:0.171765 3:0.587038 5:0.780045  
1.28 1:0.588526 2:0.078125 3:0.613211 5:0.774707  
1.28 1:0.28914 2:0.221391 3:0.750312 4:0.181818 5:0.536984  
1.28 1:0.42186 2:0.243178 3:0.664728 5:0.688252  
1.28 1:0.318625 2:0.235365 3:0.712505 4:0.0909091  
1.28 1:0.46919 2:0.226783 3:0.794765  
1.28 1:0.595427 2:0.390295 3:0.621105 5:0.853899  
1.28 1:0.467726 2:0.266945 3:0.741587 4:0.181818  
1.28 1:0.306775 2:0.0912192 3:0.697549 5:0.622693  
1.28 1:0.364213 2:0.197513 3:0.694641  
1.28 1:0.582044 2:0.211598 3:0.6801 5:0.778983  
1.28 1:0.253102 2:0.408341 3:0.7258 4:0.181818  
1.28 1:0.570682 2:0.151188 3:0.671375 5:0.797554  
1.28 1:0.29151 2:0.119058 3:0.649356  
1.28 1:0.373205 2:0.304027 3:0.68924  
1.28 1:0.274571 2:0.21732 3:0.732447 4:0.0909091  
1.28 1:0.777569 2:0.117848 3:0.877856  
1.28 1:0.284748 2:0.268156 3:0.781471 4:0.0909091 5:0.645139  
1.28 1:0.385543 2:0.169454 3:0.77607 5:0.788542  
1.28 1:0.3127 2:0.341549 3:0.742833 4:0.272727  
1.28 1:0.455737 2:0.310739 3:0.732862 5:0.7361  
1.28 1:0.276802 2:0.12643 3:0.696302 4:0.181818 5:0.617239  
1.28 1:0.330615 2:0.167584 3:0.677607  
1.28 1:0.3578 2:0.274098 3:0.834649 5:0.743678  
1.28 1:0.844068 2:0.161202 3:0.830079 5:0.644307  
1.28 1:0.380315 2:0.225242 3:0.737848  
1.28 1:0.470724 2:0.461048 3:0.662651 5:0.774046  
1.28 1:0.325526 2:0.288292 3:0.639385 5:0.608973  
1.28 1:0.62087 2:0.135123 3:0.690486 5:0.690749  
1.28 1:0.331033 2:0.243288 3:0.643955 5:0.643819  
1.28 1:0.463823 2:0.15471 3:0.802659  
1.28 1:0.604977 2:0.168244 3:0.894474  
1.28 1:0.270668 2:0.200814 3:0.687162 5:0.666982

1.28 1:0.397393 2:0.114987 3:0.560033 5:0.665031  
1.28 1:0.305172 2:0.253301 3:0.585791 5:0.666982  
1.28 1:0.290813 2:0.184969 3:0.646863 5:0.650593  
1.28 1:0.358149 2:0.253631 3:0.70752  
1.28 1:0.304405 2:0.2818 3:0.713752 5:0.749419  
1.28 1:0.498606 2:0.285431 3:0.607811 5:0.745917  
1.28 1:0.371881 2:0.326364 3:0.710428 5:0.750423  
1.28 1:0.391468 2:0.317232 3:0.737017 5:0.679698  
1.28 1:0.341837 2:0.361576 3:0.720814  
1.28 1:0.621497 2:0.361356 3:0.720399 4:0.272727  
1.28 1:0.302384 2:0.373019 3:0.682177 4:0.0909091 5:0.684951  
1.28 1:0.373414 2:0.345511 3:0.746572  
1.28 1:0.618361 2:0.18893 3:0.687162 5:0.74319  
1.28 1:0.438589 2:0.171545 3:0.735355 4:0.181818  
1.28 1:0.384079 2:0.295004 3:0.702534  
1.28 1:0.382964 2:0.223922 3:0.742833 4:0.0909091  
1.28 1:0.341977 2:0.316351 3:0.729954 4:0.181818  
1.28 1:0.512408 2:0.556668 3:0.752389 5:0.75226  
1.28 1:0.415935 2:0.298746 3:0.731201  
1.28 1:0.390353 2:0.111136 3:0.683423 5:0.658601  
1.28 1:0.350829 2:0.212368 3:0.683839  
1.28 2:0.192892 3:0.777316 4:0.0909091 5:0.763139  
1.28 1:0.311794 2:0.0847271 3:0.747819 5:0.645283  
1.28 1:0.417189 2:0.457086 3:0.753635  
1.28 1:0.395441 2:0.275198 3:0.752804 4:0.0909091  
1.28 1:0.642967 2:0.223261 3:0.468218 5:0.78326  
1.28 1:0.49526 2:0.246919 3:0.631076 5:0.732599  
1.28 1:0.348111 2:0.28114 3:0.714998  
1.28 1:0.296389 2:0.236906 3:0.643955 4:0.0909091  
1.28 1:0.322808 2:0.259793 3:0.65268  
1.28 1:0.420884 2:0.158561 3:0.65268 5:0.659749  
1.28 1:0.35543 2:0.412852 3:0.695887 4:0.272727  
1.28 1:0.484037 2:0.139525 3:0.713336 4:0.0909091  
1.28 1:0.531368 2:0.28092 3:0.748234 4:0.0909091  
1.28 1:0.332776 2:0.308429 3:0.663482



1.28 1:0.373414 2:0.214018 3:0.706273  
1.28 1:0.734421 2:0.12566 3:0.761113 5:0.75183  
1.28 1:0.323017 2:0.384353 3:0.665559  
1.28 1:0.47386 2:0.298415 3:0.74408 4:0.0909091  
1.28 1:0.372857 2:0.283451 3:0.724553 5:0.742272  
1.28 1:0.260072 2:0.178257 3:0.737848 5:0.644307  
1.28 1:0.286979 2:0.167474 3:0.743249 5:0.737736  
1.28 1:0.264952 2:0.159771 3:0.641047 5:0.713654  
1.28 1:0.534156 2:0.228653 3:0.856668  
1.28 1:0.388889 2:0.136884 3:0.755297 5:0.747036  
1.28 1:0.250523 2:0.338578 3:0.746157 4:0.0909091  
1.28 1:0.320856 2:0.322183 3:0.705027  
1.28 1:0.292695 2:0.182548 3:0.773993 5:0.735986  
1.28 1:0.699986 2:0.138864 3:0.848359 4:0.0909091  
1.28 1:0.335982 2:0.202685 3:0.796427 4:0.181818  
1.28 1:0.545379 2:0.244388 3:0.542584 5:0.708574  
1.28 1:0.470236 2:0.106184 3:0.805152  
1.28 1:0.519936 2:0.357394 3:0.753635 4:0.0909091  
1.140956892584447 1:0.421999 2:0.426827 3:0.709182  
1.28 1:0.271574 2:0.284111 3:0.777316 5:0.763799  
1.28 1:0.263627 2:0.240647 3:0.684254 4:0.0909091  
1.28 1:0.304266 2:0.112786 3:0.660158 4:0.181818 5:0.750567  
1.28 1:0.33654 2:0.226783 3:0.682177  
1.28 1:0.25352 2:0.216219 3:0.426672 5:0.704469  
1.28 1:0.264046 2:0.62599 3:0.482343 4:0.0909091  
1.28 1:0.420605 2:0.115537 3:0.421271 5:0.612561  
1.28 1:0.29625 2:0.338028 3:0.695472 4:0.0909091  
1.28 1:0.284191 2:0.291593 3:0.730785 4:0.181818  
1.28 1:0.661508 2:0.194982 3:0.693394 5:0.598926  
1.28 1:0.298759 2:0.049956 3:0.659742  
1.28 1:0.562596 2:0.101673 3:0.737432 4:0.0909091  
1.28 1:0.378782 2:0.268156 3:0.742002  
1.28 1:0.303778 2:0.268926 3:0.449522 5:0.695456  
1.28 1:0.324411 2:0.445863 3:0.724553  
1.28 1:0.518402 2:0.170335 3:0.729123 4:0.0909091

1.28 1:0.671825 2:0.174846 3:0.891982  
1.28 1:0.489614 2:0.581206 3:0.732032 4:0.0909091  
1.28 1:0.426251 2:0.269806 3:0.771915  
1.28 1:0.243761 2:0.446853 3:0.717906 4:0.181818 5:0.67212  
1.28 1:0.351317 2:0.360145 3:0.681762  
1.28 1:0.262373 2:0.302267 3:0.71666 5:0.772525  
1.28 1:0.461174 2:0.118838 3:0.758621 4:0.0909091  
1.28 1:0.342953 2:0.231514 3:0.69838  
1.28 1:0.254078 2:0.242958 3:0.681762 4:0.0909091  
1.28 1:0.363516 2:0.266615 3:0.708766  
1.28 1:0.54984 2:0.477113 3:0.752389 4:0.181818  
1.28 1:0.3578 2:0.303147 3:0.751558 5:0.704469  
1.28 1:0.320438 2:0.179908 3:0.686332 4:0.0909091  
1.28 1:0.367141 2:0.299626 3:0.713336  
1.28 1:0.339746 2:0.290713 3:0.709597  
1.28 1:0.468493 2:0.12412 3:0.744495 4:0.181818  
1.28 1:0.290813 2:0.119498 3:0.565019 5:0.639226  
1.28 1:0.391329 2:0.201474 3:0.737432  
1.28 1:0.369162 2:0.195202 3:0.751143 5:0.673469  
1.28 1:0.445002 2:0.257152 3:0.452846 5:0.709377  
1.28 1:0.376202 2:0.174296 3:0.659327 4:0.0909091  
1.28 1:0.327966 2:0.215339 3:0.691732  
1.28 1:0.323505 2:0.112016 3:0.693394  
1.28 1:0.399275 2:0.34265 3:0.695056  
1.28 1:0.321971 2:0.434859 3:0.717491  
1.28 1:0.282169 2:0.289833 3:0.717491 5:0.695915  
1.28 1:0.371462 2:0.190911 3:0.7258  
1.28 1:0.545797 2:0.1864 3:0.713336 4:0.181818  
1.28 1:0.327339 2:0.40548 3:0.714998  
1.28 1:0.350969 2:0.261224 3:0.692979  
1.28 1:0.355151 2:0.330326 3:0.688409 5:0.743133  
1.28 1:0.342953 2:0.120048 3:0.688409  
1.28 1:0.350411 2:0.324934 3:0.712505  
0.241614865319551 1:0.360937 2:0.141285 3:0.712505  
1.28 1:0.450579 2:0.207526 3:0.594516 5:0.817015

1.28 1:0.397114 2:0.294124 3:0.753635  
1.28 1:0.28907 2:0.193882 3:0.77607 5:0.621057  
1.28 1:0.448906 2:0.450594 3:0.749896 4:0.0909091  
1.28 1:0.415168 2:0.323944 3:0.672206 4:0.181818  
1.28 1:0.354036 2:0.21853 3:0.691317  
1.28 1:0.322459 2:0.15493 3:0.681762  
1.28 1:0.316674 2:0.15669 3:0.671375 5:0.651626  
1.28 1:0.372996 2:0.294674 3:0.713752  
1.28 1:0.60665 2:0.12544 3:0.863731  
1.28 1:0.323853 2:0.252091 3:0.658081  
1.28 1:0.287606 2:0.408891 3:0.601994 4:0.0909091  
1.28 1:0.325805 2:0.2193 3:0.750727 5:0.694767  
1.28 1:0.406246 2:0.222821 3:0.742002  
1.28 1:0.356057 2:0.365427 3:0.751143  
1.28 1:0.410986 2:0.271897 3:0.737848  
1.28 1:0.251847 2:0.236356 3:0.74408 5:0.734895  
1.28 1:0.425763 2:0.315471 3:0.722476 4:0.0909091  
1.28 1:0.479437 2:0.0973812 3:0.826755  
1.28 1:0.303499 2:0.0984815 3:0.647279  
1.28 1:0.532971 2:0.145797 3:0.60698 5:0.783174  
1.28 1:0.463683 2:0.165713 3:0.595762 5:0.81337  
1.28 1:0.265022 2:0.18596 3:0.764437 4:0.0909091 5:0.649158  
1.28 1:0.418793 2:0.238226 3:0.749481  
1.28 1:0.275199 2:0.1864 3:0.52472 5:0.670197  
1.28 1:0.531646 2:0.279489 3:0.884504  
1.28 1:0.516869 2:0.111136 3:0.791442  
1.28 1:0.50474 2:0.233935 3:0.52015 5:0.704469  
1.28 1:0.249059 2:0.140625 3:0.459909 5:0.72881  
1.28 1:0.268995 2:0.314151 3:0.720399 5:0.67258  
1.28 1:0.560574 2:0.246479 3:0.692979 4:0.181818  
1.28 1:0.371323 2:0.37357 3:0.734109 5:0.685869  
1.28 1:0.352084 2:0.231954 3:0.70295 4:0.0909091  
1.28 1:0.415517 2:0.361906 3:0.709597  
1.28 1:0.307194 2:0.361136 3:0.677192 5:0.713798  
1.28 1:0.377875 2:0.348592 3:0.688409

1.28 1:0.401018 2:0.294344 3:0.731201 5:0.700939  
1.28 1:0.332427 2:0.185079 3:0.695056  
1.28 1:0.463404 2:0.148878 3:0.699626 4:0.0909091  
1.28 1:0.395859 2:0.388644 3:0.700042  
1.28 1:0.348181 2:0.24879 3:0.683839  
1.28 1:0.326084 2:0.238996 3:0.660573 5:0.683372  
1.28 1:0.320717 2:0.252311 3:0.609888 5:0.682367  
1.28 1:0.297226 2:0.18882 3:0.75322 5:0.704469  
1.28 1:0.359473 2:0.340999 3:0.658081 4:0.272727 5:0.684348  
1.28 1:0.401436 2:0.22018 3:0.63897 4:0.0909091  
1.28 1:0.256866 2:0.225462 3:0.589946 5:0.612015  
1.28 2:0.139415 3:0.78978 5:0.649158  
1.28 1:0.354315 2:0.112676 3:0.747403 5:0.728494  
1.28 2:0.163402 3:0.820523 5:0.700451  
1.28 1:0.402272 2:0.0996919 3:0.491068 5:0.60926  
1.28 1:0.330894 2:0.127641 3:0.740756 5:0.685984  
0.2110510444646885 1:0.273735 2:0.135343 3:0.46531 5:0.611786  
1.28 1:0.283354 2:0.228103 3:0.754882 5:0.601309  
1.28 1:0.325178 2:0.147337 3:0.651433 5:0.753581  
1.28 1:0.370068 2:0.21743 3:0.708766  
1.28 1:0.508225 2:0.260453 3:0.615704 4:0.0909091 5:0.87537  
1.28 1:0.368604 2:0.254401 3:0.677607  
1.28 1:0.340652 2:0.209067 3:0.693394  
1.28 1:0.503276 2:0.199604 3:0.849605  
1.28 1:0.264673 2:0.162632 3:0.691317 5:0.584144  
1.28 1:0.359473 2:0.379071 3:0.690486 4:0.181818  
1.28 1:0.264464 2:0.225242 3:0.756543 5:0.568271  
1.28 1:0.342395 2:0.180238 3:0.788533 4:0.0909091  
1.28 1:0.302732 2:0.258693 3:0.650187 4:0.0909091  
1.28 1:0.384079 2:0.175286 3:0.741172 5:0.773587  
1.28 1:0.299665 2:0.152839 3:0.662235  
1.28 1:0.339816 2:0.244608 3:0.709182  
1.28 1:0.839677 2:0.228213 3:0.764437 5:0.723758  
1.28 1:0.52377 2:0.37379 3:0.791026 4:0.181818  
1.28 1:0.263697 2:0.279049 3:0.813045 5:0.704469

1.28 1:0.641503 2:0.267716 3:0.591608 5:0.637274  
1.28 1:0.769762 2:0.140405 3:0.746572 5:0.709377  
1.28 1:0.263558 2:0.159551 3:0.721645 5:0.729987  
1.28 1:0.418793 2:0.195312 3:0.759867 4:0.0909091  
1.28 1:0.277499 2:0.525638 3:0.668882 5:0.80008  
1.28 1:0.41949 2:0.184309 3:0.730785 4:0.181818  
1.28 1:0.557019 2:0.119828 3:0.518488 5:0.767674  
1.28 1:0.295553 2:0.247909 3:0.728708 4:0.0909091  
1.28 1:0.332357 2:0.235145 3:0.713752 4:0.181818  
1.28 1:0.466959 2:0.180128 3:0.813045  
1.28 1:0.389098 2:0.160761 3:0.774408 4:0.0909091  
1.28 1:0.463404 2:0.114107 3:0.273785 5:0.749591  
1.28 1:0.426948 2:0.172755 3:0.768592  
0.2527255748200563 1:0.427854 2:0.191241 3:0.787287  
1.28 1:0.435104 2:0.238446 3:0.831325 4:0.0909091  
1.28 1:0.474209 2:0.164723 3:0.820939  
1.28 1:0.270598 2:0.28147 3:0.406315 4:0.181818 5:0.591865  
1.28 1:0.379548 2:0.215559 3:0.714167  
1.28 1:0.31758 2:0.158011 3:0.677192  
1.28 1:0.341001 2:0.205106 3:0.686747  
1.28 1:0.36735 2:0.319322 3:0.687993  
1.28 1:0.339677 2:0.357064 3:0.70752  
1.28 1:0.366025 2:0.287192 3:0.692563 4:0.0909091  
1.28 1:0.372299 2:0.184529 3:0.717491  
1.28 1:0.36024 2:0.242187 3:0.626091 5:0.624989  
1.28 1:0.275408 2:0.147337 3:0.603241 5:0.727776  
1.28 1:0.460198 2:0.118618 3:0.806398  
1.28 1:0.51429 2:0.209287 3:0.854175  
1.28 1:0.262373 2:0.387104 3:0.831741 4:0.272727  
1.28 1:0.250453 2:0.190581 3:0.575405 4:0.181818 5:0.691639  
0.08674756961180956 1:0.306148 2:0.352333 3:0.683839  
1.28 1:0.321065 2:0.0730634 3:0.855837 5:0.678923  
1.28 1:0.296947 2:0.129621 3:0.577482 5:0.642355  
1.28 1:0.320717 2:0.238996 3:0.75322 4:0.0909091  
1.28 1:0.692249 2:0.177047 3:0.739094 5:0.705043

1.28 1:0.446466 2:0.347381 3:0.809306 5:0.76799  
1.28 1:0.301896 2:0.191131 3:0.692979 4:0.0909091 5:0.583886  
1.28 1:0.500558 2:0.165493 3:0.575405 5:0.745773  
1.28 1:0.360588 2:0.258143 3:0.695472  
1.28 1:0.384079 2:0.310079 3:0.749896  
1.28 1:0.506274 2:0.254732 3:0.739925 4:0.0909091  
1.28 1:0.253729 2:0.362786 3:0.683839 4:0.0909091  
1.28 1:0.345044 2:0.244168 3:0.714998  
1.28 1:0.263279 2:0.391945 3:0.731201 4:0.181818  
1.28 1:0.383103 2:0.489767 3:0.684254  
1.28 1:0.261676 2:0.236796 3:0.792688 5:0.645283  
1.28 1:0.247038 2:0.355194 3:0.688409 4:0.0909091  
1.28 1:0.354733 2:0.178807 3:0.560449 5:0.64356  
1.28 1:0.330127 2:0.321523 3:0.667636 4:0.0909091  
1.053474171238142 1:0.343301 2:0.241747 3:0.660158  
1.28 1:0.365677 2:0.286972 3:0.407561 5:0.777146  
1.28 1:0.4029 2:0.333847 3:0.655172 5:0.723126  
1.28 1:0.283563 2:0.422095 3:0.809306 5:0.658056  
1.28 1:0.409034 2:0.114767 3:0.606564 5:0.760068  
1.28 1:0.488568 2:0.512104 3:0.70752 4:0.181818  
1.28 1:0.38387 2:0.270797 3:0.737432  
1.28 1:0.300153 2:0.107284 3:0.67096  
1.28 1:0.556531 2:0.37445 3:0.78978 4:0.181818  
1.28 1:0.320089 2:0.519256 3:0.827586 5:0.658228  
1.28 1:0.349435 2:0.166483 3:0.823432 5:0.718419  
1.28 1:0.435871 2:0.291703 3:0.814707 4:0.181818  
1.28 1:0.266904 2:0.289613 3:0.781471 5:0.715692  
1.28 1:0.369929 2:0.321853 3:0.69838  
1.28 1:0.355012 2:0.130392 3:0.704196  
1.28 1:0.373902 2:0.216879 3:0.756128 4:0.0909091  
1.28 1:0.364492 2:0.37401 3:0.722476  
1.28 1:0.358218 2:0.185299 3:0.74408 5:0.704871  
1.28 1:0.384916 2:0.431888 3:0.757374  
1.28 1:0.292625 2:0.167254 3:0.7258 5:0.593128  
1.28 1:0.313467 2:0.132923 3:0.682177

1.28 1:0.348738 2:0.176937 3:0.682177  
1.28 1:0.308867 2:0.135893 3:0.664728  
1.28 1:0.324969 2:0.385343 3:0.708766  
1.28 1:0.62324 2:0.111466 3:0.648525 5:0.453687  
1.28 1:0.231772 2:0.353213 3:0.727046 4:0.181818  
1.28 1:0.273386 2:0.287082 3:0.687162 4:0.181818  
1.28 1:0.325875 2:0.135013 3:0.832572 5:0.649158  
1.28 1:0.436637 2:0.115977 3:0.84005 4:0.0909091  
1.28 1:0.233096 2:0.198393 3:0.410469 5:0.778352  
1.071553566697981 2:0.233605 3:0.725384 4:0.0909091 5:0.734809  
1.28 1:0.358218 2:0.287852 3:0.730785  
1.28 1:0.366234 2:0.331426 3:0.71666  
1.28 1:0.339049 2:0.168574 3:0.657665 5:0.720486  
1.28 1:0.309982 2:0.210937 3:0.641047 4:0.181818 5:0.670111  
1.28 2:0.167033 3:0.733278 5:0.714228  
1.28 1:0.284539 2:0.274758 3:0.702119 4:0.0909091  
1.140543624646016 2:0.12346 3:0.754466 5:0.634174  
1.28 1:0.58769 2:0.183979 3:0.668467 5:0.737679  
1.28 1:0.341489 2:0.264965 3:0.682592 5:0.628663  
1.28 1:0.332497 2:0.112786 3:0.65725  
1.28 1:0.342744 2:0.251651 3:0.66639  
1.28 1:0.390701 2:0.222711 3:0.759452 4:0.0909091  
1.28 1:0.390422 2:0.272667 3:0.706273  
1.28 1:0.568172 2:0.170224 3:0.742418 4:0.0909091  
1.28 1:0.293601 2:0.200814 3:0.783133 5:0.589741  
1.28 1:0.377039 2:0.34485 3:0.651018 4:0.0909091  
1.28 1:0.325247 2:0.252421 3:0.774823 4:0.181818  
1.28 1:0.370487 2:0.225572 3:0.692563  
1.28 1:0.328175 2:0.226783 3:0.692979  
1.28 1:0.421372 2:0.196633 3:0.718322 4:0.181818  
1.28 1:0.496236 2:0.263424 3:0.601163 5:0.745171  
1.28 1:0.489893 2:0.262984 3:0.703781 4:0.181818  
1.28 1:0.520981 2:0.228103 3:0.726631 4:0.0909091  
1.28 1:0.332915 2:0.226342 3:0.678853  
1.28 2:0.174516 3:0.863731 5:0.706966

1.28 1:0.676007 2:0.122689 3:0.754466 5:0.623812  
1.28 1:0.285794 2:0.305018 3:0.830079 5:0.705215  
1.28 1:0.380385 2:0.28048 3:0.705858 5:0.000344442  
1.28 1:0.367071 2:0.207636 3:0.690902  
1.28 1:0.292277 2:0.207636 3:0.737432 4:0.0909091  
1.28 1:0.364074 2:0.323724 3:0.752389  
1.28 1:0.406664 2:0.199384 3:0.721645 4:0.0909091  
1.28 1:0.567824 2:0.239877 3:0.854175  
1.28 1:0.247735 2:0.261114 3:0.6801 5:0.645082  
1.28 1:0.321971 2:0.358605 3:0.633569  
1.28 1:0.663948 2:0.291813 3:0.599917 5:0.911995  
1.28 1:0.564199 2:0.201034 3:0.886165  
1.28 2:0.182108 3:0.886165 5:0.822268  
1.28 1:0.269483 2:0.364547 3:0.624013 4:0.0909091  
1.28 1:0.373414 2:0.201144 3:0.681762 5:0.716266  
1.28 1:0.278475 2:0.231734 3:0.697133 5:0.733689  
1.28 1:0.369232 2:0.228323 3:0.717906  
1.28 1:0.418374 2:0.46941 3:0.745326  
1.28 1:0.330266 2:0.106184 3:0.68924  
1.28 1:0.251917 2:0.131492 3:0.453261 5:0.704469  
1.28 1:0.336749 2:0.310519 3:0.717906  
1.28 1:0.358637 2:0.204005 3:0.704612  
1.28 1:0.30336 2:0.151078 3:0.598255 5:0.737909  
1.28 1:0.315628 2:0.462368 3:0.683839  
1.28 1:0.279381 2:0.273878 3:0.784379 4:0.0909091 5:0.668619  
1.28 1:0.383312 2:0.220621 3:0.717906  
1.28 1:0.221316 2:0.150858 3:0.743664 5:0.762651  
1.28 1:0.328593 2:0.376761 3:0.717906  
1.28 1:0.400042 2:0.299846 3:0.746572  
1.28 1:0.294995 2:0.346721 3:0.613211 4:0.0909091  
1.28 1:0.583647 2:0.116417 3:0.65725 5:0.734034  
1.28 1:0.302314 2:0.425066 3:0.717906 5:0.713166  
1.28 1:0.278405 2:0.15702 3:0.718322 5:0.616981  
1.28 1:0.391259 2:0.223922 3:0.717906  
1.28 1:0.322808 2:0.166923 3:0.717906 4:0.0909091



-42.12952807328218 1:0.586296 2:0.24879 3:0.73037 5:0.946698  
-21.7559121299142 1:0.659278 2:0.508803 3:0.491483 5:0.856454  
-6.618352580175855 1:0.474906 2:0.279159 3:0.738679 4:0.909091 5:0.846666  
-122.4271696053398 1:0.294228 2:0.268266 3:0.658081 4:0.181818 5:0.570166  
-256 1:0.34135 2:0.173415 3:0.690486  
-4.876754352784737 1:0.508922 2:0.430898 3:0.759867 4:0.181818 5:0.904504  
-167.7280949515969 1:0.73686 2:0.21721 3:0.688824 5:0.810414  
-49.38881483246659 1:0.499582 2:0.501761 3:0.643955 5:0.776544  
-53.04350492258096 1:0.690227 2:0.357835 3:0.772746 5:0.887569  
-236.1260955199875 1:0.381988 2:0.359705 3:0.74408 5:0.755418  
-21.8581826702204 1:0.263906 2:0.229643 3:0.761113 4:0.181818 5:0.866644  
-32.19502156171714 1:0.732748 2:0.630062 3:0.751143 5:0.852608  
-147.6442501915737 1:0.264812 2:0.101232 3:0.749065 5:0.67944  
-230.596656252856 1:0.282448 2:0.185629 3:0.780224 5:0.712334  
-123.8000675016351 1:0.362749 2:0.15724 3:0.596178 5:0.76931  
-256 1:0.28433 2:0.226452 3:0.644371 5:0.652631  
-24.73309172132454 1:0.284957 2:0.240537 3:0.439551 5:0.79411  
-133.1828484260985 1:0.807263 2:0.275638 3:0.714167 5:0.725681  
-220.2946492701279 1:0.53555 2:0.196193 3:0.484836 5:0.737679  
-231.1186501308061 1:0.671964 2:0.134683 3:0.682177 5:0.617555  
-256 1:0.382197 2:0.37478 3:0.713336 4:0.0909091  
-197.3574775241379 1:0.566081 2:0.192782 3:0.84005 4:0.0909091

## \* OvCa prediction model

svm\_type c\_svc

kernel\_type rbf

gamma 2

nr\_class 2

total\_sv 1727

rho -11.8864

label -1 1

probA -0.351959

probB -4.42648

nr\_sv 1706 21

SV

51.2 1:0.293668 2:0.186623 3:0.533784 5:0.778409

51.2 1:0.611524 2:0.38264 3:0.517455 4:0.00347222 5:0.840036

51.2 1:0.345659 2:0.237976 3:0.644144 4:0.0104167 5:0.809524

51.2 1:0.640717 2:0.476578 3:0.670608 4:0.00347222 5:0.762795

51.2 1:0.283381 2:0.283191 3:0.709459 5:0.762192

51.2 1:0.561132 2:0.271668 3:0.66723 4:0.0138889 5:0.663481

51.2 1:0.586154 2:0.192009 3:0.653716 4:0.00347222 5:0.750337

51.2 1:0.594008 2:0.194013 3:0.615428 4:0.00694444 5:0.717788

51.2 1:0.492945 2:0.108216 3:0.714527 4:0.00694444 5:0.779012

51.2 1:0.310419 2:0.212675 3:0.510698 4:0.00347222

51.2 1:0.711267 2:0.282565 3:0.649212 5:0.748759

51.2 1:0.471189 2:0.261523 3:0.63795 4:0.00347222 5:0.827234

51.2 1:0.612567 2:0.295842 3:0.581644 4:0.00347222 5:0.701513

51.2 1:0.59526 2:0.348447 3:0.511261 5:0.796779

51.2 1:0.551818 2:0.381137 3:0.611486 4:0.0138889 5:0.752978

51.2 1:0.361646 2:0.176603 3:0.49268

51.2 1:0.270731 2:0.193136 3:0.475225 4:0.00694444

51.2 1:0.271982 2:0.1999 3:0.583333 5:0.765808

51.2 1:0.298533 2:0.255636 3:0.623311 4:0.00347222 5:0.704469

51.2 1:0.346354 2:0.169088 3:0.496059 4:0.00694444

51.2 1:0.606867 2:0.231713 3:0.561937 4:0.00694444 5:0.755475

51.2 1:0.280462 2:0.209294 3:0.581081 4:0.0173611 5:0.694767

51.2 1:0.27087 2:0.241984 3:0.411599 4:0.0138889

51.2 1:0.824286 2:0.423221 3:0.475788 5:0.721519  
51.2 1:0.855703 2:0.196142 3:0.543356 5:0.721519  
51.2 1:0.809689 2:0.333667 3:0.53491 4:0.00347222 5:0.641465  
51.2 1:0.775561 2:0.217811 3:0.509572 5:0.844427  
51.2 1:0.737471 2:0.271042 3:0.642455 5:0.677115  
51.2 1:0.492806 2:0.354709 3:0.594595 5:0.715176  
51.2 1:0.753458 2:0.242735 3:0.649212 5:0.748185  
51.2 1:0.404115 2:0.430611 3:0.616554 4:0.0243056 5:0.692729  
51.2 1:0.292 2:0.169589 3:0.454955  
51.2 1:0.357754 2:0.26265 3:0.663851 5:0.713195  
51.2 1:0.486481 2:0.216182 3:0.603604 5:0.723126  
51.2 1:0.418781 2:0.268161 3:0.601351 4:0.00347222 5:0.728724  
6.178751694431945 1:0.338639 2:0.202405 3:0.713401 4:1 5:0.710526  
51.2 1:0.914298 2:0.210922 3:0.568694 5:0.831396  
51.2 1:0.62911 2:0.49499 3:0.600225 5:0.826143  
51.2 1:0.405018 2:0.234093 3:0.61768 5:0.687477  
51.2 1:0.340516 2:0.065005 3:0.627252 4:0.00694444 5:0.707167  
51.2 2:0.217059 3:0.668919 5:0.814977  
51.2 1:0.691597 2:0.294464 3:0.61205 5:0.761187  
51.2 1:0.75311 2:0.359719 3:0.58277 4:0.00347222 5:0.825167  
51.2 1:0.506777 2:0.0941884 3:0.623874 4:0.00694444 5:0.769138  
51.2 1:0.367067 2:0.213928 3:0.627252 4:0.00347222 5:0.717443  
51.2 1:0.360395 2:0.183742 3:0.641892 5:0.706679  
51.2 1:0.334399 2:0.193512 3:0.406532  
51.2 1:0.298394 2:0.359594 3:0.57714 4:0.00694444 5:0.777606  
51.2 1:0.636825 2:0.361097 3:0.720721 5:0.739286  
51.2 1:0.602419 2:0.468813 3:0.481982 5:0.836046  
51.2 1:0.50205 2:0.450025 3:0.428491 5:0.873102  
51.2 2:0.400426 3:0.484797  
51.2 1:0.813721 2:0.335045 3:0.746059 5:0.810557  
51.2 1:0.566692 2:0.312625 3:0.612613 5:0.764833  
51.2 1:0.814763 2:0.291583 3:0.603604 5:0.799506  
51.2 1:0.812122 2:0.306112 3:0.744369 4:0.00347222 5:0.804242  
51.2 1:0.61924 2:0.216057 3:0.685248 5:0.784093  
51.2 1:0.327865 2:0.0884269 3:0.532658 5:0.790953

51.2 1:0.733092 2:0.299223 3:0.710023 5:0.716037  
51.2 1:0.312782 2:0.234719 3:0.603041 4:0.00347222 5:0.732225  
51.2 1:0.384861 2:0.155311 3:0.588964 4:0.0173611 5:0.694624  
51.2 1:0.421144 2:0.280686 3:0.551239 4:0.0104167 5:0.667643  
51.2 1:0.364913 2:0.284068 3:0.63795 4:0.0138889 5:0.674876  
51.2 1:0.309446 2:0.352204 3:0.60473 4:0.0173611 5:0.69471  
51.2 1:0.300619 2:0.258392 3:0.555743 4:0.0173611 5:0.756882  
51.2 2:0.439629 3:0.588964  
51.2 1:0.451588 2:0.227079 3:0.57545 5:0.726743  
51.2 1:0.66574 2:0.285947 3:0.654842 4:0.00347222 5:0.760958  
51.2 1:0.276708 2:0.192635 3:0.625563 4:0.00347222 5:0.797641  
51.2 1:0.407034 2:0.136523 3:0.505068 4:0.00694444 5:0.870232  
51.2 1:0.274484 2:0.207164 3:0.566441 5:0.778208  
51.2 1:0.70105 2:0.178231 3:0.606982 4:0.0104167 5:0.769368  
51.2 1:0.282269 2:0.203156 3:0.504505  
51.2 1:0.346771 2:0.147545 3:0.753378  
51.2 1:0.281643 2:0.248121 3:0.507883 4:0.00694444 5:0.765895  
51.2 1:0.660805 2:0.208292 3:0.617117 4:0.00347222 5:0.725164  
51.2 1:0.856468 2:0.247119 3:0.561937 5:0.767875  
51.2 1:0.401404 2:0.226954 3:0.677365 5:0.705933  
51.2 1:0.335233 2:0.183367 3:0.672297 4:0.00694444 5:0.699475  
51.2 1:0.539306 2:0.312249 3:0.779279  
51.2 1:0.817196 2:0.44489 3:0.584459 4:0.00694444 5:0.776572  
51.2 1:0.459026 2:0.383517 3:0.58277 5:0.7361  
51.2 1:0.552096 2:0.272921 3:0.684122 5:0.736617  
51.2 2:0.447144 3:0.442005  
51.2 1:0.318969 2:0.187375 3:0.598536 5:0.773989  
51.2 1:0.437617 2:0.256513 3:0.642455 5:0.727891  
51.2 1:0.408494 2:0.154684 3:0.642455 4:0.00694444 5:0.683544  
51.2 1:0.357962 2:0.172971 3:0.498311 4:0.0104167 5:0.730762  
51.2 1:0.287551 2:0.181989 3:0.426802 4:0.00347222  
51.2 1:0.519914 2:0.219063 3:0.613739 4:0.00694444 5:0.782973  
51.2 1:0.572114 2:0.294213 3:0.533221 4:0.00347222 5:0.74319  
51.2 1:0.540001 2:0.358467 3:0.611486 5:0.74385  
51.2 1:0.529297 2:0.204659 3:0.642455 4:0.00347222 5:0.72238

51.2 1:0.43164 2:0.116733 3:0.470721 4:0.00347222 5:0.805735  
51.2 1:0.477375 2:0.173722 3:0.561937 5:0.774793  
51.2 1:0.725725 2:0.190757 3:0.58277 4:0.0138889 5:0.838514  
51.2 1:0.356641 2:0.191508 3:0.673986 5:0.753466  
51.2 1:0.553764 2:0.338176 3:0.63232 5:0.810184  
51.2 1:0.422673 2:0.516157 3:0.481419 4:0.00347222 5:0.75625  
51.2 1:0.508028 2:0.205035 3:0.610923 5:0.837137  
51.2 1:0.481407 2:0.27743 3:0.558559 4:0.00347222 5:0.806194  
51.2 1:0.565441 2:0.260396 3:0.754505 4:0.00347222  
51.2 1:0.677417 2:0.565381 3:0.32545 4:0.00347222 5:0.817245  
51.2 1:0.722527 2:0.31488 3:0.568131 5:0.880766  
51.2 1:0.285536 2:0.198647 3:0.651464 4:0.00347222 5:0.742185  
51.2 1:0.27782 2:0.281438 3:0.554054 5:0.740463  
51.2 1:0.401196 2:0.225576 3:0.588401 4:0.00347222 5:0.68719  
51.2 1:0.287482 2:0.186247 3:0.67286 5:0.719079  
51.2 1:0.266908 2:0.219188 3:0.612613 5:0.72792  
51.2 1:0.632793 2:0.290957 3:0.616554 4:0.00694444 5:0.777232  
51.2 1:0.899354 2:0.538577 3:0.614302 5:0.885215  
51.2 2:0.373873 3:0.619369  
51.2 1:0.798568 2:0.453031 3:0.655405 4:0.00694444 5:0.860214  
51.2 1:0.796622 2:0.208793 3:0.51464 5:0.811074  
51.2 1:0.643289 2:0.280311 3:0.619369 5:0.740262  
51.2 1:0.519358 2:0.323397 3:0.746622 4:0.00694444  
51.2 1:0.303468 2:0.177104 3:0.487613 4:0.00347222  
51.2 1:0.351428 2:0.225326 3:0.689752 4:0.00694444 5:0.681793  
51.2 1:0.262459 2:0.216934 3:0.515766  
51.2 1:0.331271 2:0.221693 3:0.503941  
51.2 1:0.476611 2:0.249123 3:0.635135 5:0.809696  
51.2 1:0.418155 2:0.221568 3:0.574887 5:0.725337  
51.2 1:0.255717 2:0.207415 3:0.466779  
51.2 1:0.5049 2:0.129509 3:0.524775 5:0.792847  
51.2 1:0.349691 2:0.143537 3:0.720158  
51.2 1:0.407729 2:0.316383 3:0.663288 4:0.00694444 5:0.714257  
51.2 1:0.293181 2:0.196142 3:0.476914  
51.2 1:0.320984 2:0.216308 3:0.476914

51.2 1:0.263641 2:0.251002 3:0.389077  
51.2 1:0.482866 2:0.349073 3:0.543356 4:0.00694444 5:0.796263  
51.2 2:0.413076 3:0.389077  
51.2 1:0.389101 2:0.156814 3:0.627815  
51.2 1:0.268506 2:0.170215 3:0.685811 4:0.00347222 5:0.778639  
51.2 1:0.445333 2:0.155311 3:0.630068 4:0.00347222 5:0.761503  
51.2 1:0.645305 2:0.250626 3:0.666667 5:0.783662  
51.2 1:0.295892 2:0.197645 3:0.509009 4:0.00694444  
51.2 1:0.283798 2:0.176603 3:0.753941 4:0.00347222 5:0.729814  
51.2 1:0.416209 2:0.29772 3:0.646396 5:0.722323  
51.2 1:0.7292 2:0.220817 3:0.617117 5:0.834754  
51.2 1:0.515118 2:0.201027 3:0.572072 4:0.0104167 5:0.767416  
51.2 1:0.664558 2:0.245867 3:0.497748 4:0.0138889 5:0.739832  
51.2 1:0.325294 2:0.241483 3:0.388514  
51.2 1:0.603044 2:0.339178 3:0.697072 5:0.826057  
51.2 1:0.305206 2:0.223071 3:0.701014 4:0.00694444 5:0.702546  
51.2 1:0.669771 2:0.284694 3:0.47973 5:0.870605  
51.2 2:0.196268 3:0.496059 5:0.864204  
51.2 2:0.175726 3:0.568131 5:0.87072  
51.2 1:0.456315 2:0.205286 3:0.602477 4:0.00694444 5:0.84592  
51.2 1:0.820463 2:0.254634 3:0.495495 5:0.773386  
51.2 1:0.347744 2:0.171468 3:0.626689 5:0.728953  
51.2 1:0.271843 2:0.205536 3:0.476914  
51.2 1:0.547578 2:0.206413 3:0.579392 4:0.0104167 5:0.782456  
51.2 1:0.278654 2:0.312751 3:0.606982 4:0.00694444 5:0.745515  
51.2 1:0.32585 2:0.349699 3:0.619932 4:0.00694444 5:0.709291  
51.2 1:0.295197 2:0.309118 3:0.619369 5:0.770975  
51.2 1:0.719608 2:0.254634 3:0.694257 4:0.00694444 5:0.81159  
51.2 1:0.79683 2:0.213051 3:0.628378 4:0.00347222 5:0.697552  
51.2 1:0.282199 2:0.290706 3:0.615991 4:0.00347222 5:0.720945  
51.2 1:0.33002 2:0.153557 3:0.493243  
51.2 1:0.54723 2:0.211047 3:0.52027 5:0.87537  
51.2 1:0.396191 2:0.151303 3:0.671171  
51.2 1:0.489122 2:0.148547 3:0.569257 4:0.0138889 5:0.783834  
51.2 1:0.432682 2:0.278432 3:0.521959 4:0.0138889 5:0.690261

51.2 1:0.491207 2:0.216683 3:0.650338 4:0.00347222 5:0.755188  
51.2 1:0.322027 2:0.181488 3:0.704392 4:0.0104167 5:0.679612  
51.2 1:0.424411 2:0.127505 3:0.670045 4:0.00347222  
51.2 1:0.708904 2:0.229334 3:0.613739 4:0.00694444 5:0.775281  
51.2 1:0.281782 2:0.263402 3:0.684122 4:0.00347222 5:0.786705  
51.2 1:0.522903 2:0.341809 3:0.684122 5:0.759522  
51.2 1:0.521165 2:0.316007 3:0.684122 4:0.00347222 5:0.760498  
51.2 1:0.50073 2:0.203407 3:0.684122 5:0.800827  
51.2 1:0.593661 2:0.206162 3:0.684122 5:0.780447  
51.2 1:0.368319 2:0.158567 3:0.684122 5:0.780246  
51.2 1:0.411483 2:0.120491 3:0.662162 4:0.00347222 5:0.729527  
51.2 1:0.360395 2:0.110095 3:0.662162  
51.2 1:0.391047 2:0.228707 3:0.653716 4:0.00347222 5:0.764833  
51.2 1:0.35831 2:0.204158 3:0.659347 5:0.761388  
51.2 1:0.366928 2:0.162325 3:0.659347 5:0.702345  
51.2 1:0.317787 2:0.170842 3:0.659347 4:0.0104167 5:0.744654  
51.2 1:0.264058 2:0.177355 3:0.477477  
51.2 1:0.638771 2:0.21994 3:0.593468 4:0.00347222 5:0.736301  
51.2 1:0.353236 2:0.266032 3:0.54955 5:0.761446  
51.2 1:0.48231 2:0.362475 3:0.591216 5:0.779902  
51.2 1:0.362967 2:0.27743 3:0.611486 4:0.0104167 5:0.74319  
40.07304425226898 2:0.46731 3:0.598536 5:0.881369  
51.2 1:0.421005 2:0.233091 3:0.666104  
51.2 1:0.68694 2:0.217435 3:0.670608 4:0.00347222 5:0.754413  
51.2 1:0.564051 2:0.324524 3:0.554054 5:0.705675  
51.2 1:0.252381 2:0.211172 3:0.429054  
51.2 1:0.272746 2:0.277305 3:0.428491  
51.2 1:0.304302 2:0.207164 3:0.428491  
51.2 1:0.480364 2:0.15769 3:0.608671 5:0.740348  
51.2 1:0.512338 2:0.21493 3:0.567568 5:0.721261  
51.2 1:0.295962 2:0.180987 3:0.538851  
51.2 1:0.32154 2:0.262149 3:0.601351 5:0.795861  
51.2 1:0.49218 2:0.187625 3:0.494369 5:0.823301  
51.2 1:0.576562 2:0.341433 3:0.696509 4:0.00694444 5:0.784322  
51.2 1:0.333078 2:0.236723 3:0.666667 4:0.00694444 5:0.742702

51.2 1:0.350177 2:0.179609 3:0.675113 4:0.0138889 5:0.770717  
51.2 1:0.271773 2:0.116358 3:0.645833 4:0.00347222 5:0.754987  
51.2 1:0.350177 2:0.187751 3:0.658221 4:0.0104167 5:0.724016  
51.2 1:0.362271 2:0.295341 3:0.625 5:0.78039  
51.2 1:0.302912 2:0.265155 3:0.63232 4:0.00694444 5:0.746979  
51.2 1:0.370751 2:0.209043 3:0.585586 5:0.801946  
51.2 1:0.417808 2:0.304484 3:0.638514 5:0.701627  
51.2 1:0.349969 2:0.162575 3:0.633446 4:0.00347222  
51.2 1:0.340307 2:0.0846693 3:0.498311 4:0.0138889 5:0.829243  
51.2 1:0.650031 2:0.162575 3:0.618243 4:0.0173611 5:0.71087  
51.2 1:0.331966 2:0.171969 3:0.533221 4:0.00347222  
41.10366867152565 1:0.399666 2:0.163327 3:0.603604 4:0.00347222 5:0.689773  
51.2 1:0.59665 2:0.228833 3:0.576014 5:0.821895  
51.2 1:0.77146 2:0.208667 3:0.660473 5:0.76578  
51.2 1:0.366789 2:0.36523 3:0.539977 4:0.00347222 5:0.752949  
51.2 1:0.507124 2:0.300601 3:0.519144 4:0.00347222 5:0.749734  
51.2 1:0.568916 2:0.267034 3:0.563063 4:0.00347222 5:0.775338  
51.2 1:0.565858 2:0.314504 3:0.496059 5:0.811275  
51.2 1:0.268854 2:0.0963176 3:0.411036 4:0.00694444 5:0.835041  
51.2 1:0.738514 2:0.334419 3:0.681869 5:0.865323  
51.2 1:0.435393 2:0.199023 3:0.538288 4:0.0104167 5:0.778581  
21.81877004051758 1:0.427678 2:0.328908 3:0.295608 4:0.00347222 5:0.878125  
51.2 1:0.294015 2:0.301102 3:0.5625 5:0.843193  
51.2 1:0.770765 2:0.304359 3:0.600225 5:0.65131  
51.2 1:0.546744 2:0.197019 3:0.521396 4:0.00347222 5:0.843853  
51.2 2:0.373622 3:0.560811  
51.2 1:0.397929 2:0.281438 3:0.730856 4:0.00347222 5:0.817647  
51.2 1:0.71926 2:0.500125 3:0.473536 5:0.870002  
51.2 1:0.406061 2:0.139279 3:0.642455 5:0.74807  
51.2 1:0.254605 2:0.206663 3:0.65259 5:0.760326  
51.2 1:0.447001 2:0.411072 3:0.620495 5:0.808806  
51.2 1:0.488219 2:0.373873 3:0.609234 4:0.00347222 5:0.767129  
51.2 1:0.492458 2:0.121743 3:0.668919 4:0.0138889 5:0.853899  
51.2 1:0.629318 2:0.210296 3:0.615428 4:0.00347222 5:0.752146  
51.2 1:0.483701 2:0.30774 3:0.559122 4:0.00347222 5:0.73036



51.2 1:0.282269 2:0.175225 3:0.588964 5:0.732512  
51.2 1:0.517759 2:0.186498 3:0.483671 4:0.00347222 5:0.832458  
51.2 1:0.422465 2:0.330661 3:0.695946 5:0.777979  
51.2 1:0.274692 2:0.236348 3:0.593468 4:0.00694444 5:0.782198  
51.2 1:0.260374 2:0.223572 3:0.593468 5:0.734149  
10.79280122152117 1:0.255995 2:0.21994 3:0.413288 4:0.0381944 5:0.731651  
51.2 1:0.288038 2:0.204284 3:0.634009 4:0.00694444 5:0.693332  
51.2 1:0.349969 2:0.206037 3:0.714527 4:0.00347222 5:0.839174  
51.2 1:0.278585 2:0.209669 3:0.664414 5:0.796091  
51.2 1:0.623966 2:0.262024 3:0.605856 4:0.00694444 5:0.793938  
51.2 1:0.408355 2:0.30273 3:0.665541 4:0.0138889 5:0.657166  
51.2 1:0.361229 2:0.163327 3:0.432432  
51.2 1:0.556961 2:0.117861 3:0.64527 4:0.00347222 5:0.842734  
51.2 1:0.27365 2:0.24261 3:0.315315  
51.2 1:0.325085 2:0.290832 3:0.480856 4:0.00694444 5:0.752691  
51.2 1:0.295267 2:0.281688 3:0.603041 4:0.0104167 5:0.78659  
51.2 1:0.312087 2:0.189128 3:0.639077 5:0.760584  
51.2 1:0.461875 2:0.204785 3:0.706081 5:0.741152  
51.2 1:0.281713 2:0.278181 3:0.654279 5:0.764632  
51.2 1:0.728574 2:0.228332 3:0.640203 5:0.815322  
51.2 1:0.415862 2:0.176478 3:0.601914 5:0.73788  
51.2 1:0.467644 2:0.255511 3:0.541667 4:0.0104167 5:0.785097  
51.2 1:0.526656 2:0.265406 3:0.59009 5:0.816384  
51.2 1:0.535066 2:0.392034 3:0.636824 5:0.799047  
51.2 1:0.349065 2:0.139529 3:0.592342 4:0.00347222 5:0.730561  
51.2 1:0.427191 2:0.180736 3:0.613739 4:0.00347222 5:0.72614  
51.2 1:0.557517 2:0.288452 3:0.568694 4:0.00347222 5:0.719797  
51.2 1:0.501911 2:0.298221 3:0.588964 5:0.716266  
51.2 1:0.787238 2:0.45253 3:0.583333 5:0.704785  
51.2 1:0.291861 2:0.193512 3:0.429054 4:0.00347222 5:0.000430552  
51.2 1:0.349691 2:0.125125 3:0.607545 4:0.00347222 5:0.79434  
51.2 1:0.743449 2:0.428983 3:0.649775 5:0.899653  
51.2 1:0.589699 2:0.313627 3:0.677365 5:0.827004  
51.2 1:0.754779 2:0.385145 3:0.704955 5:0.848532  
51.2 1:0.515535 2:0.124499 3:0.548423 4:0.00347222 5:0.771865

51.2 2:0.357841 3:0.646396  
51.2 1:0.443456 2:0.34494 3:0.435248 4:0.0104167 5:0.756738  
51.2 1:0.560715 2:0.321518 3:0.552928 4:0.00347222 5:0.755303  
51.2 1:0.38639 2:0.308116 3:0.572072 5:0.837625  
51.2 1:0.482171 2:0.358091 3:0.558559 4:0.00347222 5:0.681535  
51.2 1:0.508445 2:0.198021 3:0.768581 4:0.00347222  
51.2 1:0.436019 2:0.173722 3:0.724099  
51.2 1:0.708973 2:0.322896 3:0.631757 4:0.00347222 5:0.886219  
51.2 1:0.455898 2:0.320391 3:0.625 5:0.749361  
51.2 1:0.682978 2:0.32728 3:0.560248 5:0.884296  
51.2 1:0.750678 2:0.522044 3:0.440878 5:0.87824  
51.2 1:0.632446 2:0.4375 3:0.462838 5:0.860042  
51.2 1:0.81803 2:0.284444 3:0.647523 5:0.87336  
51.2 1:0.734691 2:0.467059 3:0.746059 5:0.900399  
51.2 1:0.68826 2:0.325276 3:0.554054 5:0.857947  
51.2 1:0.746577 2:0.473948 3:0.684685 5:0.851  
51.2 1:0.546605 2:0.141157 3:0.490428 5:0.860731  
51.2 1:0.766317 2:0.183492 3:0.650901 5:0.857344  
51.2 1:0.283311 2:0.178357 3:0.623311 4:0.00694444 5:0.797239  
51.2 1:0.302287 2:0.114103 3:0.541104 5:0.771836  
51.2 1:0.267464 2:0.293211 3:0.685811 4:0.00347222 5:0.729699  
51.2 1:0.745882 2:0.426478 3:0.727477 4:0.00347222 5:0.730388  
51.2 1:0.662821 2:0.364354 3:0.658784 4:0.00347222 5:0.879819  
51.2 1:0.230486 2:0.169339 3:0.584459 4:0.0347222 5:0.670943  
51.2 1:0.672413 2:0.49524 3:0.523649 4:0.0104167 5:0.797267  
51.2 1:0.55578 2:0.400927 3:0.613176 4:0.00694444 5:0.69072  
51.2 1:0.599361 2:0.396919 3:0.525338 4:0.00347222 5:0.70269  
51.2 1:0.655314 2:0.363853 3:0.629505 5:0.717242  
51.2 1:0.619726 2:0.227831 3:0.53491 4:0.00347222 5:0.843136  
51.2 1:0.503441 2:0.374248 3:0.621059 5:0.751084  
51.2 1:0.383541 2:0.136147 3:0.597973 5:0.779816  
51.2 1:0.696254 2:0.347069 3:0.684122 4:0.00347222 5:0.797382  
51.2 1:0.786613 2:0.281814 3:0.461149 4:0.00347222 5:0.872212  
51.2 1:0.363106 2:0.231839 3:0.570946 4:0.00347222 5:0.738511  
51.2 1:0.553277 2:0.356087 3:0.622185 5:0.715405

51.2 1:0.330437 2:0.303732 3:0.660473 5:0.777204  
51.2 1:0.312435 2:0.258768 3:0.591216 4:0.0104167 5:0.734321  
51.2 1:0.308612 2:0.365982 3:0.640766 4:0.0138889 5:0.703235  
51.2 1:0.371794 2:0.151804 3:0.671734 4:0.00347222 5:0.773013  
51.2 1:0.56412 2:0.210296 3:0.71509 5:0.810586  
51.2 1:0.635087 2:0.250251 3:0.682432 4:0.00347222 5:0.785413  
51.2 1:0.651282 2:0.20754 3:0.573198 5:0.783289  
51.2 1:0.582887 2:0.272044 3:0.664414 4:0.00347222 5:0.704096  
51.2 1:0.820671 2:0.421092 3:0.690315 4:0.00694444 5:0.791355  
51.2 1:0.504414 2:0.181363 3:0.5625 4:0.00347222 5:0.847298  
51.2 1:0.52186 2:0.162951 3:0.697072  
51.2 1:0.368458 2:0.176102 3:0.723536 4:0.00694444 5:0.781481  
51.2 1:0.311531 2:0.0827906 3:0.747748 4:0.0138889 5:0.785442  
51.2 1:0.559602 2:0.270165 3:0.631757 4:0.00694444 5:0.666006  
51.2 1:0.67846 2:0.233216 3:0.609797 4:0.0173611 5:0.71862  
51.2 1:0.57267 2:0.2877 3:0.65259 5:0.697953  
51.2 1:0.258984 2:0.157565 3:0.568694 5:0.797928  
14.6554496205806 2:0.709544 3:0.441441 5:0.822957  
51.2 1:0.943769 2:0.433617 3:0.650901 5:0.878412  
51.2 1:0.512059 2:0.245867 3:0.724662 5:0.755418  
51.2 1:0.868701 2:0.437751 3:0.690315 4:0.00694444 5:0.754413  
51.2 1:0.439355 2:0.1875 3:0.588964 5:0.802004  
51.2 2:0.396042 3:0.614865 5:0.890238  
51.2 1:0.973726 2:0.387149 3:0.798986 5:0.857746  
51.2 2:0.495867 3:0.504505  
51.2 1:0.314451 2:0.233592 3:0.546734 5:0.799506  
51.2 1:0.589491 2:0.353958 3:0.659347 4:0.00694444 5:0.727805  
51.2 1:0.440189 2:0.159193 3:0.61036 4:0.0138889 5:0.707339  
51.2 1:0.547647 2:0.276929 3:0.600788 4:0.00694444 5:0.718534  
51.2 1:0.57962 2:0.101077 3:0.59741 4:0.00347222 5:0.821866  
51.2 1:0.449155 2:0.334419 3:0.539977 5:0.797612  
51.2 1:0.331688 2:0.302605 3:0.631757 4:0.0277778 5:0.694767  
51.2 1:0.778203 2:0.257891 3:0.681869 4:0.00347222 5:0.760929  
51.2 1:0.259053 2:0.21731 3:0.502815 5:0.78969  
51.2 1:0.571975 2:0.168838 3:0.580518 4:0.0138889 5:0.719825

51.2 1:0.503302 2:0.222445 3:0.70045  
51.2 1:0.804963 2:0.606964 3:0.679054 5:0.899222  
51.2 1:0.749357 2:0.191132 3:0.610923 5:0.877924  
51.2 1:0.734135 2:0.309118 3:0.713964 5:0.908005  
51.2 1:0.575728 2:0.223071 3:0.566441 4:0.00347222 5:0.700795  
51.2 1:0.679016 2:0.320015 3:0.746622 4:0.0104167 5:0.885186  
51.2 1:0.495517 2:0.192134 3:0.68018 4:0.00347222  
51.2 1:0.397303 2:0.225451 3:0.739865 4:0.00347222  
51.2 1:0.422534 2:0.238978 3:0.761824  
51.2 1:0.37805 2:0.300601 3:0.642455 4:0.0104167 5:0.73788  
51.2 1:0.476333 2:0.213677 3:0.603604 4:0.00347222 5:0.734436  
51.2 1:0.304511 2:0.223572 3:0.653153 5:0.715118  
51.2 1:0.337318 2:0.164203 3:0.618806 4:0.00694444 5:0.684004  
51.2 1:0.466602 2:0.269664 3:0.574324 4:0.00694444 5:0.706909  
51.2 1:0.302426 2:0.234218 3:0.48705  
51.2 1:0.31459 2:0.215681 3:0.579392 4:0.00347222 5:0.767732  
51.2 1:0.337249 2:0.187625 3:0.616554 4:0.00694444 5:0.751715  
51.2 1:0.742198 2:0.259018 3:0.678491 4:0.00694444 5:0.722868  
51.2 1:0.686314 2:0.331413 3:0.722973 4:0.00347222 5:0.713568  
51.2 1:0.771599 2:0.281688 3:0.548423 5:0.802692  
51.2 1:0.642872 2:0.485972 3:0.630631 5:0.789776  
51.2 1:0.367415 2:0.289078 3:0.486486 5:0.768047  
51.2 1:0.589351 2:0.549474 3:0.472973 5:0.789776  
51.2 1:0.505734 2:0.210421 3:0.559685 5:0.76644  
51.2 1:0.678599 2:0.634644 3:0.579392 5:0.928327  
51.2 1:0.848752 2:0.259519 3:0.63964 4:0.00347222 5:0.931686  
51.2 1:0.868284 2:0.243236 3:0.654279 5:0.909412  
51.2 1:0.708417 2:0.138778 3:0.605293 5:0.881713  
51.2 1:0.704942 2:0.782189 3:0.545608 5:0.90149  
51.2 1:0.861125 2:0.46756 3:0.513514 4:0.00347222 5:0.91455  
51.2 1:0.838257 2:0.335797 3:0.598536 5:0.879646  
51.2 2:0.456538 3:0.47241 4:0.00347222  
51.2 1:0.692431 2:0.473071 3:0.581081 4:0.0138889 5:0.777979  
51.2 1:0.289428 2:0.107841 3:0.695946 4:0.0173611 5:0.754356  
51.2 1:0.505734 2:0.190256 3:0.658784 5:0.820804

28.76467868748425 1:0.327726 2:0.264404 3:0.462838 5:0.780993  
51.2 1:0.351776 2:0.186373 3:0.613176 4:0.0104167 5:0.732627  
51.2 1:0.479322 2:0.232966 3:0.556869 4:0.0208333 5:0.737794  
51.2 1:0.308681 2:0.413327 3:0.612613 5:0.830219  
51.2 1:0.335442 2:0.198522 3:0.510698  
51.2 1:0.326684 2:0.131889 3:0.600225 4:0.0277778 5:0.760326  
51.2 1:0.440259 2:0.198647 3:0.483108 4:0.00347222 5:0.85344  
51.2 1:0.895114 2:0.485596 3:0.684122 5:0.735584  
51.2 1:0.356572 2:0.323021 3:0.603041 5:0.783002  
51.2 1:0.754223 2:0.333542 3:0.696509 4:0.00694444 5:0.71331  
51.2 1:0.782303 2:0.171092 3:0.639077 5:0.923505  
51.2 1:0.668451 2:0.446894 3:0.580518 5:0.777261  
51.2 1:0.399319 2:0.374499 3:0.57545 5:0.81093  
51.2 1:0.480295 2:0.344314 3:0.621622 4:0.00694444 5:0.708717  
51.2 1:0.500104 2:0.274674 3:0.650338 4:0.00694444 5:0.81515  
51.2 1:0.492806 2:0.319264 3:0.481982 5:0.773357  
51.2 1:0.698061 2:0.349825 3:0.677365 4:0.0104167 5:0.75493  
51.2 1:0.468478 2:0.343938 3:0.551802 4:0.00694444 5:0.753782  
51.2 1:0.269271 2:0.138778 3:0.628378 5:0.730187  
51.2 1:0.422812 2:0.229459 3:0.634009 4:0.00347222 5:0.710411  
51.2 1:0.466046 2:0.248622 3:0.539414 5:0.80585  
51.2 1:0.490095 2:0.313502 3:0.778153 4:0.00694444  
51.2 1:0.432404 2:0.515782 3:0.51464 5:0.772726  
51.2 1:0.772503 2:0.289329 3:0.666104 5:0.805103  
51.2 1:0.389935 2:0.145792 3:0.667793 4:0.00347222  
51.2 1:0.516508 2:0.145917 3:0.560248 4:0.0104167 5:0.745486  
51.2 1:0.587266 2:0.224825 3:0.670608 4:0.00347222 5:0.716467  
51.2 1:0.576632 2:0.264153 3:0.69482 4:0.00694444 5:0.71552  
51.2 1:0.680128 2:0.266283 3:0.591779 4:0.00347222 5:0.698269  
51.2 1:0.857858 2:0.360721 3:0.456644 5:0.73501  
51.2 1:0.436783 2:0.226077 3:0.600788 4:0.00347222 5:0.717472  
51.2 1:0.637937 2:0.24499 3:0.64527 5:0.764804  
51.2 1:0.26941 2:0.199775 3:0.58277 5:0.761044  
51.2 1:0.514909 2:0.263277 3:0.631194 4:0.00347222 5:0.740377  
51.2 1:0.351637 2:0.170591 3:0.77027 4:0.03125 5:0.763455

51.2 1:0.521165 2:0.225451 3:0.671734 4:0.0104167 5:0.74032  
51.2 1:0.615417 2:0.1498 3:0.644144 5:0.819053  
51.2 1:0.574477 2:0.272044 3:0.559122 4:0.00347222 5:0.783117  
51.2 1:0.388198 2:0.125752 3:0.731982 4:0.00347222  
51.2 1:0.509627 2:0.0870491 3:0.728041  
51.2 1:0.660179 2:0.229459 3:0.583896 4:0.0138889 5:0.768449  
51.2 1:0.644401 2:0.323898 3:0.644707 4:0.00347222 5:0.815035  
51.2 1:0.480364 2:0.278432 3:0.508446 4:0.00347222 5:0.789317  
51.2 1:0.416765 2:0.338176 3:0.706644 4:0.00694444 5:0.775711  
51.2 1:0.283589 2:0.248747 3:0.52759 4:0.0138889 5:0.71064  
51.2 2:0.318512 3:0.588964  
51.2 1:0.716828 2:0.26766 3:0.588401 4:0.00347222 5:0.77241  
51.2 1:0.577188 2:0.187625 3:0.551239 4:0.00694444 5:0.752921  
51.2 1:0.603392 2:0.188377 3:0.548423 5:0.79632  
51.2 1:0.647946 2:0.319389 3:0.613739 5:0.712937  
51.2 1:0.773407 2:0.518161 3:0.668919 5:0.781681  
51.2 1:0.652534 2:0.282064 3:0.510698 4:0.00694444 5:0.733  
51.2 1:0.784111 2:0.457916 3:0.506757 5:0.779529  
51.2 1:0.778689 2:0.25263 3:0.639077 5:0.708889  
51.2 2:0.297094 3:0.472973 4:0.00347222 5:0.000344442  
51.2 2:0.466558 3:0.480293 4:0.0138889  
51.2 1:0.793147 2:0.493487 3:0.701014 4:0.00347222 5:0.748615  
51.2 1:0.312713 2:0.289329 3:0.582207 5:0.78903  
51.2 1:0.690206 2:0.245491 3:0.529842 4:0.0104167 5:0.706823  
51.2 1:0.58254 2:0.379133 3:0.744369 5:0.815379  
51.2 1:0.465976 2:0.338552 3:0.587838 4:0.00347222 5:0.780505  
51.2 1:0.315493 2:0.154559 3:0.477477  
51.2 2:0.382891 3:0.634572  
51.2 1:0.446653 2:0.293838 3:0.600225 4:0.00694444 5:0.754557  
51.2 1:0.422256 2:0.308868 3:0.563626 4:0.00347222 5:0.734378  
51.2 1:0.373879 2:0.208793 3:0.629505  
51.2 2:0.286824 3:0.480856  
51.2 1:0.531522 2:0.17986 3:0.701577 4:0.00347222 5:0.802204  
51.2 1:0.462918 2:0.301854 3:0.612613 5:0.749017  
51.2 1:0.332244 2:0.284569 3:0.54955 5:0.75028

51.2 1:0.777368 2:0.780311 3:0.503941 5:0.854847  
51.2 1:0.770626 2:0.421092 3:0.561374 5:0.774477  
51.2 1:0.346841 2:0.343186 3:0.592342 5:0.789604  
51.2 1:0.610204 2:0.221693 3:0.532658 4:0.0104167 5:0.893969  
51.2 1:0.319594 2:0.201779 3:0.711712 4:0.0138889 5:0.722122  
51.2 1:0.556405 2:0.328908 3:0.601914 4:0.00347222 5:0.72792  
51.2 1:0.776534 2:0.206162 3:0.609234 4:0.00347222 5:0.815839  
51.2 1:0.714534 2:0.2748 3:0.642455 5:0.718591  
51.2 1:0.584277 2:0.339805 3:0.608108 4:0.00347222 5:0.819312  
51.2 1:0.767151 2:0.258392 3:0.622185 5:0.68828  
51.2 1:0.398415 2:0.131137 3:0.572635 4:0.00347222 5:0.759781  
51.2 1:0.291374 2:0.21493 3:0.405968 4:0.00347222  
51.2 1:0.575103 2:0.604083 3:0.419482 5:0.907776  
51.2 1:0.552374 2:0.311498 3:0.594032 4:0.00694444 5:0.741267  
51.2 1:0.27226 2:0.295215 3:0.551239 4:0.00347222 5:0.85921  
51.2 1:0.2765 2:0.141658 3:0.612613 5:0.762823  
51.2 1:0.350594 2:0.15005 3:0.619369  
51.2 2:0.23522 3:0.619932 4:0.00347222 5:0.810241  
51.2 1:0.419754 2:0.15243 3:0.619369 4:0.00694444  
51.2 2:0.362976 3:0.612613 4:0.00347222  
51.2 1:0.292 2:0.140406 3:0.619369 5:0.719797  
51.2 1:0.393272 2:0.171092 3:0.619369 4:0.00694444  
51.2 1:0.443247 2:0.160195 3:0.592342 4:0.00347222 5:0.749275  
51.2 1:0.376381 2:0.183241 3:0.564189  
51.2 1:0.571002 2:0.269289 3:0.529842 5:0.724935  
51.2 1:0.469591 2:0.18487 3:0.653716  
51.2 1:0.634531 2:0.455286 3:0.516329 5:0.849278  
51.2 1:0.29763 2:0.217184 3:0.536036  
51.2 1:0.407173 2:0.182991 3:0.590653 4:0.00347222 5:0.695858  
51.2 1:0.533954 2:0.129259 3:0.577703 4:0.00694444 5:0.820689  
51.2 1:0.602141 2:0.306488 3:0.631757 5:0.896467  
51.2 1:0.44422 2:0.288828 3:0.508446 4:0.00694444 5:0.719338  
51.2 1:0.505317 2:0.187375 3:0.719595 5:0.775969  
51.2 1:0.298742 2:0.198647 3:0.664414 4:0.0138889 5:0.690663  
51.2 1:0.280809 2:0.234469 3:0.581081 4:0.0104167 5:0.725939

51.2 1:0.420519 2:0.186247 3:0.61768 4:0.00347222  
51.2 1:0.329395 2:0.230085 3:0.61205 5:0.748012  
51.2 1:0.563912 2:0.173722 3:0.539977 4:0.00694444 5:0.87491  
51.2 1:0.35546 2:0.151303 3:0.579392 5:0.729412  
51.2 1:0.568708 2:0.168086 3:0.546734 4:0.00347222 5:0.782801  
51.2 1:0.349621 2:0.376503 3:0.620495 5:0.750739  
51.2 1:0.714395 2:0.306989 3:0.613739 5:0.820201  
51.2 1:0.506916 2:0.145291 3:0.67286 4:0.00347222 5:0.766268  
51.2 1:0.737541 2:0.764028 3:0.550676 5:0.894716  
51.2 1:0.808786 2:0.638527 3:0.565878 5:0.880307  
51.2 1:0.867867 2:0.418086 3:0.754505 5:0.8198  
51.2 1:0.277125 2:0.173472 3:0.533221 4:0.00347222 5:0.753609  
51.2 1:0.446236 2:0.185245 3:0.743243  
51.2 1:0.759853 2:0.280185 3:0.539977 4:0.00347222 5:0.708315  
51.2 1:0.495934 2:0.273046 3:0.569257 4:0.00347222 5:0.771693  
51.2 1:0.511642 2:0.248622 3:0.596284 5:0.747897  
51.2 1:0.543338 2:0.458292 3:0.563626 5:0.818996  
51.2 1:0.827622 2:0.369113 3:0.673986 5:0.674933  
51.2 1:0.309377 2:0.286698 3:0.591779 4:0.00347222 5:0.730675  
51.2 1:0.523181 2:0.326779 3:0.611486 5:0.745056  
51.2 1:0.53034 2:0.263527 3:0.556306 5:0.806567  
51.2 1:0.441093 2:0.291082 3:0.611486 4:0.00347222 5:0.741066  
51.2 1:0.444429 2:0.186748 3:0.557995 4:0.00347222 5:0.707483  
51.2 1:0.378606 2:0.252004 3:0.567568 4:0.0138889 5:0.798301  
51.2 1:0.64593 2:0.36736 3:0.669482 5:0.818422  
51.2 1:0.619379 2:0.449148 3:0.648649 5:0.80849  
51.2 1:0.70661 2:0.361348 3:0.624437 4:0.00347222 5:0.834926  
51.2 1:0.75033 2:0.521418 3:0.633446 4:0.00347222 5:0.868969  
51.2 1:0.559741 2:0.340055 3:0.538288 4:0.0104167 5:0.779385  
51.2 1:0.72774 2:0.384644 3:0.654842 4:0.00347222 5:0.739373  
51.2 2:0.354083 3:0.494932 5:0.853584  
51.2 1:0.296031 2:0.236974 3:0.784347 5:0.779414  
51.2 1:0.662821 2:0.221443 3:0.675113 4:0.00694444 5:0.742272  
51.2 1:0.375686 2:0.279434 3:0.524212 4:0.00694444 5:0.74695  
51.2 1:0.288316 2:0.236598 3:0.591216 4:0.00347222 5:0.711358



51.2 1:0.278168 2:0.104459 3:0.619369 5:0.774391  
51.2 1:0.560784 2:0.222695 3:0.624437 4:0.00694444 5:0.795172  
51.2 1:0.563078 2:0.24499 3:0.683559 5:0.790206  
51.2 1:0.387711 2:0.372119 3:0.577703 4:0.00347222 5:0.772611  
51.2 1:0.543129 2:0.230336 3:0.559122 4:0.00347222 5:0.720945  
51.2 1:0.26093 2:0.203031 3:0.588964 5:0.727174  
51.2 1:0.351776 2:0.111598 3:0.588964 5:0.745113  
51.2 1:0.585459 2:0.346067 3:0.673986 4:0.00347222 5:0.890898  
51.2 1:0.62487 2:0.277931 3:0.604167 5:0.786532  
51.2 1:0.274553 2:0.237099 3:0.510698 4:0.00347222  
18.55324415245178 1:0.597067 2:0.367986 3:0.736486 4:0.00694444 5:0.731049  
51.2 1:0.672065 2:0.268036 3:0.579955 4:0.00347222 5:0.722954  
51.2 1:0.301453 2:0.246869 3:0.411599 4:0.00347222  
51.2 1:0.289497 2:0.20516 3:0.613176 4:0.00694444 5:0.747697  
51.2 1:0.292486 2:0.357715 3:0.657095 5:0.770085  
51.2 1:0.62626 2:0.258016 3:0.61768 4:0.00347222 5:0.729125  
51.2 2:0.317385 3:0.482545  
51.2 1:0.736707 2:0.250376 3:0.601351 4:0.00347222 5:0.769626  
51.2 1:0.280392 2:0.296969 3:0.613739 4:0.0208333 5:0.717587  
51.2 1:0.678529 2:0.2123 3:0.783221 4:0.00347222  
51.2 1:0.612984 2:0.44226 3:0.653716 5:0.822211  
51.2 1:0.485091 2:0.189128 3:0.6875 5:0.778151  
51.2 1:0.438173 2:0.429609 3:0.61036 4:0.00347222 5:0.749505  
51.2 1:0.747828 2:0.450526 3:0.665541 4:0.00694444 5:0.787393  
51.2 1:0.302287 2:0.199649 3:0.65991 5:0.783719  
51.2 1:0.44429 2:0.22758 3:0.706644 4:0.0104167  
51.2 1:0.256134 2:0.182615 3:0.544482 4:0.00694444 5:0.778294  
51.2 1:0.289289 2:0.408066 3:0.434685 5:0.817819  
51.2 1:0.284493 2:0.323272 3:0.587838 4:0.0173611 5:0.699475  
51.2 1:0.362897 2:0.205536 3:0.612613  
51.2 1:0.539584 2:0.297094 3:0.600225 5:0.756078  
51.2 1:0.492528 2:0.232841 3:0.528153 4:0.0138889 5:0.725825  
51.2 1:0.302634 2:0.238477 3:0.393581  
51.2 1:0.692222 2:0.241608 3:0.561374 5:0.757944  
51.2 1:0.676931 2:0.385646 3:0.521396 5:0.784265

51.2 1:0.590533 2:0.273672 3:0.526464 4:0.00347222 5:0.715606  
51.2 1:0.657677 2:0.222695 3:0.579392 5:0.816614  
51.2 1:0.516508 2:0.218061 3:0.552365 5:0.731737  
51.2 1:0.634253 2:0.336298 3:0.625 5:0.800109  
51.2 1:0.342601 2:0.222695 3:0.618806 4:0.0104167 5:0.800855  
51.2 1:0.630708 2:0.303858 3:0.614302 5:0.695341  
51.2 1:0.38076 2:0.1498 3:0.527027 4:0.00347222 5:0.838084  
51.2 1:0.522277 2:0.354459 3:0.518581 4:0.0138889 5:0.684951  
51.2 1:0.478905 2:0.18512 3:0.516329 4:0.00694444 5:0.754528  
51.2 1:0.558282 2:0.31989 3:0.567568 4:0.0104167 5:0.819972  
51.2 1:0.419128 2:0.219439 3:0.566441 4:0.0104167 5:0.692729  
51.2 1:0.672621 2:0.466057 3:0.65259 4:0.00694444 5:0.78326  
51.2 1:0.694446 2:0.721318 3:0.539414 4:0.00347222 5:0.874221  
51.2 1:0.590047 2:0.285571 3:0.601914 5:0.783117  
51.2 1:0.642525 2:0.83016 3:0.503378 4:0.00347222 5:0.876862  
51.2 1:0.32015 2:0.159068 3:0.578829 4:0.00347222 5:0.757542  
51.2 1:0.593939 2:0.25 3:0.577703 4:0.0243056 5:0.723844  
51.2 1:0.730938 2:0.285571 3:0.586149 4:0.00347222 5:0.785241  
51.2 1:0.446375 2:0.183241 3:0.613176 4:0.0104167 5:0.687534  
51.2 1:0.586641 2:0.186623 3:0.768581  
51.2 1:0.609439 2:0.210922 3:0.614865 4:0.00694444 5:0.813399  
51.2 1:0.515187 2:0.356087 3:0.583333 5:0.810729  
51.2 1:0.607076 2:0.306989 3:0.552365 4:0.00694444 5:0.733632  
51.2 1:0.513797 2:0.105461 3:0.730856 4:0.00347222  
51.2 1:0.541114 2:0.348322 3:0.58277 4:0.0138889 5:0.633227  
51.2 1:0.533329 2:0.187124 3:0.608108 4:0.00347222 5:0.734321  
51.2 2:0.432866 3:0.662162  
51.2 1:0.556683 2:0.147545 3:0.798986 4:0.00347222  
51.2 1:0.298603 2:0.158943 3:0.559122 4:0.00347222 5:0.74563  
51.2 1:0.626677 2:0.182866 3:0.777027 4:0.00694444  
51.2 1:0.451519 2:0.259018 3:0.604167 4:0.00347222 5:0.826803  
51.2 1:0.271217 2:0.263151 3:0.420608  
51.2 1:0.568638 2:0.359093 3:0.637387 4:0.0173611 5:0.838428  
51.2 1:0.73205 2:0.228707 3:0.625 4:0.00694444 5:0.841327  
51.2 1:0.563286 2:0.245741 3:0.670045 5:0.754241

51.2 1:0.537847 2:0.405311 3:0.556869 4:0.00694444 5:0.724045  
51.2 1:0.625078 2:0.255386 3:0.645833 4:0.00347222 5:0.80163  
51.2 1:0.660179 2:0.453783 3:0.634572 4:0.00694444 5:0.698987  
51.2 1:0.57267 2:0.368362 3:0.540541 4:0.00694444 5:0.713425  
51.2 1:0.870508 2:0.29772 3:0.723536 4:0.00347222 5:0.78458  
51.2 1:0.747272 2:0.279684 3:0.57714 4:0.00347222 5:0.844714  
51.2 1:0.665323 2:0.34256 3:0.507883 5:0.762536  
51.2 1:0.627302 2:0.292335 3:0.793356 4:0.0173611  
51.2 1:0.612706 2:0.196393 3:0.532658 5:0.790178  
51.2 1:0.697435 2:0.370616 3:0.501126 5:0.71575  
51.2 1:0.380621 2:0.12262 3:0.66723  
51.2 1:0.602627 2:0.475952 3:0.572072 4:0.00347222 5:0.727834  
51.2 1:0.711198 2:0.235095 3:0.655968 4:0.00694444 5:0.842475  
51.2 1:0.623897 2:0.233843 3:0.598536 4:0.00694444 5:0.745544  
51.2 1:0.699242 2:0.26979 3:0.566441 4:0.00694444 5:0.709406  
51.2 1:0.710503 2:0.322771 3:0.486486 5:0.839261  
51.2 1:0.441649 2:0.0920591 3:0.705518 4:0.0104167 5:0.789173  
51.2 1:0.877806 2:0.223447 3:0.600788 5:0.688711  
51.2 1:0.711476 2:0.213302 3:0.622748 5:0.763742  
51.2 1:0.3597 2:0.150175 3:0.585023 5:0.000344442  
51.2 1:0.825884 2:0.188753 3:0.570946 5:0.895749  
51.2 2:0.293337 3:0.526464 4:0.00347222  
51.2 1:0.598665 2:0.231338 3:0.67286 4:0.00347222 5:0.858693  
51.2 1:0.726837 2:0.278307 3:0.567568 4:0.00694444 5:0.902293  
51.2 1:0.569125 2:0.430611 3:0.479167 4:0.00347222 5:0.754069  
51.2 1:0.424272 2:0.175476 3:0.532095 4:0.00694444 5:0.762364  
51.2 1:0.541253 2:0.292585 3:0.538851 4:0.00694444 5:0.807572  
51.2 1:0.627928 2:0.354208 3:0.554054 5:0.835816  
51.2 1:0.734344 2:0.371743 3:0.536036 5:0.895433  
51.2 1:0.346285 2:0.171718 3:0.532095 5:0.74385  
51.2 1:0.629527 2:0.25 3:0.663288 4:0.00347222 5:0.81093  
51.2 1:0.47807 2:0.177856 3:0.655968  
51.2 1:0.50073 2:0.230586 3:0.538288 5:0.742702  
51.2 1:0.627511 2:0.327154 3:0.586712 4:0.00347222 5:0.710669  
51.2 1:0.544658 2:0.34018 3:0.66723 4:0.00347222 5:0.775424

51.2 1:0.353444 2:0.173848 3:0.78491 4:0.0104167  
51.2 1:0.359978 2:0.175476 3:0.662162 4:0.00347222  
51.2 1:0.668173 2:0.251002 3:0.61036 4:0.00694444 5:0.799191  
51.2 1:0.52325 2:0.220817 3:0.733671  
51.2 1:0.584973 2:0.260145 3:0.58277 4:0.00347222 5:0.891042  
51.2 1:0.606242 2:0.438627 3:0.574324 5:0.720888  
51.2 1:0.833947 2:0.362851 3:0.715653 5:0.694911  
51.2 1:0.814346 2:0.351077 3:0.673986 5:0.783547  
51.2 1:0.749357 2:0.238101 3:0.660473 5:0.720945  
51.2 1:0.577535 2:0.284068 3:0.646959 5:0.846924  
51.2 1:0.53743 2:0.414704 3:0.643018 5:0.86983  
51.2 1:0.464447 2:0.307991 3:0.633446 4:0.0104167 5:0.727891  
51.2 1:0.709529 2:0.264404 3:0.615991 4:0.00347222 5:0.676627  
51.2 1:0.653715 2:0.361473 3:0.545045 4:0.0138889 5:0.701513  
51.2 1:0.265239 2:0.246368 3:0.411599  
51.2 1:0.629596 2:0.380386 3:0.608108 5:0.79721  
51.2 1:0.813373 2:0.47996 3:0.573198 4:0.00347222 5:0.749734  
51.2 1:0.676444 2:0.234719 3:0.652027 4:0.00347222 5:0.814977  
51.2 1:0.683256 2:0.356839 3:0.642455 4:0.0138889 5:0.688051  
51.2 1:0.830124 2:0.421718 3:0.642455 4:0.00347222 5:0.758977  
51.2 1:0.757142 2:0.358592 3:0.599662 5:0.678492  
51.2 1:0.601307 2:0.475576 3:0.53491 5:0.825282  
51.2 1:0.433099 2:0.533943 3:0.538851 4:0.00694444 5:0.805448  
51.2 1:0.700215 2:0.239604 3:0.567005 5:0.814719  
51.2 1:0.814972 2:0.232089 3:0.650338 4:0.00347222 5:0.786044  
51.2 1:0.433586 2:0.329158 3:0.557432 5:0.705933  
51.2 1:0.625773 2:0.385521 3:0.673423 4:0.00347222 5:0.868567  
51.2 1:0.259887 2:0.270291 3:0.458333 4:0.00347222  
51.2 1:0.511781 2:0.288327 3:0.507883 4:0.0104167 5:0.697465  
51.2 1:0.646764 2:0.236974 3:0.67455 5:0.80694  
51.2 1:0.398415 2:0.211423 3:0.682995 5:0.745974  
51.2 1:0.542295 2:0.129259 3:0.649212 4:0.00347222 5:0.831338  
51.2 1:0.563356 2:0.103707 3:0.65259 5:0.814289  
51.2 1:0.669146 2:0.268287 3:0.71509 4:0.0138889 5:0.77927  
51.2 1:0.37089 2:0.210421 3:0.647523 4:0.0104167 5:0.779959

51.2 1:0.337249 2:0.170466 3:0.52759 4:0.00694444  
51.2 1:0.776604 2:0.299975 3:0.597973 5:0.764861  
51.2 1:0.723639 2:0.504634 3:0.633446 4:0.00694444 5:0.853899  
51.2 1:0.342531 2:0.16007 3:0.622748  
51.2 1:0.578925 2:0.320391 3:0.650901 5:0.80209  
51.2 1:0.527282 2:0.241984 3:0.752815 4:0.00694444 5:0.779041  
51.2 1:0.541114 2:0.307114 3:0.586712 4:0.00694444 5:0.692098  
51.2 1:0.275457 2:0.226578 3:0.533221 5:0.794139  
51.2 1:0.439842 2:0.381263 3:0.563626 5:0.821464  
51.2 1:0.298811 2:0.160321 3:0.467342 4:0.00347222  
51.2 1:0.571975 2:0.137525 3:0.756757 4:0.00347222  
51.2 1:0.343296 2:0.19489 3:0.5625  
51.2 1:0.654758 2:0.350827 3:0.561374 4:0.00694444 5:0.720629  
51.2 1:0.601307 2:0.250752 3:0.802365  
51.2 1:0.457218 2:0.242234 3:0.652027 5:0.736301  
51.2 1:0.27087 2:0.229584 3:0.452703  
51.2 1:0.460763 2:0.168712 3:0.520833 5:0.776199  
51.2 1:0.748175 2:0.250501 3:0.621622 4:0.00694444 5:0.830879  
51.2 1:0.438868 2:0.276052 3:0.548423 4:0.0208333 5:0.798042  
51.2 1:0.508028 2:0.34256 3:0.572072 4:0.00347222 5:0.695973  
51.2 1:0.419128 2:0.184995 3:0.729167  
51.2 1:0.62758 2:0.349198 3:0.559685 5:0.759666  
51.2 1:0.542573 2:0.340681 3:0.394707 4:0.0104167 5:0.836448  
51.2 1:0.31591 2:0.354208 3:0.642455 4:0.00694444 5:0.720486  
51.2 1:0.471467 2:0.232214 3:0.616554 4:0.00694444 5:0.74121  
51.2 1:0.277125 2:0.218562 3:0.47973  
51.2 1:0.338778 2:0.216182 3:0.683559 5:0.704469  
51.2 1:0.387572 2:0.197645 3:0.638514 4:0.00347222  
51.2 1:0.66852 2:0.250626 3:0.633446 5:0.76268  
51.2 1:0.338361 2:0.209419 3:0.63232 4:0.00694444 5:0.711588  
51.2 1:0.501216 2:0.173472 3:0.604167 5:0.74807  
51.2 1:0.75318 2:0.274674 3:0.668356 4:0.00694444 5:0.894486  
51.2 1:0.64739 2:0.49737 3:0.555743 4:0.00347222 5:0.819914  
51.2 1:0.727254 2:0.293086 3:0.558559 4:0.00694444 5:0.929476  
51.2 1:0.583026 2:0.301478 3:0.659347 5:0.702948

51.2 1:0.735456 2:0.25476 3:0.572072 5:0.687993  
51.2 1:0.656843 2:0.30749 3:0.635135 5:0.892907  
51.2 1:0.715994 2:0.236473 3:0.63795 5:0.816901  
51.2 1:0.742059 2:0.228833 3:0.568131 5:0.776285  
51.2 1:0.802878 2:0.322019 3:0.641892 5:0.774448  
51.2 1:0.712935 2:0.422345 3:0.624437 5:0.904331  
51.2 1:0.768889 2:0.211673 3:0.669482 4:0.00347222 5:0.834869  
51.2 1:0.545075 2:0.205661 3:0.538851 4:0.00694444 5:0.712851  
51.2 1:0.425871 2:0.249248 3:0.797297 4:0.00347222  
51.2 1:0.46827 2:0.246493 3:0.653716 4:0.00347222 5:0.741095  
51.2 1:0.690484 2:0.584795 3:0.658221 5:0.853899  
51.2 1:0.556683 2:0.308116 3:0.529279 4:0.00694444 5:0.746807  
51.2 2:0.364228 3:0.588964  
51.2 2:0.501253 3:0.550676  
51.2 1:0.671161 2:0.8001 3:0.529279 5:0.884526  
51.2 1:0.572322 2:0.359469 3:0.675113 5:0.904044  
51.2 1:0.479739 2:0.24023 3:0.795608  
51.2 1:0.565511 2:0.443262 3:0.568131 5:0.781882  
51.2 1:0.351637 2:0.199274 3:0.594032 5:0.710439  
51.2 1:0.68833 2:0.291082 3:0.615991 5:0.679153  
51.2 1:0.631334 2:0.151177 3:0.623311 5:0.838859  
51.2 1:0.472093 2:0.237851 3:0.576577 5:0.720945  
51.2 1:0.661152 2:0.451403 3:0.628941 4:0.00347222 5:0.821493  
51.2 1:0.62202 2:0.149299 3:0.651464 4:0.00347222 5:0.802922  
51.2 1:0.541392 2:0.284569 3:0.64527 4:0.00347222 5:0.741812  
51.2 1:0.569264 2:0.173848 3:0.627815 5:0.780533  
51.2 1:0.827831 2:0.340306 3:0.619932 5:0.63205  
51.2 1:0.58115 2:0.274048 3:0.721284 5:0.762479  
51.2 1:0.334399 2:0.165832 3:0.510698  
51.2 1:0.479739 2:0.281688 3:0.603041 5:0.716238  
51.2 1:0.407173 2:0.183742 3:0.619932 5:0.000344442  
51.2 1:0.637937 2:0.282941 3:0.601914 5:0.868768  
51.2 1:0.820185 2:0.193011 3:0.58277 4:0.00347222 5:0.792072  
51.2 1:0.59943 2:0.296092 3:0.604167 4:0.00694444 5:0.670082  
51.2 1:0.40474 2:0.188878 3:0.769144 4:0.0138889 5:0.76357

51.2 1:0.524988 2:0.241358 3:0.551239 4:0.0104167 5:0.699963  
51.2 1:0.476472 2:0.19514 3:0.669482 5:0.77307  
51.2 1:0.382012 2:0.25263 3:0.631194 4:0.0104167 5:0.667183  
51.2 1:0.385417 2:0.144038 3:0.728604 5:0.764373  
51.2 1:0.480573 2:0.221944 3:0.498311 4:0.0104167 5:0.766354  
51.2 1:0.653368 2:0.265155 3:0.742117  
51.2 1:0.733092 2:0.334419 3:0.498874 5:0.736473  
51.2 1:0.560019 2:0.240731 3:0.60473 4:0.00347222 5:0.783059  
51.2 1:0.547091 2:0.326904 3:0.572072 4:0.00347222 5:0.667442  
51.2 1:0.703691 2:0.388652 3:0.5625 4:0.00347222 5:0.724303  
51.2 1:0.566414 2:0.191633 3:0.679617 4:0.00347222 5:0.755963  
51.2 1:0.613888 2:0.246994 3:0.586712 4:0.00347222 5:0.686673  
51.2 1:0.576284 2:0.330035 3:0.559685 5:0.86297  
51.2 1:0.742476 2:0.413452 3:0.788288 5:0.890898  
51.2 1:0.560089 2:0.21017 3:0.723536  
51.2 1:0.433169 2:0.307991 3:0.644707 4:0.0104167 5:0.818479  
51.2 1:0.466115 2:0.23234 3:0.701577 4:0.00694444 5:0.793651  
51.2 1:0.322096 2:0.224699 3:0.685811 4:0.00694444 5:0.702374  
51.2 1:0.516021 2:0.20253 3:0.746059 4:0.00347222  
51.2 1:0.485647 2:0.458041 3:0.538288 4:0.0104167 5:0.69161  
51.2 1:0.580246 2:0.346192 3:0.627815 4:0.0104167 5:0.704469  
51.2 1:0.403211 2:0.317886 3:0.581644 4:0.0104167 5:0.717041  
51.2 1:0.512963 2:0.39003 3:0.540541 5:0.783518  
51.2 1:0.469174 2:0.436498 3:0.493806 4:0.00347222 5:0.748759  
51.2 1:0.69396 2:0.35258 3:0.759572 4:0.00347222 5:0.854502  
51.2 1:0.662056 2:0.302355 3:0.708896 4:0.0104167 5:0.714975  
51.2 1:0.578439 2:0.176478 3:0.57714 4:0.00694444 5:0.892563  
51.2 1:0.381386 2:0.10258 3:0.61768 4:0.00347222  
51.2 1:0.315632 2:0.12024 3:0.52027 4:0.03125 5:0.707397  
51.2 1:0.521999 2:0.158442 3:0.740428 4:0.00347222 5:0.81779  
51.2 1:0.498575 2:0.475827 3:0.560811 4:0.0173611 5:0.692155  
51.2 1:0.352471 2:0.153557 3:0.622185 5:0.745171  
51.2 1:0.410788 2:0.304359 3:0.716779 4:0.00347222 5:0.734321  
51.2 1:0.425106 2:0.141533 3:0.623874 4:0.00694444  
51.2 1:0.405644 2:0.153682 3:0.686374

51.2 1:0.512894 2:0.482841 3:0.551239 4:0.00347222 5:0.768765  
51.2 1:0.536318 2:0.198647 3:0.541104 4:0.00694444 5:0.809151  
51.2 1:0.604643 2:0.212174 3:0.574887 4:0.00347222 5:0.725308  
51.2 1:0.322374 2:0.442009 3:0.537162 4:0.00694444 5:0.818479  
51.2 1:0.446862 2:0.268161 3:0.538288 5:0.717501  
51.2 1:0.279419 2:0.241483 3:0.694257 5:0.75183  
51.2 1:0.508793 2:0.352204 3:0.766892 4:0.00347222  
51.2 1:0.491346 2:0.325276 3:0.619932 4:0.0173611 5:0.735986  
51.2 1:0.337874 2:0.324023 3:0.618806 5:0.78237  
51.2 1:0.491972 2:0.470817 3:0.685248 4:0.00694444 5:0.792675  
51.2 1:0.470355 2:0.197395 3:0.667793  
51.2 1:0.555919 2:0.281062 3:0.71509 4:0.0138889 5:0.708172  
21.61633231259155 1:0.704386 2:0.455536 3:0.653716 5:0.701857  
51.2 1:0.679502 2:0.366859 3:0.706081 4:0.00347222 5:0.69293  
51.2 1:0.500382 2:0.200526 3:0.598536 4:0.0347222 5:0.665174  
51.2 1:0.392855 2:0.138277 3:0.624437 4:0.0104167  
51.2 1:0.518871 2:0.205536 3:0.618806 4:0.0104167 5:0.669881  
51.2 1:0.424063 2:0.232465 3:0.468468 4:0.0104167 5:0.74474  
51.2 1:0.380065 2:0.270666 3:0.567005 5:0.705215  
51.2 1:0.501981 2:0.195767 3:0.609797 4:0.0208333 5:0.724102  
51.2 1:0.550775 2:0.395541 3:0.590653 4:0.00347222 5:0.698929  
51.2 1:0.335164 2:0.176227 3:0.487613 4:0.00347222  
51.2 1:0.369292 2:0.137149 3:0.603604 4:0.00347222  
51.2 1:0.625356 2:0.29271 3:0.639077 4:0.00347222 5:0.670111  
51.2 1:0.320498 2:0.193262 3:0.411036 4:0.00347222  
51.2 1:0.649267 2:0.262776 3:0.706644 4:0.00694444 5:0.864721  
51.2 1:0.465559 2:0.240356 3:0.594032 4:0.00694444 5:0.709062  
51.2 1:0.627302 2:0.193262 3:0.605293 4:0.00694444 5:0.748701  
51.2 1:0.67137 2:0.396293 3:0.670045 4:0.0104167 5:0.778581  
51.2 1:0.373254 2:0.173472 3:0.601351 4:0.00694444 5:0.74807  
51.2 1:0.545979 2:0.258267 3:0.586712 4:0.0138889 5:0.747639  
51.2 1:0.556336 2:0.200401 3:0.617117 5:0.744568  
51.2 1:0.716758 2:0.377756 3:0.798986 4:0.00694444  
51.2 1:0.616251 2:0.409193 3:0.535473 4:0.00347222 5:0.760671  
51.2 1:0.358796 2:0.24524 3:0.698761 4:0.0138889 5:0.773128



51.2 1:0.560297 2:0.269163 3:0.664414 5:0.760584  
51.2 1:0.59797 2:0.327655 3:0.615991 4:0.00694444 5:0.823129  
51.2 1:0.263293 2:0.190256 3:0.390766 4:0.00347222  
51.2 1:0.486759 2:0.162199 3:0.664414 5:0.783547  
51.2 1:0.654132 2:0.501378 3:0.619369 5:0.740377  
51.2 1:0.430736 2:0.193387 3:0.525338 4:0.0138889 5:0.7361  
51.2 1:0.612497 2:0.427605 3:0.545608 4:0.0208333 5:0.89107  
51.2 1:0.505039 2:0.114479 3:0.708896 4:0.00347222  
51.2 1:0.290054 2:0.265406 3:0.458333 5:0.801516  
51.2 1:0.45986 2:0.230586 3:0.653716 5:0.768507  
51.2 1:0.590394 2:0.206413 3:0.532658 5:0.774075  
51.2 1:0.374505 2:0.133392 3:0.776464 4:0.00347222  
51.2 1:0.517273 2:0.494364 3:0.579392 5:0.793766  
51.2 1:0.627789 2:0.333292 3:0.559685 5:0.773271  
51.2 1:0.507959 2:0.198773 3:0.58277 5:0.71839  
51.2 1:0.550845 2:0.449023 3:0.495495 5:0.872384  
51.2 1:0.472579 2:0.244739 3:0.613739 4:0.00347222 5:0.764459  
51.2 1:0.325711 2:0.134018 3:0.563626 4:0.0104167 5:0.704469  
51.2 1:0.404949 2:0.150175 3:0.646959 4:0.00347222 5:0.708459  
51.2 1:0.286161 2:0.222695 3:0.493243  
51.2 1:0.60784 2:0.222194 3:0.666104 4:0.00347222 5:0.720141  
51.2 1:0.385834 2:0.17986 3:0.707207 4:0.00347222  
51.2 1:0.701745 2:0.255762 3:0.538851 5:0.742846  
51.2 1:0.772155 2:0.716558 3:0.538851 5:0.892706  
51.2 1:0.638354 2:0.243236 3:0.586712 4:0.0104167 5:0.712793  
51.2 1:0.557239 2:0.333918 3:0.545045 4:0.00694444 5:0.685094  
51.2 1:0.346841 2:0.198647 3:0.388514  
51.2 1:0.462848 2:0.374123 3:0.681306 4:0.0104167 5:0.793077  
51.2 1:0.625078 2:0.167084 3:0.757883 4:0.0173611  
51.2 1:0.403072 2:0.17485 3:0.643018  
51.2 1:0.44575 2:0.149299 3:0.690878  
51.2 1:0.67978 2:0.473071 3:0.5625 5:0.868567  
51.2 1:0.511434 2:0.26265 3:0.636824 4:0.00347222 5:0.884526  
51.2 1:0.660805 2:0.276177 3:0.572072 4:0.00347222 5:0.730675  
51.2 1:0.385139 2:0.150676 3:0.589527 4:0.00347222

51.2 1:0.540418 2:0.213552 3:0.567005 4:0.00347222 5:0.723155  
51.2 1:0.657538 2:0.193262 3:0.5625 4:0.0104167 5:0.746233  
51.2 1:0.759088 2:0.290581 3:0.64527 5:0.794541  
51.2 1:0.386808 2:0.183617 3:0.629505  
51.2 1:0.499548 2:0.320767 3:0.615991 4:0.0104167 5:0.674043  
51.2 1:0.376242 2:0.175225 3:0.545045 4:0.0138889 5:0.705215  
51.2 1:0.615347 2:0.291082 3:0.592905 4:0.00347222 5:0.691897  
51.2 1:0.672482 2:0.288828 3:0.479167 4:0.0208333 5:0.668044  
51.2 1:0.522625 2:0.143287 3:0.564189 4:0.0173611 5:0.718419  
39.75159516834857 1:0.690693 2:0.445015 3:0.791104  
51.2 1:0.543894 2:0.398046 3:0.623874 4:0.00347222 5:0.783949  
51.2 1:0.590881 2:0.210671 3:0.547297 4:0.00694444 5:0.751801  
51.2 1:0.473135 2:0.317134 3:0.541667 4:0.00694444 5:0.736904  
51.2 1:0.291722 2:0.263527 3:0.554617 4:0.0104167 5:0.728178  
51.2 1:0.472996 2:0.2877 3:0.790541  
51.2 1:0.424272 2:0.181738 3:0.615991 5:0.714802  
51.2 1:0.45423 2:0.198898 3:0.775338 4:0.00347222  
51.2 1:0.316536 2:0.227956 3:0.478604  
51.2 1:0.371933 2:0.116483 3:0.63795 5:0.712937  
51.2 1:0.561896 2:0.435997 3:0.461149 5:0.745199  
51.2 1:0.352054 2:0.193136 3:0.632883  
51.2 1:0.523876 2:0.296593 3:0.538288 4:0.00694444 5:0.668619  
51.2 1:0.60089 2:0.203156 3:0.586712 5:0.74296  
51.2 1:0.277473 2:0.215306 3:0.489865  
51.2 1:0.324321 2:0.208166 3:0.551239  
51.2 1:0.344617 2:0.195516 3:0.577703  
32.90807802406757 2:0.468687 3:0.666104  
51.2 1:0.315285 2:0.235596 3:0.643018 4:0.00347222 5:0.796435  
51.2 1:0.736846 2:0.193387 3:0.539977 4:0.00694444 5:0.864663  
51.2 1:0.478557 2:0.0978206 3:0.706644 4:0.00694444  
51.2 1:0.58254 2:0.283191 3:0.570946 4:0.00347222 5:0.680301  
51.2 1:0.439007 2:0.221944 3:0.662725 4:0.00694444  
51.2 1:0.47112 2:0.166583 3:0.683559 4:0.00347222  
51.2 1:0.537082 2:0.342184 3:0.538851 4:0.00347222 5:0.79345  
51.2 1:0.300063 2:0.223071 3:0.45777

51.2 1:0.269479 2:0.137525 3:0.714527 4:0.00347222 5:0.753667  
51.2 1:0.333843 2:0.218562 3:0.568694 5:0.79345  
51.2 1:0.568916 2:0.255135 3:0.627815 4:0.00347222 5:0.682654  
51.2 1:0.688052 2:0.347194 3:0.606982 4:0.00694444 5:0.837768  
51.2 1:0.428929 2:0.125626 3:0.75 4:0.00694444  
51.2 1:0.344756 2:0.161197 3:0.672297  
22.21845056369028 1:0.508654 2:0.390531 3:0.515203 4:0.0138889 5:0.652516  
51.2 1:0.699103 2:0.289704 3:0.657658 5:0.726743  
51.2 1:0.29485 2:0.225326 3:0.67455 4:0.00694444 5:0.750481  
51.2 1:0.368597 2:0.191633 3:0.519144  
51.2 1:0.33711 2:0.329158 3:0.508446 5:0.778381  
51.2 1:0.532912 2:0.289704 3:0.697635 4:0.00347222 5:0.795574  
51.2 1:0.78133 2:0.621117 3:0.559685 4:0.00347222 5:0.85499  
51.2 1:0.701189 2:0.198522 3:0.545045 5:0.846121  
51.2 1:0.756655 2:0.54772 3:0.413288 4:0.00347222 5:0.895347  
51.2 1:0.570724 2:0.260396 3:0.796171 4:0.0104167  
30.42473022656347 1:0.549593 2:0.196142 3:0.586149 4:0.00347222 5:0.704613  
51.2 1:0.33148 2:0.139028 3:0.772523 5:0.775912  
51.2 1:0.305901 2:0.28482 3:0.609234 5:0.777204  
51.2 1:0.665253 2:0.325025 3:0.613176 4:0.00694444 5:0.754126  
51.2 1:0.70661 2:0.208542 3:0.546171 4:0.00694444 5:0.725279  
51.2 1:0.574199 2:0.293963 3:0.774775 4:0.00347222  
51.2 1:0.866199 2:0.294965 3:0.635135 5:0.692959  
51.2 1:0.516438 2:0.270416 3:0.488739 4:0.0416667 5:0.745372  
51.2 1:0.737471 2:0.294088 3:0.653716 5:0.706392  
51.2 1:0.693473 2:0.235721 3:0.719595 4:0.00694444 5:0.817015  
51.2 1:0.769584 2:0.17247 3:0.548986 5:0.870002  
51.2 1:0.708209 2:0.41984 3:0.648649 4:0.00347222 5:0.76024  
51.2 1:0.29485 2:0.297345 3:0.603041 4:0.00694444 5:0.722552  
51.2 1:0.315424 2:0.172971 3:0.741554 4:0.00347222 5:0.727633  
51.2 1:0.584486 2:0.246493 3:0.619369 4:0.00347222 5:0.71618  
51.2 1:0.313547 2:0.229334 3:0.516329  
51.2 1:0.405018 2:0.137776 3:0.618243 5:0.000430552  
51.2 1:0.661778 2:0.204284 3:0.644144 4:0.00694444 5:0.830563  
51.2 1:0.610134 2:0.277555 3:0.681306 5:0.721634

51.2 1:0.553069 2:0.29246 3:0.551802 4:0.00347222 5:0.741267  
51.2 1:0.537916 2:0.234469 3:0.689189 5:0.759924  
51.2 1:0.486689 2:0.305987 3:0.690878 4:0.00347222 5:0.755619  
51.2 1:0.52193 2:0.218437 3:0.670045 5:0.791785  
51.2 1:0.316814 2:0.255386 3:0.617117 4:0.00694444 5:0.698901  
51.2 1:0.347536 2:0.146293 3:0.581644 4:0.00347222  
51.2 1:0.628415 2:0.369739 3:0.605293 4:0.00347222 5:0.660725  
51.2 1:0.308959 2:0.314128 3:0.530968 5:0.755045  
51.2 1:0.653229 2:0.252255 3:0.591779 5:0.715778  
51.2 1:0.583791 2:0.255135 3:0.551239 4:0.0104167 5:0.745228  
51.2 1:0.276847 2:0.22257 3:0.470721  
51.2 1:0.294224 2:0.237099 3:0.477477  
51.2 1:0.338292 2:0.199274 3:0.581644 5:0.711674  
51.2 1:0.329464 2:0.205787 3:0.573198  
51.2 1:0.612914 2:0.142159 3:0.622185 4:0.00347222 5:0.797296  
51.2 1:0.484187 2:0.180611 3:0.622748 5:0.722954  
51.2 1:0.536943 2:0.202154 3:0.722973 4:0.00347222  
51.2 1:0.669424 2:0.263277 3:0.78491  
51.2 1:0.711337 2:0.315506 3:0.570946 5:0.69029  
51.2 1:0.703899 2:0.296593 3:0.581644 5:0.747323  
51.2 1:0.496629 2:0.260396 3:0.753378 4:0.00347222  
51.2 1:0.289289 2:0.155686 3:0.76464 4:0.0625 5:0.711415  
51.2 1:0.536178 2:0.399048 3:0.600225 5:0.706392  
51.2 1:0.601863 2:0.238477 3:0.565878 4:0.00347222 5:0.797669  
51.2 1:0.622089 2:0.214304 3:0.757883 4:0.00347222  
51.2 1:0.741225 2:0.459168 3:0.451014 5:0.822584  
51.2 1:0.438312 2:0.155686 3:0.716779 4:0.00347222  
51.2 1:0.619379 2:0.224198 3:0.574887 4:0.00347222 5:0.795201  
51.2 1:0.339751 2:0.16007 3:0.441441 5:0.849249  
51.2 1:0.289428 2:0.204033 3:0.412725 4:0.00694444  
51.2 1:0.730312 2:0.239228 3:0.625563 5:0.706392  
51.2 1:0.590603 2:0.313627 3:0.686937 4:0.00347222 5:0.706392  
51.2 1:0.264544 2:0.258517 3:0.403716 4:0.00347222  
51.2 1:0.412803 2:0.251378 3:0.723536 4:0.00347222  
51.2 1:0.428859 2:0.170466 3:0.614865

51.2 1:0.308959 2:0.0898046 3:0.530405 4:0.00347222 5:0.796952  
51.2 1:0.769792 2:0.263026 3:0.6875 4:0.00347222 5:0.716008  
51.2 1:0.51192 2:0.20253 3:0.532658 4:0.00347222 5:0.836247  
51.2 1:0.711059 2:0.350701 3:0.632883 4:0.00347222 5:0.705388  
51.2 2:0.331037 3:0.627252  
51.2 1:0.7447 2:0.262776 3:0.556869 5:0.766153  
51.2 1:0.55286 2:0.139279 3:0.65991 4:0.00694444 5:0.884354  
51.2 1:0.905053 2:0.178858 3:0.462838 4:0.00694444 5:0.860559  
51.2 1:0.649336 2:0.250251 3:0.525338 5:0.776888  
51.2 1:0.283033 2:0.171468 3:0.507883  
51.2 1:0.43164 2:0.412325 3:0.525338 4:0.00347222 5:0.835845  
51.2 1:0.730034 2:0.368988 3:0.582207 5:0.77396  
51.2 1:0.67137 2:0.233592 3:0.656532 5:0.772123  
51.2 1:0.515743 2:0.289704 3:0.669482 4:0.00694444 5:0.743994  
51.2 1:0.626468 2:0.337926 3:0.643018 4:0.00347222 5:0.71265  
51.2 1:0.556614 2:0.17247 3:0.640203 5:0.770545  
51.2 1:0.702162 2:0.379885 3:0.561937 4:0.00694444 5:0.688252  
51.2 1:0.626955 2:0.234594 3:0.683559 4:0.00694444 5:0.786618  
51.2 1:0.489678 2:0.208166 3:0.54223 4:0.00694444 5:0.845059  
51.2 1:0.611594 2:0.633893 3:0.612613 4:0.00694444 5:0.89948  
51.2 1:0.887607 2:0.384644 3:0.614302 5:0.629237  
51.2 1:0.865295 2:0.436122 3:0.596847 5:0.863802  
51.2 1:0.762633 2:0.437876 3:0.611486 4:0.00347222 5:0.868567  
51.2 1:0.685271 2:0.420466 3:0.536599 5:0.695829  
51.2 1:0.703899 2:0.348572 3:0.670045 5:0.721002  
51.2 1:0.438173 2:0.49236 3:0.603604 5:0.802377  
51.2 1:0.800584 2:0.350451 3:0.59009 5:0.691753  
51.2 1:0.511364 2:0.392911 3:0.521959 4:0.00347222 5:0.706765  
51.2 1:0.656426 2:0.189504 3:0.704392 4:0.0138889 5:0.766354  
51.2 1:0.753597 2:0.430862 3:0.753378 4:0.00347222 5:0.762651  
51.2 1:0.652047 2:0.335797 3:0.540541 5:0.744051  
51.2 1:0.547508 2:0.18512 3:0.604167 4:0.0138889 5:0.774907  
51.2 1:0.791131 2:0.50238 3:0.695946 5:0.880393  
51.2 1:0.557726 2:0.130261 3:0.728604  
51.2 1:0.254466 2:0.255636 3:0.403153 4:0.00694444

51.2 1:0.732606 2:0.353457 3:0.476914 4:0.00347222 5:0.712937  
51.2 1:0.654758 2:0.379008 3:0.60473 4:0.00347222 5:0.76733  
51.2 1:0.379023 2:0.256638 3:0.541104 5:0.800654  
51.2 1:0.296935 2:0.17773 3:0.462275  
51.2 1:0.332175 2:0.166207 3:0.560811 5:0.834008  
51.2 1:0.712866 2:0.297219 3:0.54223 4:0.00347222 5:0.742846  
51.2 1:0.772225 2:0.427605 3:0.446509 5:0.757886  
51.2 1:0.452005 2:0.315005 3:0.603041 4:0.0138889 5:0.648182  
51.2 1:0.527143 2:0.216558 3:0.538851 5:0.743936  
51.2 1:0.507542 2:0.188377 3:0.569257 4:0.0104167 5:0.763168  
51.2 1:0.402377 2:0.163076 3:0.721847 4:0.00694444  
51.2 1:0.523389 2:0.218186 3:0.706644 4:0.0104167 5:0.800339  
51.2 1:0.567735 2:0.417209 3:0.457207 5:0.745171  
51.2 1:0.454369 2:0.119364 3:0.599099 4:0.0104167 5:0.703838  
51.2 1:0.354834 2:0.122871 3:0.722973 4:0.00347222  
51.2 1:0.578786 2:0.358091 3:0.635698 4:0.00694444 5:0.728781  
51.2 1:0.496837 2:0.260772 3:0.712275 4:0.00694444 5:0.000344442  
51.2 1:0.295614 2:0.246618 3:0.481419  
51.2 1:0.253354 2:0.203282 3:0.43018 4:0.00347222  
51.2 1:0.649058 2:0.310371 3:0.554054 4:0.00694444 5:0.71486  
51.2 1:0.35254 2:0.180486 3:0.594595 4:0.00694444 5:0.786475  
51.2 1:0.459443 2:0.246368 3:0.625 5:0.728178  
51.2 1:0.495447 2:0.213051 3:0.654842 5:0.774563  
51.2 1:0.634948 2:0.152305 3:0.559122 4:0.00694444 5:0.823818  
51.2 1:0.575728 2:0.170215 3:0.629505 4:0.0173611 5:0.694767  
51.2 1:0.436644 2:0.214805 3:0.610923 5:0.709263  
51.2 1:0.549385 2:0.144664 3:0.559685 4:0.00694444 5:0.74807  
51.2 1:0.442274 2:0.250251 3:0.648649 4:0.00347222 5:0.697064  
51.2 1:0.459373 2:0.28507 3:0.565878 5:0.747869  
51.2 1:0.491833 2:0.188878 3:0.75 4:0.00694444  
51.2 1:0.57962 2:0.209043 3:0.626126 5:0.803812  
51.2 1:0.423229 2:0.205035 3:0.71509 4:0.00347222  
51.2 1:0.39494 2:0.34494 3:0.55518 5:0.727231  
51.2 1:0.426496 2:0.231588 3:0.661036  
51.2 1:0.346424 2:0.317761 3:0.677365 5:0.757226

51.2 1:0.384514 2:0.161323 3:0.597973 4:0.00694444  
51.2 1:0.709599 2:0.424474 3:0.672297 4:0.00347222 5:0.694997  
51.2 1:0.708417 2:0.173472 3:0.801239 4:0.0104167  
51.2 2:0.329409 3:0.538288  
51.2 1:0.470842 2:0.184744 3:0.724662 4:0.00347222  
51.2 1:0.609231 2:0.248246 3:0.630068 4:0.00694444 5:0.693504  
51.2 1:0.516716 2:0.293712 3:0.670045 4:0.0104167 5:0.661701  
51.2 1:0.473483 2:0.136147 3:0.776464 4:0.00347222  
51.2 1:0.543685 2:0.311122 3:0.65259 5:0.7018  
51.2 1:0.596024 2:0.277806 3:0.589527 4:0.00347222 5:0.781911  
51.2 1:0.632793 2:0.338803 3:0.630068 4:0.0104167 5:0.76644  
51.2 1:0.558421 2:0.279434 3:0.532095 4:0.00347222 5:0.751543  
51.2 1:0.534302 2:0.442385 3:0.67286 4:0.00347222 5:0.785528  
51.2 1:0.384027 2:0.107089 3:0.613739 4:0.0104167 5:0.69913  
51.2 1:0.502537 2:0.312375 3:0.685248 4:0.00347222 5:0.738224  
51.2 1:0.625009 2:0.219314 3:0.548423 4:0.00347222 5:0.808519  
51.2 1:0.408702 2:0.245616 3:0.586712 5:0.76578  
51.2 2:0.360972 3:0.559685  
51.2 1:0.632585 2:0.278307 3:0.54786 4:0.00347222 5:0.742501  
51.2 1:0.548481 2:0.271919 3:0.677365 5:0.745171  
51.2 1:0.509627 2:0.310746 3:0.591216 4:0.00694444 5:0.725365  
51.2 1:0.602071 2:0.381513 3:0.47241 5:0.742874  
51.2 1:0.543199 2:0.180361 3:0.624437 5:0.761216  
51.2 1:0.604018 2:0.408442 3:0.469595 4:0.00347222 5:0.809466  
51.2 1:0.590603 2:0.232089 3:0.61205 5:0.706392  
51.2 1:0.541114 2:0.171718 3:0.753378 4:0.00347222  
51.2 1:0.258775 2:0.150301 3:0.678491 5:0.757858  
51.2 1:0.55008 2:0.121618 3:0.601351 4:0.00694444 5:0.751141  
51.2 1:0.728783 2:0.499624 3:0.615991 4:0.00347222 5:0.713597  
18.56382075693073 1:0.346146 2:0.200526 3:0.622185  
51.2 1:0.655175 2:0.387275 3:0.675113 4:0.00347222 5:0.783318  
51.2 1:0.531382 2:0.196518 3:0.558559 4:0.00347222 5:0.724992  
51.2 1:0.577883 2:0.263527 3:0.586712 4:0.00347222 5:0.72238  
51.2 2:0.379259 3:0.657095 4:0.00347222  
51.2 1:0.443803 2:0.106964 3:0.688626 4:0.00694444

51.2 1:0.480781 2:0.314254 3:0.557995 5:0.699762  
51.2 1:0.507194 2:0.14767 3:0.679617  
51.2 1:0.446584 2:0.101829 3:0.783784 4:0.00347222  
51.2 1:0.318829 2:0.347445 3:0.51464 4:0.0104167 5:0.724389  
51.2 1:0.275666 2:0.17247 3:0.458896  
51.2 1:0.581011 2:0.239855 3:0.590653 4:0.00694444 5:0.733603  
51.2 1:0.494544 2:0.121117 3:0.592905 5:0.844198  
51.2 1:0.545284 2:0.277806 3:0.657658 5:0.778065  
51.2 1:0.441996 2:0.21493 3:0.666667 4:0.00694444 5:0.740004  
51.2 1:0.618962 2:0.20516 3:0.659347 5:0.806481  
51.2 1:0.55856 2:0.214679 3:0.533221 4:0.00347222 5:0.73013  
51.2 1:0.627997 2:0.213928 3:0.641892 5:0.777376  
51.2 1:0.619518 2:0.270792 3:0.784347 4:0.00347222  
51.2 1:0.469452 2:0.191759 3:0.697635 4:0.00347222 5:0.745458  
51.2 1:0.342531 2:0.144289 3:0.601914 4:0.00347222  
51.2 1:0.547508 2:0.282941 3:0.63795 5:0.710698  
51.2 1:0.802947 2:0.396293 3:0.694257 4:0.00694444 5:0.807888  
51.2 1:0.561201 2:0.193763 3:0.740428  
51.2 1:0.414332 2:0.151303 3:0.626126  
51.2 1:0.623619 2:0.29008 3:0.741554 4:0.0104167  
51.2 1:0.489817 2:0.345942 3:0.56982 5:0.719538  
51.2 1:0.552304 2:0.248747 3:0.75 4:0.0104167  
51.2 1:0.388128 2:0.154183 3:0.679054 4:0.0208333 5:0.744711  
51.2 1:0.598596 2:0.19752 3:0.532095 5:0.795746  
51.2 1:0.58539 2:0.340431 3:0.560248 5:0.705215  
51.2 1:0.680892 2:0.278682 3:0.666104 4:0.00347222 5:0.8696  
51.2 1:0.576215 2:0.151678 3:0.631194 4:0.0104167 5:0.739487  
51.2 1:0.589769 2:0.134644 3:0.599662 4:0.00347222 5:0.803467  
51.2 1:0.479878 2:0.110095 3:0.689189  
51.2 1:0.497324 2:0.268537 3:0.677928 4:0.00694444 5:0.713338  
51.2 1:0.505804 2:0.24023 3:0.480293 4:0.00347222 5:0.795459  
51.2 1:0.787377 2:0.273672 3:0.579392 5:0.812624  
51.2 1:0.582053 2:0.176478 3:0.761824  
51.2 1:0.576493 2:0.228332 3:0.560248 4:0.00694444 5:0.775022  
51.2 1:0.522069 2:0.552355 3:0.470721 5:0.745831



51.2 1:0.634323 2:0.378006 3:0.543919 4:0.0173611 5:0.70312  
51.2 1:0.536874 2:0.133893 3:0.629505 4:0.00347222 5:0.760785  
51.2 1:0.413359 2:0.145291 3:0.600225 4:0.0104167 5:0.762048  
51.2 1:0.550636 2:0.171969 3:0.609234 4:0.00694444 5:0.7111  
51.2 1:0.45409 2:0.182114 3:0.545608 5:0.769396  
51.2 1:0.654827 2:0.249248 3:0.632883 4:0.00347222 5:0.714716  
51.2 1:0.797873 2:0.249624 3:0.595158 5:0.684348  
51.2 1:0.392021 2:0.201904 3:0.602477  
51.2 1:0.3964 2:0.154309 3:0.639077 5:0.774649  
51.2 1:0.558282 2:0.359218 3:0.81982  
51.2 1:0.587892 2:0.190381 3:0.723536  
51.2 1:0.491833 2:0.387525 3:0.481419 4:0.00694444 5:0.778065  
51.2 1:0.450337 2:0.21017 3:0.753378 4:0.0138889  
51.2 1:0.693195 2:0.537951 3:0.440315 5:0.805075  
51.2 1:0.302843 2:0.151052 3:0.523086  
51.2 1:0.302009 2:0.187249 3:0.397523 4:0.00694444  
51.2 1:0.270383 2:0.3998 3:0.449324 4:0.0104167 5:0.749017  
51.2 1:0.369848 2:0.150676 3:0.837275 4:0.00694444  
51.2 1:0.411066 2:0.220691 3:0.722973  
51.2 1:0.246055 2:0.210922 3:0.404279 4:0.00347222  
51.2 1:0.444081 2:0.154434 3:0.631194 4:0.00347222  
51.2 1:0.313894 2:0.180987 3:0.658221 4:0.0104167 5:0.723901  
51.2 1:0.681866 2:0.369364 3:0.604167 5:0.778811  
51.2 1:0.299089 2:0.143537 3:0.623311 4:0.0104167 5:0.708258  
51.2 1:0.527977 2:0.2252 3:0.473536 4:0.0104167 5:0.793852  
51.2 1:0.481685 2:0.327154 3:0.559685 5:0.745171  
51.2 2:0.349073 3:0.50732  
51.2 1:0.494683 2:0.400802 3:0.582207 4:0.00347222 5:0.714802  
51.2 1:0.405227 2:0.336298 3:0.52027 4:0.00347222 5:0.715692  
51.2 1:0.404115 2:0.188001 3:0.675676 4:0.00347222  
51.2 1:0.512059 2:0.165205 3:0.806869  
51.2 1:0.367971 2:0.194765 3:0.551239  
51.2 1:0.300341 2:0.237725 3:0.630068 4:0.00694444 5:0.727346  
51.2 1:0.347675 2:0.529559 3:0.481982 5:0.898677  
51.2 1:0.558004 2:0.292585 3:0.613739 4:0.00347222 5:0.766813

51.2 1:0.318829 2:0.221944 3:0.453829 4:0.00347222  
51.2 1:0.282964 2:0.256513 3:0.689189 4:0.00694444 5:0.746548  
51.2 1:0.409467 2:0.187625 3:0.753378 4:0.00347222 5:0.787594  
51.2 1:0.270383 2:0.177104 3:0.444257  
51.2 1:0.29054 2:0.210296 3:0.545045  
51.2 1:0.519705 2:0.282565 3:0.614865 5:0.68541  
51.2 1:0.49642 2:0.291458 3:0.621622 5:0.771233  
51.2 1:0.347397 2:0.122119 3:0.75  
51.2 1:0.853409 2:0.338552 3:0.742117 5:0.706392  
51.2 1:0.603531 2:0.366358 3:0.55518 4:0.0104167 5:0.644938  
51.2 1:0.321818 2:0.223196 3:0.496622  
51.2 1:0.446097 2:0.16746 3:0.606419 4:0.00347222 5:0.726714  
51.2 1:0.420171 2:0.249123 3:0.792793 4:0.0173611  
51.2 1:0.584556 2:0.301603 3:0.753378 4:0.0138889  
25.24335874090776 1:0.6403 2:0.352079 3:0.40259 4:0.0104167 5:0.853899  
51.2 1:0.442622 2:0.0822896 3:0.740991 4:0.00694444  
51.2 1:0.33565 2:0.144414 3:0.441441  
51.2 1:0.277403 2:0.216308 3:0.522523 4:0.00347222 5:0.761446  
51.2 1:0.286856 2:0.123121 3:0.607545 5:0.813973  
20.43870388210794 1:0.328282 2:0.174349 3:0.307432 4:0.00347222  
51.2 2:0.448397 3:0.558559  
51.2 1:0.416557 2:0.173096 3:0.646959 4:0.00347222  
51.2 1:0.387781 2:0.243737 3:0.601914 5:0.705215  
51.2 1:0.567735 2:0.13765 3:0.803491  
51.2 1:0.484743 2:0.263778 3:0.557432 4:0.0104167 5:0.702804  
51.2 1:0.534927 2:0.156939 3:0.645833 5:0.767932  
51.2 1:0.339473 2:0.163828 3:0.66723 4:0.00694444 5:0.757427  
51.2 1:0.565372 2:0.21255 3:0.68018 4:0.00347222 5:0.727374  
51.2 1:0.568082 2:0.1999 3:0.755068  
51.2 1:0.461667 2:0.146167 3:0.552365 4:0.00347222 5:0.746577  
51.2 1:0.327448 2:0.104835 3:0.698198 4:0.00347222 5:0.894084  
51.2 1:0.436436 2:0.20754 3:0.534347 4:0.0138889 5:0.689773  
51.2 1:0.435324 2:0.309118 3:0.788851 4:0.00347222  
51.2 1:0.317092 2:0.318011 3:0.606982 5:0.779529  
51.2 1:0.472718 2:0.205035 3:0.69482 4:0.0138889

51.2 1:0.274831 2:0.18249 3:0.412162  
51.2 1:0.527421 2:0.185496 3:0.74268  
51.2 1:0.354556 2:0.122244 3:0.763514 4:0.00347222  
51.2 1:0.400709 2:0.189755 3:0.631757 4:0.00347222 5:0.713568  
51.2 1:0.487941 2:0.12738 3:0.598536 4:0.00694444 5:0.745171  
51.2 1:0.592827 2:0.386523 3:0.565878 5:0.69692  
51.2 1:0.658094 2:0.325276 3:0.627252 5:0.669881  
51.2 1:0.461528 2:0.159193 3:0.686374 5:0.736588  
51.2 1:0.419754 2:0.215055 3:0.648086  
51.2 1:0.38222 2:0.137901 3:0.601914  
51.2 1:0.663029 2:0.373121 3:0.617117 4:0.00694444 5:0.856196  
51.2 1:0.293181 2:0.202154 3:0.426802 4:0.00694444  
51.2 1:0.422117 2:0.333793 3:0.650338 4:0.0138889 5:0.720313  
51.2 1:0.26232 2:0.260271 3:0.5  
51.2 1:0.308542 2:0.21731 3:0.394707  
51.2 1:0.598735 2:0.291082 3:0.64527 4:0.00347222 5:0.728178  
51.2 1:0.71787 2:0.289579 3:0.610923 5:0.820115  
51.2 1:0.724126 2:0.201278 3:0.63964 4:0.00347222 5:0.769396  
51.2 1:0.386877 2:0.143662 3:0.722973 5:0.793852  
51.2 1:0.701536 2:0.311623 3:0.560248 5:0.674043  
51.2 1:0.535066 2:0.223447 3:0.682432 5:0.766268  
51.2 1:0.627441 2:0.289203 3:0.78491 4:0.00694444  
51.2 1:0.377841 2:0.200401 3:0.607545  
51.2 1:0.31869 2:0.216683 3:0.671171 4:0.00347222 5:0.765005  
51.2 1:0.296379 2:0.163702 3:0.640766 4:0.00694444 5:0.699647  
51.2 1:0.280253 2:0.218813 3:0.522523 4:0.00347222  
51.2 1:0.405157 2:0.307866 3:0.613739 4:0.00347222 5:0.6925  
51.2 1:0.476472 2:0.228582 3:0.677365 4:0.00347222  
51.2 1:0.397095 2:0.208667 3:0.75  
51.2 1:0.503858 2:0.200902 3:0.59741 5:0.755188  
51.2 1:0.392021 2:0.298973 3:0.579392 5:0.724389  
51.2 1:0.657538 2:0.361723 3:0.601351 5:0.780906  
51.2 1:0.620977 2:0.313502 3:0.636261 4:0.00694444 5:0.686558  
51.2 1:0.510391 2:0.223196 3:0.524212 4:0.00694444 5:0.743879  
51.2 1:0.303607 2:0.107214 3:0.613739 5:0.73722

51.2 1:0.527004 2:0.310872 3:0.740991 4:0.00694444  
51.2 1:0.352193 2:0.17986 3:0.578829 4:0.00694444  
51.2 1:0.56975 2:0.32753 3:0.595721 4:0.0104167 5:0.75691  
51.2 1:0.813165 2:0.242735 3:0.690878 4:0.0104167 5:0.710095  
51.2 1:0.560784 2:0.275802 3:0.51464 5:0.753581  
51.2 1:0.67707 2:0.341433 3:0.588964 4:0.00694444 5:0.812423  
51.2 1:0.256551 2:0.241733 3:0.405405 4:0.00694444  
51.2 1:0.544658 2:0.303607 3:0.638514 4:0.00694444 5:0.656879  
51.2 1:0.701884 2:0.399173 3:0.675113 5:0.694193  
51.2 1:0.481268 2:0.263277 3:0.652027 5:0.802606  
51.2 1:0.405853 2:0.303357 3:0.494369 4:0.0104167 5:0.761991  
51.2 1:0.607979 2:0.215932 3:0.543919 4:0.00347222 5:0.745171  
51.2 1:0.518385 2:0.249248 3:0.63964 5:0.697609  
51.2 1:0.369361 2:0.156563 3:0.675676 5:0.786561  
51.2 1:0.333704 2:0.171844 3:0.601914  
51.2 1:0.261 2:0.20253 3:0.441441 4:0.00347222  
51.2 1:0.370404 2:0.117735 3:0.643018  
51.2 2:0.382891 3:0.484797 4:0.00347222  
51.2 1:0.705081 2:0.245115 3:0.634572 5:0.724877  
51.2 1:0.785014 2:0.174724 3:0.636261 4:0.00347222 5:0.821005  
51.2 1:0.652742 2:0.248998 3:0.673986 4:0.00347222 5:0.722122  
51.2 1:0.809689 2:0.361348 3:0.662162 5:0.706392  
51.2 1:0.805658 2:0.421092 3:0.649212 5:0.706392  
51.2 1:0.690276 2:0.250626 3:0.670045 4:0.00347222 5:0.706392  
51.2 1:0.318829 2:0.188502 3:0.627815 5:0.725279  
51.2 1:0.38507 2:0.151678 3:0.66723  
51.2 1:0.682074 2:0.346693 3:0.552928 4:0.00347222 5:0.759522  
51.2 1:0.607632 2:0.217184 3:0.589527 5:0.760412  
51.2 1:0.412803 2:0.293712 3:0.516329 4:0.00694444 5:0.807228  
51.2 1:0.500313 2:0.146794 3:0.540541 4:0.00347222 5:0.760269  
51.2 1:0.494057 2:0.245867 3:0.50732 5:0.76977  
51.2 1:0.72774 2:0.285571 3:0.584459 4:0.00347222 5:0.700824  
51.2 2:0.411072 3:0.56982  
51.2 1:0.360117 2:0.163201 3:0.63795 4:0.00694444  
51.2 1:0.384166 2:0.178231 3:0.615991 4:0.00347222

51.2 1:0.608883 2:0.400802 3:0.618806 4:0.00347222 5:0.682798  
51.2 1:0.789671 2:0.346819 3:0.529279 5:0.853899  
51.2 1:0.613123 2:0.203156 3:0.54786 5:0.787881  
51.2 1:0.304998 2:0.220942 3:0.412162 4:0.0104167  
51.2 1:0.548759 2:0.381764 3:0.542793 4:0.00694444 5:0.747553  
51.2 1:0.377285 2:0.194765 3:0.668919 4:0.00347222  
51.2 1:0.431709 2:0.500125 3:0.592905 4:0.00347222 5:0.823043  
51.2 1:0.409328 2:0.171468 3:0.673423  
51.2 1:0.701258 2:0.34018 3:0.537162 5:0.781882  
51.2 1:0.487871 2:0.263778 3:0.557432 4:0.00347222 5:0.713281  
51.2 1:0.517968 2:0.153933 3:0.690315 4:0.00347222  
51.2 1:0.46827 2:0.183742 3:0.559685 5:0.727891  
51.2 1:0.47814 2:0.198773 3:0.686937 4:0.00347222  
51.2 1:0.294989 2:0.213176 3:0.649775 5:0.722839  
51.2 1:0.405227 2:0.165957 3:0.603604  
51.2 1:0.403003 2:0.195641 3:0.624437 4:0.0173611 5:0.712851  
51.2 1:0.351498 2:0.170967 3:0.545045  
51.2 1:0.483492 2:0.179359 3:0.670045 4:0.00347222  
51.2 1:0.543129 2:0.320641 3:0.536036 5:0.715061  
51.2 1:0.352262 2:0.213677 3:0.474662  
51.2 1:0.264961 2:0.204785 3:0.47241 4:0.00347222  
51.2 1:0.447487 2:0.268287 3:0.652027 4:0.00347222 5:0.871208  
51.2 1:0.53597 2:0.197144 3:0.627815 4:0.00347222 5:0.792187  
51.2 1:0.399597 2:0.144038 3:0.603604  
51.2 1:0.492876 2:0.217811 3:0.560811 5:0.776457  
51.2 1:0.686036 2:0.148923 3:0.582207 4:0.00347222 5:0.855449  
51.2 1:0.479322 2:0.195516 3:0.556306 5:0.750911  
51.2 1:0.336137 2:0.14742 3:0.561937  
51.2 1:0.412108 2:0.32753 3:0.647523 4:0.00694444 5:0.677832  
51.2 1:0.286092 2:0.172846 3:0.587838 4:0.00694444 5:0.726944  
51.2 1:0.508167 2:0.144915 3:0.75  
51.2 1:0.371446 2:0.16483 3:0.568131 4:0.00347222  
51.2 1:0.537152 2:0.143537 3:0.660473 4:0.00347222 5:0.761302  
51.2 1:0.616946 2:0.259519 3:0.61205 4:0.00694444 5:0.710181  
51.2 2:0.334669 3:0.596847 4:0.00347222

51.2 1:0.468757 2:0.372871 3:0.689189 5:0.785155  
51.2 1:0.422048 2:0.195015 3:0.518581 5:0.756996  
51.2 1:0.272607 2:0.185997 3:0.453266 4:0.00347222  
51.2 1:0.278446 2:0.180611 3:0.461149 5:0.830449  
51.2 1:0.394384 2:0.146167 3:0.655405 4:0.00694444  
51.2 1:0.370682 2:0.150676 3:0.670045 4:0.00694444 5:0.000430552  
51.2 1:0.306179 2:0.245616 3:0.407095 4:0.00347222  
51.2 1:0.35268 2:0.108843 3:0.644144  
51.2 1:0.371377 2:0.13765 3:0.609797  
51.2 1:0.673525 2:0.371743 3:0.650901 5:0.770257  
51.2 1:0.447696 2:0.148672 3:0.583896 4:0.0104167 5:0.697552  
51.2 2:0.374499 3:0.588964  
51.2 1:0.39063 2:0.158943 3:0.604167 4:0.0208333 5:0.725193  
51.2 1:0.391117 2:0.0939379 3:0.655405 4:0.00694444 5:0.703091  
51.2 1:0.282269 2:0.266784 3:0.473536  
51.2 1:0.768472 2:0.321017 3:0.539977 4:0.00347222 5:0.873131  
51.2 1:0.486689 2:0.269163 3:0.636824 4:0.00694444 5:0.66483  
51.2 1:0.586919 2:0.161323 3:0.67455 4:0.00347222 5:0.796349  
51.2 1:0.56273 2:0.234344 3:0.708333 4:0.00347222  
51.2 1:0.390213 2:0.14266 3:0.622185 4:0.00347222  
51.2 1:0.641412 2:0.271167 3:0.668919 5:0.823789  
51.2 1:0.336345 2:0.327029 3:0.628941 4:0.0138889 5:0.792043  
51.2 1:0.495308 2:0.216934 3:0.681306  
51.2 1:0.497602 2:0.280686 3:0.515766 5:0.74807  
51.2 1:0.356919 2:0.157064 3:0.591216  
51.2 1:0.652742 2:0.300476 3:0.600225 4:0.00347222 5:0.659175  
51.2 1:0.308473 2:0.183116 3:0.41723 4:0.00347222  
51.2 1:0.410579 2:0.257265 3:0.774775  
51.2 1:0.356016 2:0.169464 3:0.675676  
51.2 1:0.671857 2:0.246994 3:0.609797 4:0.00347222 5:0.8293  
51.2 1:0.439285 2:0.291583 3:0.740991 4:0.00347222 5:0.750251  
51.2 1:0.597484 2:0.355711 3:0.557995 4:0.0104167 5:0.675364  
38.76362531103406 2:0.260772 3:0.634572 5:0.805075  
51.2 2:0.341683 3:0.489302  
51.2 1:0.501633 2:0.118111 3:0.736486 4:0.0104167

51.2 1:0.345451 2:0.197896 3:0.584459  
51.2 2:0.416333 3:0.375  
51.2 1:0.382081 2:0.109719 3:0.708333  
51.2 1:0.541114 2:0.207415 3:0.76295 4:0.00694444  
51.2 1:0.436575 2:0.176102 3:0.664977  
51.2 1:0.35546 2:0.42986 3:0.609797 5:0.826516  
51.2 1:0.345729 2:0.129133 3:0.658221  
51.2 1:0.869674 2:0.337425 3:0.594032 5:0.775539  
51.2 1:0.479947 2:0.282189 3:0.664414 5:0.722552  
51.2 1:0.530618 2:0.226954 3:0.547297 5:0.733517  
51.2 1:0.781886 2:0.702029 3:0.533221 5:0.851517  
51.2 1:0.315841 2:0.218186 3:0.42286  
51.2 1:0.656773 2:0.231839 3:0.622185 5:0.730991  
51.2 1:0.488427 2:0.148923 3:0.726914  
51.2 1:0.395357 2:0.162575 3:0.622748  
51.2 1:0.288802 2:0.199274 3:0.480293 4:0.0104167  
51.2 1:0.542643 2:0.231338 3:0.649775 4:0.0173611 5:0.716324  
51.2 1:0.291235 2:0.27242 3:0.411036 4:0.00347222  
51.2 1:0.417599 2:0.177981 3:0.735923 4:0.00347222  
51.2 1:0.49364 2:0.325777 3:0.468468 4:0.0138889 5:0.72881  
51.2 1:0.351359 2:0.119614 3:0.690315 4:0.00347222  
51.2 1:0.41322 2:0.225451 3:0.68018  
51.2 1:0.32439 2:0.220441 3:0.541104  
51.2 1:0.286092 2:0.234594 3:0.44482  
51.2 1:0.271078 2:0.212174 3:0.682432 4:0.0138889 5:0.748931  
51.2 1:0.434142 2:0.120992 3:0.647523 4:0.0138889 5:0.723758  
51.2 1:0.420797 2:0.175351 3:0.578829 4:0.00347222 5:0.720945  
51.2 1:0.328908 2:0.110596 3:0.629505 4:0.00694444 5:0.735067  
51.2 1:0.506985 2:0.265531 3:0.486486 5:0.824679  
37.83017282918492 1:0.503927 2:0.140281 3:0.675113  
51.2 1:0.274275 2:0.263652 3:0.42286 4:0.00347222  
51.2 1:0.403211 2:0.17009 3:0.667793 4:0.00347222  
51.2 1:0.33996 2:0.152054 3:0.496622 4:0.00347222  
51.2 1:0.391465 2:0.186748 3:0.673423  
51.2 2:0.413201 3:0.51295

51.2 1:0.428442 2:0.218687 3:0.748311  
51.2 1:0.667478 2:0.256513 3:0.570946 5:0.706392  
51.2 1:0.357197 2:0.198773 3:0.61205 4:0.00347222  
51.2 1:0.334399 2:0.153557 3:0.476914  
51.2 1:0.42601 2:0.1875 3:0.81982  
51.2 1:0.487454 2:0.146167 3:0.701577 4:0.0104167  
51.2 1:0.314451 2:0.244865 3:0.462838  
51.2 1:0.365538 2:0.121493 3:0.619932  
51.2 1:0.414888 2:0.203783 3:0.649212 4:0.00347222  
51.2 1:0.359978 2:0.190631 3:0.684122 4:0.00694444  
51.2 1:0.521304 2:0.221067 3:0.561937 5:0.853899  
51.2 1:0.344964 2:0.137149 3:0.551239  
51.2 1:0.361646 2:0.122495 3:0.57545  
51.2 1:0.713491 2:0.622119 3:0.462275 5:0.805591  
51.2 1:0.60221 2:0.274048 3:0.654842 4:0.00347222 5:0.725193  
51.2 1:0.274067 2:0.196142 3:0.509009 4:0.00694444 5:0.771922  
51.2 1:0.507681 2:0.167836 3:0.67455  
51.2 1:0.551609 2:0.38502 3:0.609797 4:0.00694444 5:0.709492  
51.2 1:0.414888 2:0.19013 3:0.746059 4:0.0104167  
51.2 1:0.415792 2:0.134269 3:0.721284  
51.2 1:0.30048 2:0.187249 3:0.540541  
51.2 1:0.451727 2:0.320641 3:0.599099 4:0.00694444 5:0.670312  
51.2 1:0.610412 2:0.37262 3:0.57714 5:0.775281  
51.2 1:0.639119 2:0.209669 3:0.636261 5:0.741698  
51.2 1:0.405227 2:0.23735 3:0.713964 4:0.00694444 5:0.000344442  
51.2 1:0.407521 2:0.149299 3:0.707207 4:0.00347222  
51.2 1:0.333078 2:0.175601 3:0.589527  
51.2 1:0.508098 2:0.172219 3:0.63795 4:0.0104167 5:0.685353  
51.2 1:0.679641 2:0.386398 3:0.746059 4:0.00347222 5:0.824249  
51.2 1:0.286439 2:0.18249 3:0.535473  
51.2 1:0.445263 2:0.269289 3:0.573198 4:0.00347222 5:0.705043  
51.2 1:0.614096 2:0.191132 3:0.63964 4:0.0208333 5:0.73943  
51.2 1:0.58539 2:0.304108 3:0.634572 5:0.715692  
51.2 1:0.37937 2:0.212049 3:0.628378 4:0.00694444 5:0.703579  
51.2 1:0.291791 2:0.212675 3:0.593468 5:0.720888



51.2 2:0.365606 3:0.628941 4:0.00347222  
51.2 1:0.296518 2:0.421468 3:0.412162 4:0.00347222 5:0.760527  
51.2 1:0.472371 2:0.183617 3:0.739302 4:0.00347222  
51.2 1:0.475777 2:0.1875 3:0.727477  
51.2 1:0.479461 2:0.207791 3:0.727477  
51.2 1:0.404879 2:0.170716 3:0.623311  
51.2 1:0.563217 2:0.163702 3:0.746059  
51.2 1:0.419545 2:0.144414 3:0.664414 4:0.00347222  
51.2 2:0.291708 3:0.528716 4:0.00694444  
51.2 1:0.422951 2:0.387275 3:0.515766 4:0.00694444 5:0.785872  
51.2 1:0.354695 2:0.15982 3:0.52027 4:0.00347222  
51.2 1:0.2553 2:0.281814 3:0.435811  
51.2 1:0.588309 2:0.378632 3:0.532658 5:0.714946  
51.2 1:0.600125 2:0.252505 3:0.697635 5:0.820402  
51.2 1:0.312296 2:0.218813 3:0.614865 4:0.0243056 5:0.704469  
51.2 1:0.392716 2:0.19752 3:0.619369  
51.2 1:0.708 2:0.335045 3:0.551239 5:0.706392  
51.2 1:0.412247 2:0.243988 3:0.740991 4:0.00347222  
51.2 1:0.476958 2:0.268788 3:0.576577 4:0.00347222 5:0.700307  
51.2 1:0.416974 2:0.234093 3:0.636824 5:0.705273  
51.2 1:0.703204 2:0.516658 3:0.629505 5:0.783978  
51.2 1:0.419337 2:0.22495 3:0.73536  
51.2 1:0.296796 2:0.189379 3:0.54786  
51.2 1:0.341767 2:0.180361 3:0.597973  
51.2 1:0.92528 2:0.206538 3:0.478604 5:0.731938  
51.2 1:0.411135 2:0.242485 3:0.55518 4:0.00694444 5:0.688252  
51.2 1:0.383263 2:0.0875501 3:0.649212 4:0.00347222  
51.2 1:0.597484 2:0.401804 3:0.574324 4:0.00694444 5:0.853899  
51.2 1:0.644262 2:0.409694 3:0.642455 5:0.70091  
51.2 1:0.435393 2:0.155436 3:0.666667 5:0.762823  
51.2 1:0.628554 2:0.2748 3:0.655405 4:0.00347222 5:0.788341  
51.2 1:0.335025 2:0.174349 3:0.578829  
51.2 1:0.529645 2:0.305987 3:0.748311 4:0.00694444  
51.2 1:0.598735 2:0.294088 3:0.642455 5:0.778983  
51.2 1:0.332731 2:0.190506 3:0.419482

51.2 1:0.330298 2:0.173848 3:0.516329  
51.2 1:0.571836 2:0.155436 3:0.64527 5:0.797554  
51.2 1:0.364496 2:0.181613 3:0.526464 4:0.00347222 5:0.788542  
51.2 1:0.369709 2:0.199524 3:0.701577 4:0.00694444  
51.2 1:0.448391 2:0.31751 3:0.618806 4:0.0104167 5:0.7361  
51.2 1:0.390005 2:0.172595 3:0.60473 4:0.00694444  
51.2 1:0.447626 2:0.267786 3:0.681869 5:0.736732  
51.2 1:0.507194 2:0.534569 3:0.546734 4:0.00347222 5:0.774046  
51.2 1:0.524918 2:0.228707 3:0.576577 5:0.747811  
51.2 1:0.479669 2:0.148923 3:0.676239 4:0.00694444  
51.2 1:0.364565 2:0.197771 3:0.673423 4:0.00347222 5:0.716955  
51.2 2:0.423973 3:0.506194  
51.2 1:0.572044 2:0.145416 3:0.768581  
51.2 1:0.563078 2:0.17272 3:0.708896 4:0.0104167  
51.2 1:0.333426 2:0.149173 3:0.573761  
51.2 1:0.369917 2:0.212174 3:0.673986 4:0.0104167 5:0.719395  
51.2 1:0.511503 2:0.296217 3:0.662162 4:0.00694444 5:0.689744  
51.2 1:0.335859 2:0.316132 3:0.588401 4:0.00347222 5:0.749419  
51.2 1:0.35685 2:0.203908 3:0.600788 4:0.00694444 5:0.704469  
51.2 1:0.375756 2:0.306112 3:0.54786 4:0.00347222 5:0.750423  
51.2 1:0.433308 2:0.185621 3:0.643018 4:0.00347222  
51.2 1:0.355946 2:0.116483 3:0.640203  
51.2 1:0.280462 2:0.196268 3:0.511824  
51.2 1:0.405018 2:0.165456 3:0.605856 4:0.00694444  
51.2 2:0.439254 3:0.617117  
51.2 1:0.45416 2:0.200025 3:0.685248  
51.2 2:0.340055 3:0.411599 4:0.00347222  
51.2 1:0.498992 2:0.29246 3:0.570383 4:0.00694444 5:0.732599  
51.2 1:0.303121 2:0.202906 3:0.469032  
51.2 1:0.529019 2:0.264279 3:0.723536 4:0.00347222  
51.2 1:0.407243 2:0.190381 3:0.727477 4:0.00347222  
51.2 1:0.387989 2:0.194389 3:0.63795  
51.2 1:0.444638 2:0.162575 3:0.636261 4:0.0104167  
51.2 1:0.461875 2:0.174349 3:0.660473 4:0.00694444  
51.2 2:0.340556 3:0.588964

26.70504101838429 1:0.344478 2:0.128758 3:0.643018 4:0.00347222

51.2 1:0.492458 2:0.251002 3:0.686374

51.2 1:0.441232 2:0.253131 3:0.742117

51.2 1:0.378467 2:0.200401 3:0.695946

51.2 1:0.376868 2:0.213552 3:0.686937

51.2 1:0.425662 2:0.295967 3:0.559685 4:0.00347222 5:0.748759

51.2 1:0.369361 2:0.283442 3:0.600225 4:0.00347222 5:0.742272

51.2 1:0.271565 2:0.154309 3:0.592342 4:0.00347222 5:0.737736

15.71535403695541 1:0.416001 2:0.0718938 3:0.657658 4:0.00694444

51.2 2:0.333667 3:0.596284

51.2 1:0.353931 2:0.0904309 3:0.684122

51.2 1:0.628484 2:0.294088 3:0.692005 5:0.734349

51.2 1:0.256065 2:0.216934 3:0.476914 4:0.00347222

51.2 1:0.505595 2:0.141784 3:0.676239

51.2 1:0.39633 2:0.158317 3:0.686374

51.2 1:0.3075 2:0.151804 3:0.481419 4:0.00347222

51.2 1:0.291583 2:0.169464 3:0.420045

51.2 1:0.282755 2:0.215055 3:0.452703

51.2 1:0.524362 2:0.214554 3:0.710023 4:0.0138889

51.2 1:0.36255 2:0.17748 3:0.5625

51.2 1:0.391395 2:0.151804 3:0.65259 5:0.747036

51.2 1:0.467853 2:0.207916 3:0.597973 5:0.725566

51.2 1:0.354209 2:0.250877 3:0.613739 4:0.00694444 5:0.735986

51.2 1:0.468409 2:0.108592 3:0.666667

51.2 1:0.277612 2:0.381638 3:0.623311 4:0.00347222 5:0.763799

51.2 1:0.33704 2:0.228582 3:0.498874

51.2 1:0.306457 2:0.176478 3:0.401464 4:0.00694444

51.2 2:0.423848 3:0.435811

51.2 2:0.305486 3:0.588964

51.2 1:0.351637 2:0.191884 3:0.596284 4:0.00347222

51.2 1:0.475012 2:0.146668 3:0.664414 4:0.00694444

51.2 1:0.320567 2:0.188878 3:0.495495

51.2 2:0.355962 3:0.576014

51.2 1:0.532703 2:0.262275 3:0.616554 4:0.0104167 5:0.729154

51.2 1:0.264614 2:0.233091 3:0.603604 5:0.772525

51.2 1:0.331132 2:0.230461 3:0.48536 4:0.00347222  
51.2 1:0.329464 2:0.16483 3:0.532095 4:0.00347222  
51.2 1:0.443178 2:0.153808 3:0.688626 4:0.00347222  
51.2 1:0.302843 2:0.262776 3:0.391329 4:0.00347222  
51.2 1:0.272885 2:0.245491 3:0.380631  
51.2 1:0.241885 2:0.240606 3:0.497748  
51.2 1:0.356641 2:0.144915 3:0.702703 4:0.00347222  
51.2 1:0.582401 2:0.260521 3:0.591779 4:0.00347222 5:0.723643  
51.2 1:0.354278 2:0.146543 3:0.63795  
51.2 1:0.364774 2:0.17986 3:0.626126 4:0.00347222  
51.2 1:0.465281 2:0.181738 3:0.736486  
51.2 1:0.478696 2:0.238727 3:0.72241 4:0.00347222  
51.2 1:0.380413 2:0.169714 3:0.597973 4:0.00694444  
51.2 1:0.558282 2:0.21731 3:0.746059 4:0.0138889  
51.2 1:0.423924 2:0.17247 3:0.443694 4:0.00347222 5:0.817015  
51.2 1:0.41892 2:0.161448 3:0.747185  
51.2 1:0.448877 2:0.152305 3:0.680743  
51.2 1:0.383471 2:0.219689 3:0.668919  
51.2 1:0.462779 2:0.142535 3:0.70214  
51.2 1:0.378745 2:0.222821 3:0.783784  
51.2 1:0.266143 2:0.2252 3:0.404842 4:0.00694444  
20.46101611104401 1:0.281296 2:0.23234 3:0.483108 4:0.0104167  
51.2 1:0.249878 2:0.242986 3:0.457207 4:0.0104167  
51.2 1:0.351776 2:0.256638 3:0.683559 4:0.00347222 5:0.694767  
51.2 1:0.253979 2:0.254259 3:0.618806 4:0.00347222 5:0.734895  
51.2 1:0.625912 2:0.308993 3:0.740428 4:0.00694444  
51.2 1:0.440676 2:0.163702 3:0.676239 4:0.0104167  
51.2 1:0.280462 2:0.224574 3:0.481419  
51.2 1:0.268645 2:0.161197 3:0.412725  
51.2 1:0.278307 2:0.273297 3:0.449887  
51.2 1:0.29624 2:0.1751 3:0.533221  
51.2 1:0.54577 2:0.150301 3:0.58277 5:0.783174  
51.2 1:0.497324 2:0.171969 3:0.479167 4:0.00694444 5:0.81337  
51.2 1:0.344756 2:0.166207 3:0.621059 4:0.00694444  
51.2 1:0.558351 2:0.358968 3:0.777027

47.70545202819172 1:0.475985 2:0.108592 3:0.677928 4:0.0277778  
51.2 2:0.314504 3:0.565315  
51.2 1:0.261208 2:0.253507 3:0.443694  
51.2 2:0.420591 3:0.588964  
51.2 1:0.581497 2:0.208417 3:0.629505 4:0.0104167 5:0.730474  
10.99501587900602 1:0.335025 2:0.152931 3:0.481982 4:0.00694444  
51.2 1:0.436366 2:0.158442 3:0.686937 4:0.00347222  
51.2 1:0.297769 2:0.228332 3:0.47973  
51.2 1:0.45409 2:0.29246 3:0.519144 4:0.00694444 5:0.700939  
51.2 1:0.323904 2:0.206914 3:0.404279  
51.2 1:0.283033 2:0.171718 3:0.411599 4:0.00347222  
51.2 2:0.485346 3:0.587275 4:0.00347222  
51.2 1:0.382081 2:0.152305 3:0.615991 4:0.00694444  
51.2 1:0.432682 2:0.185997 3:0.737613 4:0.00347222  
51.2 1:0.412525 2:0.138527 3:0.714527 4:0.00347222  
51.2 2:0.312625 3:0.565878  
51.2 1:0.387086 2:0.11022 3:0.689189 4:0.00347222  
51.2 1:0.396261 2:0.144414 3:0.646959 5:0.742903  
51.2 1:0.482241 2:0.102956 3:0.73705  
51.2 1:0.524223 2:0.294088 3:0.681869 5:0.711616  
51.2 1:0.3018 2:0.159694 3:0.648086 4:0.0173611 5:0.704469  
51.2 1:0.247237 2:0.211047 3:0.449887  
51.2 1:0.346285 2:0.155686 3:0.486486  
51.2 1:0.25954 2:0.199649 3:0.452703  
51.2 1:0.377355 2:0.206037 3:0.625  
31.22904782456513 1:0.305137 2:0.213427 3:0.279279  
20.01902340215427 2:0.409068 3:0.370495 4:0.00347222  
51.2 1:0.318482 2:0.190256 3:0.381757  
51.2 2:0.30248 3:0.556306  
51.2 1:0.581845 2:0.293963 3:0.768581 4:0.00347222  
51.2 1:0.331897 2:0.134519 3:0.592342 4:0.00347222 5:0.753581  
51.2 1:0.509974 2:0.23234 3:0.462275 5:0.87537  
51.2 1:0.497811 2:0.20754 3:0.692005  
51.2 1:0.249531 2:0.221443 3:0.452703 4:0.00347222  
51.2 1:0.334538 2:0.15744 3:0.519707

51.2 1:0.331966 2:0.171343 3:0.512387  
51.2 1:0.359769 2:0.156313 3:0.713401 4:0.00347222  
51.2 1:0.304372 2:0.246368 3:0.481982  
51.2 1:0.44005 2:0.16508 3:0.740991 4:0.00347222  
51.2 1:0.440537 2:0.174724 3:0.714527 4:0.00347222 5:0.773587  
51.2 1:0.345312 2:0.200526 3:0.559685  
51.2 1:0.373323 2:0.142034 3:0.751126  
51.2 1:0.560715 2:0.222821 3:0.616554 4:0.00694444 5:0.693562  
51.2 1:0.397929 2:0.224324 3:0.679054  
10.86589217191258 1:0.45555 2:0.231713 3:0.661599  
51.2 1:0.257733 2:0.135271 3:0.638514 4:0.00347222 5:0.729987  
51.2 1:0.281226 2:0.235346 3:0.491554 4:0.00347222  
51.2 1:0.456106 2:0.154935 3:0.672297 4:0.00347222  
51.2 1:0.308195 2:0.19514 3:0.469595  
51.2 1:0.28352 2:0.525426 3:0.568694 4:0.0104167 5:0.80008  
51.2 1:0.263432 2:0.22232 3:0.402027 4:0.00347222  
51.2 1:0.333565 2:0.195266 3:0.49268 4:0.00347222  
51.2 1:0.476611 2:0.145291 3:0.723536  
51.2 1:0.386251 2:0.161197 3:0.667793 4:0.0208333  
51.2 1:0.305693 2:0.232715 3:0.51295  
51.2 1:0.743727 2:0.391157 3:0.679617 5:0.706392  
51.2 1:0.42872 2:0.194138 3:0.708896  
51.2 1:0.372142 2:0.106212 3:0.630068 4:0.00347222  
51.2 1:0.481129 2:0.211047 3:0.681869  
51.2 1:0.345451 2:0.166834 3:0.609797  
51.2 1:0.412595 2:0.138527 3:0.632883  
51.2 1:0.323556 2:0.141658 3:0.572072 4:0.00347222 5:0.727776  
51.2 1:0.363314 2:0.129384 3:0.646959  
51.2 2:0.485596 3:0.588964  
51.2 2:0.318011 3:0.574887 4:0.00347222  
51.2 1:0.688747 2:0.233467 3:0.615991 4:0.00347222 5:0.705043  
51.2 1:0.449016 2:0.287074 3:0.670045 4:0.00694444 5:0.76799  
51.2 1:0.27219 2:0.199524 3:0.461149 5:0.000344442  
51.2 1:0.435254 2:0.203031 3:0.669482  
51.2 1:0.323834 2:0.213176 3:0.505631

51.2 1:0.653854 2:0.211047 3:0.61036 4:0.0138889 5:0.678923  
51.2 1:0.460624 2:0.148798 3:0.56982 5:0.73455  
51.2 1:0.298394 2:0.216558 3:0.505068  
51.2 1:0.356641 2:0.17272 3:0.670045  
51.2 1:0.362271 2:0.195391 3:0.525338  
51.2 1:0.349552 2:0.188252 3:0.686937 4:0.00347222  
51.2 2:0.401177 3:0.530968  
51.2 1:0.243345 2:0.187751 3:0.444257  
51.2 1:0.267186 2:0.171593 3:0.405405  
51.2 2:0.314755 3:0.609797  
51.2 1:0.254049 2:0.224198 3:0.470721 4:0.00694444  
51.2 2:0.337425 3:0.565315  
51.2 1:0.284354 2:0.193387 3:0.47973  
51.2 2:0.541834 3:0.588964  
51.2 2:0.313502 3:0.584459 4:0.00347222  
51.2 1:0.409606 2:0.315882 3:0.673986 4:0.0104167 5:0.723126  
51.2 1:0.455898 2:0.273923 3:0.744369  
51.2 1:0.470842 2:0.223071 3:0.706644 4:0.00694444  
51.2 1:0.36533 2:0.207039 3:0.720158 5:0.718419  
51.2 2:0.40243 3:0.588964  
51.2 1:0.269618 2:0.229709 3:0.636261 5:0.715692  
51.2 1:0.429832 2:0.127255 3:0.636261  
51.2 1:0.360603 2:0.141658 3:0.581644  
19.14727610735764 2:0.283317 3:0.489865  
51.2 1:0.297421 2:0.185245 3:0.489302  
51.2 1:0.316744 2:0.210671 3:0.544482 4:0.00347222  
51.2 1:0.351984 2:0.215681 3:0.670608 5:0.704871  
51.2 2:0.386648 3:0.433559  
51.2 1:0.668659 2:0.351328 3:0.606982 5:0.747438  
51.2 1:0.369709 2:0.14742 3:0.613176 4:0.03125 5:0.750251  
51.2 1:0.374991 2:0.104083 3:0.724662  
51.2 1:0.255578 2:0.21518 3:0.504505  
51.2 1:0.511712 2:0.235095 3:0.721284  
51.2 1:0.373393 2:0.155185 3:0.565315 4:0.00347222  
51.2 2:0.34519 3:0.588964

51.2 1:0.507472 2:0.173848 3:0.675113  
51.2 1:0.38507 2:0.244238 3:0.727477  
51.2 1:0.292 2:0.191633 3:0.543356  
51.2 1:0.317439 2:0.171468 3:0.494369 4:0.00347222  
51.2 1:0.301453 2:0.229083 3:0.402027 4:0.00694444  
51.2 1:0.426149 2:0.154434 3:0.766892 4:0.00347222  
51.2 2:0.338302 3:0.588964  
51.2 1:0.474248 2:0.27743 3:0.675113 4:0.00347222 5:0.730101  
51.2 1:0.282199 2:0.196894 3:0.491554  
51.2 1:0.352888 2:0.166708 3:0.668919 5:0.720486  
51.2 2:0.433617 3:0.530968  
51.2 2:0.392034 3:0.530968 4:0.00347222  
51.2 1:0.296657 2:0.189003 3:0.43018  
51.2 2:0.378507 3:0.588964  
51.2 2:0.351077 3:0.606982 4:0.00347222  
51.2 1:0.301661 2:0.166834 3:0.447635 4:0.00347222  
51.2 1:0.285536 2:0.210546 3:0.530405  
51.2 1:0.294085 2:0.217184 3:0.492117 4:0.00694444  
51.2 1:0.594634 2:0.213302 3:0.721284  
51.2 1:0.301939 2:0.232715 3:0.408221  
51.2 1:0.273302 2:0.26002 3:0.49268  
51.2 1:0.403211 2:0.191759 3:0.676239  
51.2 1:0.330576 2:0.149048 3:0.465653 4:0.00347222  
51.2 2:0.451152 3:0.588964  
51.2 1:0.297074 2:0.214053 3:0.490991 4:0.00347222  
51.2 2:0.332164 3:0.49268  
51.2 1:0.489609 2:0.194765 3:0.672297  
51.2 2:0.429359 3:0.588964  
51.2 2:0.343186 3:0.400338 4:0.00347222  
51.2 1:0.293181 2:0.162575 3:0.400901  
51.2 2:0.355461 3:0.538288  
51.2 2:0.353081 3:0.588964  
51.2 2:0.353958 3:0.626126 4:0.00347222  
51.2 2:0.308492 3:0.477477  
51.2 1:0.289706 2:0.206789 3:0.42286



51.2 1:0.422326 2:0.216558 3:0.658784  
51.2 1:0.502885 2:0.291207 3:0.56982 5:0.745171  
51.2 2:0.475576 3:0.435248  
51.2 2:0.312124 3:0.588964  
51.2 2:0.36235 3:0.588964  
51.2 2:0.322645 3:0.524775  
51.2 2:0.500877 3:0.588964  
51.2 1:0.285258 2:0.198647 3:0.380631  
51.2 2:0.365481 3:0.588964  
51.2 1:0.297213 2:0.210671 3:0.410473 4:0.00347222  
51.2 2:0.431363 3:0.573198  
51.2 2:0.403432 3:0.558559 4:0.00347222  
51.2 2:0.408317 3:0.568131  
51.2 1:0.274206 2:0.198773 3:0.433559  
51.2 2:0.354584 3:0.588964  
51.2 2:0.427981 3:0.426239 4:0.00347222  
51.2 2:0.456037 3:0.548986  
51.2 1:0.285536 2:0.191884 3:0.411599  
51.2 1:0.306596 2:0.191007 3:0.471847 4:0.00694444  
51.2 1:0.481059 2:0.160571 3:0.668919 4:0.00694444  
51.2 2:0.33517 3:0.532658  
51.2 2:0.44489 3:0.590653 4:0.00347222  
51.2 1:0.335859 2:0.154684 3:0.537725  
51.2 2:0.353958 3:0.485923  
51.2 1:0.565163 2:0.187249 3:0.8125  
51.2 1:0.310002 2:0.198522 3:0.505631  
48.02791332508351 1:0.39216 2:0.157941 3:0.569257 5:0.716266  
51.2 2:0.321393 3:0.588964  
51.2 2:0.432866 3:0.512387  
51.2 1:0.307291 2:0.168963 3:0.519707  
51.2 1:0.332731 2:0.226954 3:0.425676 4:0.00347222  
51.2 1:0.413568 2:0.210797 3:0.684122  
51.2 1:0.361229 2:0.125 3:0.657095 4:0.0104167  
51.2 1:0.281574 2:0.310496 3:0.615991 5:0.733689  
51.2 2:0.342059 3:0.548423

51.2 1:0.292834 2:0.146919 3:0.476914  
51.2 2:0.317761 3:0.478041 4:0.00347222  
51.2 2:0.334043 3:0.581644 4:0.00694444  
51.2 2:0.303231 3:0.557995  
51.2 2:0.484344 3:0.588964  
51.2 2:0.486473 3:0.588964  
51.2 2:0.297345 3:0.573198  
51.2 2:0.393412 3:0.588964  
51.2 2:0.453031 3:0.588964  
51.2 2:0.427104 3:0.588964  
51.2 2:0.300726 3:0.588964  
51.2 2:0.302104 3:0.588964  
51.2 2:0.305611 3:0.508446 4:0.00347222  
51.2 2:0.338803 3:0.551239  
51.2 1:0.342184 2:0.188252 3:0.603604  
51.2 2:0.360972 3:0.545045  
51.2 1:0.261208 2:0.207039 3:0.453266  
51.2 1:0.359213 2:0.15005 3:0.521959  
51.2 2:0.364103 3:0.494369 4:0.00347222  
51.2 2:0.315757 3:0.588964  
51.2 2:0.300601 3:0.444257  
51.2 2:0.345566 3:0.588964  
51.2 1:0.276222 2:0.186623 3:0.442568  
51.2 2:0.404434 3:0.588964  
51.2 1:0.293807 2:0.253507 3:0.394707 4:0.00347222  
51.2 2:0.473697 3:0.554054  
51.2 2:0.346568 3:0.588964  
51.2 1:0.338013 2:0.132265 3:0.508446  
51.2 2:0.366608 3:0.546171  
51.2 1:0.224995 2:0.16007 3:0.629505 5:0.762651  
51.2 2:0.434494 3:0.568131  
51.2 2:0.429359 3:0.568131 4:0.00347222  
51.2 2:0.337801 3:0.525338 4:0.00347222  
51.2 2:0.340807 3:0.631194 4:0.00347222  
51.2 2:0.32515 3:0.588964

51.2 2:0.314629 3:0.588964  
51.2 2:0.397545 3:0.418919  
51.2 1:0.264197 2:0.184494 3:0.412725  
-2386.143868691258 1:0.68402 2:0.331538 3:0.691441 5:0.825225  
-521.9276782002934 1:0.314798 2:0.306363 3:0.265203 5:0.907431  
-2297.982452086638 1:0.514979 2:0.136273 3:0.528153 4:0.0104167 5:0.81713  
-10240 1:0.301453 2:0.20754 3:0.452703  
-6244.235050288924 2:0.380135 3:0.559122  
-10240 1:0.404115 2:0.139654 3:0.682995 4:0.00347222  
-1331.871295327661 1:0.71224 2:0.156688 3:0.616554 4:0.00347222 5:0.964752  
-601.8853080361677 2:0.203532 3:0.583333 5:0.8479  
-5786.605089006446 1:0.672274 2:0.328156 3:0.568694 5:0.792388  
-3507.5276214897 1:0.437617 2:0.394539 3:0.515203 4:0.0104167 5:0.755418  
-2632.234639182152 1:0.617293 2:0.240857 3:0.565315 4:0.0173611 5:0.718964  
-2591.459865007036 1:0.315076 2:0.26741 3:0.609797 4:0.0138889 5:0.718247  
-469.0581619005063 1:0.285397 2:0.552104 3:0.567005 4:0.0173611 5:0.850426  
-1961.66292375856 1:0.713422 2:0.623873 3:0.505068 5:0.852608  
-1597.227788412088 1:0.745951 2:0.451653 3:0.768018 4:0.00694444 5:0.842389  
-7602.791080785487 1:0.379787 2:0.151052 3:0.601914 4:0.00347222 5:0.752203  
-3744.488053185401 1:0.832974 2:0.263527 3:0.60473 5:0.725681  
-10240 1:0.551957 2:0.294965 3:0.608671 4:0.00347222 5:0.708717  
-2814.508810496222 1:0.304442 2:0.277555 3:0.668356 4:0.00694444 5:0.754155  
-5362.126297691996 1:0.429137 2:0.20253 3:0.680743 4:0.00347222 5:0.764144  
-4460.434324514292 1:0.555919 2:0.266533 3:0.766892 4:0.00347222
